# Supplementary material for: Digitizing mass spectrometry data to explore the chemical diversity and distribution of marine cyanobacteria and algae
Source: eLife journal article supplement (doi:10.7554/elife.24214), 2017-05-11

Apratoxin B [M+H]  
Theoretical m/z = 826.4783  
Observed m/z = 826.4781

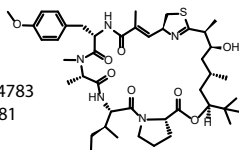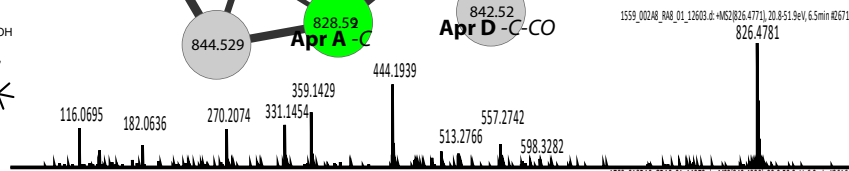

Apratoxin A [M+H]  
Theoretical m/z = 840.4940  
Observed m/z = 840.4936

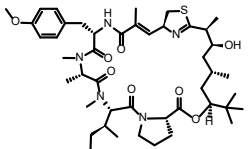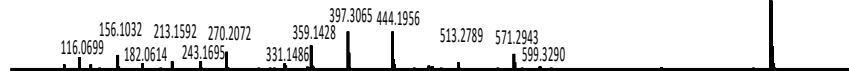

Apratoxin D [M+H]  
Theoretical m/z = 882.5409  
Observed m/z = 882.5399

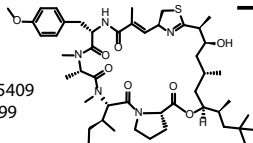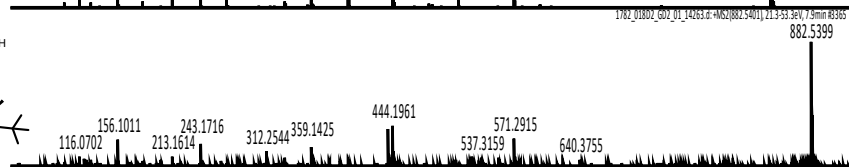

Apratoxin F [M+H]  
Theoretical m/z = 828.4940  
Observed m/z = 828.4941

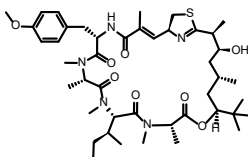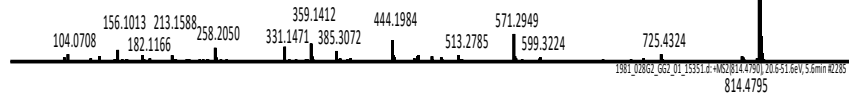

Apratoxin G [M+H]  
Theoretical m/z = 814.4783  
Observed m/z = 814.4795

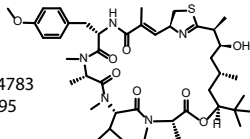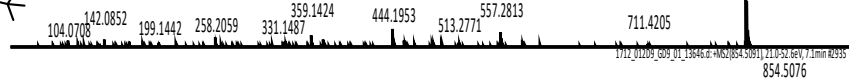

Apratoxin H [M+H]  
Theoretical m/z = 854.5096  
Observed m/z = 854.5076

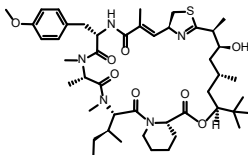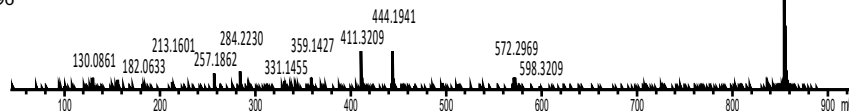

Supplement: supp [file elife_poa_e24214_Figure_3_Figure_Supplement_2.pdf › elife_poa_e24214_Figure_3_Figure_Supplement_2.pdf]
