# Supplementary material for: Digitizing mass spectrometry data to explore the chemical diversity and distribution of marine cyanobacteria and algae
Source: eLife journal article supplement (doi:10.7554/elife.24214), 2017-05-11
Supplement: supp [file elife_poa_e24214_Supplementary_File_2.docx]

**Figure 3- Supplementary file 2 - Supplemental table 1: GNPS molecular networking MS/MS based identification of molecules and molecular families.**

| **#** | **NP** | **Structure** | **Ref** | **Molecular family** |
| --- | --- | --- | --- | --- |
| 1 | Apratoxin B | 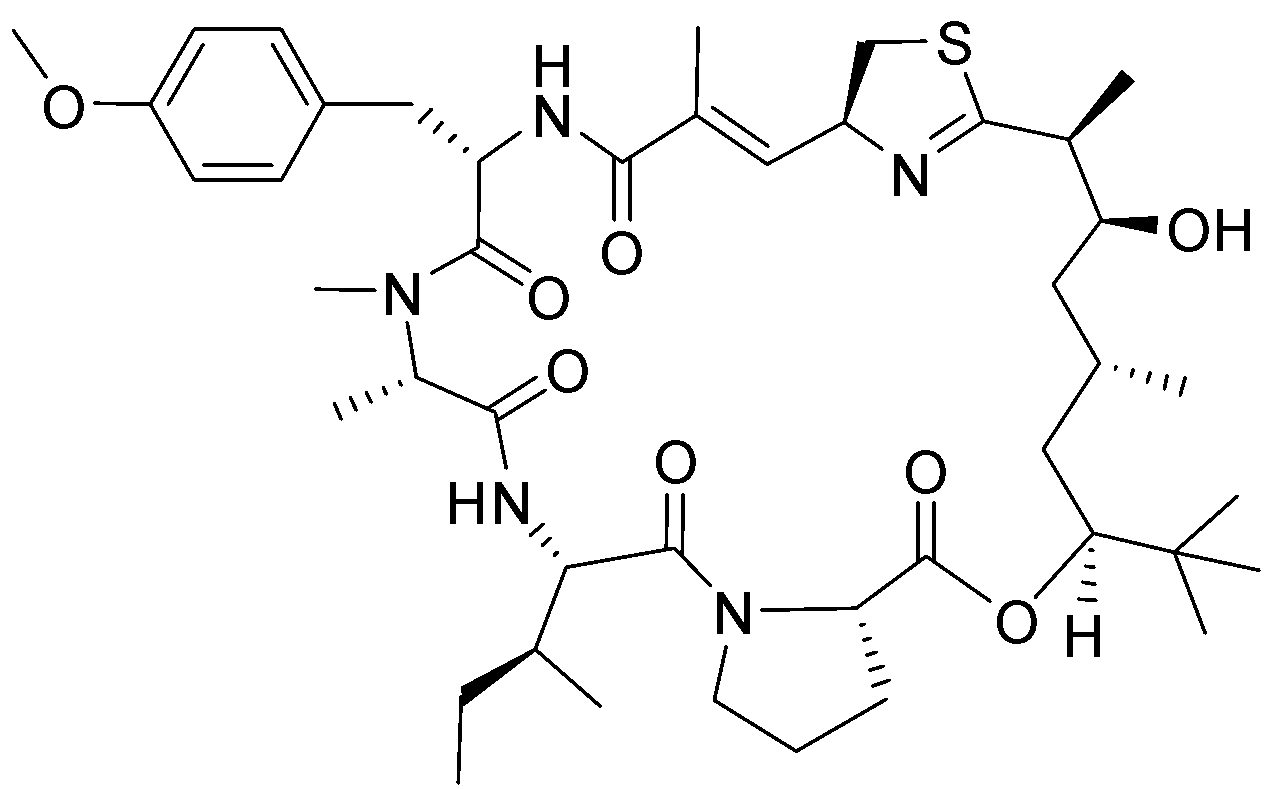 | ([Luesch, et al., 2002](#_z337ya)) | 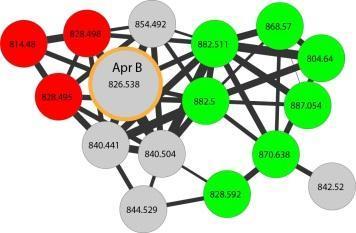 |
| 2 | Barbamide | 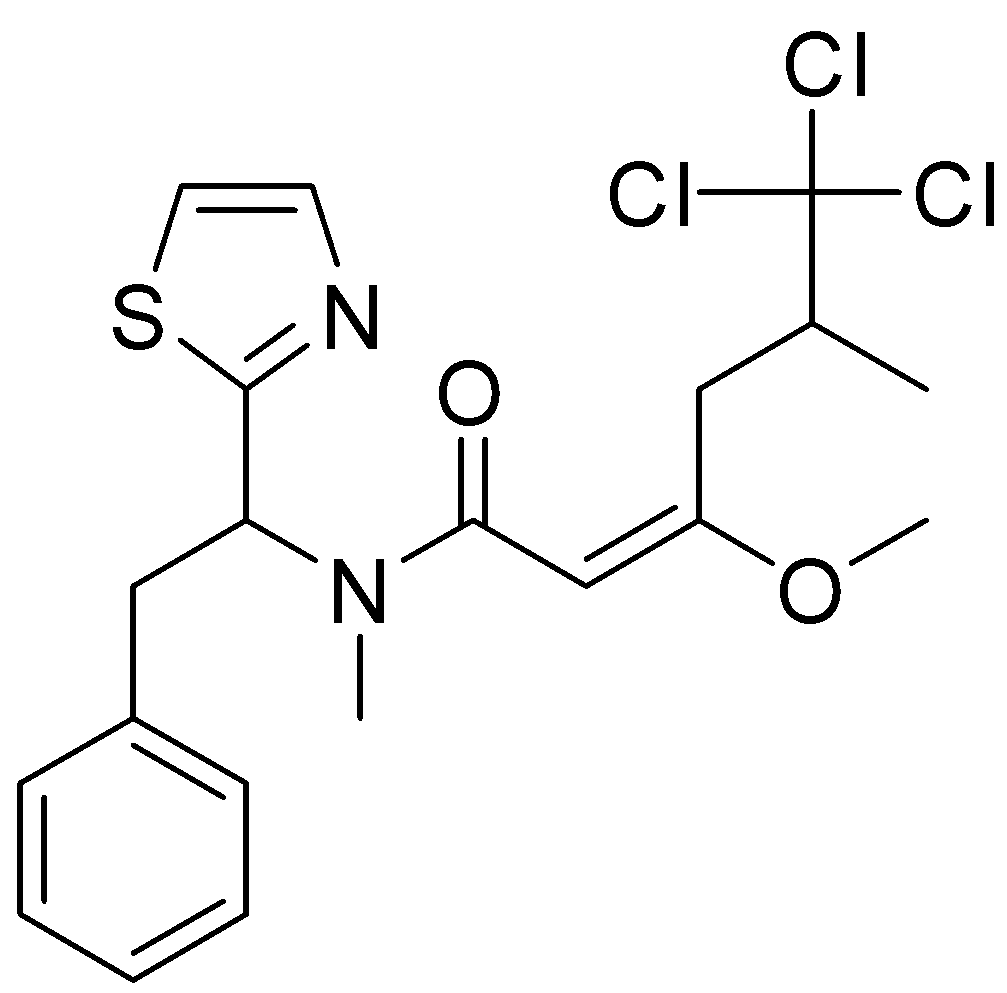 | ([Orjala and Gerwick, 1996](#_2xcytpi)) | 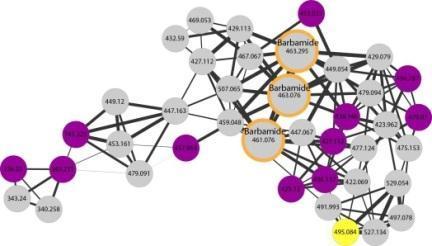 |
| 3 | Bouillonamide B | 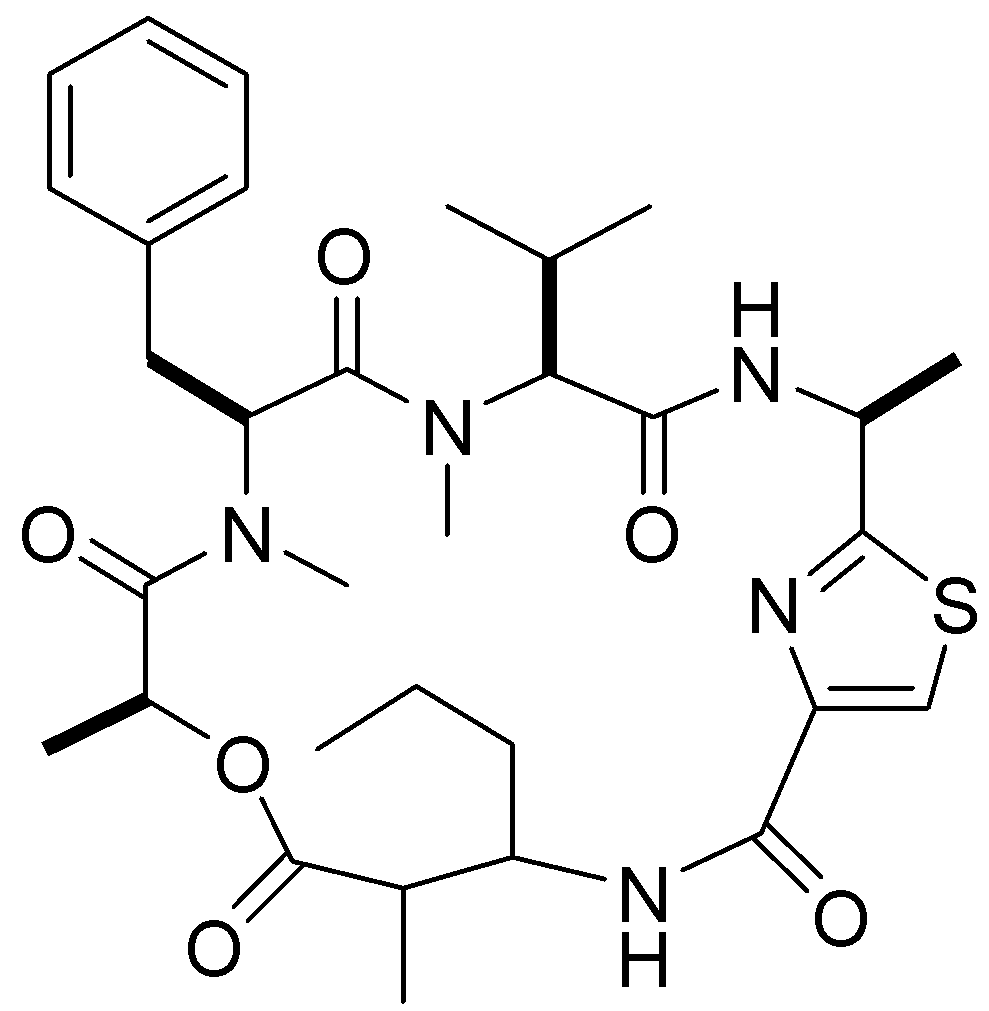 | ([Tan, et al., 2013](#_49x2ik5)) | 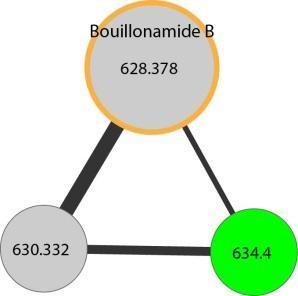 |
| 4 | Carmabin A | 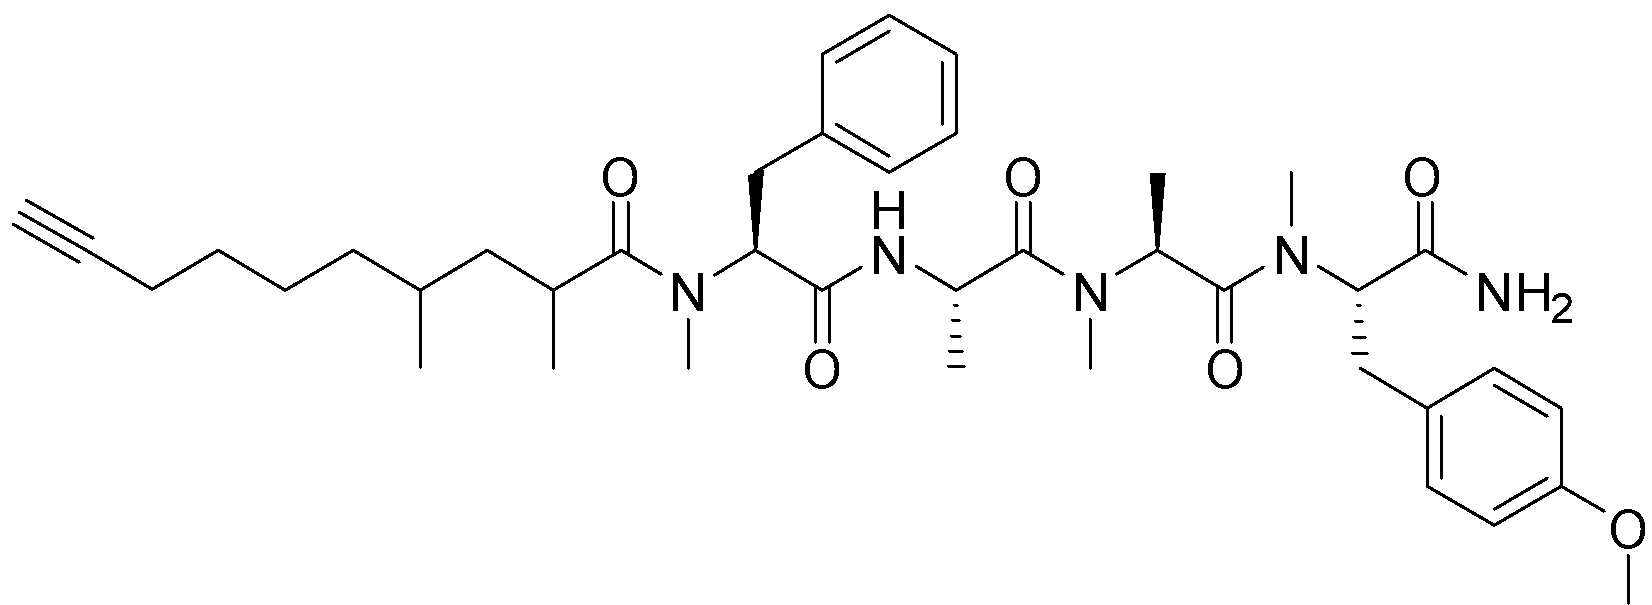 | ([Hooper, et al., 1998](#_2jxsxqh)) | 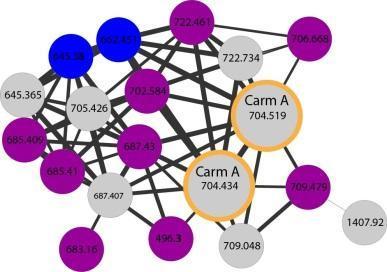 |
| 5 | Curacin A |  | ([Blokhin, et al., 1995](#_tyjcwt)) | 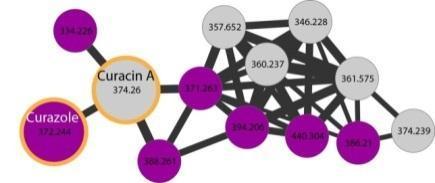 |
| 6 | Curazole |  | ([Esquenazi, et al., 2008](#_17dp8vu)) |
| 7 | Cyanolide A | 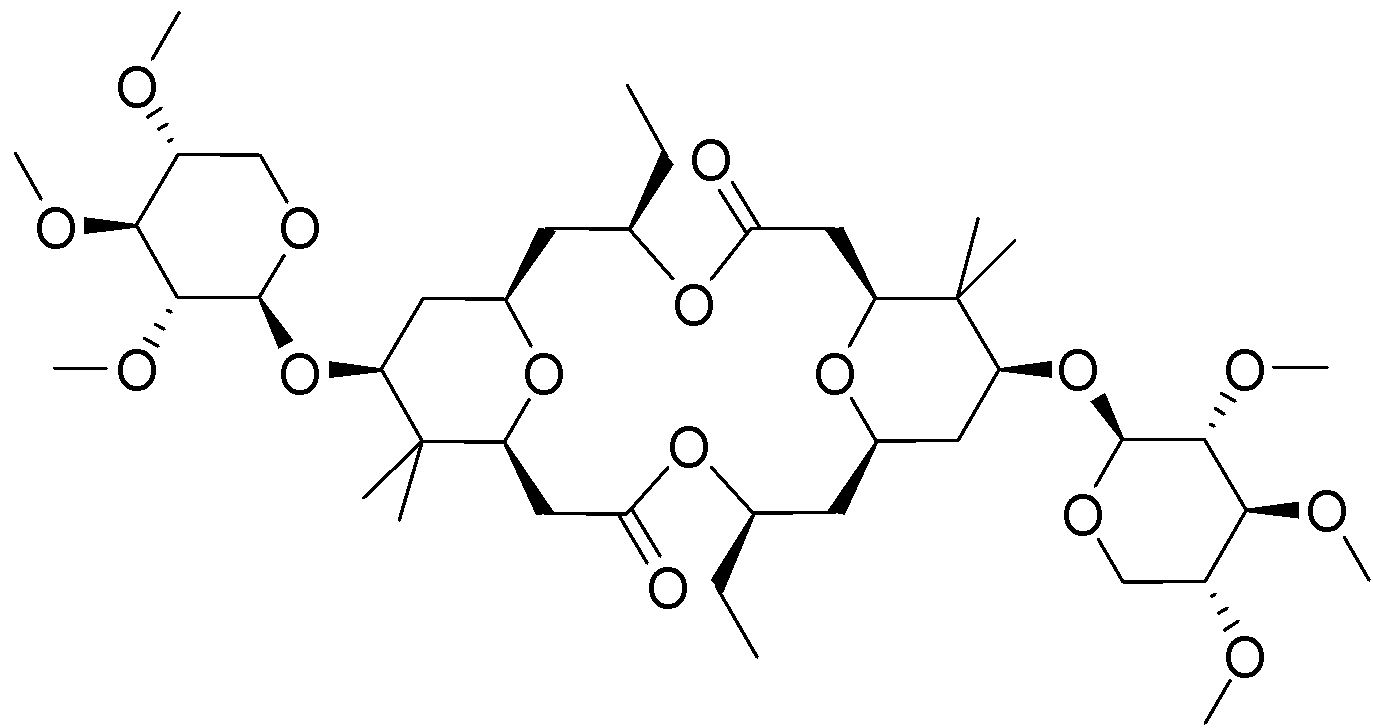 | ([Pereira, et al., 2010](#_qsh70q)) | 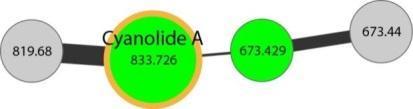 |
| 8 | Dolastatin 10 | 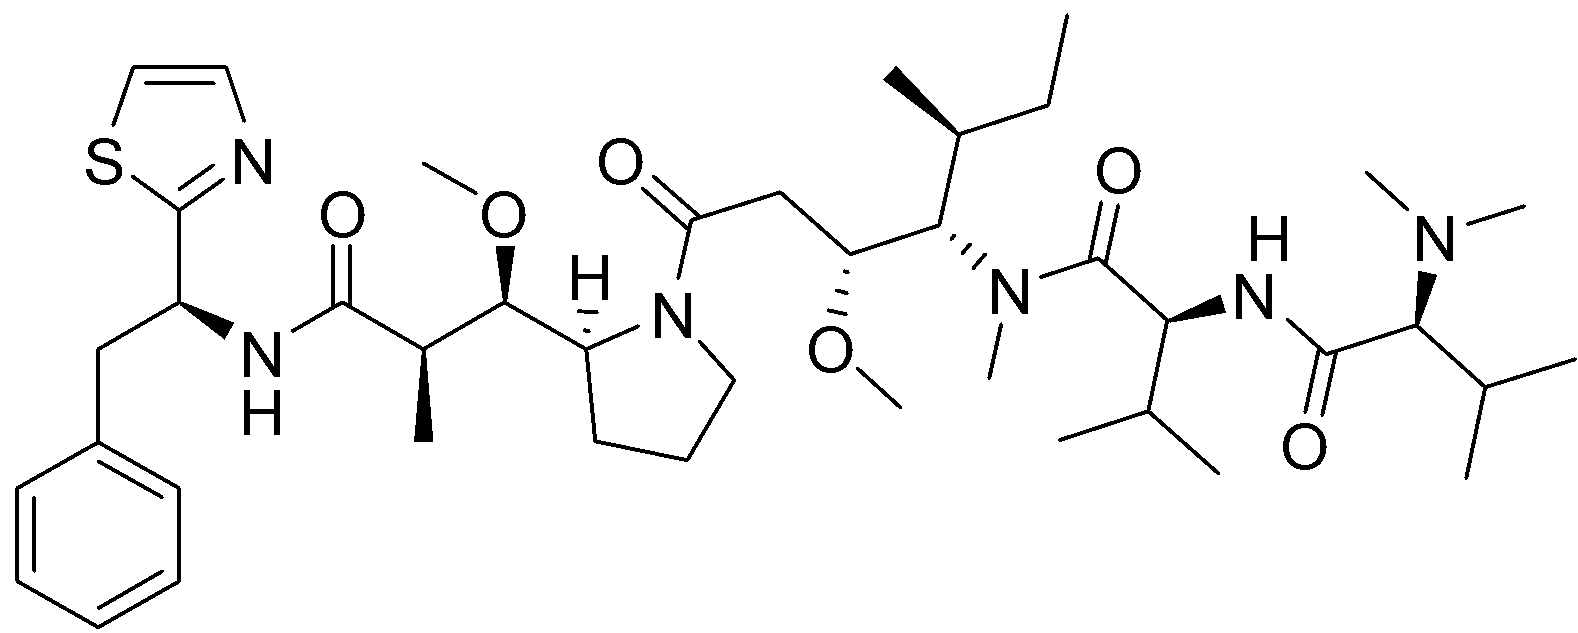 | ([Bai, et al., 1990](#_2et92p0)) | 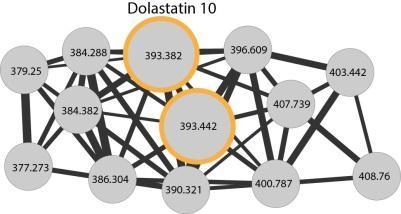 |
| 9 | Dolastatin 12 | 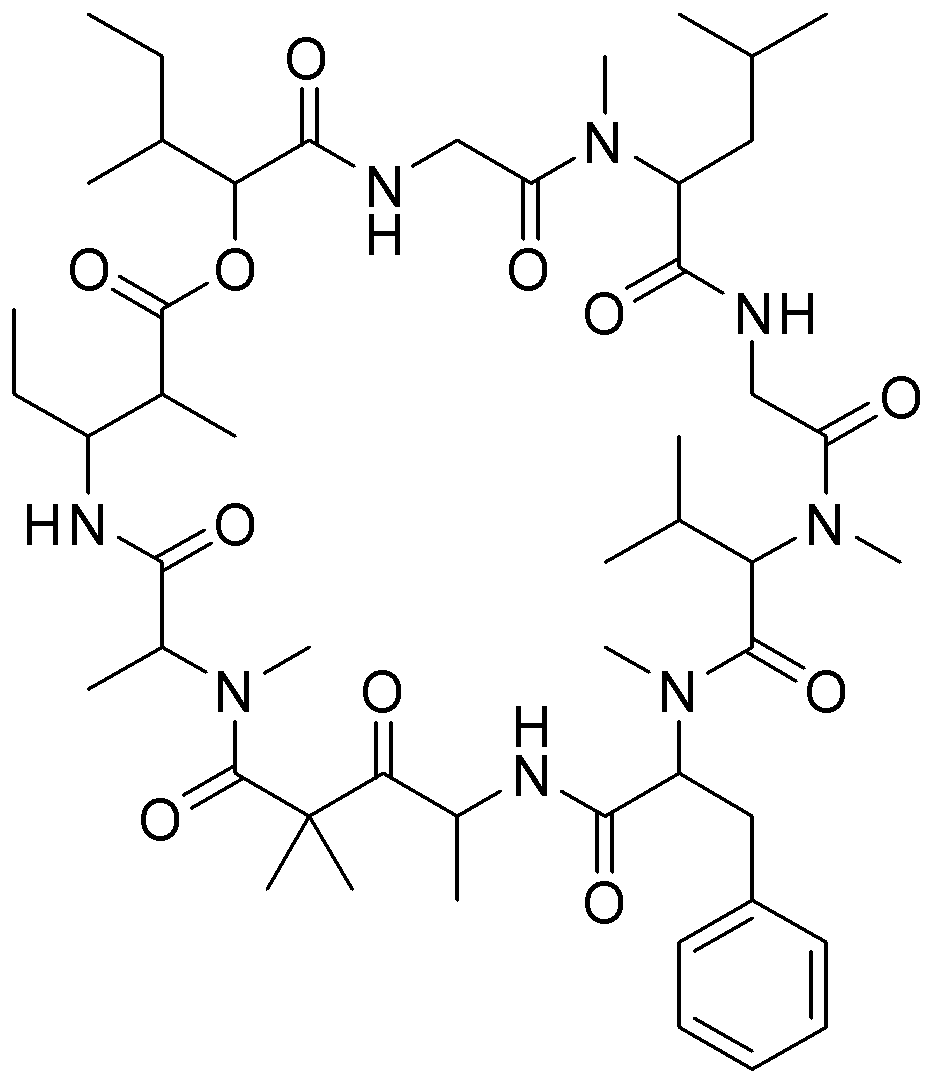 | ([Harrigan, et al., 1998](#_44sinio)) | 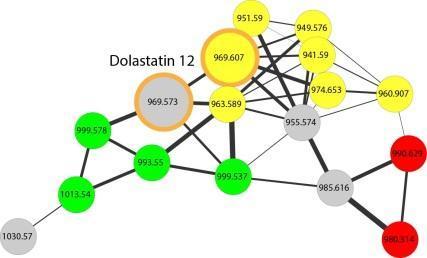 |
| 10 | Ecklonialactone A | 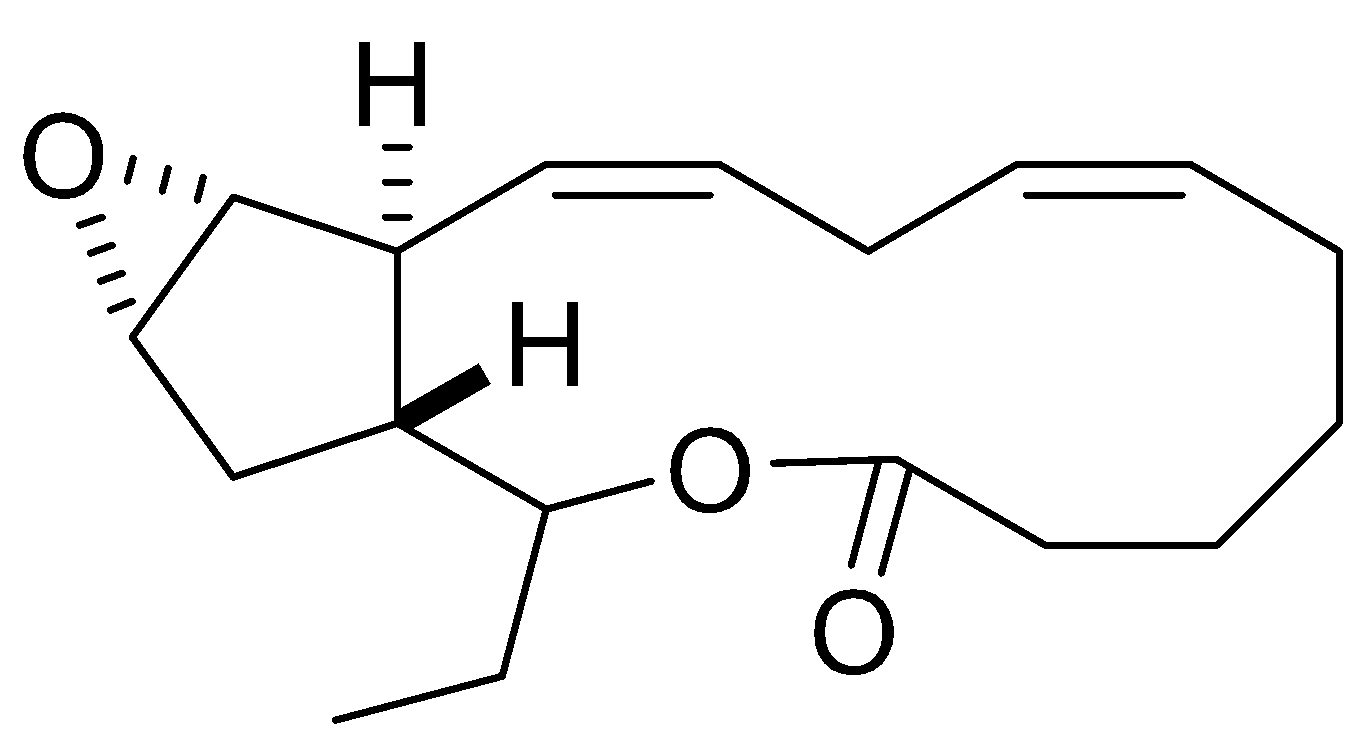 | ([Todd, et al., 1994](#_147n2zr)) | 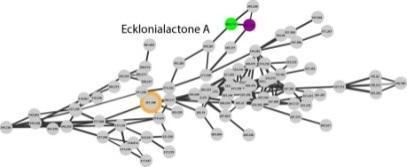 |
| 11 | Hectochlorin | 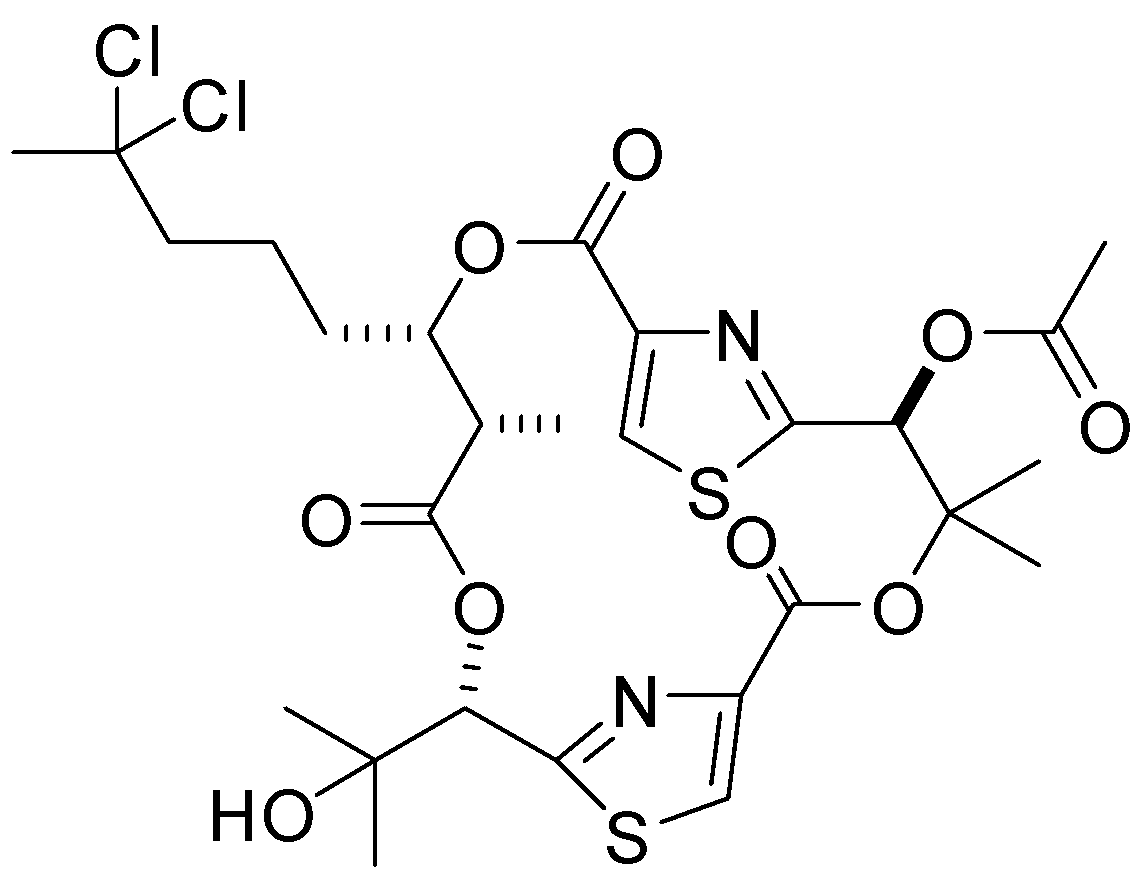 | ([Marquez, et al., 2002](#_3j2qqm3)) | 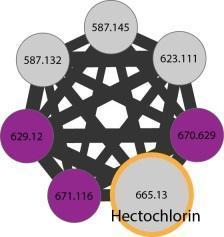 |
| 12 | Hoiamide A  [M+H]+ | 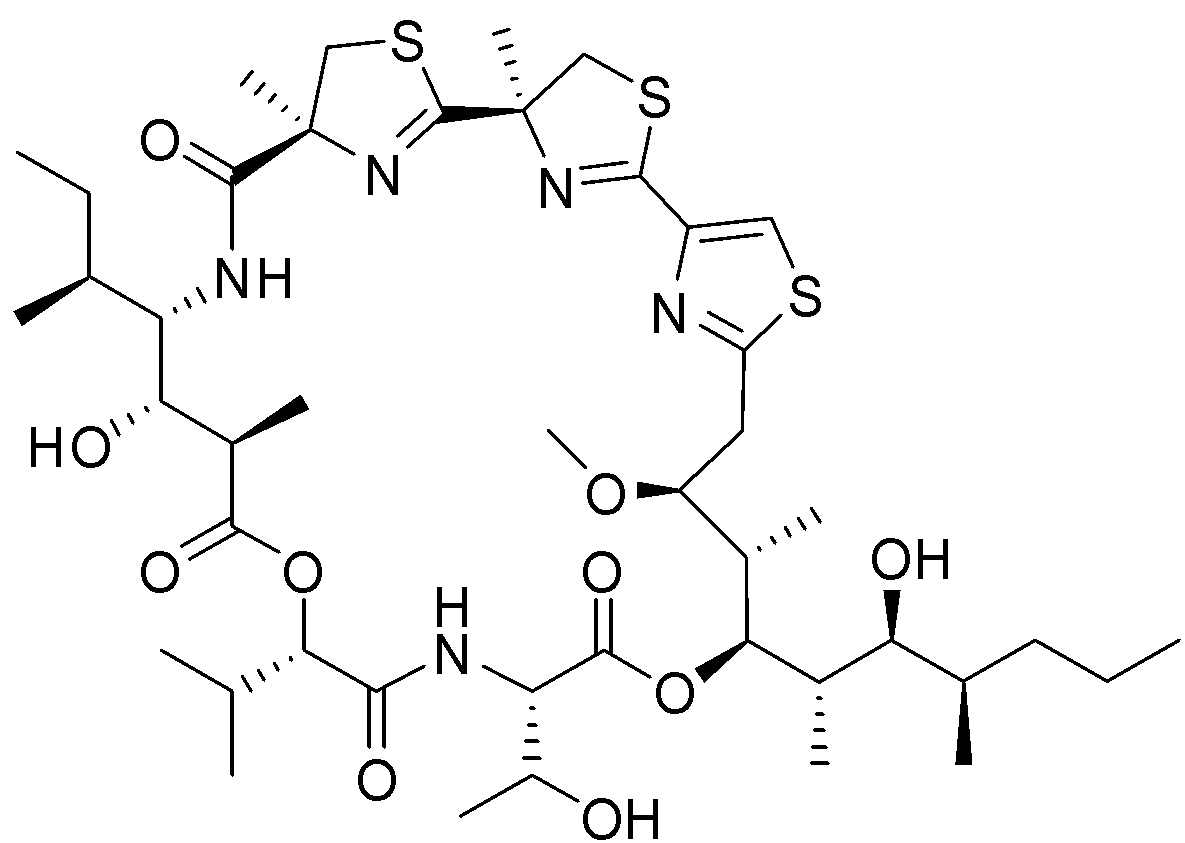 | ([Pereira, et al., 2009](#_3whwml4)) | 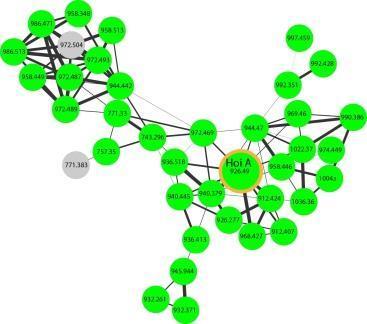 |
| 13 | Hoiamide B  [M+Na]+ | 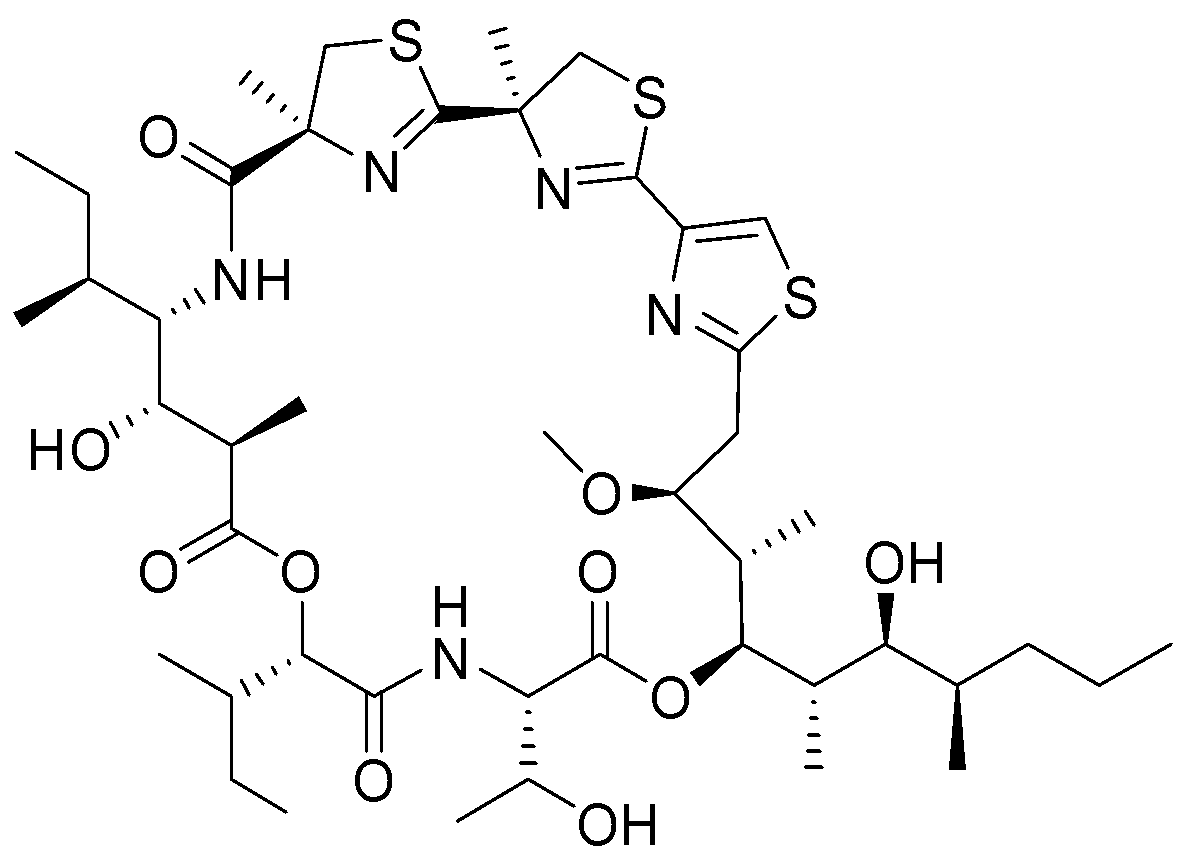 | ([Choi, et al., 2010](#_4d34og8)) | 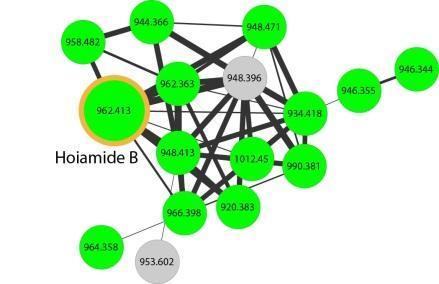 |
| 14 | Janthielamide | 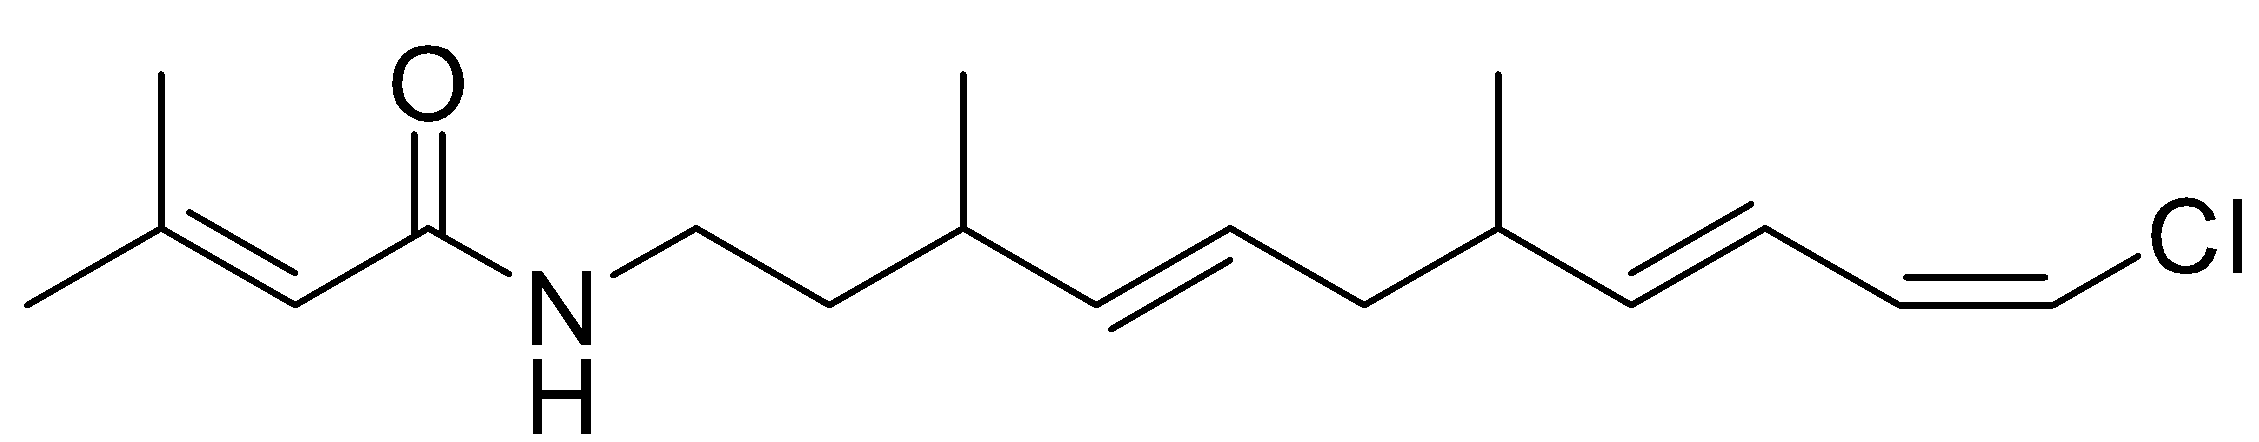 | ([Nunnery, et al., 2012](#_1y810tw)) | 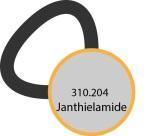 |
| 15 | Lyngbyatoxin A | 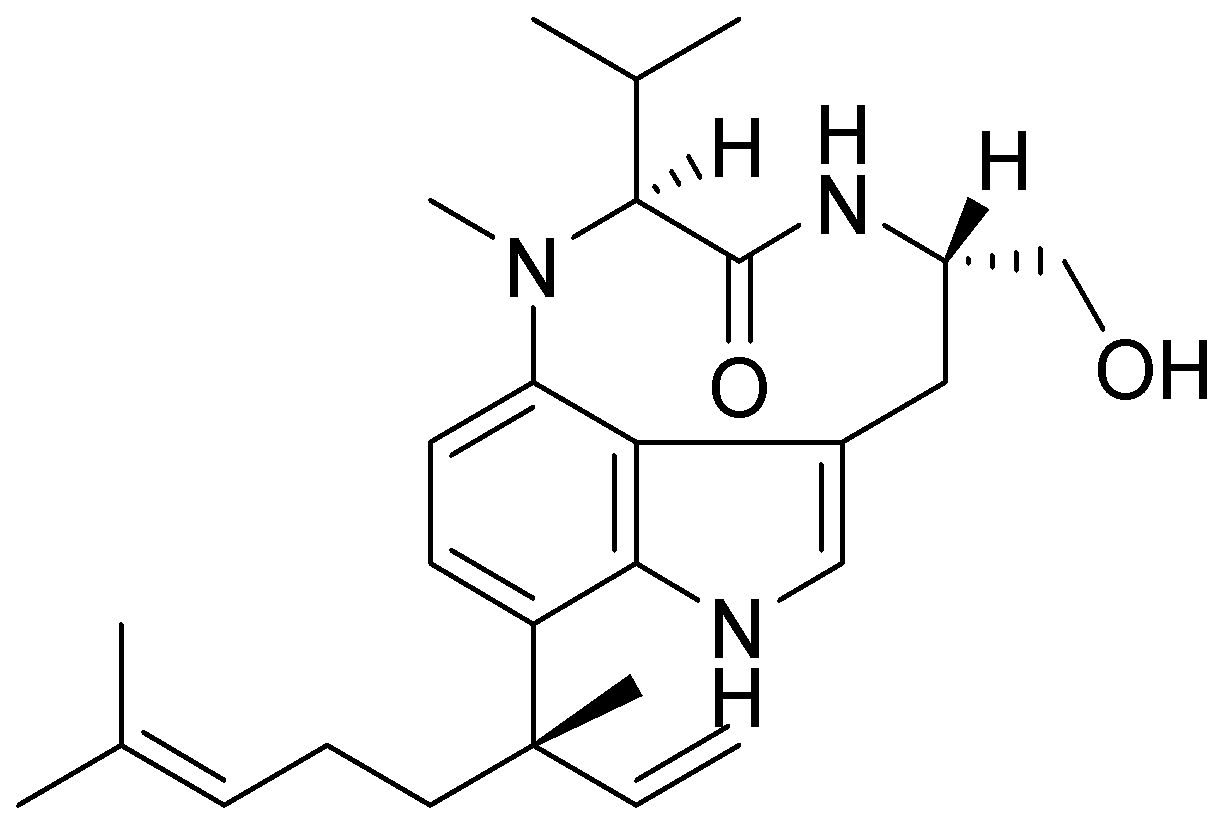 | ([Cardellina, et al., 1979](#_1t3h5sf)) | 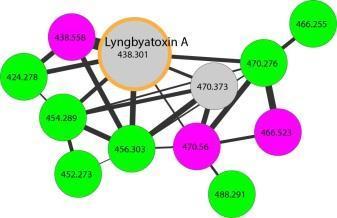 |
| 16 | Majusculamide A/B | 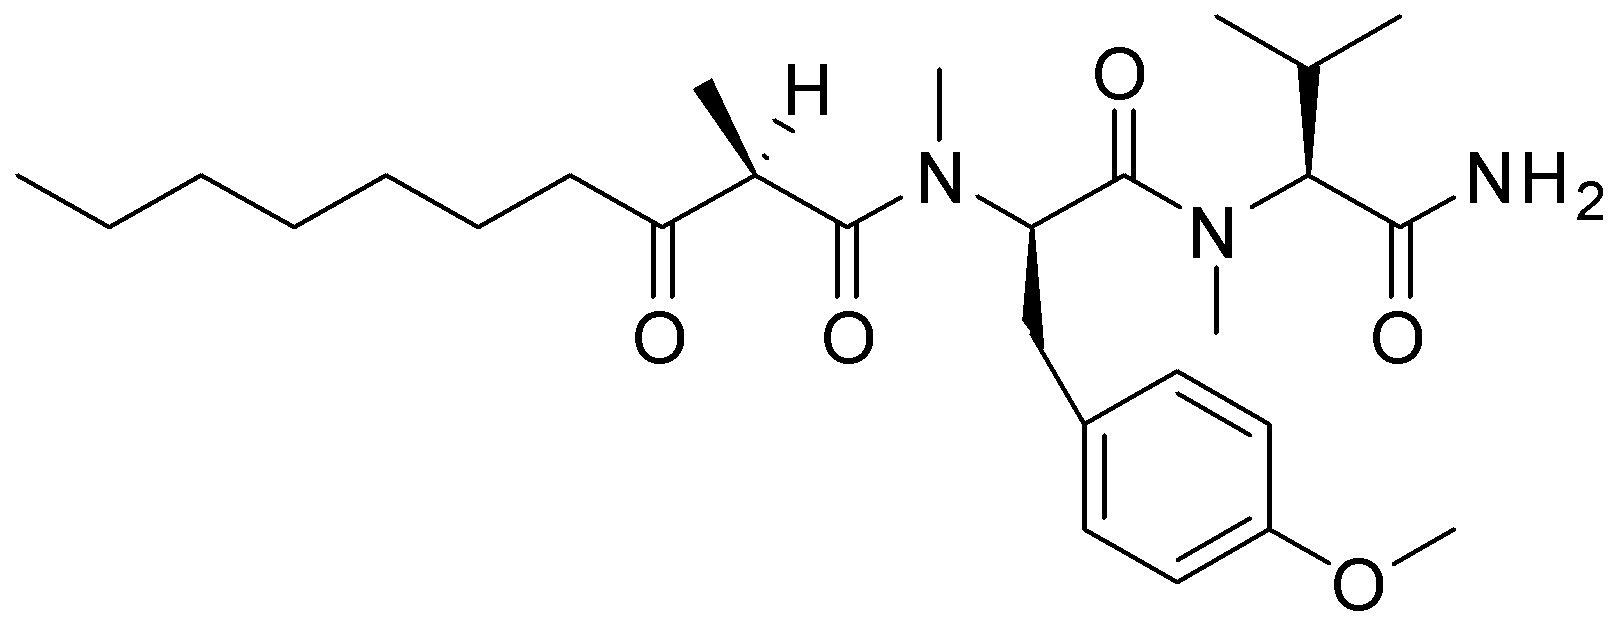 | ([Tan, et al., 2010](#_1pxezwc)) | 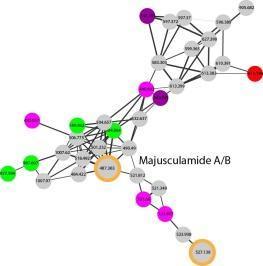 |
| 17 | Malyngamide C | 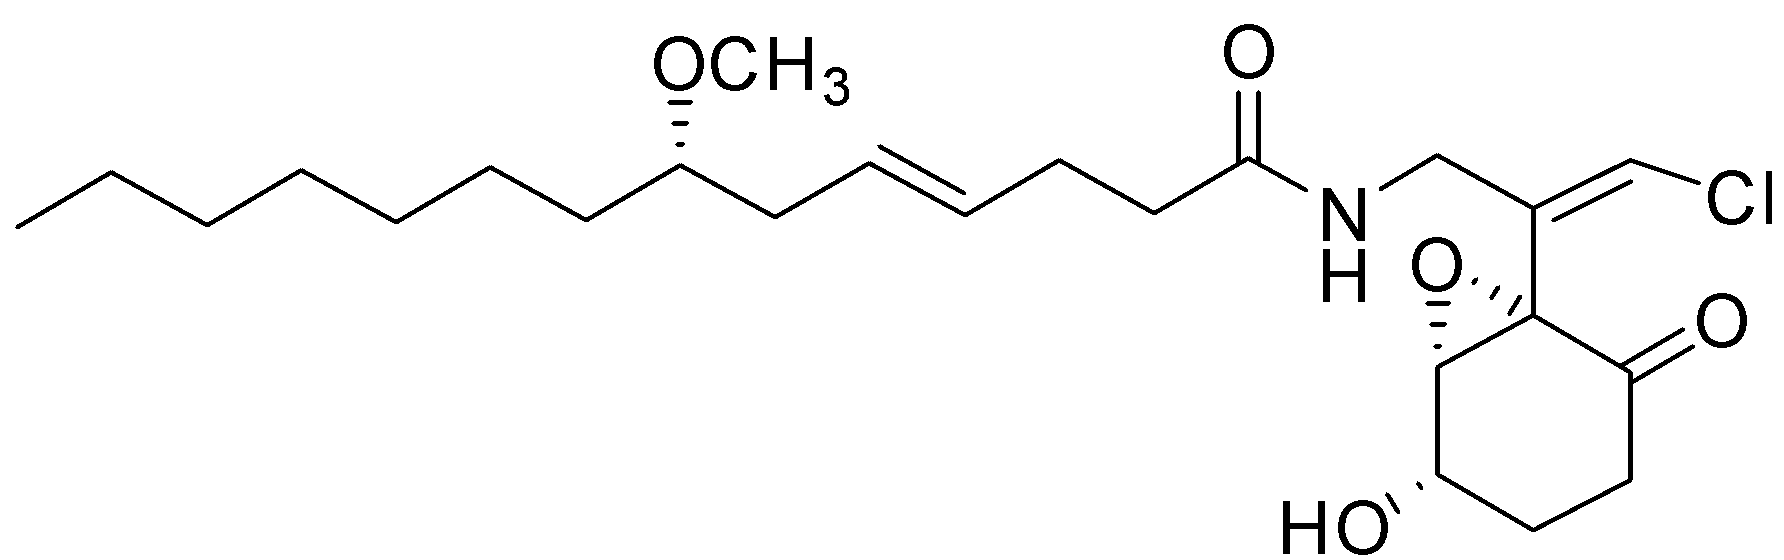 | ([Gross, et al., 2010](#_lnxbz9)) | 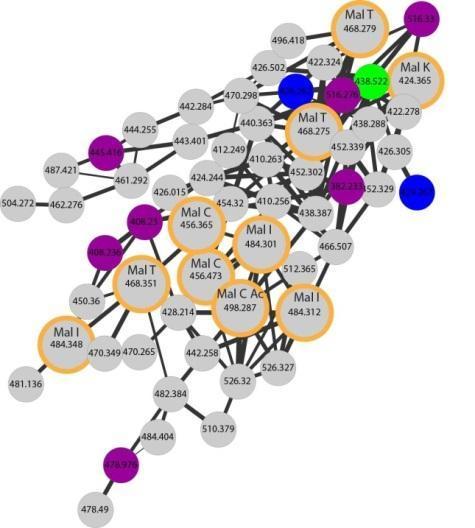 |
| 18 | Malyngamide C acetate | 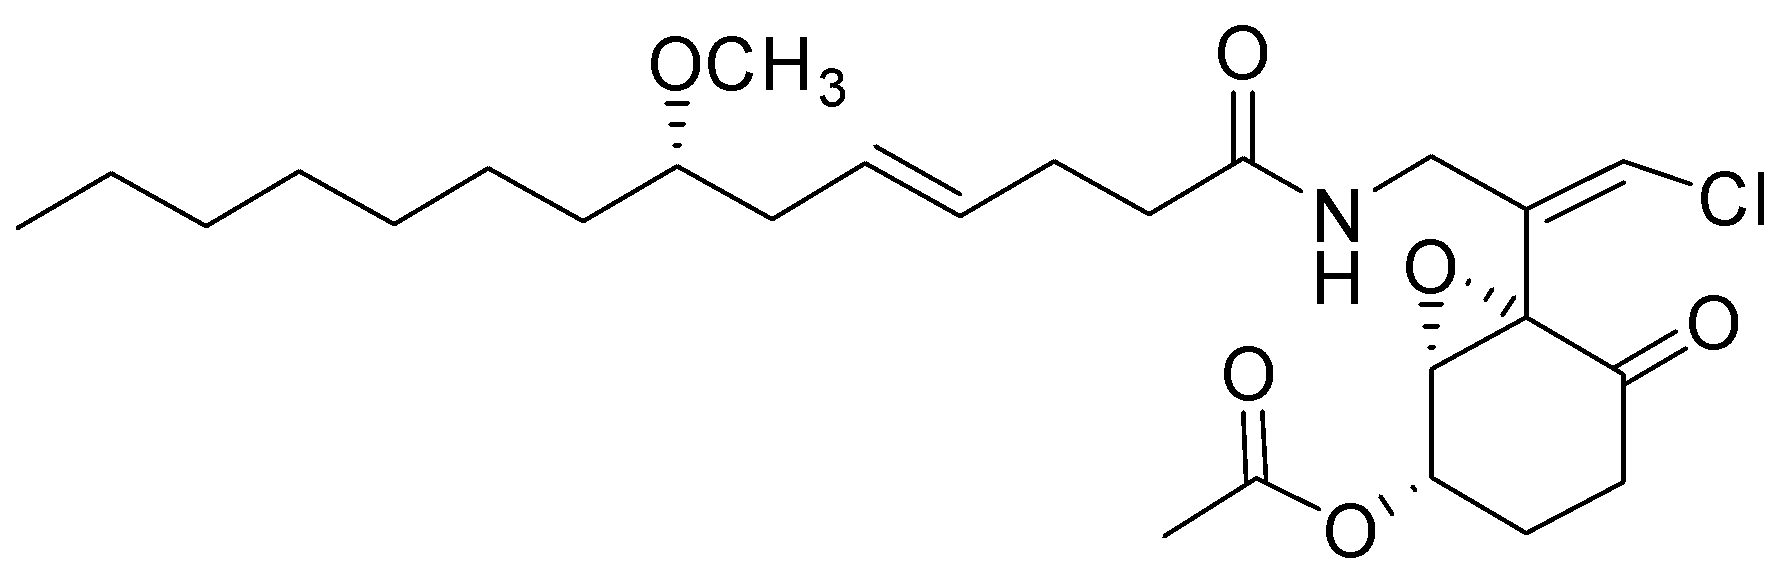 |  |
| 19 | Malyngamide I | 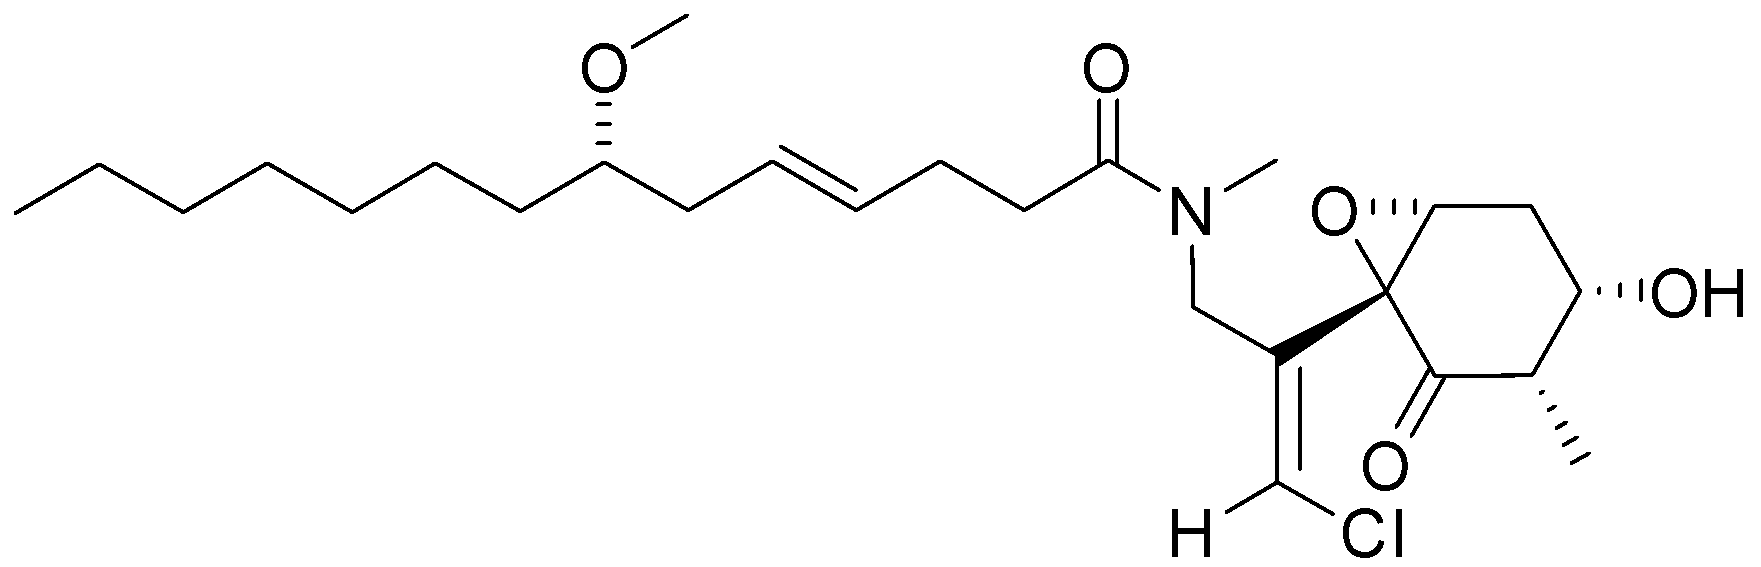 |  |
| 20 | Malyngamide H | 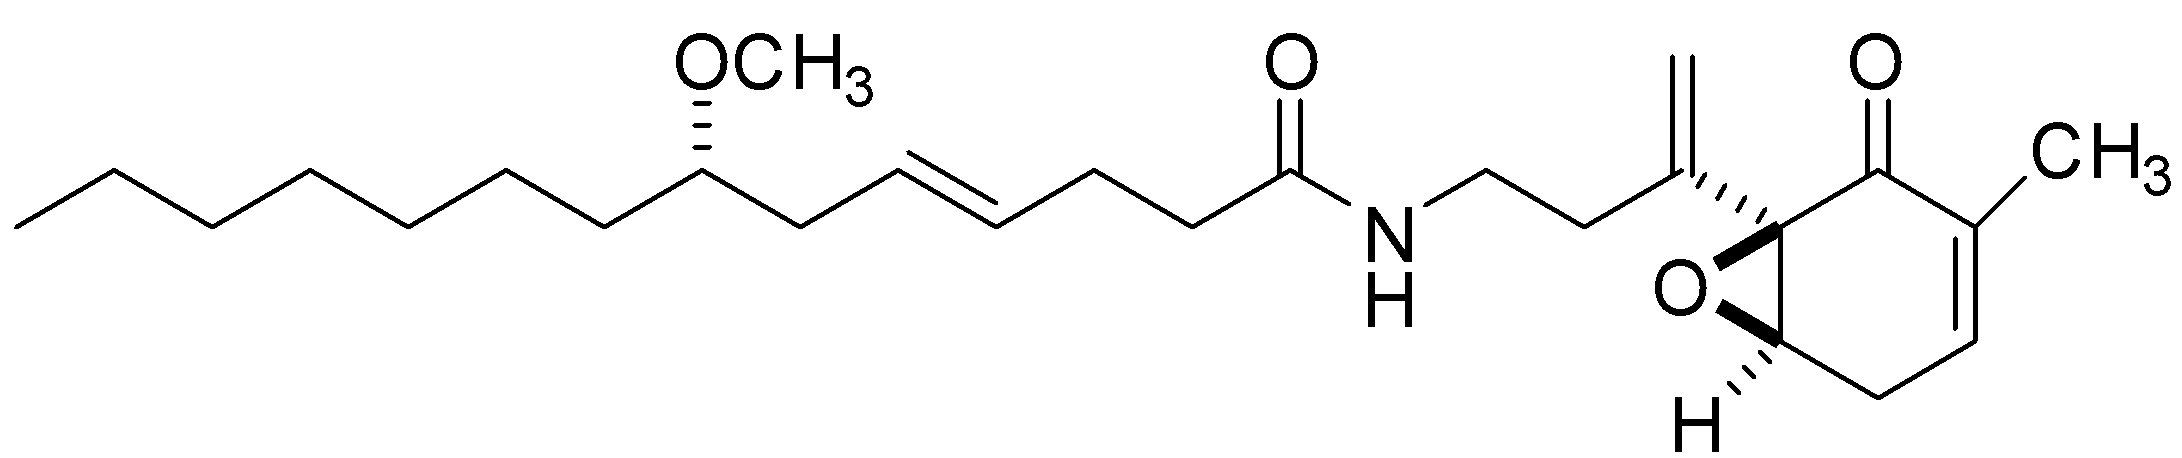 | ([Orjala, et al., 1995](#_1ci93xb)) |
| 21 | Malyngamide K | 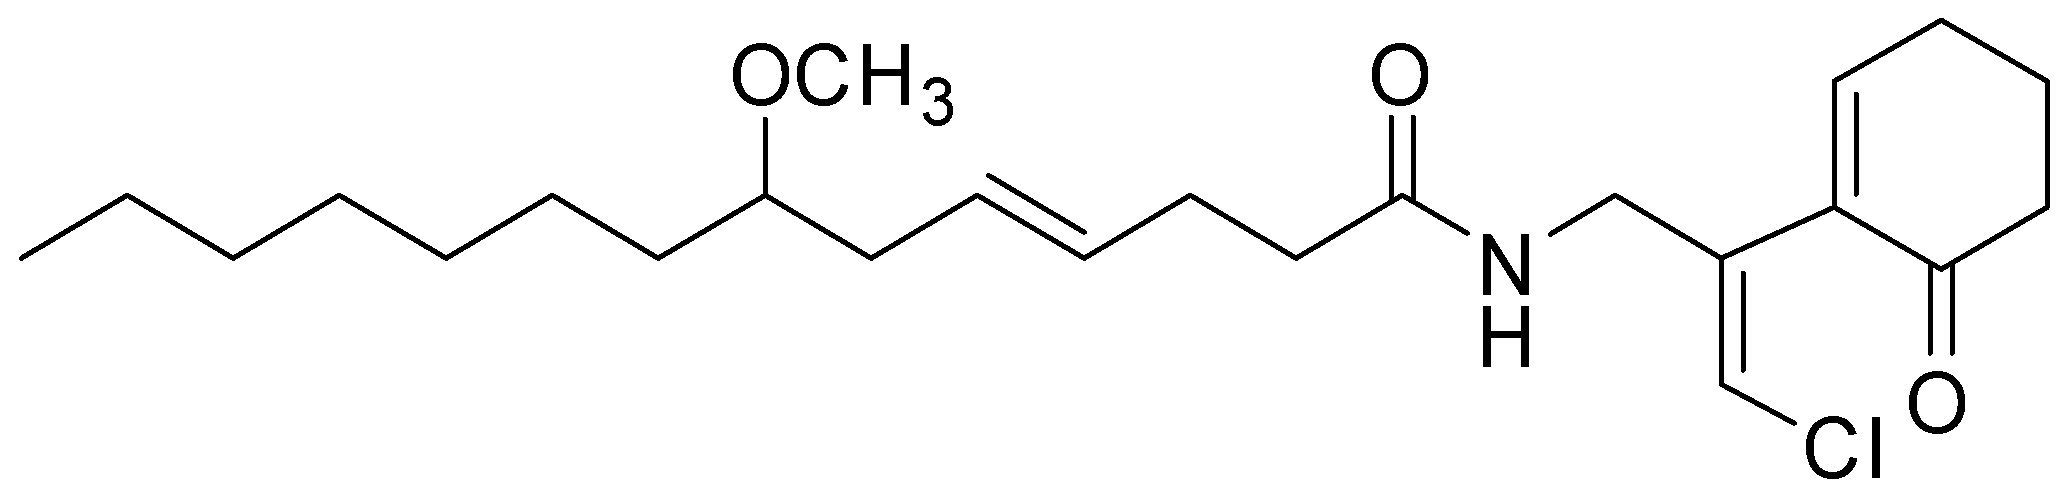 |  |
| 22 | Malyngamide T | 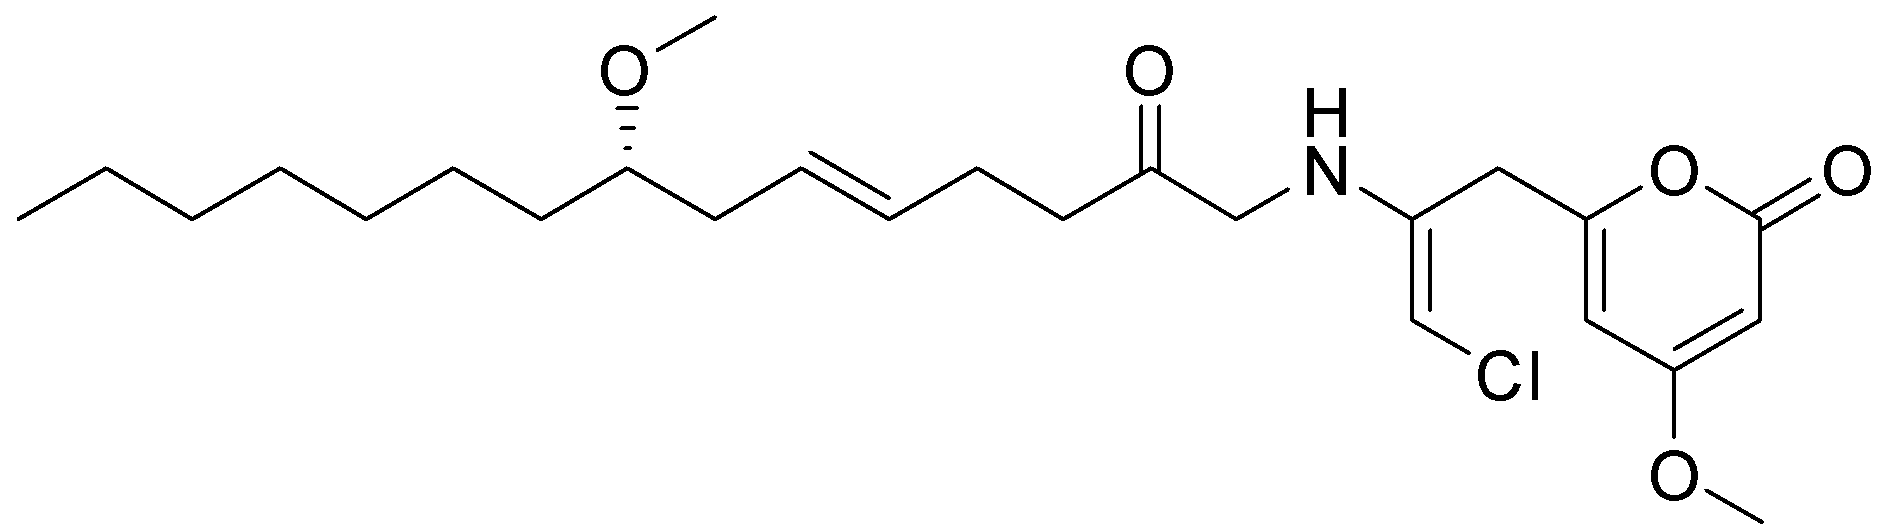 |  |
| 23 | Microcolin B | 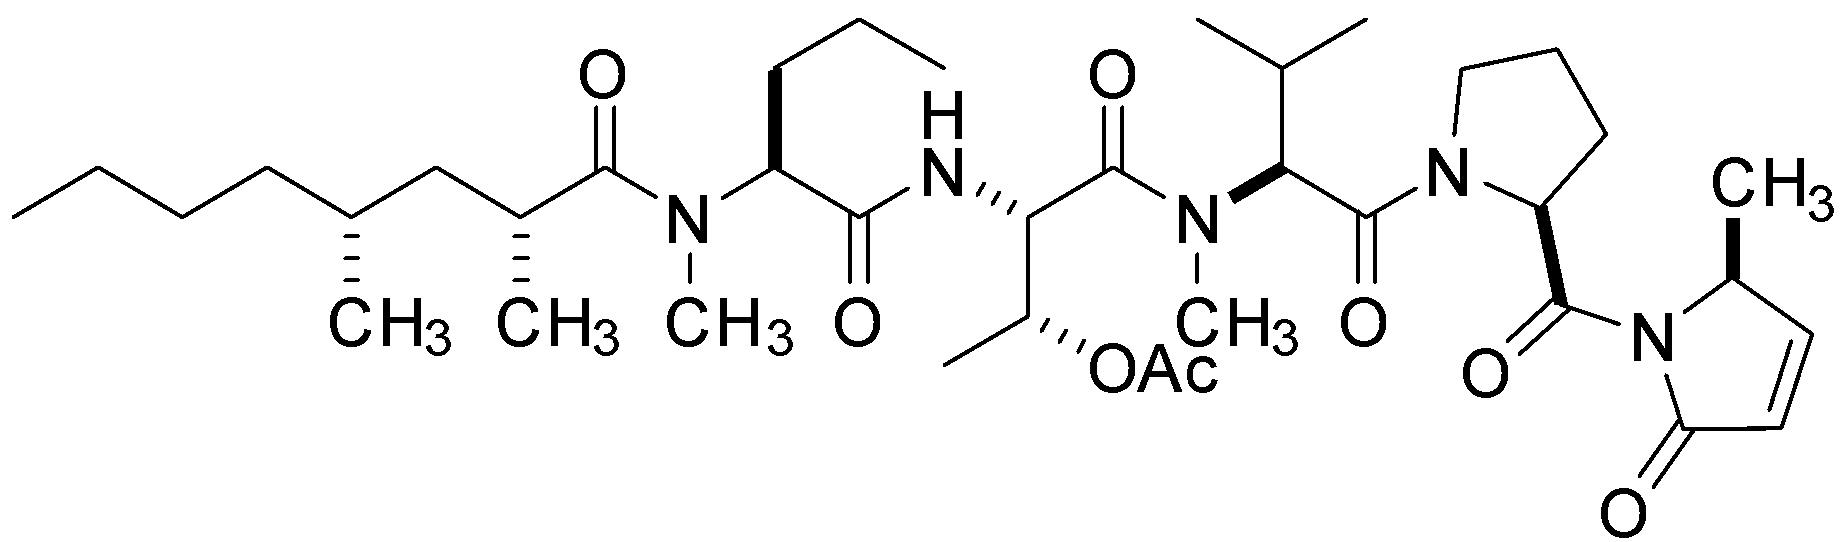 |  | 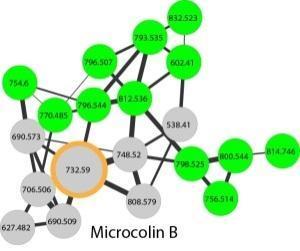 |
| 24 | Palmyramide A | 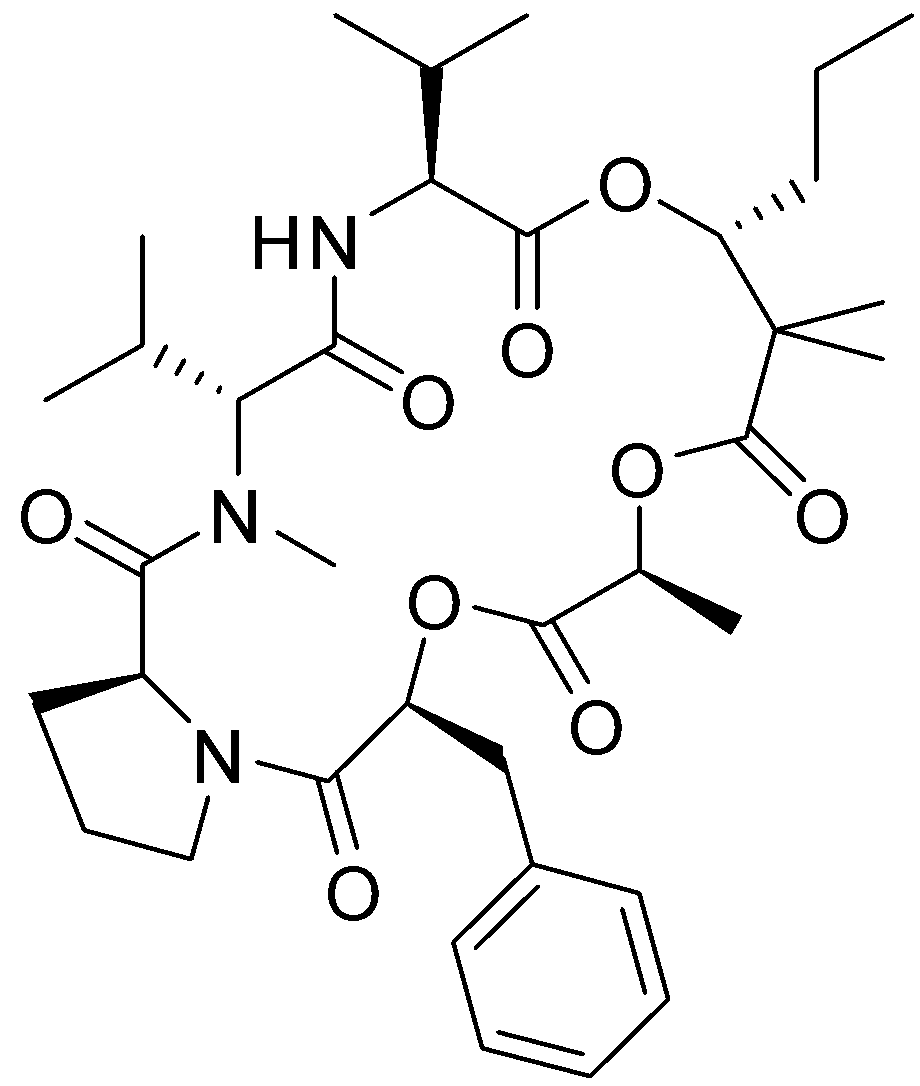 | ([Taniguchi, et al., 2010](#_2p2csry)) | 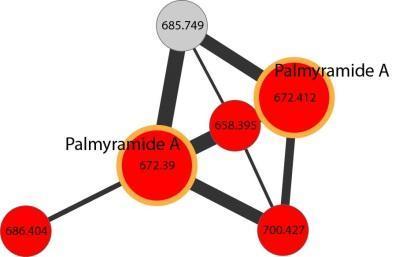 |
| 25 | Palmyrolide A | 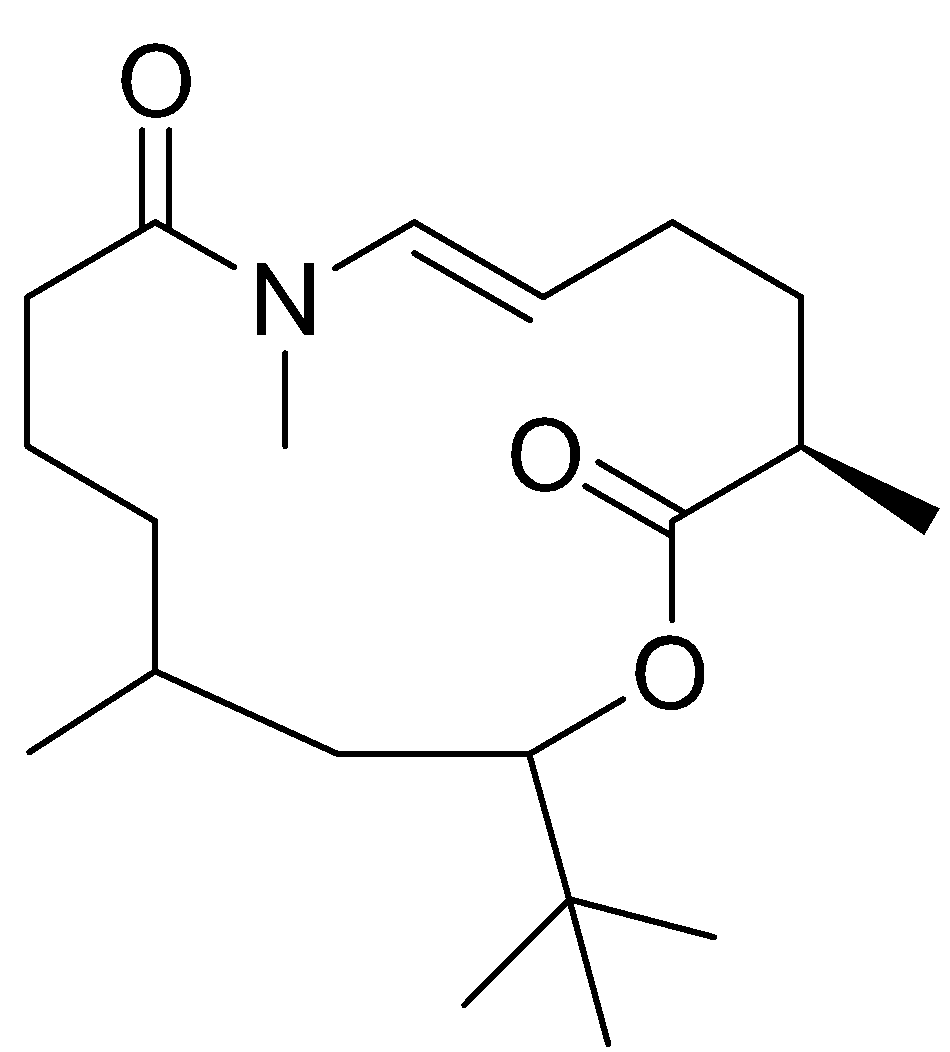 | ([Pereira, et al., 2010](#_2bn6wsx)) | 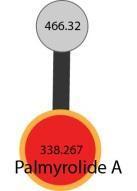 |
| 26 | Scytonemin | 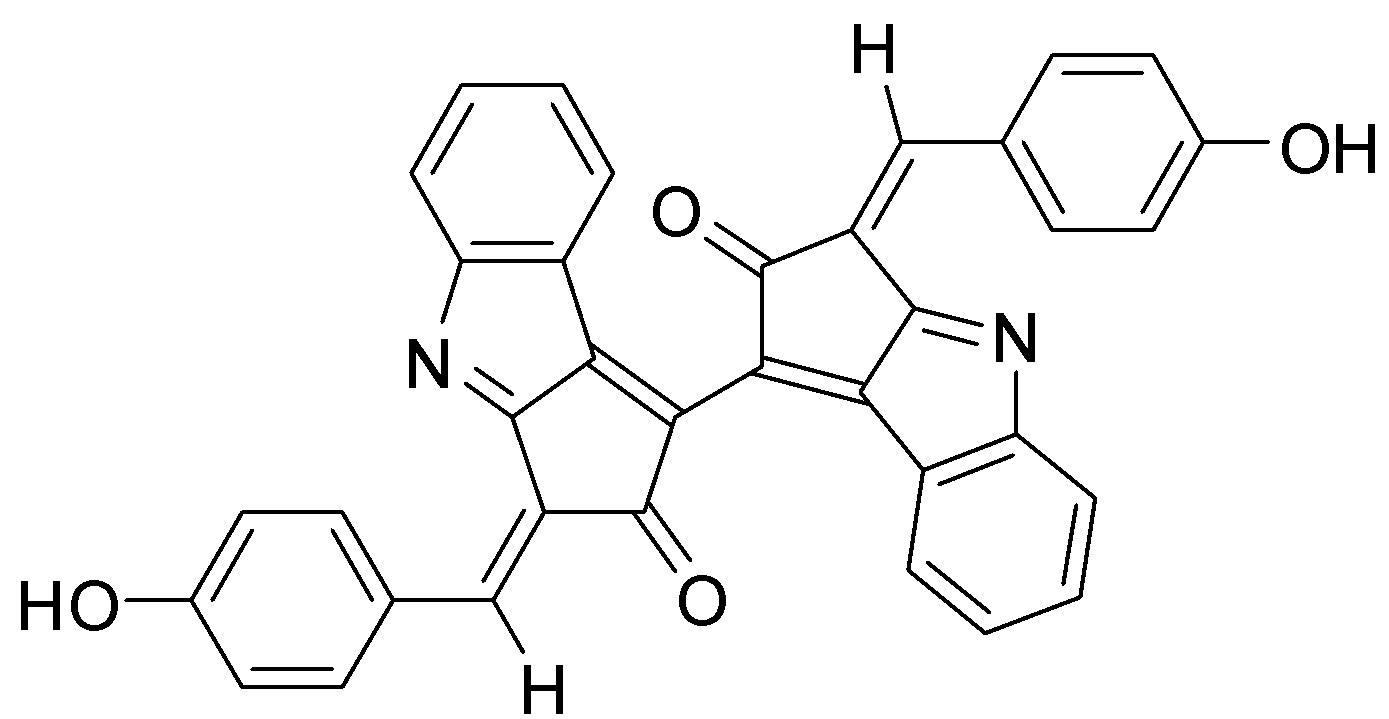 | ([Garcia-Pichel, et al., 1992](#_3rdcrjn)) | 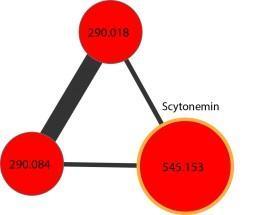 |
| 27 | Stypoltrione | 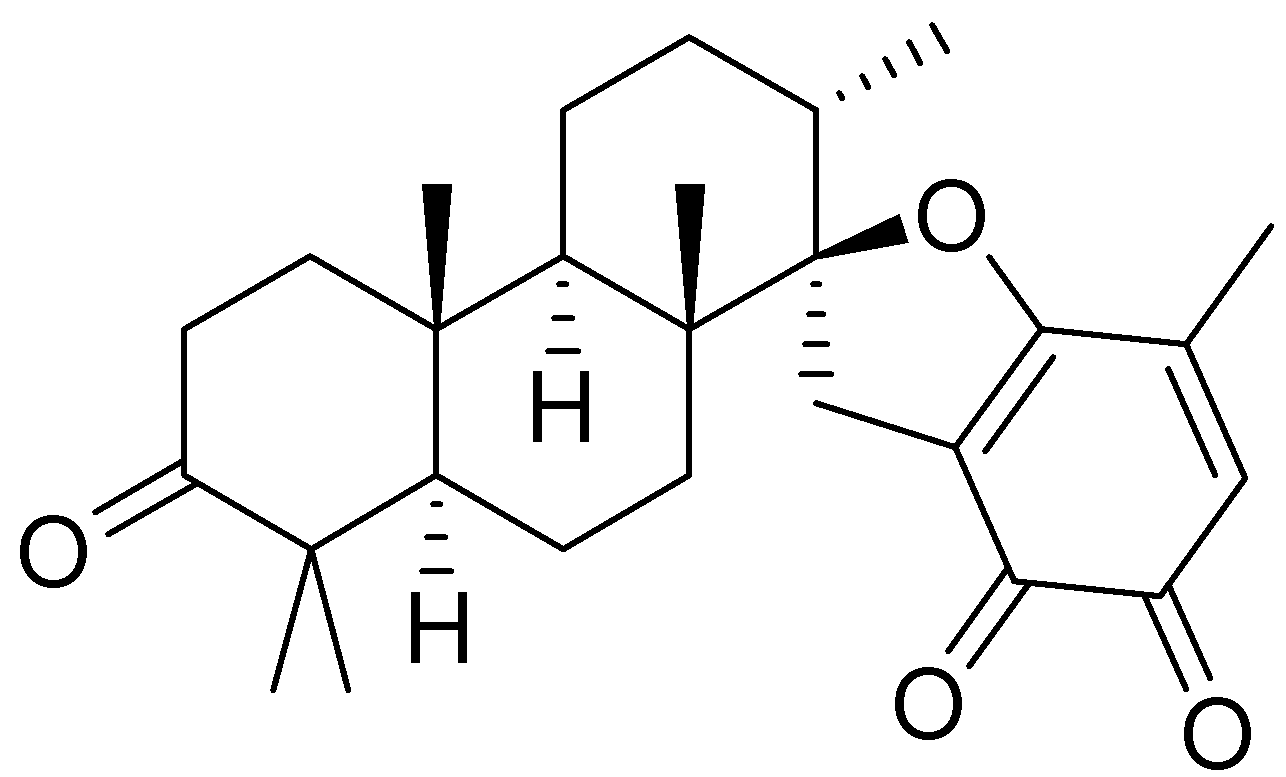 | ([O'Brien, et al., 1983](#_4i7ojhp)) | 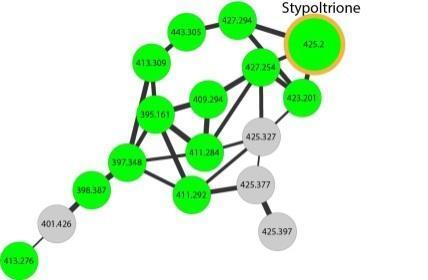 |
| 28 | Tumonoic Acid I | 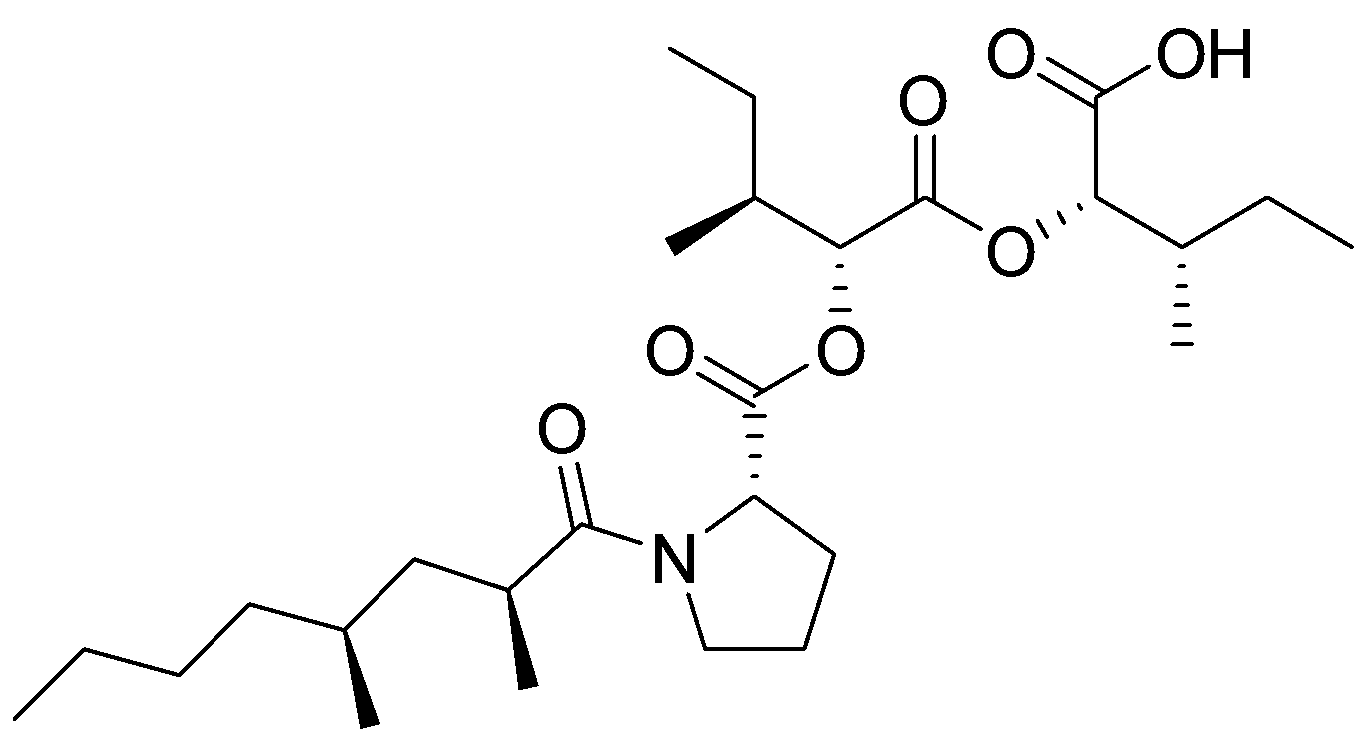 | ([Harrigan, et al., 1999](#_1ksv4uv)) | 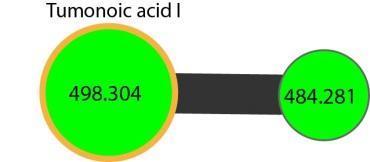 |
| 29 | Viequeamide A | 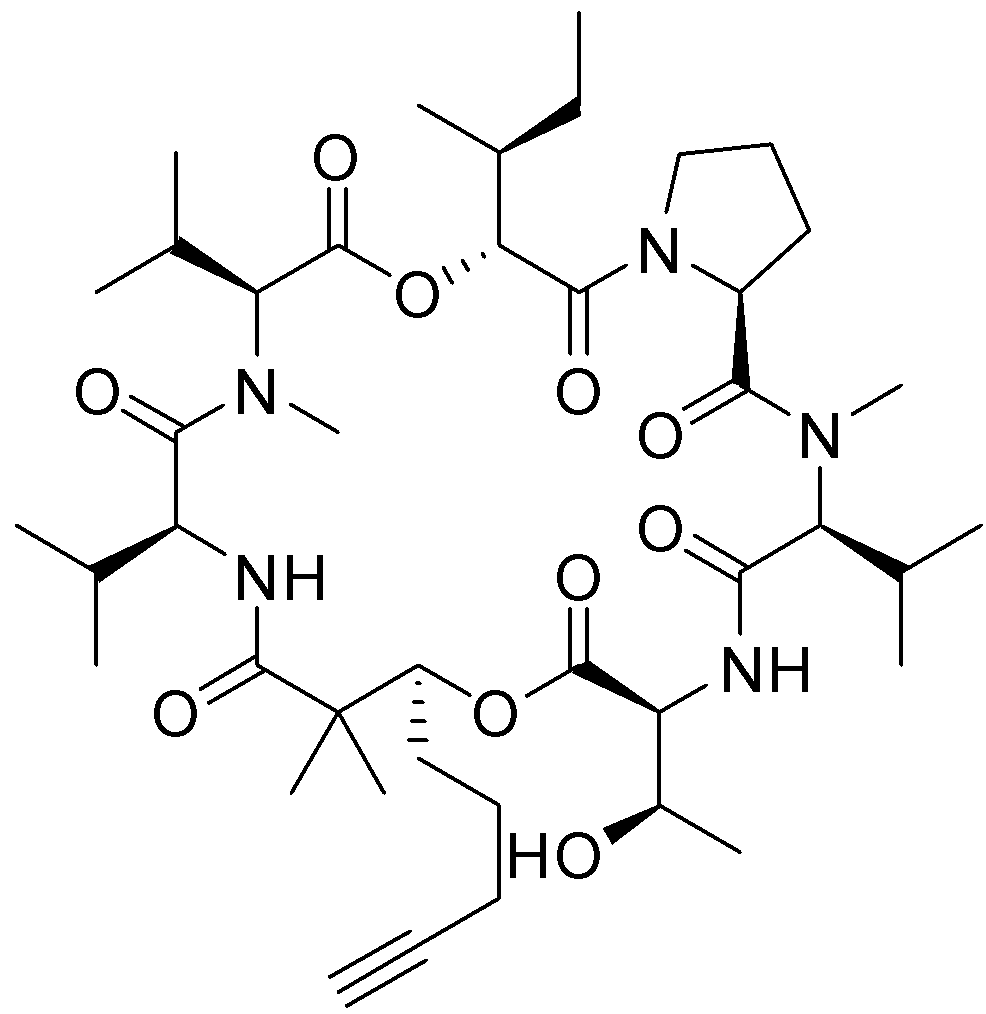 | ([Boudreau, et al., 2012](#_3dy6vkm)) | 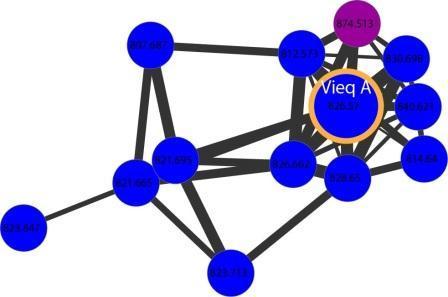 |
| 30 | Viequeamide B | 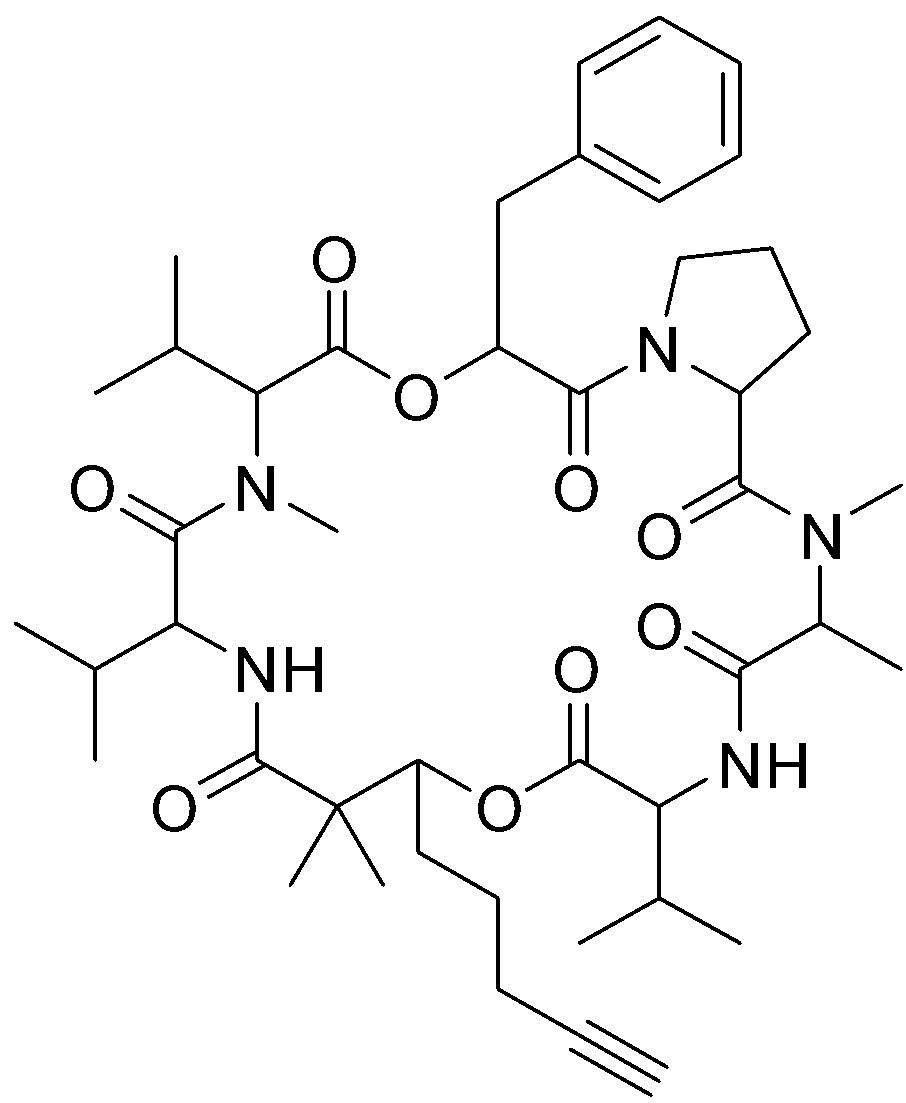 | ([Boudreau, et al., 2012](#_3dy6vkm)) | 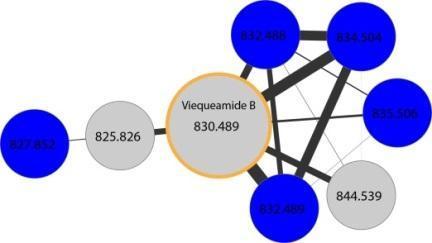 |
