# Supplementary material for: Digitizing mass spectrometry data to explore the chemical diversity and distribution of marine cyanobacteria and algae
Source: eLife. 2017 May 11;6:e24214. doi: 10.7554/eLife.24214 (PMC5441867; doi:10.7554/eLife.24214)
Supplement: Supplementary file 1. — Sample list and metadata are freely available upon registration at http://qiita.microbio.me Study ID:10125. Also refers to Figures 2, 3, 4 and 5. DOI: http://dx.doi.org/10.7554/eLife.24214.015 [file elife-24214-supp1.xlsx]

## Sheet: 10125_20150818-225527 (1).txt
sample_name	altitude	anonymized_name	assigned_from_geo	collection_timestamp	common_name	country	data_file_name	depth	description	dna_extracted	elevation	env_biome	env_feature	env_matter	field_taxonomy	fraction	has_extracted_data	has_physical_specimen	host_common_name	host_scientific_name	host_subject_id	host_taxid	latitude	longitude	physical_location	physical_specimen_location	physical_specimen_remaining	public	required_sample_info_status	sample_location	sample_type	taxon_id	title	type_of_sample
10125.DMSO.A2027.031A12.RA12.01.18746.mzXML	0	DMSO_A2027_031A12_RA12_01_18746.mzXML	TRUE	2014-01-01	unclassified metagenome	GAZ:United States of America	DMSO_A2027_031A12_RA12_01_18746.mzXML	0	DMSO.control DMSO.control	FALSE	0	ENVO:aquatic biome	ENVO:water	ENVO:sterile water	DMSO.control	DMSO.control	TRUE	TRUE	DMSO.control	DMSO.control	DMSO.A2027.031A12.RA12.01.18746	408172	32.8427	-117.258	UCSD	UCSDMI	TRUE	FALSE	completed	UCSD	control DMSO	256138	Cyanobacteria	CONTROL
10125.1552.001C1.RC1.01.12531.mzXML	0	1552_001C1_RC1_01_12531.mzXML	TRUE	2005-12-16	marine metagenome	GAZ:United States of America	1552_001C1_RC1_01_12531.mzXML	0	HI16DEC05 Lyngbya majuscula	FALSE	0	ENVO:marine biome	ENVO:sea water	ENVO:organic material	Lyngbya majuscula	Crude	TRUE	TRUE	Lyngbya majuscula	cyanobacteria	1552.001C1.RC1.01.12531	1117	19.4281	-155.917	UCSD	UCSDMI	TRUE	FALSE	completed	UCSD	cyanobacteria	408172	Cyanobacteria	HAWAII
10125.1552.001C10.RC10.01.12539.mzXML	0	1552_001C10_RC10_01_12539.mzXML	TRUE	2005-12-16	marine metagenome	GAZ:United States of America	1552_001C10_RC10_01_12539.mzXML	0	HI16DEC05 Lyngbya majuscula	FALSE	0	ENVO:marine biome	ENVO:sea water	ENVO:organic material	Lyngbya majuscula	I	TRUE	TRUE	Lyngbya majuscula	cyanobacteria	1552.001C10.RC10.01.12539	1117	19.4281	-155.917	UCSD	UCSDMI	TRUE	FALSE	completed	UCSD	cyanobacteria	408172	Cyanobacteria	HAWAII
10125.1552.001C2.RC2.01.12532.mzXML	0	1552_001C2_RC2_01_12532.mzXML	TRUE	2005-12-16	marine metagenome	GAZ:United States of America	1552_001C2_RC2_01_12532.mzXML	0	HI16DEC05 Lyngbya majuscula	FALSE	0	ENVO:marine biome	ENVO:sea water	ENVO:organic material	Lyngbya majuscula	A	TRUE	TRUE	Lyngbya majuscula	cyanobacteria	1552.001C2.RC2.01.12532	1117	19.4281	-155.917	UCSD	UCSDMI	TRUE	FALSE	completed	UCSD	cyanobacteria	408172	Cyanobacteria	HAWAII
10125.1552.001C3.RC3.01.12533.mzXML	0	1552_001C3_RC3_01_12533.mzXML	TRUE	2005-12-16	marine metagenome	GAZ:United States of America	1552_001C3_RC3_01_12533.mzXML	0	HI16DEC05 Lyngbya majuscula	FALSE	0	ENVO:marine biome	ENVO:sea water	ENVO:organic material	Lyngbya majuscula	B	TRUE	TRUE	Lyngbya majuscula	cyanobacteria	1552.001C3.RC3.01.12533	1117	19.4281	-155.917	UCSD	UCSDMI	TRUE	FALSE	completed	UCSD	cyanobacteria	408172	Cyanobacteria	HAWAII
10125.1552.001C4.RC4.01.12534.mzXML	0	1552_001C4_RC4_01_12534.mzXML	TRUE	2005-12-16	marine metagenome	GAZ:United States of America	1552_001C4_RC4_01_12534.mzXML	0	HI16DEC05 Lyngbya majuscula	FALSE	0	ENVO:marine biome	ENVO:sea water	ENVO:organic material	Lyngbya majuscula	C	TRUE	TRUE	Lyngbya majuscula	cyanobacteria	1552.001C4.RC4.01.12534	1117	19.4281	-155.917	UCSD	UCSDMI	TRUE	FALSE	completed	UCSD	cyanobacteria	408172	Cyanobacteria	HAWAII
10125.1552.001C6.RC6.01.12535.mzXML	0	1552_001C6_RC6_01_12535.mzXML	TRUE	2005-12-16	marine metagenome	GAZ:United States of America	1552_001C6_RC6_01_12535.mzXML	0	HI16DEC05 Lyngbya majuscula	FALSE	0	ENVO:marine biome	ENVO:sea water	ENVO:organic material	Lyngbya majuscula	E	TRUE	TRUE	Lyngbya majuscula	cyanobacteria	1552.001C6.RC6.01.12535	1117	19.4281	-155.917	UCSD	UCSDMI	TRUE	FALSE	completed	UCSD	cyanobacteria	408172	Cyanobacteria	HAWAII
10125.1552.001C7.RC7.01.12536.mzXML	0	1552_001C7_RC7_01_12536.mzXML	TRUE	2005-12-16	marine metagenome	GAZ:United States of America	1552_001C7_RC7_01_12536.mzXML	0	HI16DEC05 Lyngbya majuscula	FALSE	0	ENVO:marine biome	ENVO:sea water	ENVO:organic material	Lyngbya majuscula	F	TRUE	TRUE	Lyngbya majuscula	cyanobacteria	1552.001C7.RC7.01.12536	1117	19.4281	-155.917	UCSD	UCSDMI	TRUE	FALSE	completed	UCSD	cyanobacteria	408172	Cyanobacteria	HAWAII
10125.1552.001C8.RC8.01.12537.mzXML	0	1552_001C8_RC8_01_12537.mzXML	TRUE	2005-12-16	marine metagenome	GAZ:United States of America	1552_001C8_RC8_01_12537.mzXML	0	HI16DEC05 Lyngbya majuscula	FALSE	0	ENVO:marine biome	ENVO:sea water	ENVO:organic material	Lyngbya majuscula	G	TRUE	TRUE	Lyngbya majuscula	cyanobacteria	1552.001C8.RC8.01.12537	1117	19.4281	-155.917	UCSD	UCSDMI	TRUE	FALSE	completed	UCSD	cyanobacteria	408172	Cyanobacteria	HAWAII
10125.1552.001C9.RC9.01.12538.mzXML	0	1552_001C9_RC9_01_12538.mzXML	TRUE	2005-12-16	marine metagenome	GAZ:United States of America	1552_001C9_RC9_01_12538.mzXML	0	HI16DEC05 Lyngbya majuscula	FALSE	0	ENVO:marine biome	ENVO:sea water	ENVO:organic material	Lyngbya majuscula	H	TRUE	TRUE	Lyngbya majuscula	cyanobacteria	1552.001C9.RC9.01.12538	1117	19.4281	-155.917	UCSD	UCSDMI	TRUE	FALSE	completed	UCSD	cyanobacteria	408172	Cyanobacteria	HAWAII
10125.1873.022G10.GG10.01.14721.mzXML	0	1873_022G10_GG10_01_14721.mzXML	TRUE	nan	marine metagenome	GAZ:United States of America	1873_022G10_GG10_01_14721.mzXML	0	Hanaunau.Bay.Hawaii Leptolyngbya	FALSE	0	ENVO:marine biome	ENVO:sea water	ENVO:organic material	Leptolyngbya	Crude	TRUE	TRUE	Leptolyngbya	cyanobacteria	1873.022G10.GG10.01.14721	1117	19.425	-155.917	UCSD	UCSDMI	TRUE	FALSE	completed	UCSD	cyanobacteria	408172	Cyanobacteria	HAWAII
10125.1873.022G11.GG11.01.14722.mzXML	0	1873_022G11_GG11_01_14722.mzXML	TRUE	nan	marine metagenome	GAZ:United States of America	1873_022G11_GG11_01_14722.mzXML	0	Hanaunau.Bay.Hawaii Leptolyngbya	FALSE	0	ENVO:marine biome	ENVO:sea water	ENVO:organic material	Leptolyngbya	A	TRUE	TRUE	Leptolyngbya	cyanobacteria	1873.022G11.GG11.01.14722	1117	19.425	-155.917	UCSD	UCSDMI	TRUE	FALSE	completed	UCSD	cyanobacteria	408172	Cyanobacteria	HAWAII
10125.1873.022H1.GH1.01.14723.mzXML	0	1873_022H1_GH1_01_14723.mzXML	TRUE	nan	marine metagenome	GAZ:United States of America	1873_022H1_GH1_01_14723.mzXML	0	Hanaunau.Bay.Hawaii Leptolyngbya	FALSE	0	ENVO:marine biome	ENVO:sea water	ENVO:organic material	Leptolyngbya	B	TRUE	TRUE	Leptolyngbya	cyanobacteria	1873.022H1.GH1.01.14723	1117	19.425	-155.917	UCSD	UCSDMI	TRUE	FALSE	completed	UCSD	cyanobacteria	408172	Cyanobacteria	HAWAII
10125.1873.022H2.GH2.01.14724.mzXML	0	1873_022H2_GH2_01_14724.mzXML	TRUE	nan	marine metagenome	GAZ:United States of America	1873_022H2_GH2_01_14724.mzXML	0	Hanaunau.Bay.Hawaii Leptolyngbya	FALSE	0	ENVO:marine biome	ENVO:sea water	ENVO:organic material	Leptolyngbya	C	TRUE	TRUE	Leptolyngbya	cyanobacteria	1873.022H2.GH2.01.14724	1117	19.425	-155.917	UCSD	UCSDMI	TRUE	FALSE	completed	UCSD	cyanobacteria	408172	Cyanobacteria	HAWAII
10125.1873.022H3.GH3.01.14725.mzXML	0	1873_022H3_GH3_01_14725.mzXML	TRUE	nan	marine metagenome	GAZ:United States of America	1873_022H3_GH3_01_14725.mzXML	0	Hanaunau.Bay.Hawaii Leptolyngbya	FALSE	0	ENVO:marine biome	ENVO:sea water	ENVO:organic material	Leptolyngbya	D	TRUE	TRUE	Leptolyngbya	cyanobacteria	1873.022H3.GH3.01.14725	1117	19.425	-155.917	UCSD	UCSDMI	TRUE	FALSE	completed	UCSD	cyanobacteria	408172	Cyanobacteria	HAWAII
10125.1873.022H4.GH4.01.14726.mzXML	0	1873_022H4_GH4_01_14726.mzXML	TRUE	nan	marine metagenome	GAZ:United States of America	1873_022H4_GH4_01_14726.mzXML	0	Hanaunau.Bay.Hawaii Leptolyngbya	FALSE	0	ENVO:marine biome	ENVO:sea water	ENVO:organic material	Leptolyngbya	E	TRUE	TRUE	Leptolyngbya	cyanobacteria	1873.022H4.GH4.01.14726	1117	19.425	-155.917	UCSD	UCSDMI	TRUE	FALSE	completed	UCSD	cyanobacteria	408172	Cyanobacteria	HAWAII
10125.1873.022H5.GH5.01.14727.mzXML	0	1873_022H5_GH5_01_14727.mzXML	TRUE	nan	marine metagenome	GAZ:United States of America	1873_022H5_GH5_01_14727.mzXML	0	Hanaunau.Bay.Hawaii Leptolyngbya	FALSE	0	ENVO:marine biome	ENVO:sea water	ENVO:organic material	Leptolyngbya	F	TRUE	TRUE	Leptolyngbya	cyanobacteria	1873.022H5.GH5.01.14727	1117	19.425	-155.917	UCSD	UCSDMI	TRUE	FALSE	completed	UCSD	cyanobacteria	408172	Cyanobacteria	HAWAII
10125.1873.022H6.GH6.01.14728.mzXML	0	1873_022H6_GH6_01_14728.mzXML	TRUE	nan	marine metagenome	GAZ:United States of America	1873_022H6_GH6_01_14728.mzXML	0	Hanaunau.Bay.Hawaii Leptolyngbya	FALSE	0	ENVO:marine biome	ENVO:sea water	ENVO:organic material	Leptolyngbya	G	TRUE	TRUE	Leptolyngbya	cyanobacteria	1873.022H6.GH6.01.14728	1117	19.425	-155.917	UCSD	UCSDMI	TRUE	FALSE	completed	UCSD	cyanobacteria	408172	Cyanobacteria	HAWAII
10125.1873.022H7.GH7.01.14729.mzXML	0	1873_022H7_GH7_01_14729.mzXML	TRUE	nan	marine metagenome	GAZ:United States of America	1873_022H7_GH7_01_14729.mzXML	0	Hanaunau.Bay.Hawaii Leptolyngbya	FALSE	0	ENVO:marine biome	ENVO:sea water	ENVO:organic material	Leptolyngbya	H	TRUE	TRUE	Leptolyngbya	cyanobacteria	1873.022H7.GH7.01.14729	1117	19.425	-155.917	UCSD	UCSDMI	TRUE	FALSE	completed	UCSD	cyanobacteria	408172	Cyanobacteria	HAWAII
10125.1873.022H8.GH8.01.14730.mzXML	0	1873_022H8_GH8_01_14730.mzXML	TRUE	nan	marine metagenome	GAZ:United States of America	1873_022H8_GH8_01_14730.mzXML	0	Hanaunau.Bay.Hawaii Leptolyngbya	FALSE	0	ENVO:marine biome	ENVO:sea water	ENVO:organic material	Leptolyngbya	I	TRUE	TRUE	Leptolyngbya	cyanobacteria	1873.022H8.GH8.01.14730	1117	19.425	-155.917	UCSD	UCSDMI	TRUE	FALSE	completed	UCSD	cyanobacteria	408172	Cyanobacteria	HAWAII
10125.1865.022A10.GA10.01.14647.mzXML	0	1865_022A10_GA10_01_14647.mzXML	TRUE	2008-12-20	marine metagenome	GAZ:Curacao	1865_022A10_GA10_01_14647.mzXML	0	NAC20DEC08.1 Lyngbya	FALSE	0	ENVO:marine biome	ENVO:sea water	ENVO:organic material	Lyngbya	C	TRUE	TRUE	Lyngbya	cyanobacteria	1865.022A10.GA10.01.14647	1117	12.076	-68.8664	UCSD	UCSDMI	TRUE	FALSE	completed	UCSD	cyanobacteria	408172	Cyanobacteria	NAC
10125.1865.022A11.GA11.01.14648.mzXML	0	1865_022A11_GA11_01_14648.mzXML	TRUE	2008-12-20	marine metagenome	GAZ:Curacao	1865_022A11_GA11_01_14648.mzXML	0	NAC20DEC08.1 Lyngbya	FALSE	0	ENVO:marine biome	ENVO:sea water	ENVO:organic material	Lyngbya	D	TRUE	TRUE	Lyngbya	cyanobacteria	1865.022A11.GA11.01.14648	1117	12.076	-68.8664	UCSD	UCSDMI	TRUE	FALSE	completed	UCSD	cyanobacteria	408172	Cyanobacteria	NAC
10125.1865.022A7.GA7.01.14644.mzXML	0	1865_022A7_GA7_01_14644.mzXML	TRUE	2008-12-20	marine metagenome	GAZ:Curacao	1865_022A7_GA7_01_14644.mzXML	0	NAC20DEC08.1 Lyngbya	FALSE	0	ENVO:marine biome	ENVO:sea water	ENVO:organic material	Lyngbya	Crude	TRUE	TRUE	Lyngbya	cyanobacteria	1865.022A7.GA7.01.14644	1117	12.076	-68.8664	UCSD	UCSDMI	TRUE	FALSE	completed	UCSD	cyanobacteria	408172	Cyanobacteria	NAC
10125.1865.022A8.GA8.01.14645.mzXML	0	1865_022A8_GA8_01_14645.mzXML	TRUE	2008-12-20	marine metagenome	GAZ:Curacao	1865_022A8_GA8_01_14645.mzXML	0	NAC20DEC08.1 Lyngbya	FALSE	0	ENVO:marine biome	ENVO:sea water	ENVO:organic material	Lyngbya	A	TRUE	TRUE	Lyngbya	cyanobacteria	1865.022A8.GA8.01.14645	1117	12.076	-68.8664	UCSD	UCSDMI	TRUE	FALSE	completed	UCSD	cyanobacteria	408172	Cyanobacteria	NAC
10125.1865.022A9.GA9.01.14646.mzXML	0	1865_022A9_GA9_01_14646.mzXML	TRUE	2008-12-20	marine metagenome	GAZ:Curacao	1865_022A9_GA9_01_14646.mzXML	0	NAC20DEC08.1 Lyngbya	FALSE	0	ENVO:marine biome	ENVO:sea water	ENVO:organic material	Lyngbya	B	TRUE	TRUE	Lyngbya	cyanobacteria	1865.022A9.GA9.01.14646	1117	12.076	-68.8664	UCSD	UCSDMI	TRUE	FALSE	completed	UCSD	cyanobacteria	408172	Cyanobacteria	NAC
10125.1865.022B1.GB1.01.14649.mzXML	0	1865_022B1_GB1_01_14649.mzXML	TRUE	2008-12-20	marine metagenome	GAZ:Curacao	1865_022B1_GB1_01_14649.mzXML	0	NAC20DEC08.1 Lyngbya	FALSE	0	ENVO:marine biome	ENVO:sea water	ENVO:organic material	Lyngbya	E	TRUE	TRUE	Lyngbya	cyanobacteria	1865.022B1.GB1.01.14649	1117	12.076	-68.8664	UCSD	UCSDMI	TRUE	FALSE	completed	UCSD	cyanobacteria	408172	Cyanobacteria	NAC
10125.1865.022B2.GB2.01.14650.mzXML	0	1865_022B2_GB2_01_14650.mzXML	TRUE	2008-12-20	marine metagenome	GAZ:Curacao	1865_022B2_GB2_01_14650.mzXML	0	NAC20DEC08.1 Lyngbya	FALSE	0	ENVO:marine biome	ENVO:sea water	ENVO:organic material	Lyngbya	F	TRUE	TRUE	Lyngbya	cyanobacteria	1865.022B2.GB2.01.14650	1117	12.076	-68.8664	UCSD	UCSDMI	TRUE	FALSE	completed	UCSD	cyanobacteria	408172	Cyanobacteria	NAC
10125.1865.022B3.GB3.01.14651.mzXML	0	1865_022B3_GB3_01_14651.mzXML	TRUE	2008-12-20	marine metagenome	GAZ:Curacao	1865_022B3_GB3_01_14651.mzXML	0	NAC20DEC08.1 Lyngbya	FALSE	0	ENVO:marine biome	ENVO:sea water	ENVO:organic material	Lyngbya	G	TRUE	TRUE	Lyngbya	cyanobacteria	1865.022B3.GB3.01.14651	1117	12.076	-68.8664	UCSD	UCSDMI	TRUE	FALSE	completed	UCSD	cyanobacteria	408172	Cyanobacteria	NAC
10125.1865.022B4.GB4.01.14652.mzXML	0	1865_022B4_GB4_01_14652.mzXML	TRUE	2008-12-20	marine metagenome	GAZ:Curacao	1865_022B4_GB4_01_14652.mzXML	0	NAC20DEC08.1 Lyngbya	FALSE	0	ENVO:marine biome	ENVO:sea water	ENVO:organic material	Lyngbya	H	TRUE	TRUE	Lyngbya	cyanobacteria	1865.022B4.GB4.01.14652	1117	12.076	-68.8664	UCSD	UCSDMI	TRUE	FALSE	completed	UCSD	cyanobacteria	408172	Cyanobacteria	NAC
10125.1865.022B5.GB5.01.14653.mzXML	0	1865_022B5_GB5_01_14653.mzXML	TRUE	2008-12-20	marine metagenome	GAZ:Curacao	1865_022B5_GB5_01_14653.mzXML	0	NAC20DEC08.1 Lyngbya	FALSE	0	ENVO:marine biome	ENVO:sea water	ENVO:organic material	Lyngbya	I	TRUE	TRUE	Lyngbya	cyanobacteria	1865.022B5.GB5.01.14653	1117	12.076	-68.8664	UCSD	UCSDMI	TRUE	FALSE	completed	UCSD	cyanobacteria	408172	Cyanobacteria	NAC
10125.1896.024D4.GD4.01.14890.mzXML	0	1896_024D4_GD4_01_14890.mzXML	TRUE	2008-12-16	marine metagenome	GAZ:Curacao	1896_024D4_GD4_01_14890.mzXML	0	NAC16DEC08.1 Red Macro	FALSE	0	ENVO:marine biome	ENVO:sea water	ENVO:organic material	Red Macro	Crude	TRUE	TRUE	Red Macro	red algae	1896.024D4.GD4.01.14890	2763	32.8427	-117.258	UCSD	UCSDMI	TRUE	FALSE	completed	UCSD	cyanobacteria	408172	Cyanobacteria	NAC
10125.1908.029D8.RD8.01.15436.mzXML	0	1908_029D8_RD8_01_15436.mzXML	TRUE	2008-12-12	marine metagenome	GAZ:Curacao	1908_029D8_RD8_01_15436.mzXML	0	NAC12DEC08.4 Schizothrix	FALSE	0	ENVO:marine biome	ENVO:sea water	ENVO:organic material	Schizothrix	Crude	TRUE	TRUE	Schizothrix	cyanobacteria	1908.029D8.RD8.01.15436	1117	12.1231	-68.9693	UCSD	UCSDMI	TRUE	FALSE	completed	UCSD	cyanobacteria	408172	Cyanobacteria	NAC
10125.1922.025H7.RH7.01.15052.mzXML	0	1922_025H7_RH7_01_15052.mzXML	TRUE	2008-12-20	marine metagenome	GAZ:Curacao	1922_025H7_RH7_01_15052.mzXML	0	NAC20DEC08.3 Lyngbya	FALSE	0	ENVO:marine biome	ENVO:sea water	ENVO:organic material	Lyngbya	Crude	TRUE	TRUE	Lyngbya	cyanobacteria	1922.025H7.RH7.01.15052	1117	12.076	-68.8664	UCSD	UCSDMI	TRUE	FALSE	completed	UCSD	cyanobacteria	408172	Cyanobacteria	NAC
10125.A1842.020F4.GF4.01.14501.mzXML	0	A1842_020F4_GF4_01_14501.mzXML	TRUE	nan	marine metagenome	GAZ:Panama	A1842_020F4_GF4_01_14501.mzXML	0	0 0	FALSE	0	ENVO:marine biome	ENVO:sea water	ENVO:organic material	other	other	TRUE	TRUE	other	other	A1842.020F4.GF4.01.14501	408172	32.8427	-117.258	UCSD	UCSDMI	TRUE	FALSE	completed	UCSD	cyanobacteria	408172	Cyanobacteria	OTHER
10125.A1843.020G3.GG3.01.14511.mzXML	0	A1843_020G3_GG3_01_14511.mzXML	TRUE	nan	marine metagenome	GAZ:Panama	A1843_020G3_GG3_01_14511.mzXML	0	0 0	FALSE	0	ENVO:marine biome	ENVO:sea water	ENVO:organic material	other	other	TRUE	TRUE	other	other	A1843.020G3.GG3.01.14511	408172	32.8427	-117.258	UCSD	UCSDMI	TRUE	FALSE	completed	UCSD	cyanobacteria	408172	Cyanobacteria	OTHER
10125.A1843.020G4.GG4.01.14512.mzXML	0	A1843_020G4_GG4_01_14512.mzXML	TRUE	nan	marine metagenome	GAZ:Panama	A1843_020G4_GG4_01_14512.mzXML	0	0 0	FALSE	0	ENVO:marine biome	ENVO:sea water	ENVO:organic material	other	other	TRUE	TRUE	other	other	A1843.020G4.GG4.01.14512	408172	32.8427	-117.258	UCSD	UCSDMI	TRUE	FALSE	completed	UCSD	cyanobacteria	408172	Cyanobacteria	OTHER
10125.A1843.020G5.GG5.01.14513.mzXML	0	A1843_020G5_GG5_01_14513.mzXML	TRUE	nan	marine metagenome	GAZ:Panama	A1843_020G5_GG5_01_14513.mzXML	0	0 0	FALSE	0	ENVO:marine biome	ENVO:sea water	ENVO:organic material	other	other	TRUE	TRUE	other	other	A1843.020G5.GG5.01.14513	408172	32.8427	-117.258	UCSD	UCSDMI	TRUE	FALSE	completed	UCSD	cyanobacteria	408172	Cyanobacteria	OTHER
10125.1550.001A2.RA2.01.12513.mzXML	0	1550_001A2_RA2_01_12513.mzXML	TRUE	nan	marine metagenome		1550_001A2_RA2_01_12513.mzXML	0	0 0	FALSE	0	ENVO:marine biome	ENVO:sea water	ENVO:organic material	other	other	TRUE	TRUE	other	other	1550.001A2.RA2.01.12513	408172	32.8427	-117.258	UCSD	UCSDMI	TRUE	FALSE	completed	UCSD	cyanobacteria	408172	Cyanobacteria	OTHER
10125.1557.001G10.RG10.01.12575.mzXML	0	1557_001G10_RG10_01_12575.mzXML	TRUE	nan	marine metagenome		1557_001G10_RG10_01_12575.mzXML	0	0 0	FALSE	0	ENVO:marine biome	ENVO:sea water	ENVO:organic material	other	other	TRUE	TRUE	other	other	1557.001G10.RG10.01.12575	408172	32.8427	-117.258	UCSD	UCSDMI	TRUE	FALSE	completed	UCSD	cyanobacteria	408172	Cyanobacteria	OTHER
10125.1557.001G9.RG9.01.12574.mzXML	0	1557_001G9_RG9_01_12574.mzXML	TRUE	nan	marine metagenome		1557_001G9_RG9_01_12574.mzXML	0	0 0	FALSE	0	ENVO:marine biome	ENVO:sea water	ENVO:organic material	other	other	TRUE	TRUE	other	other	1557.001G9.RG9.01.12574	408172	32.8427	-117.258	UCSD	UCSDMI	TRUE	FALSE	completed	UCSD	cyanobacteria	408172	Cyanobacteria	OTHER
10125.1558.001H7.RH7.01.12585.mzXML	0	1558_001H7_RH7_01_12585.mzXML	TRUE	nan	marine metagenome		1558_001H7_RH7_01_12585.mzXML	0	0 0	FALSE	0	ENVO:marine biome	ENVO:sea water	ENVO:organic material	other	other	TRUE	TRUE	other	other	1558.001H7.RH7.01.12585	408172	32.8427	-117.258	UCSD	UCSDMI	TRUE	FALSE	completed	UCSD	cyanobacteria	408172	Cyanobacteria	OTHER
10125.1558.001H8.2.RH8.01.12587.mzXML	0	1558_001H8_2_RH8_01_12587.mzXML	TRUE	nan	marine metagenome		1558_001H8_2_RH8_01_12587.mzXML	0	0 0	FALSE	0	ENVO:marine biome	ENVO:sea water	ENVO:organic material	other	other	TRUE	TRUE	other	other	1558.001H8.2.RH8.01.12587	408172	32.8427	-117.258	UCSD	UCSDMI	TRUE	FALSE	completed	UCSD	cyanobacteria	408172	Cyanobacteria	OTHER
10125.1622.007A4.RA4.01.13104.mzXML	0	1622_007A4_RA4_01_13104.mzXML	TRUE	nan	marine metagenome		1622_007A4_RA4_01_13104.mzXML	0	Schizothrix sp.	FALSE	0	ENVO:marine biome	ENVO:sea water	ENVO:organic material	Schizothrix sp.	Crude	TRUE	TRUE	Schizothrix sp.	cyanobacteria	1622.007A4.RA4.01.13104	1117	32.8427	-117.258	UCSD	UCSDMI	TRUE	FALSE	completed	UCSD	cyanobacteria	408172	Cyanobacteria	OTHER
10125.1646.008E10.GE10.01.15644.mzXML	0	1646_008E10_GE10_01_15644.mzXML	TRUE	nan	marine metagenome		1646_008E10_GE10_01_15644.mzXML	0	In house Culture Phormidium	FALSE	0	ENVO:marine biome	ENVO:sea water	ENVO:organic material	Phormidium	H	TRUE	TRUE	Phormidium	cyanobacteria	1646.008E10.GE10.01.15644	1117	-3.18439	119.945	UCSD	UCSDMI	TRUE	FALSE	completed	UCSD	cyanobacteria	408172	Cyanobacteria	OTHER
10125.1646.008E2.GE2.01.15635.mzXML	0	1646_008E2_GE2_01_15635.mzXML	TRUE	nan	marine metagenome		1646_008E2_GE2_01_15635.mzXML	0	In house Culture Phormidium	FALSE	0	ENVO:marine biome	ENVO:sea water	ENVO:organic material	Phormidium	Crude	TRUE	TRUE	Phormidium	cyanobacteria	1646.008E2.GE2.01.15635	1117	-3.18439	119.945	UCSD	UCSDMI	TRUE	FALSE	completed	UCSD	cyanobacteria	408172	Cyanobacteria	OTHER
10125.1646.008E3.GE3.01.15636.mzXML	0	1646_008E3_GE3_01_15636.mzXML	TRUE	nan	marine metagenome		1646_008E3_GE3_01_15636.mzXML	0	In house Culture Phormidium	FALSE	0	ENVO:marine biome	ENVO:sea water	ENVO:organic material	Phormidium	A	TRUE	TRUE	Phormidium	cyanobacteria	1646.008E3.GE3.01.15636	1117	-3.18439	119.945	UCSD	UCSDMI	TRUE	FALSE	completed	UCSD	cyanobacteria	408172	Cyanobacteria	OTHER
10125.1646.008E4.GE4.01.15637.mzXML	0	1646_008E4_GE4_01_15637.mzXML	TRUE	nan	marine metagenome		1646_008E4_GE4_01_15637.mzXML	0	In house Culture Phormidium	FALSE	0	ENVO:marine biome	ENVO:sea water	ENVO:organic material	Phormidium	B	TRUE	TRUE	Phormidium	cyanobacteria	1646.008E4.GE4.01.15637	1117	-3.18439	119.945	UCSD	UCSDMI	TRUE	FALSE	completed	UCSD	cyanobacteria	408172	Cyanobacteria	OTHER
10125.1646.008E5.GE5.01.15638.mzXML	0	1646_008E5_GE5_01_15638.mzXML	TRUE	nan	marine metagenome		1646_008E5_GE5_01_15638.mzXML	0	In house Culture Phormidium	FALSE	0	ENVO:marine biome	ENVO:sea water	ENVO:organic material	Phormidium	C	TRUE	TRUE	Phormidium	cyanobacteria	1646.008E5.GE5.01.15638	1117	-3.18439	119.945	UCSD	UCSDMI	TRUE	FALSE	completed	UCSD	cyanobacteria	408172	Cyanobacteria	OTHER
10125.1646.008E6.GE6.01.15639.mzXML	0	1646_008E6_GE6_01_15639.mzXML	TRUE	nan	marine metagenome		1646_008E6_GE6_01_15639.mzXML	0	In house Culture Phormidium	FALSE	0	ENVO:marine biome	ENVO:sea water	ENVO:organic material	Phormidium	D	TRUE	TRUE	Phormidium	cyanobacteria	1646.008E6.GE6.01.15639	1117	-3.18439	119.945	UCSD	UCSDMI	TRUE	FALSE	completed	UCSD	cyanobacteria	408172	Cyanobacteria	OTHER
10125.1646.008E7.GE7.01.15640.mzXML	0	1646_008E7_GE7_01_15640.mzXML	TRUE	nan	marine metagenome		1646_008E7_GE7_01_15640.mzXML	0	In house Culture Phormidium	FALSE	0	ENVO:marine biome	ENVO:sea water	ENVO:organic material	Phormidium	E	TRUE	TRUE	Phormidium	cyanobacteria	1646.008E7.GE7.01.15640	1117	-3.18439	119.945	UCSD	UCSDMI	TRUE	FALSE	completed	UCSD	cyanobacteria	408172	Cyanobacteria	OTHER
10125.1646.008E8.GE8.01.15641.mzXML	0	1646_008E8_GE8_01_15641.mzXML	TRUE	nan	marine metagenome		1646_008E8_GE8_01_15641.mzXML	0	In house Culture Phormidium	FALSE	0	ENVO:marine biome	ENVO:sea water	ENVO:organic material	Phormidium	F	TRUE	TRUE	Phormidium	cyanobacteria	1646.008E8.GE8.01.15641	1117	-3.18439	119.945	UCSD	UCSDMI	TRUE	FALSE	completed	UCSD	cyanobacteria	408172	Cyanobacteria	OTHER
10125.1646.008E9.GE9.01.15643.mzXML	0	1646_008E9_GE9_01_15643.mzXML	TRUE	nan	marine metagenome		1646_008E9_GE9_01_15643.mzXML	0	In house Culture Phormidium	FALSE	0	ENVO:marine biome	ENVO:sea water	ENVO:organic material	Phormidium	G	TRUE	TRUE	Phormidium	cyanobacteria	1646.008E9.GE9.01.15643	1117	-3.18439	119.945	UCSD	UCSDMI	TRUE	FALSE	completed	UCSD	cyanobacteria	408172	Cyanobacteria	OTHER
10125.1652.009B10.RB10.01.13327.mzXML	0	1652_009B10_RB10_01_13327.mzXML	TRUE	2006-04-11	marine metagenome		1652_009B10_RB10_01_13327.mzXML	0	LAJOLLA11APR06 Laurencia	FALSE	0	ENVO:marine biome	ENVO:sea water	ENVO:organic material	Laurencia	G	TRUE	TRUE	Laurencia	red algae	1652.009B10.RB10.01.13327	2763	32.8427	-117.258	UCSD	UCSDMI	TRUE	FALSE	completed	UCSD	cyanobacteria	408172	Cyanobacteria	OTHER
10125.1652.009B11.RB11.01.13328.mzXML	0	1652_009B11_RB11_01_13328.mzXML	TRUE	OLLA11APR06	marine metagenome		1652_009B11_RB11_01_13328.mzXML	0	LAJOLLA11APR06 Laurencia	FALSE	0	ENVO:marine biome	ENVO:sea water	ENVO:organic material	Laurencia	H	TRUE	TRUE	Laurencia	red algae	1652.009B11.RB11.01.13328	2763	32.8427	-117.258	UCSD	UCSDMI	TRUE	FALSE	completed	UCSD	cyanobacteria	408172	Cyanobacteria	OTHER
10125.1652.009B3.RB3.01.13320.mzXML	0	1652_009B3_RB3_01_13320.mzXML	TRUE	nan	marine metagenome		1652_009B3_RB3_01_13320.mzXML	0	LAJOLLA11APR06 Laurencia	FALSE	0	ENVO:marine biome	ENVO:sea water	ENVO:organic material	Laurencia	Crude	TRUE	TRUE	Laurencia	red algae	1652.009B3.RB3.01.13320	2763	32.8427	-117.258	UCSD	UCSDMI	TRUE	FALSE	completed	UCSD	cyanobacteria	408172	Cyanobacteria	OTHER
10125.1652.009B4.RB4.01.13321.mzXML	0	1652_009B4_RB4_01_13321.mzXML	TRUE	2006-04-11	marine metagenome		1652_009B4_RB4_01_13321.mzXML	0	LAJOLLA11APR06 Laurencia	FALSE	0	ENVO:marine biome	ENVO:sea water	ENVO:organic material	Laurencia	A	TRUE	TRUE	Laurencia	red algae	1652.009B4.RB4.01.13321	2763	32.8427	-117.258	UCSD	UCSDMI	TRUE	FALSE	completed	UCSD	cyanobacteria	408172	Cyanobacteria	OTHER
10125.1652.009B5.RB5.01.13322.mzXML	0	1652_009B5_RB5_01_13322.mzXML	TRUE	2006-04-11	marine metagenome		1652_009B5_RB5_01_13322.mzXML	0	LAJOLLA11APR06 Laurencia	FALSE	0	ENVO:marine biome	ENVO:sea water	ENVO:organic material	Laurencia	B	TRUE	TRUE	Laurencia	red algae	1652.009B5.RB5.01.13322	2763	32.8427	-117.258	UCSD	UCSDMI	TRUE	FALSE	completed	UCSD	cyanobacteria	408172	Cyanobacteria	OTHER
10125.1652.009B6.RB6.01.13323.mzXML	0	1652_009B6_RB6_01_13323.mzXML	TRUE	2006-04-11	marine metagenome		1652_009B6_RB6_01_13323.mzXML	0	LAJOLLA11APR06 Laurencia	FALSE	0	ENVO:marine biome	ENVO:sea water	ENVO:organic material	Laurencia	C	TRUE	TRUE	Laurencia	red algae	1652.009B6.RB6.01.13323	2763	32.8427	-117.258	UCSD	UCSDMI	TRUE	FALSE	completed	UCSD	cyanobacteria	408172	Cyanobacteria	OTHER
10125.1652.009B7.RB7.01.13324.mzXML	0	1652_009B7_RB7_01_13324.mzXML	TRUE	2006-04-11	marine metagenome		1652_009B7_RB7_01_13324.mzXML	0	LAJOLLA11APR06 Laurencia	FALSE	0	ENVO:marine biome	ENVO:sea water	ENVO:organic material	Laurencia	D	TRUE	TRUE	Laurencia	red algae	1652.009B7.RB7.01.13324	2763	32.8427	-117.258	UCSD	UCSDMI	TRUE	FALSE	completed	UCSD	cyanobacteria	408172	Cyanobacteria	OTHER
10125.1652.009B8.RB8.01.13325.mzXML	0	1652_009B8_RB8_01_13325.mzXML	TRUE	2006-04-11	marine metagenome		1652_009B8_RB8_01_13325.mzXML	0	LAJOLLA11APR06 Laurencia	FALSE	0	ENVO:marine biome	ENVO:sea water	ENVO:organic material	Laurencia	E	TRUE	TRUE	Laurencia	red algae	1652.009B8.RB8.01.13325	2763	32.8427	-117.258	UCSD	UCSDMI	TRUE	FALSE	completed	UCSD	cyanobacteria	408172	Cyanobacteria	OTHER
10125.1652.009B9.RB9.01.13326.mzXML	0	1652_009B9_RB9_01_13326.mzXML	TRUE	2006-04-11	marine metagenome		1652_009B9_RB9_01_13326.mzXML	0	LAJOLLA11APR06 Laurencia	FALSE	0	ENVO:marine biome	ENVO:sea water	ENVO:organic material	Laurencia	F	TRUE	TRUE	Laurencia	red algae	1652.009B9.RB9.01.13326	2763	32.8427	-117.258	UCSD	UCSDMI	TRUE	FALSE	completed	UCSD	cyanobacteria	408172	Cyanobacteria	OTHER
10125.1652.009C1.RC1.01.13329.mzXML	0	1652_009C1_RC1_01_13329.mzXML	TRUE	2006-04-11	marine metagenome		1652_009C1_RC1_01_13329.mzXML	0	LAJOLLA11APR06 Laurencia	FALSE	0	ENVO:marine biome	ENVO:sea water	ENVO:organic material	Laurencia	I	TRUE	TRUE	Laurencia	red algae	1652.009C1.RC1.01.13329	2763	32.8427	-117.258	UCSD	UCSDMI	TRUE	FALSE	completed	UCSD	cyanobacteria	408172	Cyanobacteria	OTHER
10125.1703.1.011H5.RH5.01.13585.mzXML	0	1703_1_011H5_RH5_01_13585.mzXML	TRUE	nan	marine metagenome		1703_1_011H5_RH5_01_13585.mzXML	0	DMSO Phormidium Culture Experiment Phormidium	FALSE	0	ENVO:marine biome	ENVO:sea water	ENVO:organic material	Phormidium	1/1/1703	TRUE	TRUE	Phormidium	cyanobacteria	1703.1.011H5.RH5.01.13585	1117	32.8427	-117.258	UCSD	UCSDMI	TRUE	FALSE	completed	UCSD	cyanobacteria	408172	Cyanobacteria	OTHER
10125.1703.2.011H6.RH6.01.13586.mzXML	0	1703_2_011H6_RH6_01_13586.mzXML	TRUE	nan	marine metagenome		1703_2_011H6_RH6_01_13586.mzXML	0	DMSO Phormidium Culture Experiment Phormidium	FALSE	0	ENVO:marine biome	ENVO:sea water	ENVO:organic material	Phormidium	2/1/1703	TRUE	TRUE	Phormidium	cyanobacteria	1703.2.011H6.RH6.01.13586	1117	32.8427	-117.258	UCSD	UCSDMI	TRUE	FALSE	completed	UCSD	cyanobacteria	408172	Cyanobacteria	OTHER
10125.1703.3.011H7.RH7.01.13587.mzXML	0	1703_3_011H7_RH7_01_13587.mzXML	TRUE	nan	marine metagenome		1703_3_011H7_RH7_01_13587.mzXML	0	DMSO Phormidium Culture Experiment Phormidium	FALSE	0	ENVO:marine biome	ENVO:sea water	ENVO:organic material	Phormidium	3/1/1703	TRUE	TRUE	Phormidium	cyanobacteria	1703.3.011H7.RH7.01.13587	1117	32.8427	-117.258	UCSD	UCSDMI	TRUE	FALSE	completed	UCSD	cyanobacteria	408172	Cyanobacteria	OTHER
10125.1703.4.011H8.RH8.01.13588.mzXML	0	1703_4_011H8_RH8_01_13588.mzXML	TRUE	nan	marine metagenome		1703_4_011H8_RH8_01_13588.mzXML	0	DMSO Phormidium Culture Experiment Phormidium	FALSE	0	ENVO:marine biome	ENVO:sea water	ENVO:organic material	Phormidium	4/1/1703	TRUE	TRUE	Phormidium	cyanobacteria	1703.4.011H8.RH8.01.13588	1117	32.8427	-117.258	UCSD	UCSDMI	TRUE	FALSE	completed	UCSD	cyanobacteria	408172	Cyanobacteria	OTHER
10125.1703.5.011H9.RH9.01.13589.mzXML	0	1703_5_011H9_RH9_01_13589.mzXML	TRUE	nan	marine metagenome		1703_5_011H9_RH9_01_13589.mzXML	0	DMSO Phormidium Culture Experiment Phormidium	FALSE	0	ENVO:marine biome	ENVO:sea water	ENVO:organic material	Phormidium	5/1/1703	TRUE	TRUE	Phormidium	cyanobacteria	1703.5.011H9.RH9.01.13589	1117	32.8427	-117.258	UCSD	UCSDMI	TRUE	FALSE	completed	UCSD	cyanobacteria	408172	Cyanobacteria	OTHER
10125.1703.6.011H10.RH10.01.13590.mzXML	0	1703_6_011H10_RH10_01_13590.mzXML	TRUE	nan	marine metagenome		1703_6_011H10_RH10_01_13590.mzXML	0	DMSO Phormidium Culture Experiment Phormidium	FALSE	0	ENVO:marine biome	ENVO:sea water	ENVO:organic material	Phormidium	6/1/1703	TRUE	TRUE	Phormidium	cyanobacteria	1703.6.011H10.RH10.01.13590	1117	32.8427	-117.258	UCSD	UCSDMI	TRUE	FALSE	completed	UCSD	cyanobacteria	408172	Cyanobacteria	OTHER
10125.1703.7.011H11.RH11.01.13591.mzXML	0	1703_7_011H11_RH11_01_13591.mzXML	TRUE	nan	marine metagenome		1703_7_011H11_RH11_01_13591.mzXML	0	DMSO Phormidium Culture Experiment Phormidium	FALSE	0	ENVO:marine biome	ENVO:sea water	ENVO:organic material	Phormidium	7/1/1703	TRUE	TRUE	Phormidium	cyanobacteria	1703.7.011H11.RH11.01.13591	1117	32.8427	-117.258	UCSD	UCSDMI	TRUE	FALSE	completed	UCSD	cyanobacteria	408172	Cyanobacteria	OTHER
10125.1703.8.012A1.GA1.01.13599.mzXML	0	1703_8_012A1_GA1_01_13599.mzXML	TRUE	nan	marine metagenome		1703_8_012A1_GA1_01_13599.mzXML	0	DMSO Phormidium Culture Experiment Phormidium	FALSE	0	ENVO:marine biome	ENVO:sea water	ENVO:organic material	Phormidium	8/1/1703	TRUE	TRUE	Phormidium	cyanobacteria	1703.8.012A1.GA1.01.13599	1117	32.8427	-117.258	UCSD	UCSDMI	TRUE	FALSE	completed	UCSD	cyanobacteria	408172	Cyanobacteria	OTHER
10125.1706.012A2.GA2.01.13601.mzXML	0	1706_012A2_GA2_01_13601.mzXML	TRUE	nan	marine metagenome		1706_012A2_GA2_01_13601.mzXML	0	unknown unknown	FALSE	0	ENVO:marine biome	ENVO:sea water	ENVO:organic material	other	Crude	TRUE	TRUE	other	other	1706.012A2.GA2.01.13601	408172	32.8427	-117.258	UCSD	UCSDMI	TRUE	FALSE	completed	UCSD	cyanobacteria	408172	Cyanobacteria	OTHER
10125.1706.012A3.GA3.01.13602.mzXML	0	1706_012A3_GA3_01_13602.mzXML	TRUE	nan	marine metagenome		1706_012A3_GA3_01_13602.mzXML	0	unknown unknown	FALSE	0	ENVO:marine biome	ENVO:sea water	ENVO:organic material	other	A	TRUE	TRUE	other	other	1706.012A3.GA3.01.13602	408172	32.8427	-117.258	UCSD	UCSDMI	TRUE	FALSE	completed	UCSD	cyanobacteria	408172	Cyanobacteria	OTHER
10125.1706.012A4.GA4.01.13603.mzXML	0	1706_012A4_GA4_01_13603.mzXML	TRUE	nan	marine metagenome		1706_012A4_GA4_01_13603.mzXML	0	unknown unknown	FALSE	0	ENVO:marine biome	ENVO:sea water	ENVO:organic material	other	B	TRUE	TRUE	other	other	1706.012A4.GA4.01.13603	408172	32.8427	-117.258	UCSD	UCSDMI	TRUE	FALSE	completed	UCSD	cyanobacteria	408172	Cyanobacteria	OTHER
10125.1706.012A5.GA5.01.13604.mzXML	0	1706_012A5_GA5_01_13604.mzXML	TRUE	nan	marine metagenome		1706_012A5_GA5_01_13604.mzXML	0	unknown unknown	FALSE	0	ENVO:marine biome	ENVO:sea water	ENVO:organic material	other	C	TRUE	TRUE	other	other	1706.012A5.GA5.01.13604	408172	32.8427	-117.258	UCSD	UCSDMI	TRUE	FALSE	completed	UCSD	cyanobacteria	408172	Cyanobacteria	OTHER
10125.1706.012A6.GA6.01.13605.mzXML	0	1706_012A6_GA6_01_13605.mzXML	TRUE	nan	marine metagenome		1706_012A6_GA6_01_13605.mzXML	0	unknown unknown	FALSE	0	ENVO:marine biome	ENVO:sea water	ENVO:organic material	other	D	TRUE	TRUE	other	other	1706.012A6.GA6.01.13605	408172	32.8427	-117.258	UCSD	UCSDMI	TRUE	FALSE	completed	UCSD	cyanobacteria	408172	Cyanobacteria	OTHER
10125.1706.012A7.GA7.01.13606.mzXML	0	1706_012A7_GA7_01_13606.mzXML	TRUE	nan	marine metagenome		1706_012A7_GA7_01_13606.mzXML	0	unknown unknown	FALSE	0	ENVO:marine biome	ENVO:sea water	ENVO:organic material	other	E	TRUE	TRUE	other	other	1706.012A7.GA7.01.13606	408172	32.8427	-117.258	UCSD	UCSDMI	TRUE	FALSE	completed	UCSD	cyanobacteria	408172	Cyanobacteria	OTHER
10125.1706.012A8.GA8.01.13607.mzXML	0	1706_012A8_GA8_01_13607.mzXML	TRUE	nan	marine metagenome		1706_012A8_GA8_01_13607.mzXML	0	unknown unknown	FALSE	0	ENVO:marine biome	ENVO:sea water	ENVO:organic material	other	G	TRUE	TRUE	other	other	1706.012A8.GA8.01.13607	408172	32.8427	-117.258	UCSD	UCSDMI	TRUE	FALSE	completed	UCSD	cyanobacteria	408172	Cyanobacteria	OTHER
10125.1706.012A9.GA9.01.13608.mzXML	0	1706_012A9_GA9_01_13608.mzXML	TRUE	nan	marine metagenome		1706_012A9_GA9_01_13608.mzXML	0	unknown unknown	FALSE	0	ENVO:marine biome	ENVO:sea water	ENVO:organic material	other	I	TRUE	TRUE	other	other	1706.012A9.GA9.01.13608	408172	32.8427	-117.258	UCSD	UCSDMI	TRUE	FALSE	completed	UCSD	cyanobacteria	408172	Cyanobacteria	OTHER
10125.1777.018B6.GB6.01.14239.mzXML	0	1777_018B6_GB6_01_14239.mzXML	TRUE	nan	marine metagenome		1777_018B6_GB6_01_14239.mzXML	0	FSP 29091 Cultured Phormidium	FALSE	0	ENVO:marine biome	ENVO:sea water	ENVO:organic material	Cultured Phormidium	Crude	TRUE	TRUE	Cultured Phormidium	cyanobacteria	1777.018B6.GB6.01.14239	1117	32.8427	-117.258	UCSD	UCSDMI	TRUE	FALSE	completed	UCSD	cyanobacteria	408172	Cyanobacteria	OTHER
10125.1778.018B7.GB7.01.14241.mzXML	0	1778_018B7_GB7_01_14241.mzXML	TRUE	nan	marine metagenome		1778_018B7_GB7_01_14241.mzXML	0	NPB 20D91.6 Cultured Phormidium	FALSE	0	ENVO:marine biome	ENVO:sea water	ENVO:organic material	Cultured Phormidium	Crude	TRUE	TRUE	Cultured Phormidium	cyanobacteria	1778.018B7.GB7.01.14241	1117	32.8427	-117.258	UCSD	UCSDMI	TRUE	FALSE	completed	UCSD	cyanobacteria	408172	Cyanobacteria	OTHER
10125.1779.018B8.GB8.01.14243.mzXML	0	1779_018B8_GB8_01_14243.mzXML	TRUE	nan	marine metagenome		1779_018B8_GB8_01_14243.mzXML	0	NWC1691.1.1 Cultured Lyngbya	FALSE	0	ENVO:marine biome	ENVO:sea water	ENVO:organic material	Cultured Lyngbya	crude	TRUE	TRUE	Cultured Lyngbya	cyanobacteria	1779.018B8.GB8.01.14243	1117	32.8427	-117.258	UCSD	UCSDMI	TRUE	FALSE	completed	UCSD	cyanobacteria	408172	Cyanobacteria	OTHER
10125.1781.018C6.GC6.01.14254.mzXML	0	1781_018C6_GC6_01_14254.mzXML	TRUE	1992-07-23	marine metagenome		1781_018C6_GC6_01_14254.mzXML	0	PHD23Jul92.1 Percursaria chlorophyte	FALSE	0	ENVO:marine biome	ENVO:sea water	ENVO:organic material	Percursaria chlorophyte	crude	TRUE	TRUE	Percursaria chlorophyte	cyanobacteria	1781.018C6.GC6.01.14254	408172	32.8427	-117.258	UCSD	UCSDMI	TRUE	FALSE	completed	UCSD	cyanobacteria	408172	Cyanobacteria	OTHER
10125.1785.018E1.GE1.01.14279.mzXML	0	1785_018E1_GE1_01_14279.mzXML	TRUE	nan	marine metagenome		1785_018E1_GE1_01_14279.mzXML	0	unknown Geoclaspa	FALSE	0	ENVO:marine biome	ENVO:sea water	ENVO:organic material	Geoclaspa	Crude	TRUE	TRUE	Geoclaspa	cyanobacteria	1785.018E1.GE1.01.14279	408172	32.8427	-117.258	UCSD	UCSDMI	TRUE	FALSE	completed	UCSD	cyanobacteria	408172	Cyanobacteria	OTHER
10125.1786.018E2.GE2.01.14281.mzXML	0	1786_018E2_GE2_01_14281.mzXML	TRUE	nan	marine metagenome		1786_018E2_GE2_01_14281.mzXML	0	PV3 Pluerocopsa	FALSE	0	ENVO:marine biome	ENVO:sea water	ENVO:organic material	Pluerocopsa	Crude	TRUE	TRUE	Pluerocopsa	cyanobacteria	1786.018E2.GE2.01.14281	1117	32.8427	-117.258	UCSD	UCSDMI	TRUE	FALSE	completed	UCSD	cyanobacteria	408172	Cyanobacteria	OTHER
10125.1789.018E4.GE4.01.14285.mzXML	0	1789_018E4_GE4_01_14285.mzXML	TRUE	nan	marine metagenome		1789_018E4_GE4_01_14285.mzXML	0	171 Isochrysis	FALSE	0	ENVO:marine biome	ENVO:sea water	ENVO:organic material	Isochrysis	Crude	TRUE	TRUE	Isochrysis	cyanobacteria	1789.018E4.GE4.01.14285	408172	32.8427	-117.258	UCSD	UCSDMI	TRUE	FALSE	completed	UCSD	cyanobacteria	408172	Cyanobacteria	OTHER
10125.1790.018E5.GE3.01.14287.mzXML	0	1790_018E5_GE3_01_14287.mzXML	TRUE	nan	marine metagenome		1790_018E5_GE3_01_14287.mzXML	0	Guam 3 Synechocystis	FALSE	0	ENVO:marine biome	ENVO:sea water	ENVO:organic material	Synechocystis	Crude	TRUE	TRUE	Synechocystis	cyanobacteria	1790.018E5.GE3.01.14287	1117	32.8427	-117.258	UCSD	UCSDMI	TRUE	FALSE	completed	UCSD	cyanobacteria	408172	Cyanobacteria	OTHER
10125.1791.018E6.GE6.01.14289.mzXML	0	1791_018E6_GE6_01_14289.mzXML	TRUE	nan	marine metagenome		1791_018E6_GE6_01_14289.mzXML	0	Brian's Cyano cyano	FALSE	0	ENVO:marine biome	ENVO:sea water	ENVO:organic material	cyano	Crude	TRUE	TRUE	cyano	cyanobacteria	1791.018E6.GE6.01.14289	1117	32.8427	-117.258	UCSD	UCSDMI	TRUE	FALSE	completed	UCSD	cyanobacteria	408172	Cyanobacteria	OTHER
10125.1792.018E7.GE7.01.14291.mzXML	0	1792_018E7_GE7_01_14291.mzXML	TRUE	nan	marine metagenome		1792_018E7_GE7_01_14291.mzXML	0	E1 Phormidium corium	FALSE	0	ENVO:marine biome	ENVO:sea water	ENVO:organic material	Phormidium corium	Crude	TRUE	TRUE	Phormidium corium	cyanobacteria	1792.018E7.GE7.01.14291	408172	32.8427	-117.258	UCSD	UCSDMI	TRUE	FALSE	completed	UCSD	cyanobacteria	408172	Cyanobacteria	OTHER
10125.1793.018E8.GE8.01.14293.mzXML	0	1793_018E8_GE8_01_14293.mzXML	TRUE	nan	marine metagenome		1793_018E8_GE8_01_14293.mzXML	0	E3 Ectocarpus siliculosus	FALSE	0	ENVO:marine biome	ENVO:sea water	ENVO:organic material	Ectocarpus siliculosus	Crude	TRUE	TRUE	Ectocarpus siliculosus	brown algae	1793.018E8.GE8.01.14293	2870	32.8427	-117.258	UCSD	UCSDMI	TRUE	FALSE	completed	UCSD	cyanobacteria	408172	Cyanobacteria	OTHER
10125.1794.018E9.GE9.01.14295.mzXML	0	1794_018E9_GE9_01_14295.mzXML	TRUE	nan	marine metagenome		1794_018E9_GE9_01_14295.mzXML	0	214 Phormidium PLP	FALSE	0	ENVO:marine biome	ENVO:sea water	ENVO:organic material	Phormidium PLP	Crude	TRUE	TRUE	Phormidium PLP	cyanobacteria	1794.018E9.GE9.01.14295	408172	32.8427	-117.258	UCSD	UCSDMI	TRUE	FALSE	completed	UCSD	cyanobacteria	408172	Cyanobacteria	OTHER
10125.1795.018E10.GE10.01.14297.mzXML	0	1795_018E10_GE10_01_14297.mzXML	TRUE	nan	marine metagenome		1795_018E10_GE10_01_14297.mzXML	0	174 Aphanothece	FALSE	0	ENVO:marine biome	ENVO:sea water	ENVO:organic material	Aphanothece	Crude	TRUE	TRUE	Aphanothece	cyanobacteria	1795.018E10.GE10.01.14297	1117	32.8427	-117.258	UCSD	UCSDMI	TRUE	FALSE	completed	UCSD	cyanobacteria	408172	Cyanobacteria	OTHER
10125.1796.018E11.GE11.01.14299.mzXML	0	1796_018E11_GE11_01_14299.mzXML	TRUE	nan	marine metagenome		1796_018E11_GE11_01_14299.mzXML	0	162 Phormidium	FALSE	0	ENVO:marine biome	ENVO:sea water	ENVO:organic material	Phormidium	Crude	TRUE	TRUE	Phormidium	cyanobacteria	1796.018E11.GE11.01.14299	1117	32.8427	-117.258	UCSD	UCSDMI	TRUE	FALSE	completed	UCSD	cyanobacteria	408172	Cyanobacteria	OTHER
10125.1801.018F11.GF11.01.14314.mzXML	0	1801_018F11_GF11_01_14314.mzXML	TRUE	nan	marine metagenome		1801_018F11_GF11_01_14314.mzXML	0	NA Cigarettes	FALSE	0	ENVO:marine biome	ENVO:sea water	ENVO:organic material	Cigarettes	Crude	TRUE	TRUE	Cigarettes	cyanobacteria	1801.018F11.GF11.01.14314	408172	32.8427	-117.258	UCSD	UCSDMI	TRUE	FALSE	completed	UCSD	cyanobacteria	408172	Cyanobacteria	OTHER
10125.1803.018G11.GG11.01.14328.mzXML	0	1803_018G11_GG11_01_14328.mzXML	TRUE	nan	marine metagenome		1803_018G11_GG11_01_14328.mzXML	0	35942 .reddish brown.	FALSE	0	ENVO:marine biome	ENVO:sea water	ENVO:organic material	reddish brown	Crude	TRUE	TRUE	reddish brown	red algae	1803.018G11.GG11.01.14328	2763	32.8427	-117.258	UCSD	UCSDMI	TRUE	FALSE	completed	UCSD	cyanobacteria	408172	Cyanobacteria	OTHER
10125.1803.018H1.GH1.01.14329.mzXML	0	1803_018H1_GH1_01_14329.mzXML	TRUE	nan	marine metagenome		1803_018H1_GH1_01_14329.mzXML	0	35942 .reddish brown.	FALSE	0	ENVO:marine biome	ENVO:sea water	ENVO:organic material	reddish brown	A	TRUE	TRUE	reddish brown	red algae	1803.018H1.GH1.01.14329	2763	32.8427	-117.258	UCSD	UCSDMI	TRUE	FALSE	completed	UCSD	cyanobacteria	408172	Cyanobacteria	OTHER
10125.1803.018H2.GH2.01.14330.mzXML	0	1803_018H2_GH2_01_14330.mzXML	TRUE	nan	marine metagenome		1803_018H2_GH2_01_14330.mzXML	0	35942 .reddish brown.	FALSE	0	ENVO:marine biome	ENVO:sea water	ENVO:organic material	reddish brown	B	TRUE	TRUE	reddish brown	red algae	1803.018H2.GH2.01.14330	2763	32.8427	-117.258	UCSD	UCSDMI	TRUE	FALSE	completed	UCSD	cyanobacteria	408172	Cyanobacteria	OTHER
10125.1803.018H3.GH3.01.14331.mzXML	0	1803_018H3_GH3_01_14331.mzXML	TRUE	nan	marine metagenome		1803_018H3_GH3_01_14331.mzXML	0	35942 .reddish brown.	FALSE	0	ENVO:marine biome	ENVO:sea water	ENVO:organic material	reddish brown	C	TRUE	TRUE	reddish brown	red algae	1803.018H3.GH3.01.14331	2763	32.8427	-117.258	UCSD	UCSDMI	TRUE	FALSE	completed	UCSD	cyanobacteria	408172	Cyanobacteria	OTHER
10125.1803.018H4.GH4.01.14332.mzXML	0	1803_018H4_GH4_01_14332.mzXML	TRUE	nan	marine metagenome		1803_018H4_GH4_01_14332.mzXML	0	35942 .reddish brown.	FALSE	0	ENVO:marine biome	ENVO:sea water	ENVO:organic material	reddish brown	D	TRUE	TRUE	reddish brown	red algae	1803.018H4.GH4.01.14332	2763	32.8427	-117.258	UCSD	UCSDMI	TRUE	FALSE	completed	UCSD	cyanobacteria	408172	Cyanobacteria	OTHER
10125.1803.018H5.GH5.01.14333.mzXML	0	1803_018H5_GH5_01_14333.mzXML	TRUE	nan	marine metagenome		1803_018H5_GH5_01_14333.mzXML	0	35942 .reddish brown.	FALSE	0	ENVO:marine biome	ENVO:sea water	ENVO:organic material	reddish brown	E	TRUE	TRUE	reddish brown	red algae	1803.018H5.GH5.01.14333	2763	32.8427	-117.258	UCSD	UCSDMI	TRUE	FALSE	completed	UCSD	cyanobacteria	408172	Cyanobacteria	OTHER
10125.1803.018H6.GH6.01.14334.mzXML	0	1803_018H6_GH6_01_14334.mzXML	TRUE	nan	marine metagenome		1803_018H6_GH6_01_14334.mzXML	0	35942 .reddish brown.	FALSE	0	ENVO:marine biome	ENVO:sea water	ENVO:organic material	reddish brown	F	TRUE	TRUE	reddish brown	red algae	1803.018H6.GH6.01.14334	2763	32.8427	-117.258	UCSD	UCSDMI	TRUE	FALSE	completed	UCSD	cyanobacteria	408172	Cyanobacteria	OTHER
10125.1803.018H7.GH7.01.14335.mzXML	0	1803_018H7_GH7_01_14335.mzXML	TRUE	nan	marine metagenome		1803_018H7_GH7_01_14335.mzXML	0	35942 .reddish brown.	FALSE	0	ENVO:marine biome	ENVO:sea water	ENVO:organic material	reddish brown	G	TRUE	TRUE	reddish brown	red algae	1803.018H7.GH7.01.14335	2763	32.8427	-117.258	UCSD	UCSDMI	TRUE	FALSE	completed	UCSD	cyanobacteria	408172	Cyanobacteria	OTHER
10125.1803.018H8.GH8.01.14336.mzXML	0	1803_018H8_GH8_01_14336.mzXML	TRUE	nan	marine metagenome		1803_018H8_GH8_01_14336.mzXML	0	35942 .reddish brown.	FALSE	0	ENVO:marine biome	ENVO:sea water	ENVO:organic material	reddish brown	H	TRUE	TRUE	reddish brown	red algae	1803.018H8.GH8.01.14336	2763	32.8427	-117.258	UCSD	UCSDMI	TRUE	FALSE	completed	UCSD	cyanobacteria	408172	Cyanobacteria	OTHER
10125.1803.018H9.GH9.01.14337.mzXML	0	1803_018H9_GH9_01_14337.mzXML	TRUE	nan	marine metagenome		1803_018H9_GH9_01_14337.mzXML	0	35942 .reddish brown.	FALSE	0	ENVO:marine biome	ENVO:sea water	ENVO:organic material	reddish brown	I	TRUE	TRUE	reddish brown	red algae	1803.018H9.GH9.01.14337	2763	32.8427	-117.258	UCSD	UCSDMI	TRUE	FALSE	completed	UCSD	cyanobacteria	408172	Cyanobacteria	OTHER
10125.1808.019C10.RC10.01.14377.mzXML	0	1808_019C10_RC10_01_14377.mzXML	TRUE	nan	marine metagenome		1808_019C10_RC10_01_14377.mzXML	0	HB.Cultures see lab notebook 3 Phormidium Cultures	FALSE	0	ENVO:marine biome	ENVO:sea water	ENVO:organic material	Phormidium Cultures	B	TRUE	TRUE	Phormidium Cultures	cyanobacteria	1808.019C10.RC10.01.14377	408172	32.8427	-117.258	UCSD	UCSDMI	TRUE	FALSE	completed	UCSD	cyanobacteria	408172	Cyanobacteria	OTHER
10125.1808.019C11.RC11.01.14378.mzXML	0	1808_019C11_RC11_01_14378.mzXML	TRUE	nan	marine metagenome		1808_019C11_RC11_01_14378.mzXML	0	HB.Cultures see lab notebook 3 Phormidium Cultures	FALSE	0	ENVO:marine biome	ENVO:sea water	ENVO:organic material	Phormidium Cultures	C	TRUE	TRUE	Phormidium Cultures	cyanobacteria	1808.019C11.RC11.01.14378	1117	32.8427	-117.258	UCSD	UCSDMI	TRUE	FALSE	completed	UCSD	cyanobacteria	408172	Cyanobacteria	OTHER
10125.1808.019C8.RC8.01.14375.mzXML	0	1808_019C8_RC8_01_14375.mzXML	TRUE	nan	marine metagenome		1808_019C8_RC8_01_14375.mzXML	0	HB.Cultures see lab notebook 3 Phormidium Cultures	FALSE	0	ENVO:marine biome	ENVO:sea water	ENVO:organic material	Phormidium Cultures	Crude	TRUE	TRUE	Phormidium Cultures	cyanobacteria	1808.019C8.RC8.01.14375	408172	32.8427	-117.258	UCSD	UCSDMI	TRUE	FALSE	completed	UCSD	cyanobacteria	408172	Cyanobacteria	OTHER
10125.1808.019C9.RC9.01.14376.mzXML	0	1808_019C9_RC9_01_14376.mzXML	TRUE	nan	marine metagenome		1808_019C9_RC9_01_14376.mzXML	0	HB.Cultures see lab notebook 3 Phormidium Cultures	FALSE	0	ENVO:marine biome	ENVO:sea water	ENVO:organic material	Phormidium Cultures	A	TRUE	TRUE	Phormidium Cultures	cyanobacteria	1808.019C9.RC9.01.14376	1117	32.8427	-117.258	UCSD	UCSDMI	TRUE	FALSE	completed	UCSD	cyanobacteria	408172	Cyanobacteria	OTHER
10125.1808.019D1.RD1.01.14379.mzXML	0	1808_019D1_RD1_01_14379.mzXML	TRUE	nan	marine metagenome		1808_019D1_RD1_01_14379.mzXML	0	HB.Cultures see lab notebook 3 Phormidium Cultures	FALSE	0	ENVO:marine biome	ENVO:sea water	ENVO:organic material	Phormidium Cultures	D	TRUE	TRUE	Phormidium Cultures	cyanobacteria	1808.019D1.RD1.01.14379	1117	32.8427	-117.258	UCSD	UCSDMI	TRUE	FALSE	completed	UCSD	cyanobacteria	408172	Cyanobacteria	OTHER
10125.1808.019D2.RD2.01.14380.mzXML	0	1808_019D2_RD2_01_14380.mzXML	TRUE	nan	marine metagenome		1808_019D2_RD2_01_14380.mzXML	0	HB.Cultures see lab notebook 3 Phormidium Cultures	FALSE	0	ENVO:marine biome	ENVO:sea water	ENVO:organic material	Phormidium Cultures	E	TRUE	TRUE	Phormidium Cultures	cyanobacteria	1808.019D2.RD2.01.14380	1117	32.8427	-117.258	UCSD	UCSDMI	TRUE	FALSE	completed	UCSD	cyanobacteria	408172	Cyanobacteria	OTHER
10125.1808.019D3.RD3.01.14381.mzXML	0	1808_019D3_RD3_01_14381.mzXML	TRUE	nan	marine metagenome		1808_019D3_RD3_01_14381.mzXML	0	HB.Cultures see lab notebook 3 Phormidium Cultures	FALSE	0	ENVO:marine biome	ENVO:sea water	ENVO:organic material	Phormidium Cultures	F	TRUE	TRUE	Phormidium Cultures	cyanobacteria	1808.019D3.RD3.01.14381	1117	32.8427	-117.258	UCSD	UCSDMI	TRUE	FALSE	completed	UCSD	cyanobacteria	408172	Cyanobacteria	OTHER
10125.1808.019D4.RD4.01.14382.mzXML	0	1808_019D4_RD4_01_14382.mzXML	TRUE	nan	marine metagenome		1808_019D4_RD4_01_14382.mzXML	0	HB.Cultures see lab notebook 3 Phormidium Cultures	FALSE	0	ENVO:marine biome	ENVO:sea water	ENVO:organic material	Phormidium Cultures	G	TRUE	TRUE	Phormidium Cultures	cyanobacteria	1808.019D4.RD4.01.14382	1117	32.8427	-117.258	UCSD	UCSDMI	TRUE	FALSE	completed	UCSD	cyanobacteria	408172	Cyanobacteria	OTHER
10125.1808.019D5.RD5.01.14383.mzXML	0	1808_019D5_RD5_01_14383.mzXML	TRUE	nan	marine metagenome		1808_019D5_RD5_01_14383.mzXML	0	HB.Cultures see lab notebook 3 Phormidium Cultures	FALSE	0	ENVO:marine biome	ENVO:sea water	ENVO:organic material	Phormidium Cultures	H	TRUE	TRUE	Phormidium Cultures	cyanobacteria	1808.019D5.RD5.01.14383	408172	32.8427	-117.258	UCSD	UCSDMI	TRUE	FALSE	completed	UCSD	cyanobacteria	408172	Cyanobacteria	OTHER
10125.1808.019D6.RD6.01.14384.mzXML	0	1808_019D6_RD6_01_14384.mzXML	TRUE	nan	marine metagenome		1808_019D6_RD6_01_14384.mzXML	0	HB.Cultures see lab notebook 3 Phormidium Cultures	FALSE	0	ENVO:marine biome	ENVO:sea water	ENVO:organic material	Phormidium Cultures	I	TRUE	TRUE	Phormidium Cultures	cyanobacteria	1808.019D6.RD6.01.14384	408172	32.8427	-117.258	UCSD	UCSDMI	TRUE	FALSE	completed	UCSD	cyanobacteria	408172	Cyanobacteria	OTHER
10125.1809.019D10.RD10.01.14389.mzXML	0	1809_019D10_RD10_01_14389.mzXML	TRUE	1997-09-10	marine metagenome		1809_019D10_RD10_01_14389.mzXML	0	NAK10SEP97.2 Lyngbya Majuscula	FALSE	0	ENVO:marine biome	ENVO:sea water	ENVO:organic material	Lyngbya Majuscula	D	TRUE	TRUE	Lyngbya Majuscula	cyanobacteria	1809.019D10.RD10.01.14389	1117	32.8427	-117.258	UCSD	UCSDMI	TRUE	FALSE	completed	UCSD	cyanobacteria	408172	Cyanobacteria	OTHER
10125.1809.019D11.RD11.01.14390.mzXML	0	1809_019D11_RD11_01_14390.mzXML	TRUE	1997-09-10	marine metagenome		1809_019D11_RD11_01_14390.mzXML	0	NAK10SEP97.2 Lyngbya Majuscula	FALSE	0	ENVO:marine biome	ENVO:sea water	ENVO:organic material	Lyngbya Majuscula	E	TRUE	TRUE	Lyngbya Majuscula	cyanobacteria	1809.019D11.RD11.01.14390	1117	32.8427	-117.258	UCSD	UCSDMI	TRUE	FALSE	completed	UCSD	cyanobacteria	408172	Cyanobacteria	OTHER
10125.1809.019D7.RD7.01.14386.mzXML	0	1809_019D7_RD7_01_14386.mzXML	TRUE	1997-09-10	marine metagenome		1809_019D7_RD7_01_14386.mzXML	0	NAK10SEP97.2 Lyngbya Majuscula	FALSE	0	ENVO:marine biome	ENVO:sea water	ENVO:organic material	Lyngbya Majuscula	A	TRUE	TRUE	Lyngbya Majuscula	cyanobacteria	1809.019D7.RD7.01.14386	1117	32.8427	-117.258	UCSD	UCSDMI	TRUE	FALSE	completed	UCSD	cyanobacteria	408172	Cyanobacteria	OTHER
10125.1809.019D8.RD8.01.14387.mzXML	0	1809_019D8_RD8_01_14387.mzXML	TRUE	1997-09-10	marine metagenome		1809_019D8_RD8_01_14387.mzXML	0	NAK10SEP97.2 Lyngbya Majuscula	FALSE	0	ENVO:marine biome	ENVO:sea water	ENVO:organic material	Lyngbya Majuscula	B	TRUE	TRUE	Lyngbya Majuscula	cyanobacteria	1809.019D8.RD8.01.14387	1117	32.8427	-117.258	UCSD	UCSDMI	TRUE	FALSE	completed	UCSD	cyanobacteria	408172	Cyanobacteria	OTHER
10125.1809.019D9.RD9.01.14388.mzXML	0	1809_019D9_RD9_01_14388.mzXML	TRUE	1997-09-10	marine metagenome		1809_019D9_RD9_01_14388.mzXML	0	NAK10SEP97.2 Lyngbya Majuscula	FALSE	0	ENVO:marine biome	ENVO:sea water	ENVO:organic material	Lyngbya Majuscula	C	TRUE	TRUE	Lyngbya Majuscula	cyanobacteria	1809.019D9.RD9.01.14388	1117	32.8427	-117.258	UCSD	UCSDMI	TRUE	FALSE	completed	UCSD	cyanobacteria	408172	Cyanobacteria	OTHER
10125.1809.019E1.RE1.01.14391.mzXML	0	1809_019E1_RE1_01_14391.mzXML	TRUE	1997-09-10	marine metagenome		1809_019E1_RE1_01_14391.mzXML	0	NAK10SEP97.2 Lyngbya Majuscula	FALSE	0	ENVO:marine biome	ENVO:sea water	ENVO:organic material	Lyngbya Majuscula	F	TRUE	TRUE	Lyngbya Majuscula	cyanobacteria	1809.019E1.RE1.01.14391	1117	32.8427	-117.258	UCSD	UCSDMI	TRUE	FALSE	completed	UCSD	cyanobacteria	408172	Cyanobacteria	OTHER
10125.1809.019E2.RE2.01.14392.mzXML	0	1809_019E2_RE2_01_14392.mzXML	TRUE	1997-09-10	marine metagenome		1809_019E2_RE2_01_14392.mzXML	0	NAK10SEP97.2 Lyngbya Majuscula	FALSE	0	ENVO:marine biome	ENVO:sea water	ENVO:organic material	Lyngbya Majuscula	G	TRUE	TRUE	Lyngbya Majuscula	cyanobacteria	1809.019E2.RE2.01.14392	1117	32.8427	-117.258	UCSD	UCSDMI	TRUE	FALSE	completed	UCSD	cyanobacteria	408172	Cyanobacteria	OTHER
10125.1809.019E3.RE3.01.14393.mzXML	0	1809_019E3_RE3_01_14393.mzXML	TRUE	1997-09-10	marine metagenome		1809_019E3_RE3_01_14393.mzXML	0	NAK10SEP97.2 Lyngbya Majuscula	FALSE	0	ENVO:marine biome	ENVO:sea water	ENVO:organic material	Lyngbya Majuscula	H	TRUE	TRUE	Lyngbya Majuscula	cyanobacteria	1809.019E3.RE3.01.14393	1117	32.8427	-117.258	UCSD	UCSDMI	TRUE	FALSE	completed	UCSD	cyanobacteria	408172	Cyanobacteria	OTHER
10125.1809.019E4.RE4.01.14394.mzXML	0	1809_019E4_RE4_01_14394.mzXML	TRUE	1997-09-10	marine metagenome		1809_019E4_RE4_01_14394.mzXML	0	NAK10SEP97.2 Lyngbya Majuscula	FALSE	0	ENVO:marine biome	ENVO:sea water	ENVO:organic material	Lyngbya Majuscula	I	TRUE	TRUE	Lyngbya Majuscula	cyanobacteria	1809.019E4.RE4.01.14394	1117	32.8427	-117.258	UCSD	UCSDMI	TRUE	FALSE	completed	UCSD	cyanobacteria	408172	Cyanobacteria	OTHER
10125.1810.019E10.RE10.01.14401.mzXML	0	1810_019E10_RE10_01_14401.mzXML	TRUE	2001-05-05	marine metagenome		1810_019E10_RE10_01_14401.mzXML	0	FOK05MAY01.1 Lyngbya	FALSE	0	ENVO:marine biome	ENVO:sea water	ENVO:organic material	Lyngbya	E	TRUE	TRUE	Lyngbya	cyanobacteria	1810.019E10.RE10.01.14401	1117	24.5507	-81.773	UCSD	UCSDMI	TRUE	FALSE	completed	UCSD	cyanobacteria	408172	Cyanobacteria	OTHER
10125.1810.019E11.RE11.01.14402.mzXML	0	1810_019E11_RE11_01_14402.mzXML	TRUE	2001-05-05	marine metagenome		1810_019E11_RE11_01_14402.mzXML	0	FOK05MAY01.1 Lyngbya	FALSE	0	ENVO:marine biome	ENVO:sea water	ENVO:organic material	Lyngbya	F	TRUE	TRUE	Lyngbya	cyanobacteria	1810.019E11.RE11.01.14402	1117	24.5507	-81.773	UCSD	UCSDMI	TRUE	FALSE	completed	UCSD	cyanobacteria	408172	Cyanobacteria	OTHER
10125.1810.019E5.RE5.01.14396.mzXML	0	1810_019E5_RE5_01_14396.mzXML	TRUE	2001-05-05	marine metagenome		1810_019E5_RE5_01_14396.mzXML	0	FOK05MAY01.1 Lyngbya	FALSE	0	ENVO:marine biome	ENVO:sea water	ENVO:organic material	Lyngbya	Crude	TRUE	TRUE	Lyngbya	cyanobacteria	1810.019E5.RE5.01.14396	1117	24.5507	-81.773	UCSD	UCSDMI	TRUE	FALSE	completed	UCSD	cyanobacteria	408172	Cyanobacteria	OTHER
10125.1810.019E6.RE6.01.14397.mzXML	0	1810_019E6_RE6_01_14397.mzXML	TRUE	2001-05-05	marine metagenome		1810_019E6_RE6_01_14397.mzXML	0	FOK05MAY01.2 Lyngbya	FALSE	0	ENVO:marine biome	ENVO:sea water	ENVO:organic material	Lyngbya	A	TRUE	TRUE	Lyngbya	cyanobacteria	1810.019E6.RE6.01.14397	1117	24.5507	-81.773	UCSD	UCSDMI	TRUE	FALSE	completed	UCSD	cyanobacteria	408172	Cyanobacteria	OTHER
10125.1810.019E7.RE7.01.14398.mzXML	0	1810_019E7_RE7_01_14398.mzXML	TRUE	2001-05-05	marine metagenome		1810_019E7_RE7_01_14398.mzXML	0	FOK05MAY01.1 Lyngbya	FALSE	0	ENVO:marine biome	ENVO:sea water	ENVO:organic material	Lyngbya	B	TRUE	TRUE	Lyngbya	cyanobacteria	1810.019E7.RE7.01.14398	1117	24.5507	-81.773	UCSD	UCSDMI	TRUE	FALSE	completed	UCSD	cyanobacteria	408172	Cyanobacteria	OTHER
10125.1810.019E8.RE8.01.14399.mzXML	0	1810_019E8_RE8_01_14399.mzXML	TRUE	2001-05-05	marine metagenome		1810_019E8_RE8_01_14399.mzXML	0	FOK05MAY01.1 Lyngbya	FALSE	0	ENVO:marine biome	ENVO:sea water	ENVO:organic material	Lyngbya	C	TRUE	TRUE	Lyngbya	cyanobacteria	1810.019E8.RE8.01.14399	1117	24.5507	-81.773	UCSD	UCSDMI	TRUE	FALSE	completed	UCSD	cyanobacteria	408172	Cyanobacteria	OTHER
10125.1810.019E9.RE9.01.14400.mzXML	0	1810_019E9_RE9_01_14400.mzXML	TRUE	2001-05-05	marine metagenome		1810_019E9_RE9_01_14400.mzXML	0	FOK05MAY01.1 Lyngbya	FALSE	0	ENVO:marine biome	ENVO:sea water	ENVO:organic material	Lyngbya	D	TRUE	TRUE	Lyngbya	cyanobacteria	1810.019E9.RE9.01.14400	1117	24.5507	-81.773	UCSD	UCSDMI	TRUE	FALSE	completed	UCSD	cyanobacteria	408172	Cyanobacteria	OTHER
10125.1810.019F1.RF1.01.14403.mzXML	0	1810_019F1_RF1_01_14403.mzXML	TRUE	2001-05-05	marine metagenome		1810_019F1_RF1_01_14403.mzXML	0	FOK05MAY01.1 Lyngbya	FALSE	0	ENVO:marine biome	ENVO:sea water	ENVO:organic material	Lyngbya	H	TRUE	TRUE	Lyngbya	cyanobacteria	1810.019F1.RF1.01.14403	1117	24.5507	-81.773	UCSD	UCSDMI	TRUE	FALSE	completed	UCSD	cyanobacteria	408172	Cyanobacteria	OTHER
10125.1810.019F2.RF2.01.14404.mzXML	0	1810_019F2_RF2_01_14404.mzXML	TRUE	2001-05-05	marine metagenome		1810_019F2_RF2_01_14404.mzXML	0	FOK05MAY01.1 Lyngbya	FALSE	0	ENVO:marine biome	ENVO:sea water	ENVO:organic material	Lyngbya	I	TRUE	TRUE	Lyngbya	cyanobacteria	1810.019F2.RF2.01.14404	1117	24.5507	-81.773	UCSD	UCSDMI	TRUE	FALSE	completed	UCSD	cyanobacteria	408172	Cyanobacteria	OTHER
10125.1814.019H1.RH1.01.14428.mzXML	0	1814_019H1_RH1_01_14428.mzXML	TRUE	nan	marine metagenome		1814_019H1_RH1_01_14428.mzXML	0	.Brian's Aquarium algae. Green Filamentous Algae	FALSE	0	ENVO:marine biome	ENVO:sea water	ENVO:organic material	Green Filamentous Algae	Crude	TRUE	TRUE	Green Filamentous Algae	green algae	1814.019H1.RH1.01.14428	3041	32.8427	-117.258	UCSD	UCSDMI	TRUE	FALSE	completed	UCSD	cyanobacteria	408172	Cyanobacteria	OTHER
10125.1839.020C6.GC6.01.14466.mzXML	0	1839_020C6_GC6_01_14466.mzXML	TRUE	nan	marine metagenome		1839_020C6_GC6_01_14466.mzXML	0	0 0	FALSE	0	ENVO:marine biome	ENVO:sea water	ENVO:organic material	other	other	TRUE	TRUE	other	other	1839.020C6.GC6.01.14466	408172	32.8427	-117.258	UCSD	UCSDMI	TRUE	FALSE	completed	UCSD	cyanobacteria	408172	Cyanobacteria	OTHER
10125.1839.020C9.GC9.01.14469.mzXML	0	1839_020C9_GC9_01_14469.mzXML	TRUE	nan	marine metagenome		1839_020C9_GC9_01_14469.mzXML	0	0 0	FALSE	0	ENVO:marine biome	ENVO:sea water	ENVO:organic material	other	other	TRUE	TRUE	other	other	1839.020C9.GC9.01.14469	408172	32.8427	-117.258	UCSD	UCSDMI	TRUE	FALSE	completed	UCSD	cyanobacteria	408172	Cyanobacteria	OTHER
10125.1840.020D8.GD8.01.14480.mzXML	0	1840_020D8_GD8_01_14480.mzXML	TRUE	nan	marine metagenome		1840_020D8_GD8_01_14480.mzXML	0	0 0	FALSE	0	ENVO:marine biome	ENVO:sea water	ENVO:organic material	other	other	TRUE	TRUE	other	other	1840.020D8.GD8.01.14480	408172	32.8427	-117.258	UCSD	UCSDMI	TRUE	FALSE	completed	UCSD	cyanobacteria	408172	Cyanobacteria	OTHER
10125.1866.022B8.GB8.01.14657.mzXML	0	1866_022B8_GB8_01_14657.mzXML	TRUE	nan	marine metagenome		1866_022B8_GB8_01_14657.mzXML	0	0 0	FALSE	0	ENVO:marine biome	ENVO:sea water	ENVO:organic material	other	other	TRUE	TRUE	other	other	1866.022B8.GB8.01.14657	408172	32.8427	-117.258	UCSD	UCSDMI	TRUE	FALSE	completed	UCSD	cyanobacteria	408172	Cyanobacteria	OTHER
10125.1867.022C10.GC10.01.14671.mzXML	0	1867_022C10_GC10_01_14671.mzXML	TRUE	nan	marine metagenome		1867_022C10_GC10_01_14671.mzXML	0	Elicitation experiment treatment Phormidium Cultures	FALSE	0	ENVO:marine biome	ENVO:sea water	ENVO:organic material	Phormidium Cultures	E	TRUE	TRUE	Phormidium Cultures	cyanobacteria	1867.022C10.GC10.01.14671	1117	32.8427	-117.258	UCSD	UCSDMI	TRUE	FALSE	completed	UCSD	cyanobacteria	408172	Cyanobacteria	OTHER
10125.1867.022C11.GC11.01.14672.mzXML	0	1867_022C11_GC11_01_14672.mzXML	TRUE	nan	marine metagenome		1867_022C11_GC11_01_14672.mzXML	0	Elicitation experiment treatment Phormidium Cultures	FALSE	0	ENVO:marine biome	ENVO:sea water	ENVO:organic material	Phormidium Cultures	F	TRUE	TRUE	Phormidium Cultures	cyanobacteria	1867.022C11.GC11.01.14672	1117	32.8427	-117.258	UCSD	UCSDMI	TRUE	FALSE	completed	UCSD	cyanobacteria	408172	Cyanobacteria	OTHER
10125.1867.022C5.GC5.01.14666.mzXML	0	1867_022C5_GC5_01_14666.mzXML	TRUE	nan	marine metagenome		1867_022C5_GC5_01_14666.mzXML	0	Elicitation experiment treatment Phormidium Cultures	FALSE	0	ENVO:marine biome	ENVO:sea water	ENVO:organic material	Phormidium Cultures	Crude	TRUE	TRUE	Phormidium Cultures	cyanobacteria	1867.022C5.GC5.01.14666	1117	32.8427	-117.258	UCSD	UCSDMI	TRUE	FALSE	completed	UCSD	cyanobacteria	408172	Cyanobacteria	OTHER
10125.1867.022C6.GC6.01.14667.mzXML	0	1867_022C6_GC6_01_14667.mzXML	TRUE	nan	marine metagenome		1867_022C6_GC6_01_14667.mzXML	0	Elicitation experiment treatment Phormidium Cultures	FALSE	0	ENVO:marine biome	ENVO:sea water	ENVO:organic material	Phormidium Cultures	A	TRUE	TRUE	Phormidium Cultures	cyanobacteria	1867.022C6.GC6.01.14667	1117	32.8427	-117.258	UCSD	UCSDMI	TRUE	FALSE	completed	UCSD	cyanobacteria	408172	Cyanobacteria	OTHER
10125.1867.022C7.GC7.01.14668.mzXML	0	1867_022C7_GC7_01_14668.mzXML	TRUE	nan	marine metagenome		1867_022C7_GC7_01_14668.mzXML	0	Elicitation experiment treatment Phormidium Cultures	FALSE	0	ENVO:marine biome	ENVO:sea water	ENVO:organic material	Phormidium Cultures	B	TRUE	TRUE	Phormidium Cultures	cyanobacteria	1867.022C7.GC7.01.14668	1117	32.8427	-117.258	UCSD	UCSDMI	TRUE	FALSE	completed	UCSD	cyanobacteria	408172	Cyanobacteria	OTHER
10125.1867.022C8.GC8.01.14669.mzXML	0	1867_022C8_GC8_01_14669.mzXML	TRUE	nan	marine metagenome		1867_022C8_GC8_01_14669.mzXML	0	Elicitation experiment treatment Phormidium Cultures	FALSE	0	ENVO:marine biome	ENVO:sea water	ENVO:organic material	Phormidium Cultures	C	TRUE	TRUE	Phormidium Cultures	cyanobacteria	1867.022C8.GC8.01.14669	1117	32.8427	-117.258	UCSD	UCSDMI	TRUE	FALSE	completed	UCSD	cyanobacteria	408172	Cyanobacteria	OTHER
10125.1867.022C9.GC9.01.14670.mzXML	0	1867_022C9_GC9_01_14670.mzXML	TRUE	nan	marine metagenome		1867_022C9_GC9_01_14670.mzXML	0	Elicitation experiment treatment Phormidium Cultures	FALSE	0	ENVO:marine biome	ENVO:sea water	ENVO:organic material	Phormidium Cultures	D	TRUE	TRUE	Phormidium Cultures	cyanobacteria	1867.022C9.GC9.01.14670	1117	32.8427	-117.258	UCSD	UCSDMI	TRUE	FALSE	completed	UCSD	cyanobacteria	408172	Cyanobacteria	OTHER
10125.1867.022D1.GD1.01.14673.mzXML	0	1867_022D1_GD1_01_14673.mzXML	TRUE	nan	marine metagenome		1867_022D1_GD1_01_14673.mzXML	0	Elicitation experiment treatment Phormidium Cultures	FALSE	0	ENVO:marine biome	ENVO:sea water	ENVO:organic material	Phormidium Cultures	G	TRUE	TRUE	Phormidium Cultures	cyanobacteria	1867.022D1.GD1.01.14673	1117	32.8427	-117.258	UCSD	UCSDMI	TRUE	FALSE	completed	UCSD	cyanobacteria	408172	Cyanobacteria	OTHER
10125.1867.022D2.GD2.01.14674.mzXML	0	1867_022D2_GD2_01_14674.mzXML	TRUE	nan	marine metagenome		1867_022D2_GD2_01_14674.mzXML	0	Elicitation experiment treatment Phormidium Cultures	FALSE	0	ENVO:marine biome	ENVO:sea water	ENVO:organic material	Phormidium Cultures	H	TRUE	TRUE	Phormidium Cultures	cyanobacteria	1867.022D2.GD2.01.14674	1117	32.8427	-117.258	UCSD	UCSDMI	TRUE	FALSE	completed	UCSD	cyanobacteria	408172	Cyanobacteria	OTHER
10125.1870.022E10.GE10.01.14695.mzXML	0	1870_022E10_GE10_01_14695.mzXML	TRUE	nan	marine metagenome		1870_022E10_GE10_01_14695.mzXML	0	Pedro's culture Oscillatoriales	FALSE	0	ENVO:marine biome	ENVO:sea water	ENVO:organic material	Oscillatoriales	H	TRUE	TRUE	Oscillatoriales	cyanobacteria	1870.022E10.GE10.01.14695	1117	32.8427	-117.258	UCSD	UCSDMI	TRUE	FALSE	completed	UCSD	cyanobacteria	408172	Cyanobacteria	OTHER
10125.1870.022E11.GE11.01.14696.mzXML	0	1870_022E11_GE11_01_14696.mzXML	TRUE	nan	marine metagenome		1870_022E11_GE11_01_14696.mzXML	0	Pedro's culture Oscillatoriales	FALSE	0	ENVO:marine biome	ENVO:sea water	ENVO:organic material	Oscillatoriales	I	TRUE	TRUE	Oscillatoriales	cyanobacteria	1870.022E11.GE11.01.14696	1117	32.8427	-117.258	UCSD	UCSDMI	TRUE	FALSE	completed	UCSD	cyanobacteria	408172	Cyanobacteria	OTHER
10125.1870.022E2.GE2.01.14687.mzXML	0	1870_022E2_GE2_01_14687.mzXML	TRUE	nan	marine metagenome		1870_022E2_GE2_01_14687.mzXML	0	Pedro's culture Oscillatoriales	FALSE	0	ENVO:marine biome	ENVO:sea water	ENVO:organic material	Oscillatoriales	Crude	TRUE	TRUE	Oscillatoriales	cyanobacteria	1870.022E2.GE2.01.14687	1117	32.8427	-117.258	UCSD	UCSDMI	TRUE	FALSE	completed	UCSD	cyanobacteria	408172	Cyanobacteria	OTHER
10125.1870.022E3.GE3.01.14688.mzXML	0	1870_022E3_GE3_01_14688.mzXML	TRUE	nan	marine metagenome		1870_022E3_GE3_01_14688.mzXML	0	Pedro's culture Oscillatoriales	FALSE	0	ENVO:marine biome	ENVO:sea water	ENVO:organic material	Oscillatoriales	A	TRUE	TRUE	Oscillatoriales	cyanobacteria	1870.022E3.GE3.01.14688	1117	32.8427	-117.258	UCSD	UCSDMI	TRUE	FALSE	completed	UCSD	cyanobacteria	408172	Cyanobacteria	OTHER
10125.1870.022E4.GE4.01.14689.mzXML	0	1870_022E4_GE4_01_14689.mzXML	TRUE	nan	marine metagenome		1870_022E4_GE4_01_14689.mzXML	0	Pedro's culture Oscillatoriales	FALSE	0	ENVO:marine biome	ENVO:sea water	ENVO:organic material	Oscillatoriales	B	TRUE	TRUE	Oscillatoriales	cyanobacteria	1870.022E4.GE4.01.14689	1117	32.8427	-117.258	UCSD	UCSDMI	TRUE	FALSE	completed	UCSD	cyanobacteria	408172	Cyanobacteria	OTHER
10125.1870.022E5.GE5.01.14690.mzXML	0	1870_022E5_GE5_01_14690.mzXML	TRUE	nan	marine metagenome		1870_022E5_GE5_01_14690.mzXML	0	Pedro's culture Oscillatoriales	FALSE	0	ENVO:marine biome	ENVO:sea water	ENVO:organic material	Oscillatoriales	C	TRUE	TRUE	Oscillatoriales	cyanobacteria	1870.022E5.GE5.01.14690	1117	32.8427	-117.258	UCSD	UCSDMI	TRUE	FALSE	completed	UCSD	cyanobacteria	408172	Cyanobacteria	OTHER
10125.1870.022E6.GE6.01.14691.mzXML	0	1870_022E6_GE6_01_14691.mzXML	TRUE	nan	marine metagenome		1870_022E6_GE6_01_14691.mzXML	0	Pedro's culture Oscillatoriales	FALSE	0	ENVO:marine biome	ENVO:sea water	ENVO:organic material	Oscillatoriales	D	TRUE	TRUE	Oscillatoriales	cyanobacteria	1870.022E6.GE6.01.14691	1117	32.8427	-117.258	UCSD	UCSDMI	TRUE	FALSE	completed	UCSD	cyanobacteria	408172	Cyanobacteria	OTHER
10125.1870.022E7.GE7.01.14692.mzXML	0	1870_022E7_GE7_01_14692.mzXML	TRUE	nan	marine metagenome		1870_022E7_GE7_01_14692.mzXML	0	Pedro's culture Oscillatoriales	FALSE	0	ENVO:marine biome	ENVO:sea water	ENVO:organic material	Oscillatoriales	E	TRUE	TRUE	Oscillatoriales	cyanobacteria	1870.022E7.GE7.01.14692	1117	32.8427	-117.258	UCSD	UCSDMI	TRUE	FALSE	completed	UCSD	cyanobacteria	408172	Cyanobacteria	OTHER
10125.1870.022E8.GE8.01.14693.mzXML	0	1870_022E8_GE8_01_14693.mzXML	TRUE	nan	marine metagenome		1870_022E8_GE8_01_14693.mzXML	0	Pedro's culture Oscillatoriales	FALSE	0	ENVO:marine biome	ENVO:sea water	ENVO:organic material	Oscillatoriales	F	TRUE	TRUE	Oscillatoriales	cyanobacteria	1870.022E8.GE8.01.14693	1117	32.8427	-117.258	UCSD	UCSDMI	TRUE	FALSE	completed	UCSD	cyanobacteria	408172	Cyanobacteria	OTHER
10125.1870.022E9.GE9.01.14694.mzXML	0	1870_022E9_GE9_01_14694.mzXML	TRUE	nan	marine metagenome		1870_022E9_GE9_01_14694.mzXML	0	Pedro's culture Oscillatoriales	FALSE	0	ENVO:marine biome	ENVO:sea water	ENVO:organic material	Oscillatoriales	G	TRUE	TRUE	Oscillatoriales	cyanobacteria	1870.022E9.GE9.01.14694	1117	32.8427	-117.258	UCSD	UCSDMI	TRUE	FALSE	completed	UCSD	cyanobacteria	408172	Cyanobacteria	OTHER
10125.1872.022F8.GF8.01.14716.mzXML	0	1872_022F8_GF8_01_14716.mzXML	TRUE	nan	marine metagenome		1872_022F8_GF8_01_14716.mzXML	0	0 0	FALSE	0	ENVO:marine biome	ENVO:sea water	ENVO:organic material	other	other	TRUE	TRUE	other	other	1872.022F8.GF8.01.14716	408172	32.8427	-117.258	UCSD	UCSDMI	TRUE	FALSE	completed	UCSD	cyanobacteria	408172	Cyanobacteria	OTHER
10125.1890.024A4.GA4.01.14837.mzXML	0	1890_024A4_GA4_01_14837.mzXML	TRUE	nan	marine metagenome		1890_024A4_GA4_01_14837.mzXML	0	type strain Culture P. malhamensis	FALSE	0	ENVO:marine biome	ENVO:sea water	ENVO:organic material	P. malhamensis	Crude	TRUE	TRUE	P. malhamensis	P. malhamensis	1890.024A4.GA4.01.14837	1117	32.8427	-117.258	UCSD	UCSDMI	TRUE	FALSE	completed	UCSD	cyanobacteria	408172	Cyanobacteria	OTHER
10125.1902.029A7.RA7.01.15395.mzXML	0	1902_029A7_RA7_01_15395.mzXML	TRUE	nan	marine metagenome		1902_029A7_RA7_01_15395.mzXML	0	0 0	FALSE	0	ENVO:marine biome	ENVO:sea water	ENVO:organic material	other	other	TRUE	TRUE	other	other	1902.029A7.RA7.01.15395	408172	32.8427	-117.258	UCSD	UCSDMI	TRUE	FALSE	completed	UCSD	cyanobacteria	408172	Cyanobacteria	OTHER
10125.1902.029A8.RA8.01.15396.mzXML	0	1902_029A8_RA8_01_15396.mzXML	TRUE	nan	marine metagenome		1902_029A8_RA8_01_15396.mzXML	0	0 0	FALSE	0	ENVO:marine biome	ENVO:sea water	ENVO:organic material	other	other	TRUE	TRUE	other	other	1902.029A8.RA8.01.15396	408172	32.8427	-117.258	UCSD	UCSDMI	TRUE	FALSE	completed	UCSD	cyanobacteria	408172	Cyanobacteria	OTHER
10125.1904.029B1.RB1.01.15401.mzXML	0	1904_029B1_RB1_01_15401.mzXML	TRUE	nan	marine metagenome		1904_029B1_RB1_01_15401.mzXML	0	0 0	FALSE	0	ENVO:marine biome	ENVO:sea water	ENVO:organic material	other	other	TRUE	TRUE	other	other	1904.029B1.RB1.01.15401	408172	32.8427	-117.258	UCSD	UCSDMI	TRUE	FALSE	completed	UCSD	cyanobacteria	408172	Cyanobacteria	OTHER
10125.1904.029B4.RB4.01.15404.mzXML	0	1904_029B4_RB4_01_15404.mzXML	TRUE	nan	marine metagenome		1904_029B4_RB4_01_15404.mzXML	0	0 0	FALSE	0	ENVO:marine biome	ENVO:sea water	ENVO:organic material	other	other	TRUE	TRUE	other	other	1904.029B4.RB4.01.15404	408172	32.8427	-117.258	UCSD	UCSDMI	TRUE	FALSE	completed	UCSD	cyanobacteria	408172	Cyanobacteria	OTHER
10125.1906.029C8.RC8.01.15422.mzXML	0	1906_029C8_RC8_01_15422.mzXML	TRUE	nan	marine metagenome		1906_029C8_RC8_01_15422.mzXML	0	0 0	FALSE	0	ENVO:marine biome	ENVO:sea water	ENVO:organic material	other	other	TRUE	TRUE	other	other	1906.029C8.RC8.01.15422	408172	32.8427	-117.258	UCSD	UCSDMI	TRUE	FALSE	completed	UCSD	cyanobacteria	408172	Cyanobacteria	OTHER
10125.1909.029E2.RE2.01.15442.mzXML	0	1909_029E2_RE2_01_15442.mzXML	TRUE	nan	marine metagenome		1909_029E2_RE2_01_15442.mzXML	0	0 0	FALSE	0	ENVO:marine biome	ENVO:sea water	ENVO:organic material	other	other	TRUE	TRUE	other	other	1909.029E2.RE2.01.15442	408172	32.8427	-117.258	UCSD	UCSDMI	TRUE	FALSE	completed	UCSD	cyanobacteria	408172	Cyanobacteria	OTHER
10125.1909.029E3.RE3.01.15443.mzXML	0	1909_029E3_RE3_01_15443.mzXML	TRUE	nan	marine metagenome		1909_029E3_RE3_01_15443.mzXML	0	0 0	FALSE	0	ENVO:marine biome	ENVO:sea water	ENVO:organic material	other	other	TRUE	TRUE	other	other	1909.029E3.RE3.01.15443	408172	32.8427	-117.258	UCSD	UCSDMI	TRUE	FALSE	completed	UCSD	cyanobacteria	408172	Cyanobacteria	OTHER
10125.1909.029E5.RE5.01.15445.mzXML	0	1909_029E5_RE5_01_15445.mzXML	TRUE	nan	marine metagenome		1909_029E5_RE5_01_15445.mzXML	0	0 0	FALSE	0	ENVO:marine biome	ENVO:sea water	ENVO:organic material	other	other	TRUE	TRUE	other	other	1909.029E5.RE5.01.15445	408172	32.8427	-117.258	UCSD	UCSDMI	TRUE	FALSE	completed	UCSD	cyanobacteria	408172	Cyanobacteria	OTHER
10125.1909.029E6.RE6.01.15446.mzXML	0	1909_029E6_RE6_01_15446.mzXML	TRUE	nan	marine metagenome		1909_029E6_RE6_01_15446.mzXML	0	0 0	FALSE	0	ENVO:marine biome	ENVO:sea water	ENVO:organic material	other	other	TRUE	TRUE	other	other	1909.029E6.RE6.01.15446	408172	32.8427	-117.258	UCSD	UCSDMI	TRUE	FALSE	completed	UCSD	cyanobacteria	408172	Cyanobacteria	OTHER
10125.1919.025F8.RF8.01.15023.mzXML	0	1919_025F8_RF8_01_15023.mzXML	TRUE	2001-03-07	marine metagenome		1919_025F8_RF8_01_15023.mzXML	0	FDT7MAR01 Red Filimentous	FALSE	0	ENVO:marine biome	ENVO:sea water	ENVO:organic material	Red Filimentous	Crude	TRUE	TRUE	Red Filimentous	cyanobacteria	1919.025F8.RF8.01.15023	408172	32.8427	-117.258	UCSD	UCSDMI	TRUE	FALSE	completed	UCSD	cyanobacteria	408172	Cyanobacteria	OTHER
10125.1924.026A10.GA10.01.15069.mzXML	0	1924_026A10_GA10_01_15069.mzXML	TRUE	2009-09-03	marine metagenome		1924_026A10_GA10_01_15069.mzXML	0	SS23SEP09.2 Brownish mat. oscillatoria	FALSE	0	ENVO:marine biome	ENVO:sea water	ENVO:organic material	Brownish mat- oscillatoria	C	TRUE	TRUE	Brownish mat- oscillatoria	cyanobacteria	1924.026A10.GA10.01.15069	1117	32.8427	-117.258	UCSD	UCSDMI	TRUE	FALSE	completed	UCSD	cyanobacteria	408172	Cyanobacteria	OTHER
10125.1924.026A11.GA11.01.15070.mzXML	0	1924_026A11_GA11_01_15070.mzXML	TRUE	2009-09-03	marine metagenome		1924_026A11_GA11_01_15070.mzXML	0	SS23SEP09.2 Brownish mat. oscillatoria	FALSE	0	ENVO:marine biome	ENVO:sea water	ENVO:organic material	Brownish mat- oscillatoria	D	TRUE	TRUE	Brownish mat- oscillatoria	cyanobacteria	1924.026A11.GA11.01.15070	1117	32.8427	-117.258	UCSD	UCSDMI	TRUE	FALSE	completed	UCSD	cyanobacteria	408172	Cyanobacteria	OTHER
10125.1924.026A7.GA7.01.15066.mzXML	0	1924_026A7_GA7_01_15066.mzXML	TRUE	2009-09-03	marine metagenome		1924_026A7_GA7_01_15066.mzXML	0	SS23SEP09.2 Brownish mat. oscillatoria	FALSE	0	ENVO:marine biome	ENVO:sea water	ENVO:organic material	Brownish mat- oscillatoria	Crude	TRUE	TRUE	Brownish mat- oscillatoria	cyanobacteria	1924.026A7.GA7.01.15066	1117	32.8427	-117.258	UCSD	UCSDMI	TRUE	FALSE	completed	UCSD	cyanobacteria	408172	Cyanobacteria	OTHER
10125.1924.026A8.GA8.01.15067.mzXML	0	1924_026A8_GA8_01_15067.mzXML	TRUE	2009-09-03	marine metagenome		1924_026A8_GA8_01_15067.mzXML	0	SS23SEP09.2 Brownish mat. oscillatoria	FALSE	0	ENVO:marine biome	ENVO:sea water	ENVO:organic material	Brownish mat- oscillatoria	A	TRUE	TRUE	Brownish mat- oscillatoria	cyanobacteria	1924.026A8.GA8.01.15067	1117	32.8427	-117.258	UCSD	UCSDMI	TRUE	FALSE	completed	UCSD	cyanobacteria	408172	Cyanobacteria	OTHER
10125.1924.026A9.GA9.01.15068.mzXML	0	1924_026A9_GA9_01_15068.mzXML	TRUE	2009-09-03	marine metagenome		1924_026A9_GA9_01_15068.mzXML	0	SS23SEP09.2 Brownish mat. oscillatoria	FALSE	0	ENVO:marine biome	ENVO:sea water	ENVO:organic material	Brownish mat- oscillatoria	B	TRUE	TRUE	Brownish mat- oscillatoria	cyanobacteria	1924.026A9.GA9.01.15068	1117	32.8427	-117.258	UCSD	UCSDMI	TRUE	FALSE	completed	UCSD	cyanobacteria	408172	Cyanobacteria	OTHER
10125.1924.026B1.GB1.01.15071.mzXML	0	1924_026B1_GB1_01_15071.mzXML	TRUE	2009-09-03	marine metagenome		1924_026B1_GB1_01_15071.mzXML	0	SS23SEP09.2 Brownish mat. oscillatoria	FALSE	0	ENVO:marine biome	ENVO:sea water	ENVO:organic material	Brownish mat- oscillatoria	E	TRUE	TRUE	Brownish mat- oscillatoria	cyanobacteria	1924.026B1.GB1.01.15071	1117	32.8427	-117.258	UCSD	UCSDMI	TRUE	FALSE	completed	UCSD	cyanobacteria	408172	Cyanobacteria	OTHER
10125.1924.026B2.GB2.01.15072.mzXML	0	1924_026B2_GB2_01_15072.mzXML	TRUE	2009-09-03	marine metagenome		1924_026B2_GB2_01_15072.mzXML	0	SS23SEP09.2 Brownish mat. oscillatoria	FALSE	0	ENVO:marine biome	ENVO:sea water	ENVO:organic material	Brownish mat- oscillatoria	F	TRUE	TRUE	Brownish mat- oscillatoria	cyanobacteria	1924.026B2.GB2.01.15072	1117	32.8427	-117.258	UCSD	UCSDMI	TRUE	FALSE	completed	UCSD	cyanobacteria	408172	Cyanobacteria	OTHER
10125.1924.026B3.GB3.01.15073.mzXML	0	1924_026B3_GB3_01_15073.mzXML	TRUE	2009-09-03	marine metagenome		1924_026B3_GB3_01_15073.mzXML	0	SS23SEP09.2 Brownish mat. oscillatoria	FALSE	0	ENVO:marine biome	ENVO:sea water	ENVO:organic material	Brownish mat- oscillatoria	G	TRUE	TRUE	Brownish mat- oscillatoria	cyanobacteria	1924.026B3.GB3.01.15073	1117	32.8427	-117.258	UCSD	UCSDMI	TRUE	FALSE	completed	UCSD	cyanobacteria	408172	Cyanobacteria	OTHER
10125.1924.026B4.GB4.01.15074.mzXML	0	1924_026B4_GB4_01_15074.mzXML	TRUE	2009-09-03	marine metagenome		1924_026B4_GB4_01_15074.mzXML	0	SS23SEP09.2 Brownish mat. oscillatoria	FALSE	0	ENVO:marine biome	ENVO:sea water	ENVO:organic material	Brownish mat- oscillatoria	H	TRUE	TRUE	Brownish mat- oscillatoria	cyanobacteria	1924.026B4.GB4.01.15074	1117	32.8427	-117.258	UCSD	UCSDMI	TRUE	FALSE	completed	UCSD	cyanobacteria	408172	Cyanobacteria	OTHER
10125.1924.026B5.GB5.01.15075.mzXML	0	1924_026B5_GB5_01_15075.mzXML	TRUE	2009-09-03	marine metagenome		1924_026B5_GB5_01_15075.mzXML	0	SS23SEP09.2 Brownish mat. oscillatoria	FALSE	0	ENVO:marine biome	ENVO:sea water	ENVO:organic material	Brownish mat- oscillatoria	I	TRUE	TRUE	Brownish mat- oscillatoria	cyanobacteria	1924.026B5.GB5.01.15075	1117	32.8427	-117.258	UCSD	UCSDMI	TRUE	FALSE	completed	UCSD	cyanobacteria	408172	Cyanobacteria	OTHER
10125.1927.026C10.GC10.01.15092.mzXML	0	1927_026C10_GC10_01_15092.mzXML	TRUE	2009-09-03	marine metagenome		1927_026C10_GC10_01_15092.mzXML	0	SS23SEP09.1 Oscillatoria/lyngbya	FALSE	0	ENVO:marine biome	ENVO:sea water	ENVO:organic material	Oscillatoria lyngbya	E	TRUE	TRUE	Oscillatoria lyngbya	cyanobacteria	1927.026C10.GC10.01.15092	1117	32.8427	-117.258	UCSD	UCSDMI	TRUE	FALSE	completed	UCSD	cyanobacteria	408172	Cyanobacteria	OTHER
10125.1927.026C11.GC11.01.15093.mzXML	0	1927_026C11_GC11_01_15093.mzXML	TRUE	2009-09-03	marine metagenome		1927_026C11_GC11_01_15093.mzXML	0	SS23SEP09.1 Oscillatoria/lyngbya	FALSE	0	ENVO:marine biome	ENVO:sea water	ENVO:organic material	Oscillatoria lyngbya	F	TRUE	TRUE	Oscillatoria lyngbya	cyanobacteria	1927.026C11.GC11.01.15093	1117	32.8427	-117.258	UCSD	UCSDMI	TRUE	FALSE	completed	UCSD	cyanobacteria	408172	Cyanobacteria	OTHER
10125.1927.026C5.GC5.01.15088.mzXML	0	1927_026C5_GC5_01_15088.mzXML	TRUE	2009-09-03	marine metagenome		1927_026C5_GC5_01_15088.mzXML	0	SS23SEP09.1 Oscillatoria/lyngbya	FALSE	0	ENVO:marine biome	ENVO:sea water	ENVO:organic material	Oscillatoria lyngbya	Crude	TRUE	TRUE	Oscillatoria lyngbya	cyanobacteria	1927.026C5.GC5.01.15088	1117	32.8427	-117.258	UCSD	UCSDMI	TRUE	FALSE	completed	UCSD	cyanobacteria	408172	Cyanobacteria	OTHER
10125.1927.026C6.GC6.01.15089.mzXML	0	1927_026C6_GC6_01_15089.mzXML	TRUE	2009-09-03	marine metagenome		1927_026C6_GC6_01_15089.mzXML	0	SS23SEP09.1 Oscillatoria/lyngbya	FALSE	0	ENVO:marine biome	ENVO:sea water	ENVO:organic material	Oscillatoria lyngbya	A	TRUE	TRUE	Oscillatoria lyngbya	cyanobacteria	1927.026C6.GC6.01.15089	1117	32.8427	-117.258	UCSD	UCSDMI	TRUE	FALSE	completed	UCSD	cyanobacteria	408172	Cyanobacteria	OTHER
10125.1927.026C7.GC7.01.15090.mzXML	0	1927_026C7_GC7_01_15090.mzXML	TRUE	2009-09-03	marine metagenome		1927_026C7_GC7_01_15090.mzXML	0	SS23SEP09.1 Oscillatoria/lyngbya	FALSE	0	ENVO:marine biome	ENVO:sea water	ENVO:organic material	Oscillatoria lyngbya	B	TRUE	TRUE	Oscillatoria lyngbya	cyanobacteria	1927.026C7.GC7.01.15090	1117	32.8427	-117.258	UCSD	UCSDMI	TRUE	FALSE	completed	UCSD	cyanobacteria	408172	Cyanobacteria	OTHER
10125.1927.026C9.GC9.01.15091.mzXML	0	1927_026C9_GC9_01_15091.mzXML	TRUE	2009-09-03	marine metagenome		1927_026C9_GC9_01_15091.mzXML	0	SS23SEP09.1 Oscillatoria/lyngbya	FALSE	0	ENVO:marine biome	ENVO:sea water	ENVO:organic material	Oscillatoria lyngbya	D	TRUE	TRUE	Oscillatoria lyngbya	cyanobacteria	1927.026C9.GC9.01.15091	1117	32.8427	-117.258	UCSD	UCSDMI	TRUE	FALSE	completed	UCSD	cyanobacteria	408172	Cyanobacteria	OTHER
10125.1927.026D1.GD1.01.15094.mzXML	0	1927_026D1_GD1_01_15094.mzXML	TRUE	2009-09-03	marine metagenome		1927_026D1_GD1_01_15094.mzXML	0	SS23SEP09.1 Oscillatoria/lyngbya	FALSE	0	ENVO:marine biome	ENVO:sea water	ENVO:organic material	Oscillatoria lyngbya	G	TRUE	TRUE	Oscillatoria lyngbya	cyanobacteria	1927.026D1.GD1.01.15094	1117	32.8427	-117.258	UCSD	UCSDMI	TRUE	FALSE	completed	UCSD	cyanobacteria	408172	Cyanobacteria	OTHER
10125.1927.026D2.GD2.01.15096.mzXML	0	1927_026D2_GD2_01_15096.mzXML	TRUE	2009-09-03	marine metagenome		1927_026D2_GD2_01_15096.mzXML	0	SS23SEP09.1 Oscillatoria/lyngbya	FALSE	0	ENVO:marine biome	ENVO:sea water	ENVO:organic material	Oscillatoria lyngbya	H	TRUE	TRUE	Oscillatoria lyngbya	cyanobacteria	1927.026D2.GD2.01.15096	1117	32.8427	-117.258	UCSD	UCSDMI	TRUE	FALSE	completed	UCSD	cyanobacteria	408172	Cyanobacteria	OTHER
10125.1927.026D3.GD3.01.15097.mzXML	0	1927_026D3_GD3_01_15097.mzXML	TRUE	2009-09-03	marine metagenome		1927_026D3_GD3_01_15097.mzXML	0	SS23SEP09.1 Oscillatoria/lyngbya	FALSE	0	ENVO:marine biome	ENVO:sea water	ENVO:organic material	Oscillatoria lyngbya	I	TRUE	TRUE	Oscillatoria lyngbya	cyanobacteria	1927.026D3.GD3.01.15097	1117	32.8427	-117.258	UCSD	UCSDMI	TRUE	FALSE	completed	UCSD	cyanobacteria	408172	Cyanobacteria	OTHER
10125.1933.026H6.GH6.01.15148.mzXML	0	1933_026H6_GH6_01_15148.mzXML	TRUE	nan	marine metagenome		1933_026H6_GH6_01_15148.mzXML	0	0 0	FALSE	0	ENVO:marine biome	ENVO:sea water	ENVO:organic material	other	other	TRUE	TRUE	other	other	1933.026H6.GH6.01.15148	408172	32.8427	-117.258	UCSD	UCSDMI	TRUE	FALSE	completed	UCSD	cyanobacteria	408172	Cyanobacteria	OTHER
10125.1934.026H10.GH10.01.15153.mzXML	0	1934_026H10_GH10_01_15153.mzXML	TRUE	nan	marine metagenome		1934_026H10_GH10_01_15153.mzXML	0	0 0	FALSE	0	ENVO:marine biome	ENVO:sea water	ENVO:organic material	other	other	TRUE	TRUE	other	other	1934.026H10.GH10.01.15153	408172	32.8427	-117.258	UCSD	UCSDMI	TRUE	FALSE	completed	UCSD	cyanobacteria	408172	Cyanobacteria	OTHER
10125.1934.026H11.GH11.01.15154.mzXML	0	1934_026H11_GH11_01_15154.mzXML	TRUE	nan	marine metagenome		1934_026H11_GH11_01_15154.mzXML	0	JAPAN0906 Eudistoma rigidita	FALSE	0	ENVO:marine biome	ENVO:sea water	ENVO:organic material	Eudistoma rigidita	B	TRUE	TRUE	Eudistoma rigidita	tunicates	1934.026H11.GH11.01.15154	286195	32.8427	-117.258	UCSD	UCSDMI	TRUE	FALSE	completed	UCSD	cyanobacteria	408172	Cyanobacteria	OTHER
10125.1934.026H9.GH9.01.15152.mzXML	0	1934_026H9_GH9_01_15152.mzXML	TRUE	nan	marine metagenome		1934_026H9_GH9_01_15152.mzXML	0	JAPAN0906 Eudistoma rigidita	FALSE	0	ENVO:marine biome	ENVO:sea water	ENVO:organic material	Eudistoma rigidita	Crude	TRUE	TRUE	Eudistoma rigidita	tunicates	1934.026H9.GH9.01.15152	286195	32.8427	-117.258	UCSD	UCSDMI	TRUE	FALSE	completed	UCSD	cyanobacteria	408172	Cyanobacteria	OTHER
10125.1934.027A1.RA1.01.15155.mzXML	0	1934_027A1_RA1_01_15155.mzXML	TRUE	nan	marine metagenome		1934_027A1_RA1_01_15155.mzXML	0	JAPAN0906 Eudistoma rigidita	FALSE	0	ENVO:marine biome	ENVO:sea water	ENVO:organic material	Eudistoma rigidita	C	TRUE	TRUE	Eudistoma rigidita	tunicates	1934.027A1.RA1.01.15155	286195	32.8427	-117.258	UCSD	UCSDMI	TRUE	FALSE	completed	UCSD	cyanobacteria	408172	Cyanobacteria	OTHER
10125.1934.027A2.RA2.01.15156.mzXML	0	1934_027A2_RA2_01_15156.mzXML	TRUE	nan	marine metagenome		1934_027A2_RA2_01_15156.mzXML	0	JAPAN0906 Eudistoma rigidita	FALSE	0	ENVO:marine biome	ENVO:sea water	ENVO:organic material	Eudistoma rigidita	D	TRUE	TRUE	Eudistoma rigidita	tunicates	1934.027A2.RA2.01.15156	286195	32.8427	-117.258	UCSD	UCSDMI	TRUE	FALSE	completed	UCSD	cyanobacteria	408172	Cyanobacteria	OTHER
10125.1934.027A3.RA3.01.15157.mzXML	0	1934_027A3_RA3_01_15157.mzXML	TRUE	nan	marine metagenome		1934_027A3_RA3_01_15157.mzXML	0	JAPAN0906 Eudistoma rigidita	FALSE	0	ENVO:marine biome	ENVO:sea water	ENVO:organic material	Eudistoma rigidita	E	TRUE	TRUE	Eudistoma rigidita	tunicates	1934.027A3.RA3.01.15157	286195	32.8427	-117.258	UCSD	UCSDMI	TRUE	FALSE	completed	UCSD	cyanobacteria	408172	Cyanobacteria	OTHER
10125.1934.027A4.RA4.01.15158.mzXML	0	1934_027A4_RA4_01_15158.mzXML	TRUE	nan	marine metagenome		1934_027A4_RA4_01_15158.mzXML	0	JAPAN0906 Eudistoma rigidita	FALSE	0	ENVO:marine biome	ENVO:sea water	ENVO:organic material	Eudistoma rigidita	F	TRUE	TRUE	Eudistoma rigidita	tunicates	1934.027A4.RA4.01.15158	286195	32.8427	-117.258	UCSD	UCSDMI	TRUE	FALSE	completed	UCSD	cyanobacteria	408172	Cyanobacteria	OTHER
10125.1934.027A5.RA5.01.15159.mzXML	0	1934_027A5_RA5_01_15159.mzXML	TRUE	nan	marine metagenome		1934_027A5_RA5_01_15159.mzXML	0	JAPAN0906 Eudistoma rigidita	FALSE	0	ENVO:marine biome	ENVO:sea water	ENVO:organic material	Eudistoma rigidita	H	TRUE	TRUE	Eudistoma rigidita	tunicates	1934.027A5.RA5.01.15159	286195	32.8427	-117.258	UCSD	UCSDMI	TRUE	FALSE	completed	UCSD	cyanobacteria	408172	Cyanobacteria	OTHER
10125.1934.027A6.RA6.01.15160.mzXML	0	1934_027A6_RA6_01_15160.mzXML	TRUE	nan	marine metagenome		1934_027A6_RA6_01_15160.mzXML	0	JAPAN0906 Eudistoma rigidita	FALSE	0	ENVO:marine biome	ENVO:sea water	ENVO:organic material	Eudistoma rigidita	I	TRUE	TRUE	Eudistoma rigidita	tunicates	1934.027A6.RA6.01.15160	286195	32.8427	-117.258	UCSD	UCSDMI	TRUE	FALSE	completed	UCSD	cyanobacteria	408172	Cyanobacteria	OTHER
10125.1939.027B3.RB3.01.15174.mzXML	0	1939_027B3_RB3_01_15174.mzXML	TRUE	nan	marine metagenome		1939_027B3_RB3_01_15174.mzXML	0	0 0	FALSE	0	ENVO:marine biome	ENVO:sea water	ENVO:organic material	other	other	TRUE	TRUE	other	other	1939.027B3.RB3.01.15174	408172	32.8427	-117.258	UCSD	UCSDMI	TRUE	FALSE	completed	UCSD	cyanobacteria	408172	Cyanobacteria	OTHER
10125.1939.027B7.RB7.01.15178.mzXML	0	1939_027B7_RB7_01_15178.mzXML	TRUE	nan	marine metagenome		1939_027B7_RB7_01_15178.mzXML	0	0 0	FALSE	0	ENVO:marine biome	ENVO:sea water	ENVO:organic material	other	other	TRUE	TRUE	other	other	1939.027B7.RB7.01.15178	408172	32.8427	-117.258	UCSD	UCSDMI	TRUE	FALSE	completed	UCSD	cyanobacteria	408172	Cyanobacteria	OTHER
10125.1940.027C2.RC2.01.15185.mzXML	0	1940_027C2_RC2_01_15185.mzXML	TRUE	nan	marine metagenome		1940_027C2_RC2_01_15185.mzXML	0	0 0	FALSE	0	ENVO:marine biome	ENVO:sea water	ENVO:organic material	other	other	TRUE	TRUE	other	other	1940.027C2.RC2.01.15185	408172	32.8427	-117.258	UCSD	UCSDMI	TRUE	FALSE	completed	UCSD	cyanobacteria	408172	Cyanobacteria	OTHER
10125.1941.027C11.RC11.01.15198.mzXML	0	1941_027C11_RC11_01_15198.mzXML	TRUE	nan	marine metagenome		1941_027C11_RC11_01_15198.mzXML	0	0 0	FALSE	0	ENVO:marine biome	ENVO:sea water	ENVO:organic material	other	other	TRUE	TRUE	other	other	1941.027C11.RC11.01.15198	408172	32.8427	-117.258	UCSD	UCSDMI	TRUE	FALSE	completed	UCSD	cyanobacteria	408172	Cyanobacteria	OTHER
10125.1943.027F7.RF7.01.15232.mzXML	0	1943_027F7_RF7_01_15232.mzXML	TRUE	nan	marine metagenome		1943_027F7_RF7_01_15232.mzXML	0	0 0	FALSE	0	ENVO:marine biome	ENVO:sea water	ENVO:organic material	other	other	TRUE	TRUE	other	other	1943.027F7.RF7.01.15232	408172	32.8427	-117.258	UCSD	UCSDMI	TRUE	FALSE	completed	UCSD	cyanobacteria	408172	Cyanobacteria	OTHER
10125.1943.027F8.RF8.01.15233.mzXML	0	1943_027F8_RF8_01_15233.mzXML	TRUE	nan	marine metagenome		1943_027F8_RF8_01_15233.mzXML	0	0 0	FALSE	0	ENVO:marine biome	ENVO:sea water	ENVO:organic material	other	other	TRUE	TRUE	other	other	1943.027F8.RF8.01.15233	408172	32.8427	-117.258	UCSD	UCSDMI	TRUE	FALSE	completed	UCSD	cyanobacteria	408172	Cyanobacteria	OTHER
10125.1946.027H11.2.RH11.01.15268.mzXML	0	1946_027H11_2_RH11_01_15268.mzXML	TRUE	nan	marine metagenome		1946_027H11_2_RH11_01_15268.mzXML	0	0 0	FALSE	0	ENVO:marine biome	ENVO:sea water	ENVO:organic material	other	other	TRUE	TRUE	other	other	1946.027H11.2.RH11.01.15268	408172	32.8427	-117.258	UCSD	UCSDMI	TRUE	FALSE	completed	UCSD	cyanobacteria	408172	Cyanobacteria	OTHER
10125.1946.027H9.2.RH9.01.15266.mzXML	0	1946_027H9_2_RH9_01_15266.mzXML	TRUE	nan	marine metagenome		1946_027H9_2_RH9_01_15266.mzXML	0	0 0	FALSE	0	ENVO:marine biome	ENVO:sea water	ENVO:organic material	other	other	TRUE	TRUE	other	other	1946.027H9.2.RH9.01.15266	408172	32.8427	-117.258	UCSD	UCSDMI	TRUE	FALSE	completed	UCSD	cyanobacteria	408172	Cyanobacteria	OTHER
10125.1965.028D1.GD1.01.15308.mzXML	0	1965_028D1_GD1_01_15308.mzXML	TRUE	nan	marine metagenome		1965_028D1_GD1_01_15308.mzXML	0	0 0	FALSE	0	ENVO:marine biome	ENVO:sea water	ENVO:organic material	other	other	TRUE	TRUE	other	other	1965.028D1.GD1.01.15308	408172	32.8427	-117.258	UCSD	UCSDMI	TRUE	FALSE	completed	UCSD	cyanobacteria	408172	Cyanobacteria	OTHER
10125.1966.028D10.GD10.01.15319.mzXML	0	1966_028D10_GD10_01_15319.mzXML	TRUE	nan	marine metagenome		1966_028D10_GD10_01_15319.mzXML	0	0 0	FALSE	0	ENVO:marine biome	ENVO:sea water	ENVO:organic material	other	other	TRUE	TRUE	other	other	1966.028D10.GD10.01.15319	408172	32.8427	-117.258	UCSD	UCSDMI	TRUE	FALSE	completed	UCSD	cyanobacteria	408172	Cyanobacteria	OTHER
10125.1968.028F3.GF3.01.15339.mzXML	0	1968_028F3_GF3_01_15339.mzXML	TRUE	nan	marine metagenome		1968_028F3_GF3_01_15339.mzXML	0	0 0	FALSE	0	ENVO:marine biome	ENVO:sea water	ENVO:organic material	other	other	TRUE	TRUE	other	other	1968.028F3.GF3.01.15339	408172	32.8427	-117.258	UCSD	UCSDMI	TRUE	FALSE	completed	UCSD	cyanobacteria	408172	Cyanobacteria	OTHER
10125.1981.028G8.GG8.01.15358.mzXML	0	1981_028G8_GG8_01_15358.mzXML	TRUE	nan	marine metagenome		1981_028G8_GG8_01_15358.mzXML	0	0 0	FALSE	0	ENVO:marine biome	ENVO:sea water	ENVO:organic material	other	other	TRUE	TRUE	other	other	1981.028G8.GG8.01.15358	408172	32.8427	-117.258	UCSD	UCSDMI	TRUE	FALSE	completed	UCSD	cyanobacteria	408172	Cyanobacteria	OTHER
10125.1982.028H3.GH3.01.15367.mzXML	0	1982_028H3_GH3_01_15367.mzXML	TRUE	nan	marine metagenome		1982_028H3_GH3_01_15367.mzXML	0	0 0	FALSE	0	ENVO:marine biome	ENVO:sea water	ENVO:organic material	other	other	TRUE	TRUE	other	other	1982.028H3.GH3.01.15367	408172	32.8427	-117.258	UCSD	UCSDMI	TRUE	FALSE	completed	UCSD	cyanobacteria	408172	Cyanobacteria	OTHER
10125.2017.030E10.GE10.01.15535.mzXML	0	2017_030E10_GE10_01_15535.mzXML	TRUE	2000-04-17	marine metagenome		2017_030E10_GE10_01_15535.mzXML	0	MNT17APR00.1 Lyngbya	FALSE	0	ENVO:marine biome	ENVO:sea water	ENVO:organic material	Lyngbya	G	TRUE	TRUE	Lyngbya	cyanobacteria	2017.030E10.GE10.01.15535	1117	-11.1469	47.5808	UCSD	UCSDMI	TRUE	FALSE	completed	UCSD	cyanobacteria	408172	Cyanobacteria	OTHER
10125.2017.030E11.GE11.01.15536.mzXML	0	2017_030E11_GE11_01_15536.mzXML	TRUE	2000-04-17	marine metagenome		2017_030E11_GE11_01_15536.mzXML	0	MNT17APR00.1 Lyngbya	FALSE	0	ENVO:marine biome	ENVO:sea water	ENVO:organic material	Lyngbya	H	TRUE	TRUE	Lyngbya	cyanobacteria	2017.030E11.GE11.01.15536	1117	-11.1469	47.5808	UCSD	UCSDMI	TRUE	FALSE	completed	UCSD	cyanobacteria	408172	Cyanobacteria	OTHER
10125.2017.030E3.GE3.01.15522.mzXML	0	2017_030E3_GE3_01_15522.mzXML	TRUE	2000-04-17	marine metagenome		2017_030E3_GE3_01_15522.mzXML	0	MNT17APR00.1 Lyngbya	FALSE	0	ENVO:marine biome	ENVO:sea water	ENVO:organic material	Lyngbya	Crude	TRUE	TRUE	Lyngbya	cyanobacteria	2017.030E3.GE3.01.15522	1117	-11.1469	47.5808	UCSD	UCSDMI	TRUE	FALSE	completed	UCSD	cyanobacteria	408172	Cyanobacteria	OTHER
10125.2017.030E4.GE4.01.15523.mzXML	0	2017_030E4_GE4_01_15523.mzXML	TRUE	2000-04-17	marine metagenome		2017_030E4_GE4_01_15523.mzXML	0	MNT17APR00.1 Lyngbya	FALSE	0	ENVO:marine biome	ENVO:sea water	ENVO:organic material	Lyngbya	A	TRUE	TRUE	Lyngbya	cyanobacteria	2017.030E4.GE4.01.15523	1117	-11.1469	47.5808	UCSD	UCSDMI	TRUE	FALSE	completed	UCSD	cyanobacteria	408172	Cyanobacteria	OTHER
10125.2017.030E5.GE5.01.15525.mzXML	0	2017_030E5_GE5_01_15525.mzXML	TRUE	2000-04-17	marine metagenome		2017_030E5_GE5_01_15525.mzXML	0	MNT17APR00.1 Lyngbya	FALSE	0	ENVO:marine biome	ENVO:sea water	ENVO:organic material	Lyngbya	B	TRUE	TRUE	Lyngbya	cyanobacteria	2017.030E5.GE5.01.15525	1117	-11.1469	47.5808	UCSD	UCSDMI	TRUE	FALSE	completed	UCSD	cyanobacteria	408172	Cyanobacteria	OTHER
10125.2017.030E6.GE6.01.15526.mzXML	0	2017_030E6_GE6_01_15526.mzXML	TRUE	2000-04-17	marine metagenome		2017_030E6_GE6_01_15526.mzXML	0	MNT17APR00.1 Lyngbya	FALSE	0	ENVO:marine biome	ENVO:sea water	ENVO:organic material	Lyngbya	C	TRUE	TRUE	Lyngbya	cyanobacteria	2017.030E6.GE6.01.15526	1117	-11.1469	47.5808	UCSD	UCSDMI	TRUE	FALSE	completed	UCSD	cyanobacteria	408172	Cyanobacteria	OTHER
10125.2017.030E7.GE7.01.15530.mzXML	0	2017_030E7_GE7_01_15530.mzXML	TRUE	2000-04-17	marine metagenome		2017_030E7_GE7_01_15530.mzXML	0	MNT17APR00.1 Lyngbya	FALSE	0	ENVO:marine biome	ENVO:sea water	ENVO:organic material	Lyngbya	D	TRUE	TRUE	Lyngbya	cyanobacteria	2017.030E7.GE7.01.15530	1117	-11.1469	47.5808	UCSD	UCSDMI	TRUE	FALSE	completed	UCSD	cyanobacteria	408172	Cyanobacteria	OTHER
10125.2017.030E8.GE8.01.15532.mzXML	0	2017_030E8_GE8_01_15532.mzXML	TRUE	2000-04-17	marine metagenome		2017_030E8_GE8_01_15532.mzXML	0	MNT17APR00.1 Lyngbya	FALSE	0	ENVO:marine biome	ENVO:sea water	ENVO:organic material	Lyngbya	E	TRUE	TRUE	Lyngbya	cyanobacteria	2017.030E8.GE8.01.15532	1117	-11.1469	47.5808	UCSD	UCSDMI	TRUE	FALSE	completed	UCSD	cyanobacteria	408172	Cyanobacteria	OTHER
10125.2017.030E9.GE9.01.15533.mzXML	0	2017_030E9_GE9_01_15533.mzXML	TRUE	2000-04-17	marine metagenome		2017_030E9_GE9_01_15533.mzXML	0	MNT17APR00.1 Lyngbya	FALSE	0	ENVO:marine biome	ENVO:sea water	ENVO:organic material	Lyngbya	F	TRUE	TRUE	Lyngbya	cyanobacteria	2017.030E9.GE9.01.15533	1117	-11.1469	47.5808	UCSD	UCSDMI	TRUE	FALSE	completed	UCSD	cyanobacteria	408172	Cyanobacteria	OTHER
10125.2017.030F1.GF1.01.15538.mzXML	0	2017_030F1_GF1_01_15538.mzXML	TRUE	2000-04-17	marine metagenome		2017_030F1_GF1_01_15538.mzXML	0	MNT17APR00.1 Lyngbya	FALSE	0	ENVO:marine biome	ENVO:sea water	ENVO:organic material	Lyngbya	I	TRUE	TRUE	Lyngbya	cyanobacteria	2017.030F1.GF1.01.15538	1117	-11.1469	47.5808	UCSD	UCSDMI	TRUE	FALSE	completed	UCSD	cyanobacteria	408172	Cyanobacteria	OTHER
10125.A1856.021E5.RE5.01.14592.mzXML	0	A1856_021E5_RE5_01_14592.mzXML	TRUE	nan	marine metagenome		A1856_021E5_RE5_01_14592.mzXML	0	0 0	FALSE	0	ENVO:marine biome	ENVO:sea water	ENVO:organic material	other	other	TRUE	TRUE	other	other	A1856.021E5.RE5.01.14592	408172	32.8427	-117.258	UCSD	UCSDMI	TRUE	FALSE	completed	UCSD	cyanobacteria	408172	Cyanobacteria	OTHER
10125.A1856.021E7.RE7.01.14594.mzXML	0	A1856_021E7_RE7_01_14594.mzXML	TRUE	nan	marine metagenome		A1856_021E7_RE7_01_14594.mzXML	0	0 0	FALSE	0	ENVO:marine biome	ENVO:sea water	ENVO:organic material	other	other	TRUE	TRUE	other	other	A1856.021E7.RE7.01.14594	408172	32.8427	-117.258	UCSD	UCSDMI	TRUE	FALSE	completed	UCSD	cyanobacteria	408172	Cyanobacteria	OTHER
10125.A1859.021F10.RF10.01.14610.mzXML	0	A1859_021F10_RF10_01_14610.mzXML	TRUE	nan	marine metagenome		A1859_021F10_RF10_01_14610.mzXML	0	0 0	FALSE	0	ENVO:marine biome	ENVO:sea water	ENVO:organic material	other	other	TRUE	TRUE	other	other	A1859.021F10.RF10.01.14610	408172	32.8427	-117.258	UCSD	UCSDMI	TRUE	FALSE	completed	UCSD	cyanobacteria	408172	Cyanobacteria	OTHER
10125.1954.027D2.RD2.01.15209.mzXML	0	1954_027D2_RD2_01_15209.mzXML	TRUE	2009-06-18	marine metagenome	GAZ:Panama	1954_027D2_RD2_01_15209.mzXML	0	PAB18JUN09.3 unknown	FALSE	0	ENVO:marine biome	ENVO:sea water	ENVO:organic material	other	Crude	TRUE	TRUE	other	other	1954.027D2.RD2.01.15209	408172	32.8427	-117.258	UCSD	UCSDMI	TRUE	FALSE	completed	UCSD	cyanobacteria	408172	Cyanobacteria	PAB
10125.A1585.004C10.2.GC10.01.12833.mzXML	0	A1585_004C10_2_GC10_01_12833.mzXML	TRUE	2005-04-07	marine metagenome	GAZ:Panama	A1585_004C10_2_GC10_01_12833.mzXML	0	PAB7APR05.7 Oscillatoria sp.	FALSE	0	ENVO:marine biome	ENVO:sea water	ENVO:organic material	Oscillatoria sp.	B	TRUE	TRUE	Oscillatoria sp.	cyanobacteria	A1585.004C10.2.GC10.01.12833	1117	9.29387	-82.194	UCSD	UCSDMI	TRUE	FALSE	completed	UCSD	cyanobacteria	408172	Cyanobacteria	PAB
10125.A1585.004C11.GC11.01.12832.mzXML	0	A1585_004C11_GC11_01_12832.mzXML	TRUE	2005-04-07	marine metagenome	GAZ:Panama	A1585_004C11_GC11_01_12832.mzXML	0	PAB7APR05.7 Oscillatoria sp.	FALSE	0	ENVO:marine biome	ENVO:sea water	ENVO:organic material	Oscillatoria sp.	C	TRUE	TRUE	Oscillatoria sp.	cyanobacteria	A1585.004C11.GC11.01.12832	1117	9.29387	-82.194	UCSD	UCSDMI	TRUE	FALSE	completed	UCSD	cyanobacteria	408172	Cyanobacteria	PAB
10125.A1585.004C8.2.GC8.01.12830.mzXML	0	A1585_004C8_2_GC8_01_12830.mzXML	TRUE	2005-04-07	marine metagenome	GAZ:Panama	A1585_004C8_2_GC8_01_12830.mzXML	0	PAB7APR05.7 Oscillatoria sp.	FALSE	0	ENVO:marine biome	ENVO:sea water	ENVO:organic material	Oscillatoria sp.	Crude	TRUE	TRUE	Oscillatoria sp.	cyanobacteria	A1585.004C8.2.GC8.01.12830	1117	9.29387	-82.194	UCSD	UCSDMI	TRUE	FALSE	completed	UCSD	cyanobacteria	408172	Cyanobacteria	PAB
10125.A1585.004C9.GC9.01.12829.mzXML	0	A1585_004C9_GC9_01_12829.mzXML	TRUE	2005-04-07	marine metagenome	GAZ:Panama	A1585_004C9_GC9_01_12829.mzXML	0	PAB7APR05.7 Oscillatoria sp.	FALSE	0	ENVO:marine biome	ENVO:sea water	ENVO:organic material	Oscillatoria sp.	A	TRUE	TRUE	Oscillatoria sp.	cyanobacteria	A1585.004C9.GC9.01.12829	1117	9.29387	-82.194	UCSD	UCSDMI	TRUE	FALSE	completed	UCSD	cyanobacteria	408172	Cyanobacteria	PAB
10125.A1585.004D1.GD1.01.12834.mzXML	0	A1585_004D1_GD1_01_12834.mzXML	TRUE	2005-04-07	marine metagenome	GAZ:Panama	A1585_004D1_GD1_01_12834.mzXML	0	PAB7APR05.7 Oscillatoria sp.	FALSE	0	ENVO:marine biome	ENVO:sea water	ENVO:organic material	Oscillatoria sp.	D	TRUE	TRUE	Oscillatoria sp.	cyanobacteria	A1585.004D1.GD1.01.12834	1117	9.29387	-82.194	UCSD	UCSDMI	TRUE	FALSE	completed	UCSD	cyanobacteria	408172	Cyanobacteria	PAB
10125.A1585.004D2.GD2.01.12835.mzXML	0	A1585_004D2_GD2_01_12835.mzXML	TRUE	2005-04-07	marine metagenome	GAZ:Panama	A1585_004D2_GD2_01_12835.mzXML	0	PAB7APR05.7 Oscillatoria sp.	FALSE	0	ENVO:marine biome	ENVO:sea water	ENVO:organic material	Oscillatoria sp.	E	TRUE	TRUE	Oscillatoria sp.	cyanobacteria	A1585.004D2.GD2.01.12835	1117	9.29387	-82.194	UCSD	UCSDMI	TRUE	FALSE	completed	UCSD	cyanobacteria	408172	Cyanobacteria	PAB
10125.A1585.004D3.GD3.01.12836.mzXML	0	A1585_004D3_GD3_01_12836.mzXML	TRUE	2005-04-07	marine metagenome	GAZ:Panama	A1585_004D3_GD3_01_12836.mzXML	0	PAB7APR05.7 Oscillatoria sp.	FALSE	0	ENVO:marine biome	ENVO:sea water	ENVO:organic material	Oscillatoria sp.	F	TRUE	TRUE	Oscillatoria sp.	cyanobacteria	A1585.004D3.GD3.01.12836	1117	9.29387	-82.194	UCSD	UCSDMI	TRUE	FALSE	completed	UCSD	cyanobacteria	408172	Cyanobacteria	PAB
10125.A1585.004D5.GD5.01.12838.mzXML	0	A1585_004D5_GD5_01_12838.mzXML	TRUE	2005-04-07	marine metagenome	GAZ:Panama	A1585_004D5_GD5_01_12838.mzXML	0	PAB7APR05.7 Oscillatoria sp.	FALSE	0	ENVO:marine biome	ENVO:sea water	ENVO:organic material	Oscillatoria sp.	H	TRUE	TRUE	Oscillatoria sp.	cyanobacteria	A1585.004D5.GD5.01.12838	1117	9.29387	-82.194	UCSD	UCSDMI	TRUE	FALSE	completed	UCSD	cyanobacteria	408172	Cyanobacteria	PAB
10125.A1585.004D6.GD6.01.12839.mzXML	0	A1585_004D6_GD6_01_12839.mzXML	TRUE	2005-04-07	marine metagenome	GAZ:Panama	A1585_004D6_GD6_01_12839.mzXML	0	PAB7APR05.7 Oscillatoria sp.	FALSE	0	ENVO:marine biome	ENVO:sea water	ENVO:organic material	Oscillatoria sp.	I	TRUE	TRUE	Oscillatoria sp.	cyanobacteria	A1585.004D6.GD6.01.12839	1117	9.29387	-82.194	UCSD	UCSDMI	TRUE	FALSE	completed	UCSD	cyanobacteria	408172	Cyanobacteria	PAB
10125.A1590.004G10.GG10.01.12884.mzXML	0	A1590_004G10_GG10_01_12884.mzXML	TRUE	2005-04-04	marine metagenome	GAZ:Panama	A1590_004G10_GG10_01_12884.mzXML	0	PAB4APR05.1 chain diatom	FALSE	0	ENVO:marine biome	ENVO:sea water	ENVO:organic material	chain diatom	G	TRUE	TRUE	chain diatom	other	A1590.004G10.GG10.01.12884	408172	9.24472	-82.1607	UCSD	UCSDMI	TRUE	FALSE	completed	UCSD	cyanobacteria	408172	Cyanobacteria	PAB
10125.A1590.004G11.GG11.01.12885.mzXML	0	A1590_004G11_GG11_01_12885.mzXML	TRUE	2005-04-04	marine metagenome	GAZ:Panama	A1590_004G11_GG11_01_12885.mzXML	0	PAB4APR05.1 chain diatom	FALSE	0	ENVO:marine biome	ENVO:sea water	ENVO:organic material	chain diatom	H	TRUE	TRUE	chain diatom	other	A1590.004G11.GG11.01.12885	408172	9.24472	-82.1607	UCSD	UCSDMI	TRUE	FALSE	completed	UCSD	cyanobacteria	408172	Cyanobacteria	PAB
10125.A1590.004G3.GG3.01.12877.mzXML	0	A1590_004G3_GG3_01_12877.mzXML	TRUE	2005-04-04	marine metagenome	GAZ:Panama	A1590_004G3_GG3_01_12877.mzXML	0	PAB4APR05.1 chain diatom	FALSE	0	ENVO:marine biome	ENVO:sea water	ENVO:organic material	chain diatom	Crude	TRUE	TRUE	chain diatom	other	A1590.004G3.GG3.01.12877	408172	9.24472	-82.1607	UCSD	UCSDMI	TRUE	FALSE	completed	UCSD	cyanobacteria	408172	Cyanobacteria	PAB
10125.A1590.004G4.GG4.01.12878.mzXML	0	A1590_004G4_GG4_01_12878.mzXML	TRUE	2005-04-04	marine metagenome	GAZ:Panama	A1590_004G4_GG4_01_12878.mzXML	0	PAB4APR05.1 chain diatom	FALSE	0	ENVO:marine biome	ENVO:sea water	ENVO:organic material	chain diatom	A	TRUE	TRUE	chain diatom	other	A1590.004G4.GG4.01.12878	408172	9.24472	-82.1607	UCSD	UCSDMI	TRUE	FALSE	completed	UCSD	cyanobacteria	408172	Cyanobacteria	PAB
10125.A1590.004G5.GG5.01.12879.mzXML	0	A1590_004G5_GG5_01_12879.mzXML	TRUE	2005-04-04	marine metagenome	GAZ:Panama	A1590_004G5_GG5_01_12879.mzXML	0	PAB4APR05.1 chain diatom	FALSE	0	ENVO:marine biome	ENVO:sea water	ENVO:organic material	chain diatom	B	TRUE	TRUE	chain diatom	other	A1590.004G5.GG5.01.12879	408172	9.24472	-82.1607	UCSD	UCSDMI	TRUE	FALSE	completed	UCSD	cyanobacteria	408172	Cyanobacteria	PAB
10125.A1590.004G6.GG6.01.12880.mzXML	0	A1590_004G6_GG6_01_12880.mzXML	TRUE	2005-04-04	marine metagenome	GAZ:Panama	A1590_004G6_GG6_01_12880.mzXML	0	PAB4APR05.1 chain diatom	FALSE	0	ENVO:marine biome	ENVO:sea water	ENVO:organic material	chain diatom	C	TRUE	TRUE	chain diatom	other	A1590.004G6.GG6.01.12880	408172	9.24472	-82.1607	UCSD	UCSDMI	TRUE	FALSE	completed	UCSD	cyanobacteria	408172	Cyanobacteria	PAB
10125.A1590.004G7.GG7.01.12881.mzXML	0	A1590_004G7_GG7_01_12881.mzXML	TRUE	2005-04-04	marine metagenome	GAZ:Panama	A1590_004G7_GG7_01_12881.mzXML	0	PAB4APR05.1 chain diatom	FALSE	0	ENVO:marine biome	ENVO:sea water	ENVO:organic material	chain diatom	D	TRUE	TRUE	chain diatom	other	A1590.004G7.GG7.01.12881	408172	9.24472	-82.1607	UCSD	UCSDMI	TRUE	FALSE	completed	UCSD	cyanobacteria	408172	Cyanobacteria	PAB
10125.A1590.004G8.GG8.01.12882.mzXML	0	A1590_004G8_GG8_01_12882.mzXML	TRUE	2005-04-04	marine metagenome	GAZ:Panama	A1590_004G8_GG8_01_12882.mzXML	0	PAB4APR05.1 chain diatom	FALSE	0	ENVO:marine biome	ENVO:sea water	ENVO:organic material	chain diatom	E	TRUE	TRUE	chain diatom	other	A1590.004G8.GG8.01.12882	408172	9.24472	-82.1607	UCSD	UCSDMI	TRUE	FALSE	completed	UCSD	cyanobacteria	408172	Cyanobacteria	PAB
10125.A1590.004G9.GG9.01.12883.mzXML	0	A1590_004G9_GG9_01_12883.mzXML	TRUE	2005-04-04	marine metagenome	GAZ:Panama	A1590_004G9_GG9_01_12883.mzXML	0	PAB4APR05.1 chain diatom	FALSE	0	ENVO:marine biome	ENVO:sea water	ENVO:organic material	chain diatom	F	TRUE	TRUE	chain diatom	other	A1590.004G9.GG9.01.12883	408172	9.24472	-82.1607	UCSD	UCSDMI	TRUE	FALSE	completed	UCSD	cyanobacteria	408172	Cyanobacteria	PAB
10125.A1590.004H1.GH1.01.12886.mzXML	0	A1590_004H1_GH1_01_12886.mzXML	TRUE	2005-04-04	marine metagenome	GAZ:Panama	A1590_004H1_GH1_01_12886.mzXML	0	PAB4APR05.1 chain diatom	FALSE	0	ENVO:marine biome	ENVO:sea water	ENVO:organic material	chain diatom	I	TRUE	TRUE	chain diatom	other	A1590.004H1.GH1.01.12886	408172	9.24472	-82.1607	UCSD	UCSDMI	TRUE	FALSE	completed	UCSD	cyanobacteria	408172	Cyanobacteria	PAB
10125.A1690.010F10.GF10.01.13488.mzXML	0	A1690_010F10_GF10_01_13488.mzXML	TRUE	2007-06-29	marine metagenome	GAZ:Panama	A1690_010F10_GF10_01_13488.mzXML	0	PAB29JUN07.2 Schizothrix sp.	FALSE	0	ENVO:marine biome	ENVO:sea water	ENVO:organic material	Schizothrix sp.	F	TRUE	TRUE	Schizothrix sp.	cyanobacteria	A1690.010F10.GF10.01.13488	1117	9.61513	-79.5823	UCSD	UCSDMI	TRUE	FALSE	completed	UCSD	cyanobacteria	408172	Cyanobacteria	PAB
10125.A1690.010F11.GF11.01.13489.mzXML	0	A1690_010F11_GF11_01_13489.mzXML	TRUE	2007-06-29	marine metagenome	GAZ:Panama	A1690_010F11_GF11_01_13489.mzXML	0	PAB29JUN07.2 Schizothrix sp.	FALSE	0	ENVO:marine biome	ENVO:sea water	ENVO:organic material	Schizothrix sp.	G	TRUE	TRUE	Schizothrix sp.	cyanobacteria	A1690.010F11.GF11.01.13489	1117	9.61513	-79.5823	UCSD	UCSDMI	TRUE	FALSE	completed	UCSD	cyanobacteria	408172	Cyanobacteria	PAB
10125.A1690.010F4.GF4.01.13482.mzXML	0	A1690_010F4_GF4_01_13482.mzXML	TRUE	2007-06-29	marine metagenome	GAZ:Panama	A1690_010F4_GF4_01_13482.mzXML	0	PAB29JUN07.2 Schizothrix sp.	FALSE	0	ENVO:marine biome	ENVO:sea water	ENVO:organic material	Schizothrix sp.	Crude	TRUE	TRUE	Schizothrix sp.	cyanobacteria	A1690.010F4.GF4.01.13482	1117	9.61513	-79.5823	UCSD	UCSDMI	TRUE	FALSE	completed	UCSD	cyanobacteria	408172	Cyanobacteria	PAB
10125.A1690.010F6.GF6.01.13484.mzXML	0	A1690_010F6_GF6_01_13484.mzXML	TRUE	2007-06-29	marine metagenome	GAZ:Panama	A1690_010F6_GF6_01_13484.mzXML	0	PAB29JUN07.2 Schizothrix sp.	FALSE	0	ENVO:marine biome	ENVO:sea water	ENVO:organic material	Schizothrix sp.	B	TRUE	TRUE	Schizothrix sp.	cyanobacteria	A1690.010F6.GF6.01.13484	1117	9.61513	-79.5823	UCSD	UCSDMI	TRUE	FALSE	completed	UCSD	cyanobacteria	408172	Cyanobacteria	PAB
10125.A1690.010F7.GF7.01.13485.mzXML	0	A1690_010F7_GF7_01_13485.mzXML	TRUE	2007-06-29	marine metagenome	GAZ:Panama	A1690_010F7_GF7_01_13485.mzXML	0	PAB29JUN07.2 Schizothrix sp.	FALSE	0	ENVO:marine biome	ENVO:sea water	ENVO:organic material	Schizothrix sp.	C	TRUE	TRUE	Schizothrix sp.	cyanobacteria	A1690.010F7.GF7.01.13485	1117	9.61513	-79.5823	UCSD	UCSDMI	TRUE	FALSE	completed	UCSD	cyanobacteria	408172	Cyanobacteria	PAB
10125.A1690.010F8.GF8.01.13486.mzXML	0	A1690_010F8_GF8_01_13486.mzXML	TRUE	2007-06-29	marine metagenome	GAZ:Panama	A1690_010F8_GF8_01_13486.mzXML	0	PAB29JUN07.2 Schizothrix sp.	FALSE	0	ENVO:marine biome	ENVO:sea water	ENVO:organic material	Schizothrix sp.	D	TRUE	TRUE	Schizothrix sp.	cyanobacteria	A1690.010F8.GF8.01.13486	1117	9.61513	-79.5823	UCSD	UCSDMI	TRUE	FALSE	completed	UCSD	cyanobacteria	408172	Cyanobacteria	PAB
10125.A1690.010F9.GF9.01.13487.mzXML	0	A1690_010F9_GF9_01_13487.mzXML	TRUE	2007-06-29	marine metagenome	GAZ:Panama	A1690_010F9_GF9_01_13487.mzXML	0	PAB29JUN07.2 Schizothrix sp.	FALSE	0	ENVO:marine biome	ENVO:sea water	ENVO:organic material	Schizothrix sp.	E	TRUE	TRUE	Schizothrix sp.	cyanobacteria	A1690.010F9.GF9.01.13487	1117	9.61513	-79.5823	UCSD	UCSDMI	TRUE	FALSE	completed	UCSD	cyanobacteria	408172	Cyanobacteria	PAB
10125.A1690.010G2.GG2.01.13490.mzXML	0	A1690_010G2_GG2_01_13490.mzXML	TRUE	2007-06-29	marine metagenome	GAZ:Panama	A1690_010G2_GG2_01_13490.mzXML	0	PAB29JUN07.2 Schizothrix sp.	FALSE	0	ENVO:marine biome	ENVO:sea water	ENVO:organic material	Schizothrix sp.	H	TRUE	TRUE	Schizothrix sp.	cyanobacteria	A1690.010G2.GG2.01.13490	1117	9.61513	-79.5823	UCSD	UCSDMI	TRUE	FALSE	completed	UCSD	cyanobacteria	408172	Cyanobacteria	PAB
10125.A1690.010G3.GG3.01.13491.mzXML	0	A1690_010G3_GG3_01_13491.mzXML	TRUE	2007-06-29	marine metagenome	GAZ:Panama	A1690_010G3_GG3_01_13491.mzXML	0	PAB29JUN07.2 Schizothrix sp.	FALSE	0	ENVO:marine biome	ENVO:sea water	ENVO:organic material	Schizothrix sp.	I	TRUE	TRUE	Schizothrix sp.	cyanobacteria	A1690.010G3.GG3.01.13491	1117	9.61513	-79.5823	UCSD	UCSDMI	TRUE	FALSE	completed	UCSD	cyanobacteria	408172	Cyanobacteria	PAB
10125.A1691.010G10.GG10.01.13499.mzXML	0	A1691_010G10_GG10_01_13499.mzXML	TRUE	2007-08-04	marine metagenome	GAZ:Panama	A1691_010G10_GG10_01_13499.mzXML	0	PAB4AUG07.4B lyngbya semiplena	FALSE	0	ENVO:marine biome	ENVO:sea water	ENVO:organic material	lyngbya semiplena	F	TRUE	TRUE	lyngbya semiplena	cyanobacteria	A1691.010G10.GG10.01.13499	1117	9.28842	-82.1666	UCSD	UCSDMI	TRUE	FALSE	completed	UCSD	cyanobacteria	408172	Cyanobacteria	PAB
10125.A1691.010G11.GG11.01.13500.mzXML	0	A1691_010G11_GG11_01_13500.mzXML	TRUE	2007-08-04	marine metagenome	GAZ:Panama	A1691_010G11_GG11_01_13500.mzXML	0	PAB4AUG07.4B lyngbya semiplena	FALSE	0	ENVO:marine biome	ENVO:sea water	ENVO:organic material	lyngbya semiplena	G	TRUE	TRUE	lyngbya semiplena	cyanobacteria	A1691.010G11.GG11.01.13500	1117	9.28842	-82.1666	UCSD	UCSDMI	TRUE	FALSE	completed	UCSD	cyanobacteria	408172	Cyanobacteria	PAB
10125.A1691.010G4.GG4.01.13493.mzXML	0	A1691_010G4_GG4_01_13493.mzXML	TRUE	2007-08-04	marine metagenome	GAZ:Panama	A1691_010G4_GG4_01_13493.mzXML	0	PAB4AUG07.4B lyngbya semiplena	FALSE	0	ENVO:marine biome	ENVO:sea water	ENVO:organic material	lyngbya semiplena	Crude	TRUE	TRUE	lyngbya semiplena	cyanobacteria	A1691.010G4.GG4.01.13493	1117	9.28842	-82.1666	UCSD	UCSDMI	TRUE	FALSE	completed	UCSD	cyanobacteria	408172	Cyanobacteria	PAB
10125.A1691.010G5.GG5.01.13494.mzXML	0	A1691_010G5_GG5_01_13494.mzXML	TRUE	2007-08-04	marine metagenome	GAZ:Panama	A1691_010G5_GG5_01_13494.mzXML	0	PAB4AUG07.4B lyngbya semiplena	FALSE	0	ENVO:marine biome	ENVO:sea water	ENVO:organic material	lyngbya semiplena	A	TRUE	TRUE	lyngbya semiplena	cyanobacteria	A1691.010G5.GG5.01.13494	1117	9.28842	-82.1666	UCSD	UCSDMI	TRUE	FALSE	completed	UCSD	cyanobacteria	408172	Cyanobacteria	PAB
10125.A1691.010G6.GG6.01.13495.mzXML	0	A1691_010G6_GG6_01_13495.mzXML	TRUE	2007-08-04	marine metagenome	GAZ:Panama	A1691_010G6_GG6_01_13495.mzXML	0	PAB4AUG07.4B lyngbya semiplena	FALSE	0	ENVO:marine biome	ENVO:sea water	ENVO:organic material	lyngbya semiplena	B	TRUE	TRUE	lyngbya semiplena	cyanobacteria	A1691.010G6.GG6.01.13495	1117	9.28842	-82.1666	UCSD	UCSDMI	TRUE	FALSE	completed	UCSD	cyanobacteria	408172	Cyanobacteria	PAB
10125.A1691.010G7.GG7.01.13496.mzXML	0	A1691_010G7_GG7_01_13496.mzXML	TRUE	2007-08-04	marine metagenome	GAZ:Panama	A1691_010G7_GG7_01_13496.mzXML	0	PAB4AUG07.4B lyngbya semiplena	FALSE	0	ENVO:marine biome	ENVO:sea water	ENVO:organic material	lyngbya semiplena	C	TRUE	TRUE	lyngbya semiplena	cyanobacteria	A1691.010G7.GG7.01.13496	1117	9.28842	-82.1666	UCSD	UCSDMI	TRUE	FALSE	completed	UCSD	cyanobacteria	408172	Cyanobacteria	PAB
10125.A1691.010G8.GG8.01.13497.mzXML	0	A1691_010G8_GG8_01_13497.mzXML	TRUE	2007-08-04	marine metagenome	GAZ:Panama	A1691_010G8_GG8_01_13497.mzXML	0	PAB4AUG07.4B lyngbya semiplena	FALSE	0	ENVO:marine biome	ENVO:sea water	ENVO:organic material	lyngbya semiplena	D	TRUE	TRUE	lyngbya semiplena	cyanobacteria	A1691.010G8.GG8.01.13497	1117	9.28842	-82.1666	UCSD	UCSDMI	TRUE	FALSE	completed	UCSD	cyanobacteria	408172	Cyanobacteria	PAB
10125.A1691.010G9.GG9.01.13498.mzXML	0	A1691_010G9_GG9_01_13498.mzXML	TRUE	2007-08-04	marine metagenome	GAZ:Panama	A1691_010G9_GG9_01_13498.mzXML	0	PAB4AUG07.4B lyngbya semiplena	FALSE	0	ENVO:marine biome	ENVO:sea water	ENVO:organic material	lyngbya semiplena	E	TRUE	TRUE	lyngbya semiplena	cyanobacteria	A1691.010G9.GG9.01.13498	1117	9.28842	-82.1666	UCSD	UCSDMI	TRUE	FALSE	completed	UCSD	cyanobacteria	408172	Cyanobacteria	PAB
10125.A1691.010H1.GH1.01.13501.mzXML	0	A1691_010H1_GH1_01_13501.mzXML	TRUE	2007-08-04	marine metagenome	GAZ:Panama	A1691_010H1_GH1_01_13501.mzXML	0	PAB4AUG07.4B lyngbya semiplena	FALSE	0	ENVO:marine biome	ENVO:sea water	ENVO:organic material	lyngbya semiplena	H	TRUE	TRUE	lyngbya semiplena	cyanobacteria	A1691.010H1.GH1.01.13501	1117	9.28842	-82.1666	UCSD	UCSDMI	TRUE	FALSE	completed	UCSD	cyanobacteria	408172	Cyanobacteria	PAB
10125.A1691.010H2.GH2.01.13502.mzXML	0	A1691_010H2_GH2_01_13502.mzXML	TRUE	2007-08-04	marine metagenome	GAZ:Panama	A1691_010H2_GH2_01_13502.mzXML	0	PAB4AUG07.4B lyngbya semiplena	FALSE	0	ENVO:marine biome	ENVO:sea water	ENVO:organic material	lyngbya semiplena	I	TRUE	TRUE	lyngbya semiplena	cyanobacteria	A1691.010H2.GH2.01.13502	1117	9.28842	-82.1666	UCSD	UCSDMI	TRUE	FALSE	completed	UCSD	cyanobacteria	408172	Cyanobacteria	PAB
10125.A1695.011A10.RA10.01.13524.mzXML	0	A1695_011A10_RA10_01_13524.mzXML	TRUE	2007-08-04	marine metagenome	GAZ:Panama	A1695_011A10_RA10_01_13524.mzXML	0	PAB4AUG07.2C white lyngbya	FALSE	0	ENVO:marine biome	ENVO:sea water	ENVO:organic material	white lyngbya	B	TRUE	TRUE	white lyngbya	cyanobacteria	A1695.011A10.RA10.01.13524	1117	9.28842	-82.1666	UCSD	UCSDMI	TRUE	FALSE	completed	UCSD	cyanobacteria	408172	Cyanobacteria	PAB
10125.A1695.011A11.RA11.01.13525.mzXML	0	A1695_011A11_RA11_01_13525.mzXML	TRUE	2007-08-04	marine metagenome	GAZ:Panama	A1695_011A11_RA11_01_13525.mzXML	0	PAB4AUG07.2C white lyngbya	FALSE	0	ENVO:marine biome	ENVO:sea water	ENVO:organic material	white lyngbya	C	TRUE	TRUE	white lyngbya	cyanobacteria	A1695.011A11.RA11.01.13525	1117	9.28842	-82.1666	UCSD	UCSDMI	TRUE	FALSE	completed	UCSD	cyanobacteria	408172	Cyanobacteria	PAB
10125.A1695.011A8.RA8.01.13522.mzXML	0	A1695_011A8_RA8_01_13522.mzXML	TRUE	2007-08-04	marine metagenome	GAZ:Panama	A1695_011A8_RA8_01_13522.mzXML	0	PAB4AUG07.2C white lyngbya	FALSE	0	ENVO:marine biome	ENVO:sea water	ENVO:organic material	white lyngbya	Crude	TRUE	TRUE	white lyngbya	cyanobacteria	A1695.011A8.RA8.01.13522	1117	9.28842	-82.1666	UCSD	UCSDMI	TRUE	FALSE	completed	UCSD	cyanobacteria	408172	Cyanobacteria	PAB
10125.A1695.011A9.RA9.01.13523.mzXML	0	A1695_011A9_RA9_01_13523.mzXML	TRUE	2007-08-04	marine metagenome	GAZ:Panama	A1695_011A9_RA9_01_13523.mzXML	0	PAB4AUG07.2C white lyngbya	FALSE	0	ENVO:marine biome	ENVO:sea water	ENVO:organic material	white lyngbya	A	TRUE	TRUE	white lyngbya	cyanobacteria	A1695.011A9.RA9.01.13523	1117	9.28842	-82.1666	UCSD	UCSDMI	TRUE	FALSE	completed	UCSD	cyanobacteria	408172	Cyanobacteria	PAB
10125.A1695.011B1.RB1.01.13526.mzXML	0	A1695_011B1_RB1_01_13526.mzXML	TRUE	2007-08-04	marine metagenome	GAZ:Panama	A1695_011B1_RB1_01_13526.mzXML	0	PAB4AUG07.2C white lyngbya	FALSE	0	ENVO:marine biome	ENVO:sea water	ENVO:organic material	white lyngbya	D	TRUE	TRUE	white lyngbya	cyanobacteria	A1695.011B1.RB1.01.13526	1117	9.28842	-82.1666	UCSD	UCSDMI	TRUE	FALSE	completed	UCSD	cyanobacteria	408172	Cyanobacteria	PAB
10125.A1695.011B2.RB2.01.13527.mzXML	0	A1695_011B2_RB2_01_13527.mzXML	TRUE	2007-08-04	marine metagenome	GAZ:Panama	A1695_011B2_RB2_01_13527.mzXML	0	PAB4AUG07.2C white lyngbya	FALSE	0	ENVO:marine biome	ENVO:sea water	ENVO:organic material	white lyngbya	E	TRUE	TRUE	white lyngbya	cyanobacteria	A1695.011B2.RB2.01.13527	1117	9.28842	-82.1666	UCSD	UCSDMI	TRUE	FALSE	completed	UCSD	cyanobacteria	408172	Cyanobacteria	PAB
10125.A1695.011B3.RB3.01.13528.mzXML	0	A1695_011B3_RB3_01_13528.mzXML	TRUE	2007-08-04	marine metagenome	GAZ:Panama	A1695_011B3_RB3_01_13528.mzXML	0	PAB4AUG07.2C white lyngbya	FALSE	0	ENVO:marine biome	ENVO:sea water	ENVO:organic material	white lyngbya	F	TRUE	TRUE	white lyngbya	cyanobacteria	A1695.011B3.RB3.01.13528	1117	9.28842	-82.1666	UCSD	UCSDMI	TRUE	FALSE	completed	UCSD	cyanobacteria	408172	Cyanobacteria	PAB
10125.A1695.011B4.RB4.01.13529.mzXML	0	A1695_011B4_RB4_01_13529.mzXML	TRUE	2007-08-04	marine metagenome	GAZ:Panama	A1695_011B4_RB4_01_13529.mzXML	0	PAB4AUG07.2C white lyngbya	FALSE	0	ENVO:marine biome	ENVO:sea water	ENVO:organic material	white lyngbya	G	TRUE	TRUE	white lyngbya	cyanobacteria	A1695.011B4.RB4.01.13529	1117	9.28842	-82.1666	UCSD	UCSDMI	TRUE	FALSE	completed	UCSD	cyanobacteria	408172	Cyanobacteria	PAB
10125.A1695.011B5.RB5.01.13530.mzXML	0	A1695_011B5_RB5_01_13530.mzXML	TRUE	2007-08-04	marine metagenome	GAZ:Panama	A1695_011B5_RB5_01_13530.mzXML	0	PAB4AUG07.2C white lyngbya	FALSE	0	ENVO:marine biome	ENVO:sea water	ENVO:organic material	white lyngbya	I	TRUE	TRUE	white lyngbya	cyanobacteria	A1695.011B5.RB5.01.13530	1117	9.28842	-82.1666	UCSD	UCSDMI	TRUE	FALSE	completed	UCSD	cyanobacteria	408172	Cyanobacteria	PAB
10125.A1696.011B10.RB10.01.13536.mzXML	0	A1696_011B10_RB10_01_13536.mzXML	TRUE	2007-08-04	marine metagenome	GAZ:Panama	A1696_011B10_RB10_01_13536.mzXML	0	PAB4AUG07.2D white lyngbya	FALSE	0	ENVO:marine biome	ENVO:sea water	ENVO:organic material	white lyngbya	G	TRUE	TRUE	white lyngbya	cyanobacteria	A1696.011B10.RB10.01.13536	1117	9.28128	-82.1596	UCSD	UCSDMI	TRUE	FALSE	completed	UCSD	cyanobacteria	408172	Cyanobacteria	PAB
10125.A1696.011B11.RB11.01.13537.mzXML	0	A1696_011B11_RB11_01_13537.mzXML	TRUE	2007-08-04	marine metagenome	GAZ:Panama	A1696_011B11_RB11_01_13537.mzXML	0	PAB4AUG07.2D white lyngbya	FALSE	0	ENVO:marine biome	ENVO:sea water	ENVO:organic material	white lyngbya	H	TRUE	TRUE	white lyngbya	cyanobacteria	A1696.011B11.RB11.01.13537	1117	9.28128	-82.1596	UCSD	UCSDMI	TRUE	FALSE	completed	UCSD	cyanobacteria	408172	Cyanobacteria	PAB
10125.A1696.011B6.RB6.01.13532.mzXML	0	A1696_011B6_RB6_01_13532.mzXML	TRUE	2007-08-04	marine metagenome	GAZ:Panama	A1696_011B6_RB6_01_13532.mzXML	0	PAB4AUG07.2D white lyngbya	FALSE	0	ENVO:marine biome	ENVO:sea water	ENVO:organic material	white lyngbya	Crude	TRUE	TRUE	white lyngbya	cyanobacteria	A1696.011B6.RB6.01.13532	1117	9.28128	-82.1596	UCSD	UCSDMI	TRUE	FALSE	completed	UCSD	cyanobacteria	408172	Cyanobacteria	PAB
10125.A1696.011B7.2.RB7.01.13563.mzXML	0	A1696_011B7_2_RB7_01_13563.mzXML	TRUE	2007-08-04	marine metagenome	GAZ:Panama	A1696_011B7_2_RB7_01_13563.mzXML	0	PAB4AUG07.2D white lyngbya	FALSE	0	ENVO:marine biome	ENVO:sea water	ENVO:organic material	white lyngbya	A	TRUE	TRUE	white lyngbya	cyanobacteria	A1696.011B7.2.RB7.01.13563	1117	9.28128	-82.1596	UCSD	UCSDMI	TRUE	FALSE	completed	UCSD	cyanobacteria	408172	Cyanobacteria	PAB
10125.A1696.011B8.RB8.01.13534.mzXML	0	A1696_011B8_RB8_01_13534.mzXML	TRUE	2007-08-04	marine metagenome	GAZ:Panama	A1696_011B8_RB8_01_13534.mzXML	0	PAB4AUG07.2D white lyngbya	FALSE	0	ENVO:marine biome	ENVO:sea water	ENVO:organic material	white lyngbya	B	TRUE	TRUE	white lyngbya	cyanobacteria	A1696.011B8.RB8.01.13534	1117	9.28128	-82.1596	UCSD	UCSDMI	TRUE	FALSE	completed	UCSD	cyanobacteria	408172	Cyanobacteria	PAB
10125.A1696.011B9.RB9.01.13535.mzXML	0	A1696_011B9_RB9_01_13535.mzXML	TRUE	2007-08-04	marine metagenome	GAZ:Panama	A1696_011B9_RB9_01_13535.mzXML	0	PAB4AUG07.2D white lyngbya	FALSE	0	ENVO:marine biome	ENVO:sea water	ENVO:organic material	white lyngbya	F	TRUE	TRUE	white lyngbya	cyanobacteria	A1696.011B9.RB9.01.13535	1117	9.28128	-82.1596	UCSD	UCSDMI	TRUE	FALSE	completed	UCSD	cyanobacteria	408172	Cyanobacteria	PAB
10125.A1696.011C1.RC1.01.13538.mzXML	0	A1696_011C1_RC1_01_13538.mzXML	TRUE	2007-08-04	marine metagenome	GAZ:Panama	A1696_011C1_RC1_01_13538.mzXML	0	PAB4AUG07.2D white lyngbya	FALSE	0	ENVO:marine biome	ENVO:sea water	ENVO:organic material	white lyngbya	I	TRUE	TRUE	white lyngbya	cyanobacteria	A1696.011C1.RC1.01.13538	1117	9.28128	-82.1596	UCSD	UCSDMI	TRUE	FALSE	completed	UCSD	cyanobacteria	408172	Cyanobacteria	PAB
10125.A1718.011D4.RD4.01.13660.mzXML	0	A1718_011D4_RD4_01_13660.mzXML	TRUE	2007-08-06	marine metagenome	GAZ:Panama	A1718_011D4_RD4_01_13660.mzXML	0	PAB06AUG07.2 schizothrix	FALSE	0	ENVO:marine biome	ENVO:sea water	ENVO:organic material	schizothrix	A	TRUE	TRUE	schizothrix	cyanobacteria	A1718.011D4.RD4.01.13660	1117	9.28842	-82.1666	UCSD	UCSDMI	TRUE	FALSE	completed	UCSD	cyanobacteria	408172	Cyanobacteria	PAB
10125.A1719.011D10.RD10.01.13664.mzXML	0	A1719_011D10_RD10_01_13664.mzXML	TRUE	2007-08-06	marine metagenome	GAZ:Panama	A1719_011D10_RD10_01_13664.mzXML	0	PAB06AUG07.1 Symploca probableschizothrix	FALSE	0	ENVO:marine biome	ENVO:sea water	ENVO:organic material	Symploca probableschizothrix	A	TRUE	TRUE	Symploca probableschizothrix	cyanobacteria	A1719.011D10.RD10.01.13664	1117	9.29528	-82.1835	UCSD	UCSDMI	TRUE	FALSE	completed	UCSD	cyanobacteria	408172	Cyanobacteria	PAB
10125.A1719.011D11.RD11.01.13665.mzXML	0	A1719_011D11_RD11_01_13665.mzXML	TRUE	2007-08-06	marine metagenome	GAZ:Panama	A1719_011D11_RD11_01_13665.mzXML	0	PAB06AUG07.1 Symploca probableschizothrix	FALSE	0	ENVO:marine biome	ENVO:sea water	ENVO:organic material	Symploca probableschizothrix	B	TRUE	TRUE	Symploca probableschizothrix	cyanobacteria	A1719.011D11.RD11.01.13665	1117	9.29528	-82.1835	UCSD	UCSDMI	TRUE	FALSE	completed	UCSD	cyanobacteria	408172	Cyanobacteria	PAB
10125.A1719.011D5.RD5.01.13662.mzXML	0	A1719_011D5_RD5_01_13662.mzXML	TRUE	2007-08-06	marine metagenome	GAZ:Panama	A1719_011D5_RD5_01_13662.mzXML	0	PAB06AUG07.2 schizothrix	FALSE	0	ENVO:marine biome	ENVO:sea water	ENVO:organic material	schizothrix	B	TRUE	TRUE	schizothrix	cyanobacteria	A1719.011D5.RD5.01.13662	1117	9.28842	-82.1666	UCSD	UCSDMI	TRUE	FALSE	completed	UCSD	cyanobacteria	408172	Cyanobacteria	PAB
10125.A1719.011D9.RD9.01.13663.mzXML	0	A1719_011D9_RD9_01_13663.mzXML	TRUE	2007-08-06	marine metagenome	GAZ:Panama	A1719_011D9_RD9_01_13663.mzXML	0	PAB06AUG07.1 Symploca probableschizothrix	FALSE	0	ENVO:marine biome	ENVO:sea water	ENVO:organic material	Symploca probableschizothrix	Crude	TRUE	TRUE	Symploca probableschizothrix	cyanobacteria	A1719.011D9.RD9.01.13663	1117	9.29528	-82.1835	UCSD	UCSDMI	TRUE	FALSE	completed	UCSD	cyanobacteria	408172	Cyanobacteria	PAB
10125.A1719.011E1.RE1.01.13666.mzXML	0	A1719_011E1_RE1_01_13666.mzXML	TRUE	2007-08-06	marine metagenome	GAZ:Panama	A1719_011E1_RE1_01_13666.mzXML	0	PAB06AUG07.1 Symploca probableschizothrix	FALSE	0	ENVO:marine biome	ENVO:sea water	ENVO:organic material	Symploca probableschizothrix	C	TRUE	TRUE	Symploca probableschizothrix	cyanobacteria	A1719.011E1.RE1.01.13666	1117	9.29528	-82.1835	UCSD	UCSDMI	TRUE	FALSE	completed	UCSD	cyanobacteria	408172	Cyanobacteria	PAB
10125.A1719.011E2.RE2.01.13667.mzXML	0	A1719_011E2_RE2_01_13667.mzXML	TRUE	2007-08-06	marine metagenome	GAZ:Panama	A1719_011E2_RE2_01_13667.mzXML	0	PAB06AUG07.1 Symploca probableschizothrix	FALSE	0	ENVO:marine biome	ENVO:sea water	ENVO:organic material	Symploca probableschizothrix	D	TRUE	TRUE	Symploca probableschizothrix	cyanobacteria	A1719.011E2.RE2.01.13667	1117	9.29528	-82.1835	UCSD	UCSDMI	TRUE	FALSE	completed	UCSD	cyanobacteria	408172	Cyanobacteria	PAB
10125.A1719.011E4.RE4.01.13669.mzXML	0	A1719_011E4_RE4_01_13669.mzXML	TRUE	2007-08-06	marine metagenome	GAZ:Panama	A1719_011E4_RE4_01_13669.mzXML	0	PAB06AUG07.1 Symploca probableschizothrix	FALSE	0	ENVO:marine biome	ENVO:sea water	ENVO:organic material	Symploca probableschizothrix	E	TRUE	TRUE	Symploca probableschizothrix	cyanobacteria	A1719.011E4.RE4.01.13669	1117	9.29528	-82.1835	UCSD	UCSDMI	TRUE	FALSE	completed	UCSD	cyanobacteria	408172	Cyanobacteria	PAB
10125.A1719.011E5.RE5.01.13670.mzXML	0	A1719_011E5_RE5_01_13670.mzXML	TRUE	2007-08-06	marine metagenome	GAZ:Panama	A1719_011E5_RE5_01_13670.mzXML	0	PAB06AUG07.1 Symploca probableschizothrix	FALSE	0	ENVO:marine biome	ENVO:sea water	ENVO:organic material	Symploca probableschizothrix	F	TRUE	TRUE	Symploca probableschizothrix	cyanobacteria	A1719.011E5.RE5.01.13670	1117	9.29528	-82.1835	UCSD	UCSDMI	TRUE	FALSE	completed	UCSD	cyanobacteria	408172	Cyanobacteria	PAB
10125.A1719.011E6.RE6.01.13671.mzXML	0	A1719_011E6_RE6_01_13671.mzXML	TRUE	2007-08-06	marine metagenome	GAZ:Panama	A1719_011E6_RE6_01_13671.mzXML	0	PAB06AUG07.1 Symploca probableschizothrix	FALSE	0	ENVO:marine biome	ENVO:sea water	ENVO:organic material	Symploca probableschizothrix	G	TRUE	TRUE	Symploca probableschizothrix	cyanobacteria	A1719.011E6.RE6.01.13671	1117	9.29528	-82.1835	UCSD	UCSDMI	TRUE	FALSE	completed	UCSD	cyanobacteria	408172	Cyanobacteria	PAB
10125.A1719.011E7.RE7.01.13672.mzXML	0	A1719_011E7_RE7_01_13672.mzXML	TRUE	2007-08-06	marine metagenome	GAZ:Panama	A1719_011E7_RE7_01_13672.mzXML	0	PAB06AUG07.1 Symploca probableschizothrix	FALSE	0	ENVO:marine biome	ENVO:sea water	ENVO:organic material	Symploca probableschizothrix	H	TRUE	TRUE	Symploca probableschizothrix	cyanobacteria	A1719.011E7.RE7.01.13672	1117	9.29528	-82.1835	UCSD	UCSDMI	TRUE	FALSE	completed	UCSD	cyanobacteria	408172	Cyanobacteria	PAB
10125.A1725.012F5.GF5.01.13694.mzXML	0	A1725_012F5_GF5_01_13694.mzXML	TRUE	2007-08-04	marine metagenome	GAZ:Panama	A1725_012F5_GF5_01_13694.mzXML	0	PAB04AUG07.2B white lyngbya	FALSE	0	ENVO:marine biome	ENVO:sea water	ENVO:organic material	white lyngbya	A	TRUE	TRUE	white lyngbya	cyanobacteria	A1725.012F5.GF5.01.13694	1117	9.29528	-82.1835	UCSD	UCSDMI	TRUE	FALSE	completed	UCSD	cyanobacteria	408172	Cyanobacteria	PAB
10125.A1725.012F6.GF6.01.13695.mzXML	0	A1725_012F6_GF6_01_13695.mzXML	TRUE	2007-08-04	marine metagenome	GAZ:Panama	A1725_012F6_GF6_01_13695.mzXML	0	PAB04AUG07.2B white lyngbya	FALSE	0	ENVO:marine biome	ENVO:sea water	ENVO:organic material	white lyngbya	B	TRUE	TRUE	white lyngbya	cyanobacteria	A1725.012F6.GF6.01.13695	1117	9.29528	-82.1835	UCSD	UCSDMI	TRUE	FALSE	completed	UCSD	cyanobacteria	408172	Cyanobacteria	PAB
10125.A1725.012F7.GF7.01.13696.mzXML	0	A1725_012F7_GF7_01_13696.mzXML	TRUE	2007-08-04	marine metagenome	GAZ:Panama	A1725_012F7_GF7_01_13696.mzXML	0	PAB04AUG07.2B white lyngbya	FALSE	0	ENVO:marine biome	ENVO:sea water	ENVO:organic material	white lyngbya	C	TRUE	TRUE	white lyngbya	cyanobacteria	A1725.012F7.GF7.01.13696	1117	9.29528	-82.1835	UCSD	UCSDMI	TRUE	FALSE	completed	UCSD	cyanobacteria	408172	Cyanobacteria	PAB
10125.A1725.012F8.GF8.01.13697.mzXML	0	A1725_012F8_GF8_01_13697.mzXML	TRUE	2007-08-04	marine metagenome	GAZ:Panama	A1725_012F8_GF8_01_13697.mzXML	0	PAB04AUG07.2B white lyngbya	FALSE	0	ENVO:marine biome	ENVO:sea water	ENVO:organic material	white lyngbya	D	TRUE	TRUE	white lyngbya	cyanobacteria	A1725.012F8.GF8.01.13697	1117	9.29528	-82.1835	UCSD	UCSDMI	TRUE	FALSE	completed	UCSD	cyanobacteria	408172	Cyanobacteria	PAB
10125.A1725.012F9.GF9.01.13698.mzXML	0	A1725_012F9_GF9_01_13698.mzXML	TRUE	2007-08-04	marine metagenome	GAZ:Panama	A1725_012F9_GF9_01_13698.mzXML	0	PAB04AUG07.2B white lyngbya	FALSE	0	ENVO:marine biome	ENVO:sea water	ENVO:organic material	white lyngbya	E	TRUE	TRUE	white lyngbya	cyanobacteria	A1725.012F9.GF9.01.13698	1117	9.29528	-82.1835	UCSD	UCSDMI	TRUE	FALSE	completed	UCSD	cyanobacteria	408172	Cyanobacteria	PAB
10125.A1725.012G1.GG1.01.13701.mzXML	0	A1725_012G1_GG1_01_13701.mzXML	TRUE	2007-08-04	marine metagenome	GAZ:Panama	A1725_012G1_GG1_01_13701.mzXML	0	PAB04AUG07.2B white lyngbya	FALSE	0	ENVO:marine biome	ENVO:sea water	ENVO:organic material	white lyngbya	I	TRUE	TRUE	white lyngbya	cyanobacteria	A1725.012G1.GG1.01.13701	1117	9.29528	-82.1835	UCSD	UCSDMI	TRUE	FALSE	completed	UCSD	cyanobacteria	408172	Cyanobacteria	PAB
10125.A1726.012G2.GG2.01.13703.mzXML	0	A1726_012G2_GG2_01_13703.mzXML	TRUE	2007-03-06	marine metagenome	GAZ:Panama	A1726_012G2_GG2_01_13703.mzXML	0	PAB06MAR07.1 lyngbya semiplena	FALSE	0	ENVO:marine biome	ENVO:sea water	ENVO:organic material	lyngbya semiplena	A	TRUE	TRUE	lyngbya semiplena	cyanobacteria	A1726.012G2.GG2.01.13703	1117	9.26997	-82.1834	UCSD	UCSDMI	TRUE	FALSE	completed	UCSD	cyanobacteria	408172	Cyanobacteria	PAB
10125.A1726.012G3.GG3.01.13704.mzXML	0	A1726_012G3_GG3_01_13704.mzXML	TRUE	2007-03-06	marine metagenome	GAZ:Panama	A1726_012G3_GG3_01_13704.mzXML	0	PAB06MAR07.1 lyngbya semiplena	FALSE	0	ENVO:marine biome	ENVO:sea water	ENVO:organic material	lyngbya semiplena	B	TRUE	TRUE	lyngbya semiplena	cyanobacteria	A1726.012G3.GG3.01.13704	1117	9.26997	-82.1834	UCSD	UCSDMI	TRUE	FALSE	completed	UCSD	cyanobacteria	408172	Cyanobacteria	PAB
10125.A1726.012G4.GG4.01.13705.mzXML	0	A1726_012G4_GG4_01_13705.mzXML	TRUE	2007-03-06	marine metagenome	GAZ:Panama	A1726_012G4_GG4_01_13705.mzXML	0	PAB06MAR07.1 lyngbya semiplena	FALSE	0	ENVO:marine biome	ENVO:sea water	ENVO:organic material	lyngbya semiplena	C	TRUE	TRUE	lyngbya semiplena	cyanobacteria	A1726.012G4.GG4.01.13705	1117	9.26997	-82.1834	UCSD	UCSDMI	TRUE	FALSE	completed	UCSD	cyanobacteria	408172	Cyanobacteria	PAB
10125.A1726.012G5.GG5.01.13706.mzXML	0	A1726_012G5_GG5_01_13706.mzXML	TRUE	2007-03-06	marine metagenome	GAZ:Panama	A1726_012G5_GG5_01_13706.mzXML	0	PAB06MAR07.1 lyngbya semiplena	FALSE	0	ENVO:marine biome	ENVO:sea water	ENVO:organic material	lyngbya semiplena	D	TRUE	TRUE	lyngbya semiplena	cyanobacteria	A1726.012G5.GG5.01.13706	1117	9.26997	-82.1834	UCSD	UCSDMI	TRUE	FALSE	completed	UCSD	cyanobacteria	408172	Cyanobacteria	PAB
10125.A1726.012G6.GG6.01.13707.mzXML	0	A1726_012G6_GG6_01_13707.mzXML	TRUE	2007-03-06	marine metagenome	GAZ:Panama	A1726_012G6_GG6_01_13707.mzXML	0	PAB06MAR07.1 lyngbya semiplena	FALSE	0	ENVO:marine biome	ENVO:sea water	ENVO:organic material	lyngbya semiplena	E	TRUE	TRUE	lyngbya semiplena	cyanobacteria	A1726.012G6.GG6.01.13707	1117	9.26997	-82.1834	UCSD	UCSDMI	TRUE	FALSE	completed	UCSD	cyanobacteria	408172	Cyanobacteria	PAB
10125.A1726.012G7.GG7.01.13708.mzXML	0	A1726_012G7_GG7_01_13708.mzXML	TRUE	2007-03-06	marine metagenome	GAZ:Panama	A1726_012G7_GG7_01_13708.mzXML	0	PAB06MAR07.1 lyngbya semiplena	FALSE	0	ENVO:marine biome	ENVO:sea water	ENVO:organic material	lyngbya semiplena	F	TRUE	TRUE	lyngbya semiplena	cyanobacteria	A1726.012G7.GG7.01.13708	1117	9.26997	-82.1834	UCSD	UCSDMI	TRUE	FALSE	completed	UCSD	cyanobacteria	408172	Cyanobacteria	PAB
10125.A1726.012G8.GG8.01.13709.mzXML	0	A1726_012G8_GG8_01_13709.mzXML	TRUE	2007-03-06	marine metagenome	GAZ:Panama	A1726_012G8_GG8_01_13709.mzXML	0	PAB06MAR07.1 lyngbya semiplena	FALSE	0	ENVO:marine biome	ENVO:sea water	ENVO:organic material	lyngbya semiplena	G	TRUE	TRUE	lyngbya semiplena	cyanobacteria	A1726.012G8.GG8.01.13709	1117	9.26997	-82.1834	UCSD	UCSDMI	TRUE	FALSE	completed	UCSD	cyanobacteria	408172	Cyanobacteria	PAB
10125.A1726.012G9.GG9.01.13710.mzXML	0	A1726_012G9_GG9_01_13710.mzXML	TRUE	2007-03-06	marine metagenome	GAZ:Panama	A1726_012G9_GG9_01_13710.mzXML	0	PAB06MAR07.1 lyngbya semiplena	FALSE	0	ENVO:marine biome	ENVO:sea water	ENVO:organic material	lyngbya semiplena	I	TRUE	TRUE	lyngbya semiplena	cyanobacteria	A1726.012G9.GG9.01.13710	1117	9.26997	-82.1834	UCSD	UCSDMI	TRUE	FALSE	completed	UCSD	cyanobacteria	408172	Cyanobacteria	PAB
10125.A1726.013H5.RH5.01.13833.mzXML	0	A1726_013H5_RH5_01_13833.mzXML	TRUE	2007-03-06	marine metagenome	GAZ:Panama	A1726_013H5_RH5_01_13833.mzXML	0	PAB06MAR07.1 lyngbya semiplena	FALSE	0	ENVO:marine biome	ENVO:sea water	ENVO:organic material	lyngbya semiplena	H	TRUE	TRUE	lyngbya semiplena	cyanobacteria	A1726.013H5.RH5.01.13833	1117	9.26997	-82.1834	UCSD	UCSDMI	TRUE	FALSE	completed	UCSD	cyanobacteria	408172	Cyanobacteria	PAB
10125.A1728.012H10.GH10.01.13725.mzXML	0	A1728_012H10_GH10_01_13725.mzXML	TRUE	2006-07-28	marine metagenome	GAZ:Panama	A1728_012H10_GH10_01_13725.mzXML	0	PAB28JUL06.3 red lyngbya	FALSE	0	ENVO:marine biome	ENVO:sea water	ENVO:organic material	red lyngbya	D	TRUE	TRUE	red lyngbya	cyanobacteria	A1728.012H10.GH10.01.13725	1117	9.25433	-82.1622	UCSD	UCSDMI	TRUE	FALSE	completed	UCSD	cyanobacteria	408172	Cyanobacteria	PAB
10125.A1728.012H11.3.GH11.01.13728.mzXML	0	A1728_012H11_3_GH11_01_13728.mzXML	TRUE	2006-07-28	marine metagenome	GAZ:Panama	A1728_012H11_3_GH11_01_13728.mzXML	0	PAB28JUL06.3 red lyngbya	FALSE	0	ENVO:marine biome	ENVO:sea water	ENVO:organic material	red lyngbya	E	TRUE	TRUE	red lyngbya	cyanobacteria	A1728.012H11.3.GH11.01.13728	1117	9.25433	-82.1622	UCSD	UCSDMI	TRUE	FALSE	completed	UCSD	cyanobacteria	408172	Cyanobacteria	PAB
10125.A1728.012H6.GH6.01.13720.mzXML	0	A1728_012H6_GH6_01_13720.mzXML	TRUE	2006-07-28	marine metagenome	GAZ:Panama	A1728_012H6_GH6_01_13720.mzXML	0	PAB28JUL06.3 red lyngbya	FALSE	0	ENVO:marine biome	ENVO:sea water	ENVO:organic material	red lyngbya	Crude	TRUE	TRUE	red lyngbya	cyanobacteria	A1728.012H6.GH6.01.13720	1117	9.25433	-82.1622	UCSD	UCSDMI	TRUE	FALSE	completed	UCSD	cyanobacteria	408172	Cyanobacteria	PAB
10125.A1728.012H7.GH7.01.13721.mzXML	0	A1728_012H7_GH7_01_13721.mzXML	TRUE	2006-07-28	marine metagenome	GAZ:Panama	A1728_012H7_GH7_01_13721.mzXML	0	PAB28JUL06.3 red lyngbya	FALSE	0	ENVO:marine biome	ENVO:sea water	ENVO:organic material	red lyngbya	A	TRUE	TRUE	red lyngbya	cyanobacteria	A1728.012H7.GH7.01.13721	1117	9.25433	-82.1622	UCSD	UCSDMI	TRUE	FALSE	completed	UCSD	cyanobacteria	408172	Cyanobacteria	PAB
10125.A1728.012H8.GH8.01.13722.mzXML	0	A1728_012H8_GH8_01_13722.mzXML	TRUE	2006-07-28	marine metagenome	GAZ:Panama	A1728_012H8_GH8_01_13722.mzXML	0	PAB28JUL06.3 red lyngbya	FALSE	0	ENVO:marine biome	ENVO:sea water	ENVO:organic material	red lyngbya	B	TRUE	TRUE	red lyngbya	cyanobacteria	A1728.012H8.GH8.01.13722	1117	9.25433	-82.1622	UCSD	UCSDMI	TRUE	FALSE	completed	UCSD	cyanobacteria	408172	Cyanobacteria	PAB
10125.A1728.012H9.GH9.01.13723.mzXML	0	A1728_012H9_GH9_01_13723.mzXML	TRUE	2006-07-28	marine metagenome	GAZ:Panama	A1728_012H9_GH9_01_13723.mzXML	0	PAB28JUL06.3 red lyngbya	FALSE	0	ENVO:marine biome	ENVO:sea water	ENVO:organic material	red lyngbya	C	TRUE	TRUE	red lyngbya	cyanobacteria	A1728.012H9.GH9.01.13723	1117	9.25433	-82.1622	UCSD	UCSDMI	TRUE	FALSE	completed	UCSD	cyanobacteria	408172	Cyanobacteria	PAB
10125.A1728.013A1.RA1.01.13729.mzXML	0	A1728_013A1_RA1_01_13729.mzXML	TRUE	2006-07-28	marine metagenome	GAZ:Panama	A1728_013A1_RA1_01_13729.mzXML	0	PAB28JUL06.3 red lyngbya	FALSE	0	ENVO:marine biome	ENVO:sea water	ENVO:organic material	red lyngbya	F	TRUE	TRUE	red lyngbya	cyanobacteria	A1728.013A1.RA1.01.13729	1117	9.25433	-82.1622	UCSD	UCSDMI	TRUE	FALSE	completed	UCSD	cyanobacteria	408172	Cyanobacteria	PAB
10125.A1728.013A2.RA2.01.13730.mzXML	0	A1728_013A2_RA2_01_13730.mzXML	TRUE	2006-07-28	marine metagenome	GAZ:Panama	A1728_013A2_RA2_01_13730.mzXML	0	PAB28JUL06.3 red lyngbya	FALSE	0	ENVO:marine biome	ENVO:sea water	ENVO:organic material	red lyngbya	G	TRUE	TRUE	red lyngbya	cyanobacteria	A1728.013A2.RA2.01.13730	1117	9.25433	-82.1622	UCSD	UCSDMI	TRUE	FALSE	completed	UCSD	cyanobacteria	408172	Cyanobacteria	PAB
10125.A1728.013A3.RA3.01.13731.mzXML	0	A1728_013A3_RA3_01_13731.mzXML	TRUE	2006-07-28	marine metagenome	GAZ:Panama	A1728_013A3_RA3_01_13731.mzXML	0	PAB28JUL06.3 red lyngbya	FALSE	0	ENVO:marine biome	ENVO:sea water	ENVO:organic material	red lyngbya	H	TRUE	TRUE	red lyngbya	cyanobacteria	A1728.013A3.RA3.01.13731	1117	9.25433	-82.1622	UCSD	UCSDMI	TRUE	FALSE	completed	UCSD	cyanobacteria	408172	Cyanobacteria	PAB
10125.A1728.013A4.RA4.01.13732.mzXML	0	A1728_013A4_RA4_01_13732.mzXML	TRUE	2006-07-28	marine metagenome	GAZ:Panama	A1728_013A4_RA4_01_13732.mzXML	0	PAB28JUL06.3 red lyngbya	FALSE	0	ENVO:marine biome	ENVO:sea water	ENVO:organic material	red lyngbya	I	TRUE	TRUE	red lyngbya	cyanobacteria	A1728.013A4.RA4.01.13732	1117	9.25433	-82.1622	UCSD	UCSDMI	TRUE	FALSE	completed	UCSD	cyanobacteria	408172	Cyanobacteria	PAB
10125.A1730.013B10.RB10.01.13760.mzXML	0	A1730_013B10_RB10_01_13760.mzXML	TRUE	2005-11-03	marine metagenome	GAZ:Panama	A1730_013B10_RB10_01_13760.mzXML	0	PAB03NOV05.5 seagrass	FALSE	0	ENVO:marine biome	ENVO:sea water	ENVO:organic material	seagrass	H	TRUE	TRUE	seagrass	seagrass	A1730.013B10.RB10.01.13760	408172	9.28218	-82.177	UCSD	UCSDMI	TRUE	FALSE	completed	UCSD	cyanobacteria	408172	Cyanobacteria	PAB
10125.A1730.013B11.RB11.01.13761.mzXML	0	A1730_013B11_RB11_01_13761.mzXML	TRUE	2005-11-03	marine metagenome	GAZ:Panama	A1730_013B11_RB11_01_13761.mzXML	0	PAB03NOV05.5 seagrass	FALSE	0	ENVO:marine biome	ENVO:sea water	ENVO:organic material	seagrass	I	TRUE	TRUE	seagrass	seagrass	A1730.013B11.RB11.01.13761	408172	9.28218	-82.177	UCSD	UCSDMI	TRUE	FALSE	completed	UCSD	cyanobacteria	408172	Cyanobacteria	PAB
10125.A1730.013B2.RB2.01.13752.mzXML	0	A1730_013B2_RB2_01_13752.mzXML	TRUE	2005-11-03	marine metagenome	GAZ:Panama	A1730_013B2_RB2_01_13752.mzXML	0	PAB03NOV05.5 seagrass	FALSE	0	ENVO:marine biome	ENVO:sea water	ENVO:organic material	seagrass	Crude	TRUE	TRUE	seagrass	seagrass	A1730.013B2.RB2.01.13752	408172	9.28218	-82.177	UCSD	UCSDMI	TRUE	FALSE	completed	UCSD	cyanobacteria	408172	Cyanobacteria	PAB
10125.A1730.013B3.RB3.01.13753.mzXML	0	A1730_013B3_RB3_01_13753.mzXML	TRUE	2005-11-03	marine metagenome	GAZ:Panama	A1730_013B3_RB3_01_13753.mzXML	0	PAB03NOV05.5 seagrass	FALSE	0	ENVO:marine biome	ENVO:sea water	ENVO:organic material	seagrass	A	TRUE	TRUE	seagrass	seagrass	A1730.013B3.RB3.01.13753	408172	9.28218	-82.177	UCSD	UCSDMI	TRUE	FALSE	completed	UCSD	cyanobacteria	408172	Cyanobacteria	PAB
10125.A1730.013B4.RB4.01.13754.mzXML	0	A1730_013B4_RB4_01_13754.mzXML	TRUE	2005-11-03	marine metagenome	GAZ:Panama	A1730_013B4_RB4_01_13754.mzXML	0	PAB03NOV05.5 seagrass	FALSE	0	ENVO:marine biome	ENVO:sea water	ENVO:organic material	seagrass	B	TRUE	TRUE	seagrass	seagrass	A1730.013B4.RB4.01.13754	408172	9.28218	-82.177	UCSD	UCSDMI	TRUE	FALSE	completed	UCSD	cyanobacteria	408172	Cyanobacteria	PAB
10125.A1730.013B5.RB5.01.13755.mzXML	0	A1730_013B5_RB5_01_13755.mzXML	TRUE	2005-11-03	marine metagenome	GAZ:Panama	A1730_013B5_RB5_01_13755.mzXML	0	PAB03NOV05.5 seagrass	FALSE	0	ENVO:marine biome	ENVO:sea water	ENVO:organic material	seagrass	C	TRUE	TRUE	seagrass	seagrass	A1730.013B5.RB5.01.13755	408172	9.28218	-82.177	UCSD	UCSDMI	TRUE	FALSE	completed	UCSD	cyanobacteria	408172	Cyanobacteria	PAB
10125.A1730.013B6.RB6.01.13756.mzXML	0	A1730_013B6_RB6_01_13756.mzXML	TRUE	2005-11-03	marine metagenome	GAZ:Panama	A1730_013B6_RB6_01_13756.mzXML	0	PAB03NOV05.5 seagrass	FALSE	0	ENVO:marine biome	ENVO:sea water	ENVO:organic material	seagrass	D	TRUE	TRUE	seagrass	seagrass	A1730.013B6.RB6.01.13756	408172	9.28218	-82.177	UCSD	UCSDMI	TRUE	FALSE	completed	UCSD	cyanobacteria	408172	Cyanobacteria	PAB
10125.A1730.013B7.RB7.01.13757.mzXML	0	A1730_013B7_RB7_01_13757.mzXML	TRUE	2005-11-03	marine metagenome	GAZ:Panama	A1730_013B7_RB7_01_13757.mzXML	0	PAB03NOV05.5 seagrass	FALSE	0	ENVO:marine biome	ENVO:sea water	ENVO:organic material	seagrass	E	TRUE	TRUE	seagrass	seagrass	A1730.013B7.RB7.01.13757	408172	9.28218	-82.177	UCSD	UCSDMI	TRUE	FALSE	completed	UCSD	cyanobacteria	408172	Cyanobacteria	PAB
10125.A1730.013B8.RB8.01.13758.mzXML	0	A1730_013B8_RB8_01_13758.mzXML	TRUE	2005-11-03	marine metagenome	GAZ:Panama	A1730_013B8_RB8_01_13758.mzXML	0	PAB03NOV05.5 seagrass	FALSE	0	ENVO:marine biome	ENVO:sea water	ENVO:organic material	seagrass	F	TRUE	TRUE	seagrass	seagrass	A1730.013B8.RB8.01.13758	408172	9.28218	-82.177	UCSD	UCSDMI	TRUE	FALSE	completed	UCSD	cyanobacteria	408172	Cyanobacteria	PAB
10125.A1730.013B9.RB9.01.13759.mzXML	0	A1730_013B9_RB9_01_13759.mzXML	TRUE	2005-11-03	marine metagenome	GAZ:Panama	A1730_013B9_RB9_01_13759.mzXML	0	PAB03NOV05.5 seagrass	FALSE	0	ENVO:marine biome	ENVO:sea water	ENVO:organic material	seagrass	G	TRUE	TRUE	seagrass	seagrass	A1730.013B9.RB9.01.13759	408172	9.28218	-82.177	UCSD	UCSDMI	TRUE	FALSE	completed	UCSD	cyanobacteria	408172	Cyanobacteria	PAB
10125.A1731.013C1.RC1.01.13763.mzXML	0	A1731_013C1_RC1_01_13763.mzXML	TRUE	2007-11-16	marine metagenome	GAZ:Panama	A1731_013C1_RC1_01_13763.mzXML	0	PAB16NOV07.5B Lyngbya semiplena	FALSE	0	ENVO:marine biome	ENVO:sea water	ENVO:organic material	Lyngbya semiplena	Crude	TRUE	TRUE	Lyngbya semiplena	cyanobacteria	A1731.013C1.RC1.01.13763	1117	9.29857	-82.2026	UCSD	UCSDMI	TRUE	FALSE	completed	UCSD	cyanobacteria	408172	Cyanobacteria	PAB
10125.A1731.013C10.RC10.01.15583.mzXML	0	A1731_013C10_RC10_01_15583.mzXML	TRUE	2007-11-16	marine metagenome	GAZ:Panama	A1731_013C10_RC10_01_15583.mzXML	0	PAB16NOV07.5B Lyngbya semiplena	FALSE	0	ENVO:marine biome	ENVO:sea water	ENVO:organic material	Lyngbya semiplena	I	TRUE	TRUE	Lyngbya semiplena	cyanobacteria	A1731.013C10.RC10.01.15583	1117	9.29857	-82.2026	UCSD	UCSDMI	TRUE	FALSE	completed	UCSD	cyanobacteria	408172	Cyanobacteria	PAB
10125.A1731.013C2.RC2.01.13764.mzXML	0	A1731_013C2_RC2_01_13764.mzXML	TRUE	2007-11-16	marine metagenome	GAZ:Panama	A1731_013C2_RC2_01_13764.mzXML	0	PAB16NOV07.5B Lyngbya semiplena	FALSE	0	ENVO:marine biome	ENVO:sea water	ENVO:organic material	Lyngbya semiplena	A	TRUE	TRUE	Lyngbya semiplena	cyanobacteria	A1731.013C2.RC2.01.13764	1117	9.29857	-82.2026	UCSD	UCSDMI	TRUE	FALSE	completed	UCSD	cyanobacteria	408172	Cyanobacteria	PAB
10125.A1731.013C3.RC3.01.13765.mzXML	0	A1731_013C3_RC3_01_13765.mzXML	TRUE	2007-11-16	marine metagenome	GAZ:Panama	A1731_013C3_RC3_01_13765.mzXML	0	PAB16NOV07.5B Lyngbya semiplena	FALSE	0	ENVO:marine biome	ENVO:sea water	ENVO:organic material	Lyngbya semiplena	B	TRUE	TRUE	Lyngbya semiplena	cyanobacteria	A1731.013C3.RC3.01.13765	1117	9.29857	-82.2026	UCSD	UCSDMI	TRUE	FALSE	completed	UCSD	cyanobacteria	408172	Cyanobacteria	PAB
10125.A1731.013C4.RC4.01.13766.mzXML	0	A1731_013C4_RC4_01_13766.mzXML	TRUE	2007-11-16	marine metagenome	GAZ:Panama	A1731_013C4_RC4_01_13766.mzXML	0	PAB16NOV07.5B Lyngbya semiplena	FALSE	0	ENVO:marine biome	ENVO:sea water	ENVO:organic material	Lyngbya semiplena	C	TRUE	TRUE	Lyngbya semiplena	cyanobacteria	A1731.013C4.RC4.01.13766	1117	9.29857	-82.2026	UCSD	UCSDMI	TRUE	FALSE	completed	UCSD	cyanobacteria	408172	Cyanobacteria	PAB
10125.A1731.013C5.RC5.01.13767.mzXML	0	A1731_013C5_RC5_01_13767.mzXML	TRUE	2007-11-16	marine metagenome	GAZ:Panama	A1731_013C5_RC5_01_13767.mzXML	0	PAB16NOV07.5B Lyngbya semiplena	FALSE	0	ENVO:marine biome	ENVO:sea water	ENVO:organic material	Lyngbya semiplena	D	TRUE	TRUE	Lyngbya semiplena	cyanobacteria	A1731.013C5.RC5.01.13767	1117	9.29857	-82.2026	UCSD	UCSDMI	TRUE	FALSE	completed	UCSD	cyanobacteria	408172	Cyanobacteria	PAB
10125.A1731.013C6.RC6.01.13768.mzXML	0	A1731_013C6_RC6_01_13768.mzXML	TRUE	2007-11-16	marine metagenome	GAZ:Panama	A1731_013C6_RC6_01_13768.mzXML	0	PAB16NOV07.5B Lyngbya semiplena	FALSE	0	ENVO:marine biome	ENVO:sea water	ENVO:organic material	Lyngbya semiplena	E	TRUE	TRUE	Lyngbya semiplena	cyanobacteria	A1731.013C6.RC6.01.13768	1117	9.29857	-82.2026	UCSD	UCSDMI	TRUE	FALSE	completed	UCSD	cyanobacteria	408172	Cyanobacteria	PAB
10125.A1731.013C7.RC7.01.15580.mzXML	0	A1731_013C7_RC7_01_15580.mzXML	TRUE	2007-11-16	marine metagenome	GAZ:Panama	A1731_013C7_RC7_01_15580.mzXML	0	PAB16NOV07.5B Lyngbya semiplena	FALSE	0	ENVO:marine biome	ENVO:sea water	ENVO:organic material	Lyngbya semiplena	F	TRUE	TRUE	Lyngbya semiplena	cyanobacteria	A1731.013C7.RC7.01.15580	1117	9.29857	-82.2026	UCSD	UCSDMI	TRUE	FALSE	completed	UCSD	cyanobacteria	408172	Cyanobacteria	PAB
10125.A1731.013C8.RC8.01.15581.mzXML	0	A1731_013C8_RC8_01_15581.mzXML	TRUE	2007-11-16	marine metagenome	GAZ:Panama	A1731_013C8_RC8_01_15581.mzXML	0	PAB16NOV07.5B Lyngbya semiplena	FALSE	0	ENVO:marine biome	ENVO:sea water	ENVO:organic material	Lyngbya semiplena	G	TRUE	TRUE	Lyngbya semiplena	cyanobacteria	A1731.013C8.RC8.01.15581	1117	9.29857	-82.2026	UCSD	UCSDMI	TRUE	FALSE	completed	UCSD	cyanobacteria	408172	Cyanobacteria	PAB
10125.A1731.013C9.RC9.01.15582.mzXML	0	A1731_013C9_RC9_01_15582.mzXML	TRUE	2007-11-16	marine metagenome	GAZ:Panama	A1731_013C9_RC9_01_15582.mzXML	0	PAB16NOV07.5B Lyngbya semiplena	FALSE	0	ENVO:marine biome	ENVO:sea water	ENVO:organic material	Lyngbya semiplena	H	TRUE	TRUE	Lyngbya semiplena	cyanobacteria	A1731.013C9.RC9.01.15582	1117	9.29857	-82.2026	UCSD	UCSDMI	TRUE	FALSE	completed	UCSD	cyanobacteria	408172	Cyanobacteria	PAB
10125.A1732.013C11.RC11.01.15586.mzXML	0	A1732_013C11_RC11_01_15586.mzXML	TRUE	2007-11-16	marine metagenome	GAZ:Panama	A1732_013C11_RC11_01_15586.mzXML	0	PAB16NOV07.7A calothryx sp	FALSE	0	ENVO:marine biome	ENVO:sea water	ENVO:organic material	calothryx sp	Crude	TRUE	TRUE	calothryx sp	cyanobacteria	A1732.013C11.RC11.01.15586	1117	9.29857	-82.2026	UCSD	UCSDMI	TRUE	FALSE	completed	UCSD	cyanobacteria	408172	Cyanobacteria	PAB
10125.A1732.013D1.RD1.01.15587.mzXML	0	A1732_013D1_RD1_01_15587.mzXML	TRUE	2007-11-16	marine metagenome	GAZ:Panama	A1732_013D1_RD1_01_15587.mzXML	0	PAB16NOV07.7A calothryx sp	FALSE	0	ENVO:marine biome	ENVO:sea water	ENVO:organic material	calothryx sp	A	TRUE	TRUE	calothryx sp	cyanobacteria	A1732.013D1.RD1.01.15587	1117	9.29857	-82.2026	UCSD	UCSDMI	TRUE	FALSE	completed	UCSD	cyanobacteria	408172	Cyanobacteria	PAB
10125.A1732.013D2.RD2.01.15588.mzXML	0	A1732_013D2_RD2_01_15588.mzXML	TRUE	2007-11-16	marine metagenome	GAZ:Panama	A1732_013D2_RD2_01_15588.mzXML	0	PAB16NOV07.7A calothryx sp	FALSE	0	ENVO:marine biome	ENVO:sea water	ENVO:organic material	calothryx sp	B	TRUE	TRUE	calothryx sp	cyanobacteria	A1732.013D2.RD2.01.15588	1117	9.29857	-82.2026	UCSD	UCSDMI	TRUE	FALSE	completed	UCSD	cyanobacteria	408172	Cyanobacteria	PAB
10125.A1732.013D3.RD3.01.15589.mzXML	0	A1732_013D3_RD3_01_15589.mzXML	TRUE	2007-11-16	marine metagenome	GAZ:Panama	A1732_013D3_RD3_01_15589.mzXML	0	PAB16NOV07.7A calothryx sp	FALSE	0	ENVO:marine biome	ENVO:sea water	ENVO:organic material	calothryx sp	C	TRUE	TRUE	calothryx sp	cyanobacteria	A1732.013D3.RD3.01.15589	1117	9.29857	-82.2026	UCSD	UCSDMI	TRUE	FALSE	completed	UCSD	cyanobacteria	408172	Cyanobacteria	PAB
10125.A1732.013D4.RD4.01.15590.mzXML	0	A1732_013D4_RD4_01_15590.mzXML	TRUE	2007-11-16	marine metagenome	GAZ:Panama	A1732_013D4_RD4_01_15590.mzXML	0	PAB16NOV07.7A calothryx sp	FALSE	0	ENVO:marine biome	ENVO:sea water	ENVO:organic material	calothryx sp	D	TRUE	TRUE	calothryx sp	cyanobacteria	A1732.013D4.RD4.01.15590	1117	9.29857	-82.2026	UCSD	UCSDMI	TRUE	FALSE	completed	UCSD	cyanobacteria	408172	Cyanobacteria	PAB
10125.A1732.013D5.RD5.01.15591.mzXML	0	A1732_013D5_RD5_01_15591.mzXML	TRUE	2007-11-16	marine metagenome	GAZ:Panama	A1732_013D5_RD5_01_15591.mzXML	0	PAB16NOV07.7A calothryx sp	FALSE	0	ENVO:marine biome	ENVO:sea water	ENVO:organic material	calothryx sp	E	TRUE	TRUE	calothryx sp	cyanobacteria	A1732.013D5.RD5.01.15591	1117	9.29857	-82.2026	UCSD	UCSDMI	TRUE	FALSE	completed	UCSD	cyanobacteria	408172	Cyanobacteria	PAB
10125.A1732.013D6.RD6.01.15592.mzXML	0	A1732_013D6_RD6_01_15592.mzXML	TRUE	2007-11-16	marine metagenome	GAZ:Panama	A1732_013D6_RD6_01_15592.mzXML	0	PAB16NOV07.7A calothryx sp	FALSE	0	ENVO:marine biome	ENVO:sea water	ENVO:organic material	calothryx sp	F	TRUE	TRUE	calothryx sp	cyanobacteria	A1732.013D6.RD6.01.15592	1117	9.29857	-82.2026	UCSD	UCSDMI	TRUE	FALSE	completed	UCSD	cyanobacteria	408172	Cyanobacteria	PAB
10125.A1732.013D7.RD7.01.15593.mzXML	0	A1732_013D7_RD7_01_15593.mzXML	TRUE	2007-11-16	marine metagenome	GAZ:Panama	A1732_013D7_RD7_01_15593.mzXML	0	PAB16NOV07.7A calothryx sp	FALSE	0	ENVO:marine biome	ENVO:sea water	ENVO:organic material	calothryx sp	G	TRUE	TRUE	calothryx sp	cyanobacteria	A1732.013D7.RD7.01.15593	1117	9.29857	-82.2026	UCSD	UCSDMI	TRUE	FALSE	completed	UCSD	cyanobacteria	408172	Cyanobacteria	PAB
10125.A1732.013D8.RD8.01.15594.mzXML	0	A1732_013D8_RD8_01_15594.mzXML	TRUE	2007-11-16	marine metagenome	GAZ:Panama	A1732_013D8_RD8_01_15594.mzXML	0	PAB16NOV07.7A calothryx sp	FALSE	0	ENVO:marine biome	ENVO:sea water	ENVO:organic material	calothryx sp	H	TRUE	TRUE	calothryx sp	cyanobacteria	A1732.013D8.RD8.01.15594	1117	9.29857	-82.2026	UCSD	UCSDMI	TRUE	FALSE	completed	UCSD	cyanobacteria	408172	Cyanobacteria	PAB
10125.A1732.013D9.RD9.01.15595.mzXML	0	A1732_013D9_RD9_01_15595.mzXML	TRUE	2007-11-16	marine metagenome	GAZ:Panama	A1732_013D9_RD9_01_15595.mzXML	0	PAB16NOV07.7A calothryx sp	FALSE	0	ENVO:marine biome	ENVO:sea water	ENVO:organic material	calothryx sp	I	TRUE	TRUE	calothryx sp	cyanobacteria	A1732.013D9.RD9.01.15595	1117	9.29857	-82.2026	UCSD	UCSDMI	TRUE	FALSE	completed	UCSD	cyanobacteria	408172	Cyanobacteria	PAB
10125.A1733.013D10.RD10.01.15597.mzXML	0	A1733_013D10_RD10_01_15597.mzXML	TRUE	2007-11-16	marine metagenome	GAZ:Panama	A1733_013D10_RD10_01_15597.mzXML	0	PAB16NOV07.2B Symploca probablesp	FALSE	0	ENVO:marine biome	ENVO:sea water	ENVO:organic material	Symploca probablesp	A	TRUE	TRUE	Symploca probablesp	cyanobacteria	A1733.013D10.RD10.01.15597	1117	9.29117	-82.1931	UCSD	UCSDMI	TRUE	FALSE	completed	UCSD	cyanobacteria	408172	Cyanobacteria	PAB
10125.A1733.013D11.RD11.01.15598.mzXML	0	A1733_013D11_RD11_01_15598.mzXML	TRUE	2007-11-16	marine metagenome	GAZ:Panama	A1733_013D11_RD11_01_15598.mzXML	0	PAB16NOV07.2B Symploca probablesp	FALSE	0	ENVO:marine biome	ENVO:sea water	ENVO:organic material	Symploca probablesp	B	TRUE	TRUE	Symploca probablesp	cyanobacteria	A1733.013D11.RD11.01.15598	1117	9.29117	-82.1931	UCSD	UCSDMI	TRUE	FALSE	completed	UCSD	cyanobacteria	408172	Cyanobacteria	PAB
10125.A1733.013E1.RE1.01.15599.mzXML	0	A1733_013E1_RE1_01_15599.mzXML	TRUE	2007-11-16	marine metagenome	GAZ:Panama	A1733_013E1_RE1_01_15599.mzXML	0	PAB16NOV07.2B Symploca probablesp	FALSE	0	ENVO:marine biome	ENVO:sea water	ENVO:organic material	Symploca probablesp	C	TRUE	TRUE	Symploca probablesp	cyanobacteria	A1733.013E1.RE1.01.15599	1117	9.29117	-82.1931	UCSD	UCSDMI	TRUE	FALSE	completed	UCSD	cyanobacteria	408172	Cyanobacteria	PAB
10125.A1733.013E2.RE2.01.15600.mzXML	0	A1733_013E2_RE2_01_15600.mzXML	TRUE	2007-11-16	marine metagenome	GAZ:Panama	A1733_013E2_RE2_01_15600.mzXML	0	PAB16NOV07.2B Symploca probablesp	FALSE	0	ENVO:marine biome	ENVO:sea water	ENVO:organic material	Symploca probablesp	D	TRUE	TRUE	Symploca probablesp	cyanobacteria	A1733.013E2.RE2.01.15600	1117	9.29117	-82.1931	UCSD	UCSDMI	TRUE	FALSE	completed	UCSD	cyanobacteria	408172	Cyanobacteria	PAB
10125.A1733.013E3.RE3.01.15601.mzXML	0	A1733_013E3_RE3_01_15601.mzXML	TRUE	2007-11-16	marine metagenome	GAZ:Panama	A1733_013E3_RE3_01_15601.mzXML	0	PAB16NOV07.2B Symploca probablesp	FALSE	0	ENVO:marine biome	ENVO:sea water	ENVO:organic material	Symploca probablesp	E	TRUE	TRUE	Symploca probablesp	cyanobacteria	A1733.013E3.RE3.01.15601	1117	9.29117	-82.1931	UCSD	UCSDMI	TRUE	FALSE	completed	UCSD	cyanobacteria	408172	Cyanobacteria	PAB
10125.A1733.013E4.RE4.01.15602.mzXML	0	A1733_013E4_RE4_01_15602.mzXML	TRUE	2007-11-16	marine metagenome	GAZ:Panama	A1733_013E4_RE4_01_15602.mzXML	0	PAB16NOV07.2B Symploca probablesp	FALSE	0	ENVO:marine biome	ENVO:sea water	ENVO:organic material	Symploca probablesp	I	TRUE	TRUE	Symploca probablesp	cyanobacteria	A1733.013E4.RE4.01.15602	1117	9.29117	-82.1931	UCSD	UCSDMI	TRUE	FALSE	completed	UCSD	cyanobacteria	408172	Cyanobacteria	PAB
10125.A1735.013E10.RE10.01.15609.mzXML	0	A1735_013E10_RE10_01_15609.mzXML	TRUE	2007-11-16	marine metagenome	GAZ:Panama	A1735_013E10_RE10_01_15609.mzXML	0	PAB16NOV07.1 schizothrix sp.	FALSE	0	ENVO:marine biome	ENVO:sea water	ENVO:organic material	schizothrix sp.	H	TRUE	TRUE	schizothrix sp.	cyanobacteria	A1735.013E10.RE10.01.15609	1117	9.26997	-82.1834	UCSD	UCSDMI	TRUE	FALSE	completed	UCSD	cyanobacteria	408172	Cyanobacteria	PAB
10125.A1735.013E11.RE11.01.15610.mzXML	0	A1735_013E11_RE11_01_15610.mzXML	TRUE	2007-11-16	marine metagenome	GAZ:Panama	A1735_013E11_RE11_01_15610.mzXML	0	PAB16NOV07.1 schizothrix sp.	FALSE	0	ENVO:marine biome	ENVO:sea water	ENVO:organic material	schizothrix sp.	I	TRUE	TRUE	schizothrix sp.	cyanobacteria	A1735.013E11.RE11.01.15610	1117	9.26997	-82.1834	UCSD	UCSDMI	TRUE	FALSE	completed	UCSD	cyanobacteria	408172	Cyanobacteria	PAB
10125.A1735.013E5.RE5.01.15604.mzXML	0	A1735_013E5_RE5_01_15604.mzXML	TRUE	2007-11-16	marine metagenome	GAZ:Panama	A1735_013E5_RE5_01_15604.mzXML	0	PAB16NOV07.1 schizothrix sp.	FALSE	0	ENVO:marine biome	ENVO:sea water	ENVO:organic material	schizothrix sp.	B	TRUE	TRUE	schizothrix sp.	cyanobacteria	A1735.013E5.RE5.01.15604	1117	9.26997	-82.1834	UCSD	UCSDMI	TRUE	FALSE	completed	UCSD	cyanobacteria	408172	Cyanobacteria	PAB
10125.A1735.013E6.RE6.01.15605.mzXML	0	A1735_013E6_RE6_01_15605.mzXML	TRUE	2007-11-16	marine metagenome	GAZ:Panama	A1735_013E6_RE6_01_15605.mzXML	0	PAB16NOV07.1 schizothrix sp.	FALSE	0	ENVO:marine biome	ENVO:sea water	ENVO:organic material	schizothrix sp.	C	TRUE	TRUE	schizothrix sp.	cyanobacteria	A1735.013E6.RE6.01.15605	1117	9.26997	-82.1834	UCSD	UCSDMI	TRUE	FALSE	completed	UCSD	cyanobacteria	408172	Cyanobacteria	PAB
10125.A1735.013E7.RE7.01.15606.mzXML	0	A1735_013E7_RE7_01_15606.mzXML	TRUE	2007-11-16	marine metagenome	GAZ:Panama	A1735_013E7_RE7_01_15606.mzXML	0	PAB16NOV07.1 schizothrix sp.	FALSE	0	ENVO:marine biome	ENVO:sea water	ENVO:organic material	schizothrix sp.	D	TRUE	TRUE	schizothrix sp.	cyanobacteria	A1735.013E7.RE7.01.15606	1117	9.26997	-82.1834	UCSD	UCSDMI	TRUE	FALSE	completed	UCSD	cyanobacteria	408172	Cyanobacteria	PAB
10125.A1735.013E8.RE8.01.15607.mzXML	0	A1735_013E8_RE8_01_15607.mzXML	TRUE	2007-11-16	marine metagenome	GAZ:Panama	A1735_013E8_RE8_01_15607.mzXML	0	PAB16NOV07.1 schizothrix sp.	FALSE	0	ENVO:marine biome	ENVO:sea water	ENVO:organic material	schizothrix sp.	E	TRUE	TRUE	schizothrix sp.	cyanobacteria	A1735.013E8.RE8.01.15607	1117	9.26997	-82.1834	UCSD	UCSDMI	TRUE	FALSE	completed	UCSD	cyanobacteria	408172	Cyanobacteria	PAB
10125.A1735.013E9.RE9.01.15608.mzXML	0	A1735_013E9_RE9_01_15608.mzXML	TRUE	2007-11-16	marine metagenome	GAZ:Panama	A1735_013E9_RE9_01_15608.mzXML	0	PAB16NOV07.1 schizothrix sp.	FALSE	0	ENVO:marine biome	ENVO:sea water	ENVO:organic material	schizothrix sp.	F	TRUE	TRUE	schizothrix sp.	cyanobacteria	A1735.013E9.RE9.01.15608	1117	9.26997	-82.1834	UCSD	UCSDMI	TRUE	FALSE	completed	UCSD	cyanobacteria	408172	Cyanobacteria	PAB
10125.A1736.013F1.RF1.01.15612.mzXML	0	A1736_013F1_RF1_01_15612.mzXML	TRUE	2007-11-16	marine metagenome	GAZ:Panama	A1736_013F1_RF1_01_15612.mzXML	0	PAB16NOV07.6 black lyngbya	FALSE	0	ENVO:marine biome	ENVO:sea water	ENVO:organic material	black lyngbya	Crude	TRUE	TRUE	black lyngbya	cyanobacteria	A1736.013F1.RF1.01.15612	1117	9.29013	-82.1897	UCSD	UCSDMI	TRUE	FALSE	completed	UCSD	cyanobacteria	408172	Cyanobacteria	PAB
10125.A1736.013F10.RF10.01.13812.mzXML	0	A1736_013F10_RF10_01_13812.mzXML	TRUE	2007-11-16	marine metagenome	GAZ:Panama	A1736_013F10_RF10_01_13812.mzXML	0	PAB16NOV07.6 black lyngbya	FALSE	0	ENVO:marine biome	ENVO:sea water	ENVO:organic material	black lyngbya	I	TRUE	TRUE	black lyngbya	cyanobacteria	A1736.013F10.RF10.01.13812	1117	9.29013	-82.1897	UCSD	UCSDMI	TRUE	FALSE	completed	UCSD	cyanobacteria	408172	Cyanobacteria	PAB
10125.A1736.013F2.RF2.01.15613.mzXML	0	A1736_013F2_RF2_01_15613.mzXML	TRUE	2007-11-16	marine metagenome	GAZ:Panama	A1736_013F2_RF2_01_15613.mzXML	0	PAB16NOV07.6 black lyngbya	FALSE	0	ENVO:marine biome	ENVO:sea water	ENVO:organic material	black lyngbya	A	TRUE	TRUE	black lyngbya	cyanobacteria	A1736.013F2.RF2.01.15613	1117	9.29013	-82.1897	UCSD	UCSDMI	TRUE	FALSE	completed	UCSD	cyanobacteria	408172	Cyanobacteria	PAB
10125.A1736.013F3.RF3.01.13805.mzXML	0	A1736_013F3_RF3_01_13805.mzXML	TRUE	2007-11-16	marine metagenome	GAZ:Panama	A1736_013F3_RF3_01_13805.mzXML	0	PAB16NOV07.6 black lyngbya	FALSE	0	ENVO:marine biome	ENVO:sea water	ENVO:organic material	black lyngbya	B	TRUE	TRUE	black lyngbya	cyanobacteria	A1736.013F3.RF3.01.13805	1117	9.29013	-82.1897	UCSD	UCSDMI	TRUE	FALSE	completed	UCSD	cyanobacteria	408172	Cyanobacteria	PAB
10125.A1736.013F4.RF4.01.13806.mzXML	0	A1736_013F4_RF4_01_13806.mzXML	TRUE	2007-11-16	marine metagenome	GAZ:Panama	A1736_013F4_RF4_01_13806.mzXML	0	PAB16NOV07.6 black lyngbya	FALSE	0	ENVO:marine biome	ENVO:sea water	ENVO:organic material	black lyngbya	C	TRUE	TRUE	black lyngbya	cyanobacteria	A1736.013F4.RF4.01.13806	1117	9.29013	-82.1897	UCSD	UCSDMI	TRUE	FALSE	completed	UCSD	cyanobacteria	408172	Cyanobacteria	PAB
10125.A1736.013F5.RF5.01.13807.mzXML	0	A1736_013F5_RF5_01_13807.mzXML	TRUE	2007-11-16	marine metagenome	GAZ:Panama	A1736_013F5_RF5_01_13807.mzXML	0	PAB16NOV07.6 black lyngbya	FALSE	0	ENVO:marine biome	ENVO:sea water	ENVO:organic material	black lyngbya	D	TRUE	TRUE	black lyngbya	cyanobacteria	A1736.013F5.RF5.01.13807	1117	9.29013	-82.1897	UCSD	UCSDMI	TRUE	FALSE	completed	UCSD	cyanobacteria	408172	Cyanobacteria	PAB
10125.A1736.013F6.RF6.01.13808.mzXML	0	A1736_013F6_RF6_01_13808.mzXML	TRUE	2007-11-16	marine metagenome	GAZ:Panama	A1736_013F6_RF6_01_13808.mzXML	0	PAB16NOV07.6 black lyngbya	FALSE	0	ENVO:marine biome	ENVO:sea water	ENVO:organic material	black lyngbya	E	TRUE	TRUE	black lyngbya	cyanobacteria	A1736.013F6.RF6.01.13808	1117	9.29013	-82.1897	UCSD	UCSDMI	TRUE	FALSE	completed	UCSD	cyanobacteria	408172	Cyanobacteria	PAB
10125.A1736.013F7.RF7.01.13809.mzXML	0	A1736_013F7_RF7_01_13809.mzXML	TRUE	2007-11-16	marine metagenome	GAZ:Panama	A1736_013F7_RF7_01_13809.mzXML	0	PAB16NOV07.6 black lyngbya	FALSE	0	ENVO:marine biome	ENVO:sea water	ENVO:organic material	black lyngbya	F	TRUE	TRUE	black lyngbya	cyanobacteria	A1736.013F7.RF7.01.13809	1117	9.29013	-82.1897	UCSD	UCSDMI	TRUE	FALSE	completed	UCSD	cyanobacteria	408172	Cyanobacteria	PAB
10125.A1736.013F8.RF8.01.13810.mzXML	0	A1736_013F8_RF8_01_13810.mzXML	TRUE	2007-11-16	marine metagenome	GAZ:Panama	A1736_013F8_RF8_01_13810.mzXML	0	PAB16NOV07.6 black lyngbya	FALSE	0	ENVO:marine biome	ENVO:sea water	ENVO:organic material	black lyngbya	G	TRUE	TRUE	black lyngbya	cyanobacteria	A1736.013F8.RF8.01.13810	1117	9.29013	-82.1897	UCSD	UCSDMI	TRUE	FALSE	completed	UCSD	cyanobacteria	408172	Cyanobacteria	PAB
10125.A1736.013F9.RF9.01.13811.mzXML	0	A1736_013F9_RF9_01_13811.mzXML	TRUE	2007-11-16	marine metagenome	GAZ:Panama	A1736_013F9_RF9_01_13811.mzXML	0	PAB16NOV07.6 black lyngbya	FALSE	0	ENVO:marine biome	ENVO:sea water	ENVO:organic material	black lyngbya	H	TRUE	TRUE	black lyngbya	cyanobacteria	A1736.013F9.RF9.01.13811	1117	9.29013	-82.1897	UCSD	UCSDMI	TRUE	FALSE	completed	UCSD	cyanobacteria	408172	Cyanobacteria	PAB
10125.A1737.013F11.RF11.01.13814.mzXML	0	A1737_013F11_RF11_01_13814.mzXML	TRUE	2007-11-16	marine metagenome	GAZ:Panama	A1737_013F11_RF11_01_13814.mzXML	0	PAB16NOV07.5A lyngbya semiplena	FALSE	0	ENVO:marine biome	ENVO:sea water	ENVO:organic material	lyngbya semiplena	Crude	TRUE	TRUE	lyngbya semiplena	cyanobacteria	A1737.013F11.RF11.01.13814	1117	9.29117	-82.1931	UCSD	UCSDMI	TRUE	FALSE	completed	UCSD	cyanobacteria	408172	Cyanobacteria	PAB
10125.A1737.013G1.RG1.01.13815.mzXML	0	A1737_013G1_RG1_01_13815.mzXML	TRUE	2007-11-16	marine metagenome	GAZ:Panama	A1737_013G1_RG1_01_13815.mzXML	0	PAB16NOV07.5A lyngbya semiplena	FALSE	0	ENVO:marine biome	ENVO:sea water	ENVO:organic material	lyngbya semiplena	B	TRUE	TRUE	lyngbya semiplena	cyanobacteria	A1737.013G1.RG1.01.13815	1117	9.29117	-82.1931	UCSD	UCSDMI	TRUE	FALSE	completed	UCSD	cyanobacteria	408172	Cyanobacteria	PAB
10125.A1737.013G2.RG2.01.13816.mzXML	0	A1737_013G2_RG2_01_13816.mzXML	TRUE	2007-11-16	marine metagenome	GAZ:Panama	A1737_013G2_RG2_01_13816.mzXML	0	PAB16NOV07.5A lyngbya semiplena	FALSE	0	ENVO:marine biome	ENVO:sea water	ENVO:organic material	lyngbya semiplena	C	TRUE	TRUE	lyngbya semiplena	cyanobacteria	A1737.013G2.RG2.01.13816	1117	9.29117	-82.1931	UCSD	UCSDMI	TRUE	FALSE	completed	UCSD	cyanobacteria	408172	Cyanobacteria	PAB
10125.A1737.013G3.RG3.01.13817.mzXML	0	A1737_013G3_RG3_01_13817.mzXML	TRUE	2007-11-16	marine metagenome	GAZ:Panama	A1737_013G3_RG3_01_13817.mzXML	0	PAB16NOV07.5A lyngbya semiplena	FALSE	0	ENVO:marine biome	ENVO:sea water	ENVO:organic material	lyngbya semiplena	D	TRUE	TRUE	lyngbya semiplena	cyanobacteria	A1737.013G3.RG3.01.13817	1117	9.29117	-82.1931	UCSD	UCSDMI	TRUE	FALSE	completed	UCSD	cyanobacteria	408172	Cyanobacteria	PAB
10125.A1737.013G4.RG4.01.13818.mzXML	0	A1737_013G4_RG4_01_13818.mzXML	TRUE	2007-11-16	marine metagenome	GAZ:Panama	A1737_013G4_RG4_01_13818.mzXML	0	PAB16NOV07.5A lyngbya semiplena	FALSE	0	ENVO:marine biome	ENVO:sea water	ENVO:organic material	lyngbya semiplena	E	TRUE	TRUE	lyngbya semiplena	cyanobacteria	A1737.013G4.RG4.01.13818	1117	9.29117	-82.1931	UCSD	UCSDMI	TRUE	FALSE	completed	UCSD	cyanobacteria	408172	Cyanobacteria	PAB
10125.A1737.013G5.RG5.01.13819.mzXML	0	A1737_013G5_RG5_01_13819.mzXML	TRUE	2007-11-16	marine metagenome	GAZ:Panama	A1737_013G5_RG5_01_13819.mzXML	0	PAB16NOV07.5A lyngbya semiplena	FALSE	0	ENVO:marine biome	ENVO:sea water	ENVO:organic material	lyngbya semiplena	F	TRUE	TRUE	lyngbya semiplena	cyanobacteria	A1737.013G5.RG5.01.13819	1117	9.29117	-82.1931	UCSD	UCSDMI	TRUE	FALSE	completed	UCSD	cyanobacteria	408172	Cyanobacteria	PAB
10125.A1737.013G6.RG6.01.13820.mzXML	0	A1737_013G6_RG6_01_13820.mzXML	TRUE	2007-11-16	marine metagenome	GAZ:Panama	A1737_013G6_RG6_01_13820.mzXML	0	PAB16NOV07.5A lyngbya semiplena	FALSE	0	ENVO:marine biome	ENVO:sea water	ENVO:organic material	lyngbya semiplena	H	TRUE	TRUE	lyngbya semiplena	cyanobacteria	A1737.013G6.RG6.01.13820	1117	9.29117	-82.1931	UCSD	UCSDMI	TRUE	FALSE	completed	UCSD	cyanobacteria	408172	Cyanobacteria	PAB
10125.A1737.013G7.RG7.01.13821.mzXML	0	A1737_013G7_RG7_01_13821.mzXML	TRUE	2007-11-16	marine metagenome	GAZ:Panama	A1737_013G7_RG7_01_13821.mzXML	0	PAB16NOV07.5A lyngbya semiplena	FALSE	0	ENVO:marine biome	ENVO:sea water	ENVO:organic material	lyngbya semiplena	I	TRUE	TRUE	lyngbya semiplena	cyanobacteria	A1737.013G7.RG7.01.13821	1117	9.29117	-82.1931	UCSD	UCSDMI	TRUE	FALSE	completed	UCSD	cyanobacteria	408172	Cyanobacteria	PAB
10125.A1757.013G10.RG10.01.13826.mzXML	0	A1757_013G10_RG10_01_13826.mzXML	TRUE	2007-11-17	marine metagenome	GAZ:Panama	A1757_013G10_RG10_01_13826.mzXML	0	PAB17NOV07.4A black lyngbya	FALSE	0	ENVO:marine biome	ENVO:sea water	ENVO:organic material	black lyngbya	D	TRUE	TRUE	black lyngbya	cyanobacteria	A1757.013G10.RG10.01.13826	1117	9.29117	-82.1931	UCSD	UCSDMI	TRUE	FALSE	completed	UCSD	cyanobacteria	408172	Cyanobacteria	PAB
10125.A1757.013G11.RG11.01.13827.mzXML	0	A1757_013G11_RG11_01_13827.mzXML	TRUE	2007-11-17	marine metagenome	GAZ:Panama	A1757_013G11_RG11_01_13827.mzXML	0	PAB17NOV07.4A black lyngbya	FALSE	0	ENVO:marine biome	ENVO:sea water	ENVO:organic material	black lyngbya	E	TRUE	TRUE	black lyngbya	cyanobacteria	A1757.013G11.RG11.01.13827	1117	9.29117	-82.1931	UCSD	UCSDMI	TRUE	FALSE	completed	UCSD	cyanobacteria	408172	Cyanobacteria	PAB
10125.A1757.013G8.RG8.01.13824.mzXML	0	A1757_013G8_RG8_01_13824.mzXML	TRUE	2007-11-17	marine metagenome	GAZ:Panama	A1757_013G8_RG8_01_13824.mzXML	0	PAB17NOV07.4A black lyngbya	FALSE	0	ENVO:marine biome	ENVO:sea water	ENVO:organic material	black lyngbya	B	TRUE	TRUE	black lyngbya	cyanobacteria	A1757.013G8.RG8.01.13824	1117	9.29117	-82.1931	UCSD	UCSDMI	TRUE	FALSE	completed	UCSD	cyanobacteria	408172	Cyanobacteria	PAB
10125.A1757.013G9.RG9.01.13825.mzXML	0	A1757_013G9_RG9_01_13825.mzXML	TRUE	2007-11-17	marine metagenome	GAZ:Panama	A1757_013G9_RG9_01_13825.mzXML	0	PAB17NOV07.4A black lyngbya	FALSE	0	ENVO:marine biome	ENVO:sea water	ENVO:organic material	black lyngbya	C	TRUE	TRUE	black lyngbya	cyanobacteria	A1757.013G9.RG9.01.13825	1117	9.29117	-82.1931	UCSD	UCSDMI	TRUE	FALSE	completed	UCSD	cyanobacteria	408172	Cyanobacteria	PAB
10125.A1757.013H1.RH1.01.13828.mzXML	0	A1757_013H1_RH1_01_13828.mzXML	TRUE	2007-11-17	marine metagenome	GAZ:Panama	A1757_013H1_RH1_01_13828.mzXML	0	PAB17NOV07.4A black lyngbya	FALSE	0	ENVO:marine biome	ENVO:sea water	ENVO:organic material	black lyngbya	F	TRUE	TRUE	black lyngbya	cyanobacteria	A1757.013H1.RH1.01.13828	1117	9.29117	-82.1931	UCSD	UCSDMI	TRUE	FALSE	completed	UCSD	cyanobacteria	408172	Cyanobacteria	PAB
10125.A1757.013H2.RH2.01.13829.mzXML	0	A1757_013H2_RH2_01_13829.mzXML	TRUE	2007-11-17	marine metagenome	GAZ:Panama	A1757_013H2_RH2_01_13829.mzXML	0	PAB17NOV07.4A black lyngbya	FALSE	0	ENVO:marine biome	ENVO:sea water	ENVO:organic material	black lyngbya	G	TRUE	TRUE	black lyngbya	cyanobacteria	A1757.013H2.RH2.01.13829	1117	9.29117	-82.1931	UCSD	UCSDMI	TRUE	FALSE	completed	UCSD	cyanobacteria	408172	Cyanobacteria	PAB
10125.A1757.013H3.RH3.01.13830.mzXML	0	A1757_013H3_RH3_01_13830.mzXML	TRUE	2007-11-17	marine metagenome	GAZ:Panama	A1757_013H3_RH3_01_13830.mzXML	0	PAB17NOV07.4A black lyngbya	FALSE	0	ENVO:marine biome	ENVO:sea water	ENVO:organic material	black lyngbya	H	TRUE	TRUE	black lyngbya	cyanobacteria	A1757.013H3.RH3.01.13830	1117	9.29117	-82.1931	UCSD	UCSDMI	TRUE	FALSE	completed	UCSD	cyanobacteria	408172	Cyanobacteria	PAB
10125.A1757.013H4.RH4.01.13831.mzXML	0	A1757_013H4_RH4_01_13831.mzXML	TRUE	2007-11-17	marine metagenome	GAZ:Panama	A1757_013H4_RH4_01_13831.mzXML	0	PAB17NOV07.4A black lyngbya	FALSE	0	ENVO:marine biome	ENVO:sea water	ENVO:organic material	black lyngbya	I	TRUE	TRUE	black lyngbya	cyanobacteria	A1757.013H4.RH4.01.13831	1117	9.29117	-82.1931	UCSD	UCSDMI	TRUE	FALSE	completed	UCSD	cyanobacteria	408172	Cyanobacteria	PAB
10125.A1758.014E4.GE4.01.13899.mzXML	0	A1758_014E4_GE4_01_13899.mzXML	TRUE	2007-11-16	marine metagenome	GAZ:Panama	A1758_014E4_GE4_01_13899.mzXML	0	PAB16NOV07.3 Phormidium	FALSE	0	ENVO:marine biome	ENVO:sea water	ENVO:organic material	Phormidium	A	TRUE	TRUE	Phormidium	cyanobacteria	A1758.014E4.GE4.01.13899	1117	9.26997	-82.1834	UCSD	UCSDMI	TRUE	FALSE	completed	UCSD	cyanobacteria	408172	Cyanobacteria	PAB
10125.A1758.014E5.GE5.01.13900.mzXML	0	A1758_014E5_GE5_01_13900.mzXML	TRUE	2007-11-16	marine metagenome	GAZ:Panama	A1758_014E5_GE5_01_13900.mzXML	0	PAB16NOV07.3 Phormidium	FALSE	0	ENVO:marine biome	ENVO:sea water	ENVO:organic material	Phormidium	B	TRUE	TRUE	Phormidium	cyanobacteria	A1758.014E5.GE5.01.13900	1117	9.26997	-82.1834	UCSD	UCSDMI	TRUE	FALSE	completed	UCSD	cyanobacteria	408172	Cyanobacteria	PAB
10125.A1758.014E6.GE6.01.13901.mzXML	0	A1758_014E6_GE6_01_13901.mzXML	TRUE	2007-11-16	marine metagenome	GAZ:Panama	A1758_014E6_GE6_01_13901.mzXML	0	PAB16NOV07.3 Phormidium	FALSE	0	ENVO:marine biome	ENVO:sea water	ENVO:organic material	Phormidium	C	TRUE	TRUE	Phormidium	cyanobacteria	A1758.014E6.GE6.01.13901	1117	9.26997	-82.1834	UCSD	UCSDMI	TRUE	FALSE	completed	UCSD	cyanobacteria	408172	Cyanobacteria	PAB
10125.A1758.014E7.GE7.01.13902.mzXML	0	A1758_014E7_GE7_01_13902.mzXML	TRUE	2007-11-16	marine metagenome	GAZ:Panama	A1758_014E7_GE7_01_13902.mzXML	0	PAB16NOV07.3 Phormidium	FALSE	0	ENVO:marine biome	ENVO:sea water	ENVO:organic material	Phormidium	D	TRUE	TRUE	Phormidium	cyanobacteria	A1758.014E7.GE7.01.13902	1117	9.26997	-82.1834	UCSD	UCSDMI	TRUE	FALSE	completed	UCSD	cyanobacteria	408172	Cyanobacteria	PAB
10125.A1758.014E8.GE8.01.13903.mzXML	0	A1758_014E8_GE8_01_13903.mzXML	TRUE	2007-11-16	marine metagenome	GAZ:Panama	A1758_014E8_GE8_01_13903.mzXML	0	PAB16NOV07.3 Phormidium	FALSE	0	ENVO:marine biome	ENVO:sea water	ENVO:organic material	Phormidium	E	TRUE	TRUE	Phormidium	cyanobacteria	A1758.014E8.GE8.01.13903	1117	9.26997	-82.1834	UCSD	UCSDMI	TRUE	FALSE	completed	UCSD	cyanobacteria	408172	Cyanobacteria	PAB
10125.A1759.015A1.RA1.01.13905.mzXML	0	A1759_015A1_RA1_01_13905.mzXML	TRUE	2007-11-16	marine metagenome	GAZ:Panama	A1759_015A1_RA1_01_13905.mzXML	0	PAB16NOV07.5 lyngbya semiplena	FALSE	0	ENVO:marine biome	ENVO:sea water	ENVO:organic material	lyngbya semiplena	Crude	TRUE	TRUE	lyngbya semiplena	cyanobacteria	A1759.015A1.RA1.01.13905	1117	9.26997	-82.1834	UCSD	UCSDMI	TRUE	FALSE	completed	UCSD	cyanobacteria	408172	Cyanobacteria	PAB
10125.A1759.015A10.RA10.01.13914.mzXML	0	A1759_015A10_RA10_01_13914.mzXML	TRUE	2007-11-16	marine metagenome	GAZ:Panama	A1759_015A10_RA10_01_13914.mzXML	0	PAB16NOV07.5 lyngbya semiplena	FALSE	0	ENVO:marine biome	ENVO:sea water	ENVO:organic material	lyngbya semiplena	I	TRUE	TRUE	lyngbya semiplena	cyanobacteria	A1759.015A10.RA10.01.13914	1117	9.26997	-82.1834	UCSD	UCSDMI	TRUE	FALSE	completed	UCSD	cyanobacteria	408172	Cyanobacteria	PAB
10125.A1759.015A2.RA2.01.13906.mzXML	0	A1759_015A2_RA2_01_13906.mzXML	TRUE	2007-11-16	marine metagenome	GAZ:Panama	A1759_015A2_RA2_01_13906.mzXML	0	PAB16NOV07.5 lyngbya semiplena	FALSE	0	ENVO:marine biome	ENVO:sea water	ENVO:organic material	lyngbya semiplena	A	TRUE	TRUE	lyngbya semiplena	cyanobacteria	A1759.015A2.RA2.01.13906	1117	9.26997	-82.1834	UCSD	UCSDMI	TRUE	FALSE	completed	UCSD	cyanobacteria	408172	Cyanobacteria	PAB
10125.A1759.015A3.RA3.01.13907.mzXML	0	A1759_015A3_RA3_01_13907.mzXML	TRUE	2007-11-16	marine metagenome	GAZ:Panama	A1759_015A3_RA3_01_13907.mzXML	0	PAB16NOV07.5 lyngbya semiplena	FALSE	0	ENVO:marine biome	ENVO:sea water	ENVO:organic material	lyngbya semiplena	B	TRUE	TRUE	lyngbya semiplena	cyanobacteria	A1759.015A3.RA3.01.13907	1117	9.26997	-82.1834	UCSD	UCSDMI	TRUE	FALSE	completed	UCSD	cyanobacteria	408172	Cyanobacteria	PAB
10125.A1759.015A4.RA4.01.13908.mzXML	0	A1759_015A4_RA4_01_13908.mzXML	TRUE	2007-11-16	marine metagenome	GAZ:Panama	A1759_015A4_RA4_01_13908.mzXML	0	PAB16NOV07.5 lyngbya semiplena	FALSE	0	ENVO:marine biome	ENVO:sea water	ENVO:organic material	lyngbya semiplena	C	TRUE	TRUE	lyngbya semiplena	cyanobacteria	A1759.015A4.RA4.01.13908	1117	9.26997	-82.1834	UCSD	UCSDMI	TRUE	FALSE	completed	UCSD	cyanobacteria	408172	Cyanobacteria	PAB
10125.A1759.015A5.RA5.01.13909.mzXML	0	A1759_015A5_RA5_01_13909.mzXML	TRUE	2007-11-16	marine metagenome	GAZ:Panama	A1759_015A5_RA5_01_13909.mzXML	0	PAB16NOV07.5 lyngbya semiplena	FALSE	0	ENVO:marine biome	ENVO:sea water	ENVO:organic material	lyngbya semiplena	D	TRUE	TRUE	lyngbya semiplena	cyanobacteria	A1759.015A5.RA5.01.13909	1117	9.26997	-82.1834	UCSD	UCSDMI	TRUE	FALSE	completed	UCSD	cyanobacteria	408172	Cyanobacteria	PAB
10125.A1759.015A6.RA6.01.13910.mzXML	0	A1759_015A6_RA6_01_13910.mzXML	TRUE	2007-11-16	marine metagenome	GAZ:Panama	A1759_015A6_RA6_01_13910.mzXML	0	PAB16NOV07.5 lyngbya semiplena	FALSE	0	ENVO:marine biome	ENVO:sea water	ENVO:organic material	lyngbya semiplena	E	TRUE	TRUE	lyngbya semiplena	cyanobacteria	A1759.015A6.RA6.01.13910	1117	9.26997	-82.1834	UCSD	UCSDMI	TRUE	FALSE	completed	UCSD	cyanobacteria	408172	Cyanobacteria	PAB
10125.A1759.015A7.RA7.01.13911.mzXML	0	A1759_015A7_RA7_01_13911.mzXML	TRUE	2007-11-16	marine metagenome	GAZ:Panama	A1759_015A7_RA7_01_13911.mzXML	0	PAB16NOV07.5 lyngbya semiplena	FALSE	0	ENVO:marine biome	ENVO:sea water	ENVO:organic material	lyngbya semiplena	F	TRUE	TRUE	lyngbya semiplena	cyanobacteria	A1759.015A7.RA7.01.13911	1117	9.26997	-82.1834	UCSD	UCSDMI	TRUE	FALSE	completed	UCSD	cyanobacteria	408172	Cyanobacteria	PAB
10125.A1759.015A8.RA8.01.13912.mzXML	0	A1759_015A8_RA8_01_13912.mzXML	TRUE	2007-11-16	marine metagenome	GAZ:Panama	A1759_015A8_RA8_01_13912.mzXML	0	PAB16NOV07.5 lyngbya semiplena	FALSE	0	ENVO:marine biome	ENVO:sea water	ENVO:organic material	lyngbya semiplena	G	TRUE	TRUE	lyngbya semiplena	cyanobacteria	A1759.015A8.RA8.01.13912	1117	9.26997	-82.1834	UCSD	UCSDMI	TRUE	FALSE	completed	UCSD	cyanobacteria	408172	Cyanobacteria	PAB
10125.A1759.015A9.RA9.01.13913.mzXML	0	A1759_015A9_RA9_01_13913.mzXML	TRUE	2007-11-16	marine metagenome	GAZ:Panama	A1759_015A9_RA9_01_13913.mzXML	0	PAB16NOV07.5 lyngbya semiplena	FALSE	0	ENVO:marine biome	ENVO:sea water	ENVO:organic material	lyngbya semiplena	H	TRUE	TRUE	lyngbya semiplena	cyanobacteria	A1759.015A9.RA9.01.13913	1117	9.26997	-82.1834	UCSD	UCSDMI	TRUE	FALSE	completed	UCSD	cyanobacteria	408172	Cyanobacteria	PAB
10125.A1760.015A11.RA11.01.13916.mzXML	0	A1760_015A11_RA11_01_13916.mzXML	TRUE	2007-11-16	marine metagenome	GAZ:Panama	A1760_015A11_RA11_01_13916.mzXML	0	PAB16NOV07.2A Symploca probablesp	FALSE	0	ENVO:marine biome	ENVO:sea water	ENVO:organic material	Symploca probablesp	Crude	TRUE	TRUE	Symploca probablesp	cyanobacteria	A1760.015A11.RA11.01.13916	1117	9.29013	-82.1897	UCSD	UCSDMI	TRUE	FALSE	completed	UCSD	cyanobacteria	408172	Cyanobacteria	PAB
10125.A1760.015B1.RB1.01.13917.mzXML	0	A1760_015B1_RB1_01_13917.mzXML	TRUE	2007-11-16	marine metagenome	GAZ:Panama	A1760_015B1_RB1_01_13917.mzXML	0	PAB16NOV07.2A Symploca probablesp	FALSE	0	ENVO:marine biome	ENVO:sea water	ENVO:organic material	Symploca probablesp	A	TRUE	TRUE	Symploca probablesp	cyanobacteria	A1760.015B1.RB1.01.13917	1117	9.29013	-82.1897	UCSD	UCSDMI	TRUE	FALSE	completed	UCSD	cyanobacteria	408172	Cyanobacteria	PAB
10125.A1760.015B2.RB2.01.13918.mzXML	0	A1760_015B2_RB2_01_13918.mzXML	TRUE	2007-11-16	marine metagenome	GAZ:Panama	A1760_015B2_RB2_01_13918.mzXML	0	PAB16NOV07.2A Symploca probablesp	FALSE	0	ENVO:marine biome	ENVO:sea water	ENVO:organic material	Symploca probablesp	B	TRUE	TRUE	Symploca probablesp	cyanobacteria	A1760.015B2.RB2.01.13918	1117	9.29013	-82.1897	UCSD	UCSDMI	TRUE	FALSE	completed	UCSD	cyanobacteria	408172	Cyanobacteria	PAB
10125.A1760.015B3.RB3.01.13919.mzXML	0	A1760_015B3_RB3_01_13919.mzXML	TRUE	2007-11-16	marine metagenome	GAZ:Panama	A1760_015B3_RB3_01_13919.mzXML	0	PAB16NOV07.2A Symploca probablesp	FALSE	0	ENVO:marine biome	ENVO:sea water	ENVO:organic material	Symploca probablesp	C	TRUE	TRUE	Symploca probablesp	cyanobacteria	A1760.015B3.RB3.01.13919	1117	9.29013	-82.1897	UCSD	UCSDMI	TRUE	FALSE	completed	UCSD	cyanobacteria	408172	Cyanobacteria	PAB
10125.A1760.015B4.RB4.01.13920.mzXML	0	A1760_015B4_RB4_01_13920.mzXML	TRUE	2007-11-16	marine metagenome	GAZ:Panama	A1760_015B4_RB4_01_13920.mzXML	0	PAB16NOV07.2A Symploca probablesp	FALSE	0	ENVO:marine biome	ENVO:sea water	ENVO:organic material	Symploca probablesp	D	TRUE	TRUE	Symploca probablesp	cyanobacteria	A1760.015B4.RB4.01.13920	1117	9.29013	-82.1897	UCSD	UCSDMI	TRUE	FALSE	completed	UCSD	cyanobacteria	408172	Cyanobacteria	PAB
10125.A1760.015B5.RB5.01.13921.mzXML	0	A1760_015B5_RB5_01_13921.mzXML	TRUE	2007-11-16	marine metagenome	GAZ:Panama	A1760_015B5_RB5_01_13921.mzXML	0	PAB16NOV07.2A Symploca probablesp	FALSE	0	ENVO:marine biome	ENVO:sea water	ENVO:organic material	Symploca probablesp	E	TRUE	TRUE	Symploca probablesp	cyanobacteria	A1760.015B5.RB5.01.13921	1117	9.29013	-82.1897	UCSD	UCSDMI	TRUE	FALSE	completed	UCSD	cyanobacteria	408172	Cyanobacteria	PAB
10125.A1760.015B6.RB6.01.13922.mzXML	0	A1760_015B6_RB6_01_13922.mzXML	TRUE	2007-11-16	marine metagenome	GAZ:Panama	A1760_015B6_RB6_01_13922.mzXML	0	PAB16NOV07.2A Symploca probablesp	FALSE	0	ENVO:marine biome	ENVO:sea water	ENVO:organic material	Symploca probablesp	F	TRUE	TRUE	Symploca probablesp	cyanobacteria	A1760.015B6.RB6.01.13922	1117	9.29013	-82.1897	UCSD	UCSDMI	TRUE	FALSE	completed	UCSD	cyanobacteria	408172	Cyanobacteria	PAB
10125.A1760.015B7.RB7.01.13923.mzXML	0	A1760_015B7_RB7_01_13923.mzXML	TRUE	2007-11-16	marine metagenome	GAZ:Panama	A1760_015B7_RB7_01_13923.mzXML	0	PAB16NOV07.2A Symploca probablesp	FALSE	0	ENVO:marine biome	ENVO:sea water	ENVO:organic material	Symploca probablesp	G	TRUE	TRUE	Symploca probablesp	cyanobacteria	A1760.015B7.RB7.01.13923	1117	9.29013	-82.1897	UCSD	UCSDMI	TRUE	FALSE	completed	UCSD	cyanobacteria	408172	Cyanobacteria	PAB
10125.A1760.015B8.RB8.01.13924.mzXML	0	A1760_015B8_RB8_01_13924.mzXML	TRUE	2007-11-16	marine metagenome	GAZ:Panama	A1760_015B8_RB8_01_13924.mzXML	0	PAB16NOV07.2A Symploca probablesp	FALSE	0	ENVO:marine biome	ENVO:sea water	ENVO:organic material	Symploca probablesp	H	TRUE	TRUE	Symploca probablesp	cyanobacteria	A1760.015B8.RB8.01.13924	1117	9.29013	-82.1897	UCSD	UCSDMI	TRUE	FALSE	completed	UCSD	cyanobacteria	408172	Cyanobacteria	PAB
10125.A1760.015B9.RB9.01.13925.mzXML	0	A1760_015B9_RB9_01_13925.mzXML	TRUE	2007-11-16	marine metagenome	GAZ:Panama	A1760_015B9_RB9_01_13925.mzXML	0	PAB16NOV07.2A Symploca probablesp	FALSE	0	ENVO:marine biome	ENVO:sea water	ENVO:organic material	Symploca probablesp	I	TRUE	TRUE	Symploca probablesp	cyanobacteria	A1760.015B9.RB9.01.13925	1117	9.29013	-82.1897	UCSD	UCSDMI	TRUE	FALSE	completed	UCSD	cyanobacteria	408172	Cyanobacteria	PAB
10125.A1761.015B10.RB10.01.13933.mzXML	0	A1761_015B10_RB10_01_13933.mzXML	TRUE	2007-11-16	marine metagenome	GAZ:Panama	A1761_015B10_RB10_01_13933.mzXML	0	PAB16NOV07.7 calothryx sp	FALSE	0	ENVO:marine biome	ENVO:sea water	ENVO:organic material	calothryx sp	Crude	TRUE	TRUE	calothryx sp	cyanobacteria	A1761.015B10.RB10.01.13933	1117	9.29013	-82.1897	UCSD	UCSDMI	TRUE	FALSE	completed	UCSD	cyanobacteria	408172	Cyanobacteria	PAB
10125.A1761.015C1.RC1.01.13934.mzXML	0	A1761_015C1_RC1_01_13934.mzXML	TRUE	2007-11-16	marine metagenome	GAZ:Panama	A1761_015C1_RC1_01_13934.mzXML	0	PAB16NOV07.7 calothryx sp	FALSE	0	ENVO:marine biome	ENVO:sea water	ENVO:organic material	calothryx sp	B	TRUE	TRUE	calothryx sp	cyanobacteria	A1761.015C1.RC1.01.13934	1117	9.29013	-82.1897	UCSD	UCSDMI	TRUE	FALSE	completed	UCSD	cyanobacteria	408172	Cyanobacteria	PAB
10125.A1761.015C2.RC2.01.13935.mzXML	0	A1761_015C2_RC2_01_13935.mzXML	TRUE	2007-11-16	marine metagenome	GAZ:Panama	A1761_015C2_RC2_01_13935.mzXML	0	PAB16NOV07.7 calothryx sp	FALSE	0	ENVO:marine biome	ENVO:sea water	ENVO:organic material	calothryx sp	H	TRUE	TRUE	calothryx sp	cyanobacteria	A1761.015C2.RC2.01.13935	1117	9.29013	-82.1897	UCSD	UCSDMI	TRUE	FALSE	completed	UCSD	cyanobacteria	408172	Cyanobacteria	PAB
10125.A1761.015C3.RC3.01.13936.mzXML	0	A1761_015C3_RC3_01_13936.mzXML	TRUE	2007-11-16	marine metagenome	GAZ:Panama	A1761_015C3_RC3_01_13936.mzXML	0	PAB16NOV07.7 calothryx sp	FALSE	0	ENVO:marine biome	ENVO:sea water	ENVO:organic material	calothryx sp	I	TRUE	TRUE	calothryx sp	cyanobacteria	A1761.015C3.RC3.01.13936	1117	9.29013	-82.1897	UCSD	UCSDMI	TRUE	FALSE	completed	UCSD	cyanobacteria	408172	Cyanobacteria	PAB
10125.A1762.015C10.RC10.01.13944.mzXML	0	A1762_015C10_RC10_01_13944.mzXML	TRUE	2005-04-08	marine metagenome	GAZ:Panama	A1762_015C10_RC10_01_13944.mzXML	0	PAB08APR05.3 schizothrix sp.	FALSE	0	ENVO:marine biome	ENVO:sea water	ENVO:organic material	schizothrix sp.	F	TRUE	TRUE	schizothrix sp.	cyanobacteria	A1762.015C10.RC10.01.13944	1117	32.8427	-117.258	UCSD	UCSDMI	TRUE	FALSE	completed	UCSD	cyanobacteria	408172	Cyanobacteria	PAB
10125.A1762.015C11.RC11.01.13945.mzXML	0	A1762_015C11_RC11_01_13945.mzXML	TRUE	2005-04-08	marine metagenome	GAZ:Panama	A1762_015C11_RC11_01_13945.mzXML	0	PAB08APR05.3 schizothrix sp.	FALSE	0	ENVO:marine biome	ENVO:sea water	ENVO:organic material	schizothrix sp.	G	TRUE	TRUE	schizothrix sp.	cyanobacteria	A1762.015C11.RC11.01.13945	1117	32.8427	-117.258	UCSD	UCSDMI	TRUE	FALSE	completed	UCSD	cyanobacteria	408172	Cyanobacteria	PAB
10125.A1762.015C4.RC4.01.13938.mzXML	0	A1762_015C4_RC4_01_13938.mzXML	TRUE	2005-04-08	marine metagenome	GAZ:Panama	A1762_015C4_RC4_01_13938.mzXML	0	PAB08APR05.3 schizothrix sp.	FALSE	0	ENVO:marine biome	ENVO:sea water	ENVO:organic material	schizothrix sp.	Crude	TRUE	TRUE	schizothrix sp.	cyanobacteria	A1762.015C4.RC4.01.13938	1117	32.8427	-117.258	UCSD	UCSDMI	TRUE	FALSE	completed	UCSD	cyanobacteria	408172	Cyanobacteria	PAB
10125.A1762.015C5.RC5.01.13939.mzXML	0	A1762_015C5_RC5_01_13939.mzXML	TRUE	2005-04-08	marine metagenome	GAZ:Panama	A1762_015C5_RC5_01_13939.mzXML	0	PAB08APR05.3 schizothrix sp.	FALSE	0	ENVO:marine biome	ENVO:sea water	ENVO:organic material	schizothrix sp.	A	TRUE	TRUE	schizothrix sp.	cyanobacteria	A1762.015C5.RC5.01.13939	1117	32.8427	-117.258	UCSD	UCSDMI	TRUE	FALSE	completed	UCSD	cyanobacteria	408172	Cyanobacteria	PAB
10125.A1762.015C6.RC6.01.13940.mzXML	0	A1762_015C6_RC6_01_13940.mzXML	TRUE	2005-04-08	marine metagenome	GAZ:Panama	A1762_015C6_RC6_01_13940.mzXML	0	PAB08APR05.3 schizothrix sp.	FALSE	0	ENVO:marine biome	ENVO:sea water	ENVO:organic material	schizothrix sp.	B	TRUE	TRUE	schizothrix sp.	cyanobacteria	A1762.015C6.RC6.01.13940	1117	32.8427	-117.258	UCSD	UCSDMI	TRUE	FALSE	completed	UCSD	cyanobacteria	408172	Cyanobacteria	PAB
10125.A1762.015C7.RC7.01.13941.mzXML	0	A1762_015C7_RC7_01_13941.mzXML	TRUE	2005-04-08	marine metagenome	GAZ:Panama	A1762_015C7_RC7_01_13941.mzXML	0	PAB08APR05.3 schizothrix sp.	FALSE	0	ENVO:marine biome	ENVO:sea water	ENVO:organic material	schizothrix sp.	C	TRUE	TRUE	schizothrix sp.	cyanobacteria	A1762.015C7.RC7.01.13941	1117	32.8427	-117.258	UCSD	UCSDMI	TRUE	FALSE	completed	UCSD	cyanobacteria	408172	Cyanobacteria	PAB
10125.A1762.015C8.RC8.01.13942.mzXML	0	A1762_015C8_RC8_01_13942.mzXML	TRUE	2005-04-08	marine metagenome	GAZ:Panama	A1762_015C8_RC8_01_13942.mzXML	0	PAB08APR05.3 schizothrix sp.	FALSE	0	ENVO:marine biome	ENVO:sea water	ENVO:organic material	schizothrix sp.	D	TRUE	TRUE	schizothrix sp.	cyanobacteria	A1762.015C8.RC8.01.13942	1117	32.8427	-117.258	UCSD	UCSDMI	TRUE	FALSE	completed	UCSD	cyanobacteria	408172	Cyanobacteria	PAB
10125.A1762.015C9.RC9.01.13943.mzXML	0	A1762_015C9_RC9_01_13943.mzXML	TRUE	2005-04-08	marine metagenome	GAZ:Panama	A1762_015C9_RC9_01_13943.mzXML	0	PAB08APR05.3 schizothrix sp.	FALSE	0	ENVO:marine biome	ENVO:sea water	ENVO:organic material	schizothrix sp.	E	TRUE	TRUE	schizothrix sp.	cyanobacteria	A1762.015C9.RC9.01.13943	1117	32.8427	-117.258	UCSD	UCSDMI	TRUE	FALSE	completed	UCSD	cyanobacteria	408172	Cyanobacteria	PAB
10125.A1762.015D1.RD1.01.13946.mzXML	0	A1762_015D1_RD1_01_13946.mzXML	TRUE	2005-04-08	marine metagenome	GAZ:Panama	A1762_015D1_RD1_01_13946.mzXML	0	PAB08APR05.3 schizothrix sp.	FALSE	0	ENVO:marine biome	ENVO:sea water	ENVO:organic material	schizothrix sp.	H	TRUE	TRUE	schizothrix sp.	cyanobacteria	A1762.015D1.RD1.01.13946	1117	32.8427	-117.258	UCSD	UCSDMI	TRUE	FALSE	completed	UCSD	cyanobacteria	408172	Cyanobacteria	PAB
10125.A1762.015D2.RD2.01.13947.mzXML	0	A1762_015D2_RD2_01_13947.mzXML	TRUE	2005-04-08	marine metagenome	GAZ:Panama	A1762_015D2_RD2_01_13947.mzXML	0	PAB08APR05.3 schizothrix sp.	FALSE	0	ENVO:marine biome	ENVO:sea water	ENVO:organic material	schizothrix sp.	I	TRUE	TRUE	schizothrix sp.	cyanobacteria	A1762.015D2.RD2.01.13947	1117	32.8427	-117.258	UCSD	UCSDMI	TRUE	FALSE	completed	UCSD	cyanobacteria	408172	Cyanobacteria	PAB
10125.A1763.015D10.RD10.01.13956.mzXML	0	A1763_015D10_RD10_01_13956.mzXML	TRUE	2006-04-04	marine metagenome	GAZ:Panama	A1763_015D10_RD10_01_13956.mzXML	0	PAB04APR06.8 red lyngbya	FALSE	0	ENVO:marine biome	ENVO:sea water	ENVO:organic material	red lyngbya	G	TRUE	TRUE	red lyngbya	cyanobacteria	A1763.015D10.RD10.01.13956	1117	9.28913	-82.1714	UCSD	UCSDMI	TRUE	FALSE	completed	UCSD	cyanobacteria	408172	Cyanobacteria	PAB
10125.A1763.015D11.RD11.01.13957.mzXML	0	A1763_015D11_RD11_01_13957.mzXML	TRUE	2006-04-04	marine metagenome	GAZ:Panama	A1763_015D11_RD11_01_13957.mzXML	0	PAB04APR06.8 red lyngbya	FALSE	0	ENVO:marine biome	ENVO:sea water	ENVO:organic material	red lyngbya	H	TRUE	TRUE	red lyngbya	cyanobacteria	A1763.015D11.RD11.01.13957	1117	9.28913	-82.1714	UCSD	UCSDMI	TRUE	FALSE	completed	UCSD	cyanobacteria	408172	Cyanobacteria	PAB
10125.A1763.015D3.RD3.01.13949.mzXML	0	A1763_015D3_RD3_01_13949.mzXML	TRUE	2006-04-04	marine metagenome	GAZ:Panama	A1763_015D3_RD3_01_13949.mzXML	0	PAB04APR06.8 red lyngbya	FALSE	0	ENVO:marine biome	ENVO:sea water	ENVO:organic material	red lyngbya	Crude	TRUE	TRUE	red lyngbya	cyanobacteria	A1763.015D3.RD3.01.13949	1117	9.28913	-82.1714	UCSD	UCSDMI	TRUE	FALSE	completed	UCSD	cyanobacteria	408172	Cyanobacteria	PAB
10125.A1763.015D4.RD4.01.13950.mzXML	0	A1763_015D4_RD4_01_13950.mzXML	TRUE	2006-04-04	marine metagenome	GAZ:Panama	A1763_015D4_RD4_01_13950.mzXML	0	PAB04APR06.8 red lyngbya	FALSE	0	ENVO:marine biome	ENVO:sea water	ENVO:organic material	red lyngbya	A	TRUE	TRUE	red lyngbya	cyanobacteria	A1763.015D4.RD4.01.13950	1117	9.28913	-82.1714	UCSD	UCSDMI	TRUE	FALSE	completed	UCSD	cyanobacteria	408172	Cyanobacteria	PAB
10125.A1763.015D5.RD5.01.13951.mzXML	0	A1763_015D5_RD5_01_13951.mzXML	TRUE	2006-04-04	marine metagenome	GAZ:Panama	A1763_015D5_RD5_01_13951.mzXML	0	PAB04APR06.8 red lyngbya	FALSE	0	ENVO:marine biome	ENVO:sea water	ENVO:organic material	red lyngbya	B	TRUE	TRUE	red lyngbya	cyanobacteria	A1763.015D5.RD5.01.13951	1117	9.28913	-82.1714	UCSD	UCSDMI	TRUE	FALSE	completed	UCSD	cyanobacteria	408172	Cyanobacteria	PAB
10125.A1763.015D6.RD6.01.13952.mzXML	0	A1763_015D6_RD6_01_13952.mzXML	TRUE	2006-04-04	marine metagenome	GAZ:Panama	A1763_015D6_RD6_01_13952.mzXML	0	PAB04APR06.8 red lyngbya	FALSE	0	ENVO:marine biome	ENVO:sea water	ENVO:organic material	red lyngbya	C	TRUE	TRUE	red lyngbya	cyanobacteria	A1763.015D6.RD6.01.13952	1117	9.28913	-82.1714	UCSD	UCSDMI	TRUE	FALSE	completed	UCSD	cyanobacteria	408172	Cyanobacteria	PAB
10125.A1763.015D7.RD7.01.13953.mzXML	0	A1763_015D7_RD7_01_13953.mzXML	TRUE	2006-04-04	marine metagenome	GAZ:Panama	A1763_015D7_RD7_01_13953.mzXML	0	PAB04APR06.8 red lyngbya	FALSE	0	ENVO:marine biome	ENVO:sea water	ENVO:organic material	red lyngbya	D	TRUE	TRUE	red lyngbya	cyanobacteria	A1763.015D7.RD7.01.13953	1117	9.28913	-82.1714	UCSD	UCSDMI	TRUE	FALSE	completed	UCSD	cyanobacteria	408172	Cyanobacteria	PAB
10125.A1763.015D8.RD8.01.13954.mzXML	0	A1763_015D8_RD8_01_13954.mzXML	TRUE	2006-04-04	marine metagenome	GAZ:Panama	A1763_015D8_RD8_01_13954.mzXML	0	PAB04APR06.8 red lyngbya	FALSE	0	ENVO:marine biome	ENVO:sea water	ENVO:organic material	red lyngbya	E	TRUE	TRUE	red lyngbya	cyanobacteria	A1763.015D8.RD8.01.13954	1117	9.28913	-82.1714	UCSD	UCSDMI	TRUE	FALSE	completed	UCSD	cyanobacteria	408172	Cyanobacteria	PAB
10125.A1763.015D9.RD9.01.13955.mzXML	0	A1763_015D9_RD9_01_13955.mzXML	TRUE	2006-04-04	marine metagenome	GAZ:Panama	A1763_015D9_RD9_01_13955.mzXML	0	PAB04APR06.8 red lyngbya	FALSE	0	ENVO:marine biome	ENVO:sea water	ENVO:organic material	red lyngbya	F	TRUE	TRUE	red lyngbya	cyanobacteria	A1763.015D9.RD9.01.13955	1117	9.28913	-82.1714	UCSD	UCSDMI	TRUE	FALSE	completed	UCSD	cyanobacteria	408172	Cyanobacteria	PAB
10125.A1763.015E1.RE1.01.13958.mzXML	0	A1763_015E1_RE1_01_13958.mzXML	TRUE	2006-04-04	marine metagenome	GAZ:Panama	A1763_015E1_RE1_01_13958.mzXML	0	PAB04APR06.8 red lyngbya	FALSE	0	ENVO:marine biome	ENVO:sea water	ENVO:organic material	red lyngbya	I	TRUE	TRUE	red lyngbya	cyanobacteria	A1763.015E1.RE1.01.13958	1117	9.28913	-82.1714	UCSD	UCSDMI	TRUE	FALSE	completed	UCSD	cyanobacteria	408172	Cyanobacteria	PAB
10125.A1765.015E11.RE11.01.13970.mzXML	0	A1765_015E11_RE11_01_13970.mzXML	TRUE	2006-04-05	marine metagenome	GAZ:Panama	A1765_015E11_RE11_01_13970.mzXML	0	PAB05APR06.4 black lyngbya	FALSE	0	ENVO:marine biome	ENVO:sea water	ENVO:organic material	black lyngbya	Crude	TRUE	TRUE	black lyngbya	cyanobacteria	A1765.015E11.RE11.01.13970	1117	9.28493	-82.1913	UCSD	UCSDMI	TRUE	FALSE	completed	UCSD	cyanobacteria	408172	Cyanobacteria	PAB
10125.A1765.015F1.RF1.01.13971.mzXML	0	A1765_015F1_RF1_01_13971.mzXML	TRUE	2006-04-05	marine metagenome	GAZ:Panama	A1765_015F1_RF1_01_13971.mzXML	0	PAB05APR06.4 black lyngbya	FALSE	0	ENVO:marine biome	ENVO:sea water	ENVO:organic material	black lyngbya	A	TRUE	TRUE	black lyngbya	cyanobacteria	A1765.015F1.RF1.01.13971	1117	9.28493	-82.1913	UCSD	UCSDMI	TRUE	FALSE	completed	UCSD	cyanobacteria	408172	Cyanobacteria	PAB
10125.A1765.015F2.RF2.01.13972.mzXML	0	A1765_015F2_RF2_01_13972.mzXML	TRUE	2006-04-05	marine metagenome	GAZ:Panama	A1765_015F2_RF2_01_13972.mzXML	0	PAB05APR06.4 black lyngbya	FALSE	0	ENVO:marine biome	ENVO:sea water	ENVO:organic material	black lyngbya	B	TRUE	TRUE	black lyngbya	cyanobacteria	A1765.015F2.RF2.01.13972	1117	9.28493	-82.1913	UCSD	UCSDMI	TRUE	FALSE	completed	UCSD	cyanobacteria	408172	Cyanobacteria	PAB
10125.A1765.015F3.RF3.01.13973.mzXML	0	A1765_015F3_RF3_01_13973.mzXML	TRUE	2006-04-05	marine metagenome	GAZ:Panama	A1765_015F3_RF3_01_13973.mzXML	0	PAB05APR06.4 black lyngbya	FALSE	0	ENVO:marine biome	ENVO:sea water	ENVO:organic material	black lyngbya	C	TRUE	TRUE	black lyngbya	cyanobacteria	A1765.015F3.RF3.01.13973	1117	9.28493	-82.1913	UCSD	UCSDMI	TRUE	FALSE	completed	UCSD	cyanobacteria	408172	Cyanobacteria	PAB
10125.A1765.015F4.RF4.01.13974.mzXML	0	A1765_015F4_RF4_01_13974.mzXML	TRUE	2006-04-05	marine metagenome	GAZ:Panama	A1765_015F4_RF4_01_13974.mzXML	0	PAB05APR06.4 black lyngbya	FALSE	0	ENVO:marine biome	ENVO:sea water	ENVO:organic material	black lyngbya	D	TRUE	TRUE	black lyngbya	cyanobacteria	A1765.015F4.RF4.01.13974	1117	9.28493	-82.1913	UCSD	UCSDMI	TRUE	FALSE	completed	UCSD	cyanobacteria	408172	Cyanobacteria	PAB
10125.A1765.015F5.RF5.01.13975.mzXML	0	A1765_015F5_RF5_01_13975.mzXML	TRUE	2006-04-05	marine metagenome	GAZ:Panama	A1765_015F5_RF5_01_13975.mzXML	0	PAB05APR06.4 black lyngbya	FALSE	0	ENVO:marine biome	ENVO:sea water	ENVO:organic material	black lyngbya	E	TRUE	TRUE	black lyngbya	cyanobacteria	A1765.015F5.RF5.01.13975	1117	9.28493	-82.1913	UCSD	UCSDMI	TRUE	FALSE	completed	UCSD	cyanobacteria	408172	Cyanobacteria	PAB
10125.A1765.015F6.RF6.01.13976.mzXML	0	A1765_015F6_RF6_01_13976.mzXML	TRUE	2006-04-05	marine metagenome	GAZ:Panama	A1765_015F6_RF6_01_13976.mzXML	0	PAB05APR06.4 black lyngbya	FALSE	0	ENVO:marine biome	ENVO:sea water	ENVO:organic material	black lyngbya	F	TRUE	TRUE	black lyngbya	cyanobacteria	A1765.015F6.RF6.01.13976	1117	9.28493	-82.1913	UCSD	UCSDMI	TRUE	FALSE	completed	UCSD	cyanobacteria	408172	Cyanobacteria	PAB
10125.A1765.015F7.RF7.01.13977.mzXML	0	A1765_015F7_RF7_01_13977.mzXML	TRUE	2006-04-05	marine metagenome	GAZ:Panama	A1765_015F7_RF7_01_13977.mzXML	0	PAB05APR06.4 black lyngbya	FALSE	0	ENVO:marine biome	ENVO:sea water	ENVO:organic material	black lyngbya	G	TRUE	TRUE	black lyngbya	cyanobacteria	A1765.015F7.RF7.01.13977	1117	9.28493	-82.1913	UCSD	UCSDMI	TRUE	FALSE	completed	UCSD	cyanobacteria	408172	Cyanobacteria	PAB
10125.A1765.015F8.RF8.01.13978.mzXML	0	A1765_015F8_RF8_01_13978.mzXML	TRUE	2006-04-05	marine metagenome	GAZ:Panama	A1765_015F8_RF8_01_13978.mzXML	0	PAB05APR06.4 black lyngbya	FALSE	0	ENVO:marine biome	ENVO:sea water	ENVO:organic material	black lyngbya	H	TRUE	TRUE	black lyngbya	cyanobacteria	A1765.015F8.RF8.01.13978	1117	9.28493	-82.1913	UCSD	UCSDMI	TRUE	FALSE	completed	UCSD	cyanobacteria	408172	Cyanobacteria	PAB
10125.A1765.015F9.RF9.01.13979.mzXML	0	A1765_015F9_RF9_01_13979.mzXML	TRUE	2006-04-05	marine metagenome	GAZ:Panama	A1765_015F9_RF9_01_13979.mzXML	0	PAB05APR06.4 black lyngbya	FALSE	0	ENVO:marine biome	ENVO:sea water	ENVO:organic material	black lyngbya	I	TRUE	TRUE	black lyngbya	cyanobacteria	A1765.015F9.RF9.01.13979	1117	9.28493	-82.1913	UCSD	UCSDMI	TRUE	FALSE	completed	UCSD	cyanobacteria	408172	Cyanobacteria	PAB
10125.A1766.015F10.RF10.01.13981.mzXML	0	A1766_015F10_RF10_01_13981.mzXML	TRUE	2006-10-26	marine metagenome	GAZ:Panama	A1766_015F10_RF10_01_13981.mzXML	0	PAB26OCT06.1 schizothrix sp.	FALSE	0	ENVO:marine biome	ENVO:sea water	ENVO:organic material	schizothrix sp.	Crude	TRUE	TRUE	schizothrix sp.	cyanobacteria	A1766.015F10.RF10.01.13981	1117	9.5994	-79.6978	UCSD	UCSDMI	TRUE	FALSE	completed	UCSD	cyanobacteria	408172	Cyanobacteria	PAB
10125.A1766.015F11.RF11.01.13982.mzXML	0	A1766_015F11_RF11_01_13982.mzXML	TRUE	2006-10-26	marine metagenome	GAZ:Panama	A1766_015F11_RF11_01_13982.mzXML	0	PAB26OCT06.1 schizothrix sp.	FALSE	0	ENVO:marine biome	ENVO:sea water	ENVO:organic material	schizothrix sp.	A	TRUE	TRUE	schizothrix sp.	cyanobacteria	A1766.015F11.RF11.01.13982	1117	9.5994	-79.6978	UCSD	UCSDMI	TRUE	FALSE	completed	UCSD	cyanobacteria	408172	Cyanobacteria	PAB
10125.A1766.015G1.RG1.01.13983.mzXML	0	A1766_015G1_RG1_01_13983.mzXML	TRUE	2006-10-26	marine metagenome	GAZ:Panama	A1766_015G1_RG1_01_13983.mzXML	0	PAB26OCT06.1 schizothrix sp.	FALSE	0	ENVO:marine biome	ENVO:sea water	ENVO:organic material	schizothrix sp.	B	TRUE	TRUE	schizothrix sp.	cyanobacteria	A1766.015G1.RG1.01.13983	1117	9.5994	-79.6978	UCSD	UCSDMI	TRUE	FALSE	completed	UCSD	cyanobacteria	408172	Cyanobacteria	PAB
10125.A1766.015G2.RG2.01.13984.mzXML	0	A1766_015G2_RG2_01_13984.mzXML	TRUE	2006-10-26	marine metagenome	GAZ:Panama	A1766_015G2_RG2_01_13984.mzXML	0	PAB26OCT06.1 schizothrix sp.	FALSE	0	ENVO:marine biome	ENVO:sea water	ENVO:organic material	schizothrix sp.	C	TRUE	TRUE	schizothrix sp.	cyanobacteria	A1766.015G2.RG2.01.13984	1117	9.5994	-79.6978	UCSD	UCSDMI	TRUE	FALSE	completed	UCSD	cyanobacteria	408172	Cyanobacteria	PAB
10125.A1766.015G3.RG3.01.13985.mzXML	0	A1766_015G3_RG3_01_13985.mzXML	TRUE	2006-10-26	marine metagenome	GAZ:Panama	A1766_015G3_RG3_01_13985.mzXML	0	PAB26OCT06.1 schizothrix sp.	FALSE	0	ENVO:marine biome	ENVO:sea water	ENVO:organic material	schizothrix sp.	D	TRUE	TRUE	schizothrix sp.	cyanobacteria	A1766.015G3.RG3.01.13985	1117	9.5994	-79.6978	UCSD	UCSDMI	TRUE	FALSE	completed	UCSD	cyanobacteria	408172	Cyanobacteria	PAB
10125.A1766.015G4.RG4.01.13986.mzXML	0	A1766_015G4_RG4_01_13986.mzXML	TRUE	2006-10-26	marine metagenome	GAZ:Panama	A1766_015G4_RG4_01_13986.mzXML	0	PAB26OCT06.1 schizothrix sp.	FALSE	0	ENVO:marine biome	ENVO:sea water	ENVO:organic material	schizothrix sp.	E	TRUE	TRUE	schizothrix sp.	cyanobacteria	A1766.015G4.RG4.01.13986	1117	9.5994	-79.6978	UCSD	UCSDMI	TRUE	FALSE	completed	UCSD	cyanobacteria	408172	Cyanobacteria	PAB
10125.A1766.015G5.RG5.01.13987.mzXML	0	A1766_015G5_RG5_01_13987.mzXML	TRUE	2006-10-26	marine metagenome	GAZ:Panama	A1766_015G5_RG5_01_13987.mzXML	0	PAB26OCT06.1 schizothrix sp.	FALSE	0	ENVO:marine biome	ENVO:sea water	ENVO:organic material	schizothrix sp.	F	TRUE	TRUE	schizothrix sp.	cyanobacteria	A1766.015G5.RG5.01.13987	1117	9.5994	-79.6978	UCSD	UCSDMI	TRUE	FALSE	completed	UCSD	cyanobacteria	408172	Cyanobacteria	PAB
10125.A1766.015G6.RG6.01.13988.mzXML	0	A1766_015G6_RG6_01_13988.mzXML	TRUE	2006-10-26	marine metagenome	GAZ:Panama	A1766_015G6_RG6_01_13988.mzXML	0	PAB26OCT06.1 schizothrix sp.	FALSE	0	ENVO:marine biome	ENVO:sea water	ENVO:organic material	schizothrix sp.	G	TRUE	TRUE	schizothrix sp.	cyanobacteria	A1766.015G6.RG6.01.13988	1117	9.5994	-79.6978	UCSD	UCSDMI	TRUE	FALSE	completed	UCSD	cyanobacteria	408172	Cyanobacteria	PAB
10125.A1766.015G7.RG7.01.13989.mzXML	0	A1766_015G7_RG7_01_13989.mzXML	TRUE	2006-10-26	marine metagenome	GAZ:Panama	A1766_015G7_RG7_01_13989.mzXML	0	PAB26OCT06.1 schizothrix sp.	FALSE	0	ENVO:marine biome	ENVO:sea water	ENVO:organic material	schizothrix sp.	H	TRUE	TRUE	schizothrix sp.	cyanobacteria	A1766.015G7.RG7.01.13989	1117	9.5994	-79.6978	UCSD	UCSDMI	TRUE	FALSE	completed	UCSD	cyanobacteria	408172	Cyanobacteria	PAB
10125.A1766.015G8.RG8.01.13990.mzXML	0	A1766_015G8_RG8_01_13990.mzXML	TRUE	2006-10-26	marine metagenome	GAZ:Panama	A1766_015G8_RG8_01_13990.mzXML	0	PAB26OCT06.1 schizothrix sp.	FALSE	0	ENVO:marine biome	ENVO:sea water	ENVO:organic material	schizothrix sp.	I	TRUE	TRUE	schizothrix sp.	cyanobacteria	A1766.015G8.RG8.01.13990	1117	9.5994	-79.6978	UCSD	UCSDMI	TRUE	FALSE	completed	UCSD	cyanobacteria	408172	Cyanobacteria	PAB
10125.A1767.015G10.RG10.01.13993.mzXML	0	A1767_015G10_RG10_01_13993.mzXML	TRUE	2006-04-04	marine metagenome	GAZ:Panama	A1767_015G10_RG10_01_13993.mzXML	0	PAB04APR06.1 red lyngbya	FALSE	0	ENVO:marine biome	ENVO:sea water	ENVO:organic material	red lyngbya	A	TRUE	TRUE	red lyngbya	cyanobacteria	A1767.015G10.RG10.01.13993	1117	9.28132	-82.1026	UCSD	UCSDMI	TRUE	FALSE	completed	UCSD	cyanobacteria	408172	Cyanobacteria	PAB
10125.A1767.015G11.RG11.01.13994.mzXML	0	A1767_015G11_RG11_01_13994.mzXML	TRUE	2006-04-04	marine metagenome	GAZ:Panama	A1767_015G11_RG11_01_13994.mzXML	0	PAB04APR06.1 red lyngbya	FALSE	0	ENVO:marine biome	ENVO:sea water	ENVO:organic material	red lyngbya	B	TRUE	TRUE	red lyngbya	cyanobacteria	A1767.015G11.RG11.01.13994	1117	9.28132	-82.1026	UCSD	UCSDMI	TRUE	FALSE	completed	UCSD	cyanobacteria	408172	Cyanobacteria	PAB
10125.A1767.015G9.RG9.01.13992.mzXML	0	A1767_015G9_RG9_01_13992.mzXML	TRUE	2006-04-04	marine metagenome	GAZ:Panama	A1767_015G9_RG9_01_13992.mzXML	0	PAB04APR06.1 red lyngbya	FALSE	0	ENVO:marine biome	ENVO:sea water	ENVO:organic material	red lyngbya	Crude	TRUE	TRUE	red lyngbya	cyanobacteria	A1767.015G9.RG9.01.13992	1117	9.28132	-82.1026	UCSD	UCSDMI	TRUE	FALSE	completed	UCSD	cyanobacteria	408172	Cyanobacteria	PAB
10125.A1767.015H1.RH1.01.13995.mzXML	0	A1767_015H1_RH1_01_13995.mzXML	TRUE	2006-04-04	marine metagenome	GAZ:Panama	A1767_015H1_RH1_01_13995.mzXML	0	PAB04APR06.1 red lyngbya	FALSE	0	ENVO:marine biome	ENVO:sea water	ENVO:organic material	red lyngbya	C	TRUE	TRUE	red lyngbya	cyanobacteria	A1767.015H1.RH1.01.13995	1117	9.28132	-82.1026	UCSD	UCSDMI	TRUE	FALSE	completed	UCSD	cyanobacteria	408172	Cyanobacteria	PAB
10125.A1767.015H2.RH2.01.13996.mzXML	0	A1767_015H2_RH2_01_13996.mzXML	TRUE	2006-04-04	marine metagenome	GAZ:Panama	A1767_015H2_RH2_01_13996.mzXML	0	PAB04APR06.1 red lyngbya	FALSE	0	ENVO:marine biome	ENVO:sea water	ENVO:organic material	red lyngbya	D	TRUE	TRUE	red lyngbya	cyanobacteria	A1767.015H2.RH2.01.13996	1117	9.28132	-82.1026	UCSD	UCSDMI	TRUE	FALSE	completed	UCSD	cyanobacteria	408172	Cyanobacteria	PAB
10125.A1767.015H3.RH3.01.13997.mzXML	0	A1767_015H3_RH3_01_13997.mzXML	TRUE	2006-04-04	marine metagenome	GAZ:Panama	A1767_015H3_RH3_01_13997.mzXML	0	PAB04APR06.1 red lyngbya	FALSE	0	ENVO:marine biome	ENVO:sea water	ENVO:organic material	red lyngbya	E	TRUE	TRUE	red lyngbya	cyanobacteria	A1767.015H3.RH3.01.13997	1117	9.28132	-82.1026	UCSD	UCSDMI	TRUE	FALSE	completed	UCSD	cyanobacteria	408172	Cyanobacteria	PAB
10125.A1767.015H4.RH4.01.13998.mzXML	0	A1767_015H4_RH4_01_13998.mzXML	TRUE	2006-04-04	marine metagenome	GAZ:Panama	A1767_015H4_RH4_01_13998.mzXML	0	PAB04APR06.1 red lyngbya	FALSE	0	ENVO:marine biome	ENVO:sea water	ENVO:organic material	red lyngbya	F	TRUE	TRUE	red lyngbya	cyanobacteria	A1767.015H4.RH4.01.13998	1117	9.28132	-82.1026	UCSD	UCSDMI	TRUE	FALSE	completed	UCSD	cyanobacteria	408172	Cyanobacteria	PAB
10125.A1767.015H5.RH5.01.13999.mzXML	0	A1767_015H5_RH5_01_13999.mzXML	TRUE	2006-04-04	marine metagenome	GAZ:Panama	A1767_015H5_RH5_01_13999.mzXML	0	PAB04APR06.1 red lyngbya	FALSE	0	ENVO:marine biome	ENVO:sea water	ENVO:organic material	red lyngbya	G	TRUE	TRUE	red lyngbya	cyanobacteria	A1767.015H5.RH5.01.13999	1117	9.28132	-82.1026	UCSD	UCSDMI	TRUE	FALSE	completed	UCSD	cyanobacteria	408172	Cyanobacteria	PAB
10125.A1767.015H6.RH6.01.14000.mzXML	0	A1767_015H6_RH6_01_14000.mzXML	TRUE	2006-04-04	marine metagenome	GAZ:Panama	A1767_015H6_RH6_01_14000.mzXML	0	PAB04APR06.1 red lyngbya	FALSE	0	ENVO:marine biome	ENVO:sea water	ENVO:organic material	red lyngbya	H	TRUE	TRUE	red lyngbya	cyanobacteria	A1767.015H6.RH6.01.14000	1117	9.28132	-82.1026	UCSD	UCSDMI	TRUE	FALSE	completed	UCSD	cyanobacteria	408172	Cyanobacteria	PAB
10125.A1767.015H7.RH7.01.14001.mzXML	0	A1767_015H7_RH7_01_14001.mzXML	TRUE	2006-04-04	marine metagenome	GAZ:Panama	A1767_015H7_RH7_01_14001.mzXML	0	PAB04APR06.1 red lyngbya	FALSE	0	ENVO:marine biome	ENVO:sea water	ENVO:organic material	red lyngbya	I	TRUE	TRUE	red lyngbya	cyanobacteria	A1767.015H7.RH7.01.14001	1117	9.28132	-82.1026	UCSD	UCSDMI	TRUE	FALSE	completed	UCSD	cyanobacteria	408172	Cyanobacteria	PAB
10125.A1770.016B4.GB4.01.14029.mzXML	0	A1770_016B4_GB4_01_14029.mzXML	TRUE	2007-11-16	marine metagenome	GAZ:Panama	A1770_016B4_GB4_01_14029.mzXML	0	PAB16NOV07.4 black lyngbya	FALSE	0	ENVO:marine biome	ENVO:sea water	ENVO:organic material	black lyngbya	Crude	TRUE	TRUE	black lyngbya	cyanobacteria	A1770.016B4.GB4.01.14029	1117	9.26997	-82.1834	UCSD	UCSDMI	TRUE	FALSE	completed	UCSD	cyanobacteria	408172	Cyanobacteria	PAB
10125.A1771.016B5.GB5.01.14031.mzXML	0	A1771_016B5_GB5_01_14031.mzXML	TRUE	2007-11-16	marine metagenome	GAZ:Panama	A1771_016B5_GB5_01_14031.mzXML	0	PAB16NOV07.1A schizothrix sp.	FALSE	0	ENVO:marine biome	ENVO:sea water	ENVO:organic material	schizothrix sp.	Crude	TRUE	TRUE	schizothrix sp.	cyanobacteria	A1771.016B5.GB5.01.14031	1117	9.29117	-82.1931	UCSD	UCSDMI	TRUE	FALSE	completed	UCSD	cyanobacteria	408172	Cyanobacteria	PAB
10125.A1847.021A1.RA1.01.14539.mzXML	0	A1847_021A1_RA1_01_14539.mzXML	TRUE	2009-06-18	marine metagenome	GAZ:Panama	A1847_021A1_RA1_01_14539.mzXML	0	PAB18JUN09.1 woolly symploca	FALSE	0	ENVO:marine biome	ENVO:sea water	ENVO:organic material	woolly symploca	Crude	TRUE	TRUE	woolly symploca	cyanobacteria	A1847.021A1.RA1.01.14539	1117	9.25433	-82.1622	UCSD	UCSDMI	TRUE	FALSE	completed	UCSD	cyanobacteria	408172	Cyanobacteria	PAB
10125.A1847.021A10.RA10.01.14548.mzXML	0	A1847_021A10_RA10_01_14548.mzXML	TRUE	2009-06-18	marine metagenome	GAZ:Panama	A1847_021A10_RA10_01_14548.mzXML	0	PAB18JUN09.1 woolly symploca	FALSE	0	ENVO:marine biome	ENVO:sea water	ENVO:organic material	woolly symploca	I	TRUE	TRUE	woolly symploca	cyanobacteria	A1847.021A10.RA10.01.14548	1117	9.25433	-82.1622	UCSD	UCSDMI	TRUE	FALSE	completed	UCSD	cyanobacteria	408172	Cyanobacteria	PAB
10125.A1847.021A2.RA2.01.14540.mzXML	0	A1847_021A2_RA2_01_14540.mzXML	TRUE	2009-06-18	marine metagenome	GAZ:Panama	A1847_021A2_RA2_01_14540.mzXML	0	PAB18JUN09.1 woolly symploca	FALSE	0	ENVO:marine biome	ENVO:sea water	ENVO:organic material	woolly symploca	A	TRUE	TRUE	woolly symploca	cyanobacteria	A1847.021A2.RA2.01.14540	1117	9.25433	-82.1622	UCSD	UCSDMI	TRUE	FALSE	completed	UCSD	cyanobacteria	408172	Cyanobacteria	PAB
10125.A1847.021A3.RA3.01.14541.mzXML	0	A1847_021A3_RA3_01_14541.mzXML	TRUE	2009-06-18	marine metagenome	GAZ:Panama	A1847_021A3_RA3_01_14541.mzXML	0	PAB18JUN09.1 woolly symploca	FALSE	0	ENVO:marine biome	ENVO:sea water	ENVO:organic material	woolly symploca	B	TRUE	TRUE	woolly symploca	cyanobacteria	A1847.021A3.RA3.01.14541	1117	9.25433	-82.1622	UCSD	UCSDMI	TRUE	FALSE	completed	UCSD	cyanobacteria	408172	Cyanobacteria	PAB
10125.A1847.021A4.RA4.01.14542.mzXML	0	A1847_021A4_RA4_01_14542.mzXML	TRUE	2009-06-18	marine metagenome	GAZ:Panama	A1847_021A4_RA4_01_14542.mzXML	0	PAB18JUN09.1 woolly symploca	FALSE	0	ENVO:marine biome	ENVO:sea water	ENVO:organic material	woolly symploca	C	TRUE	TRUE	woolly symploca	cyanobacteria	A1847.021A4.RA4.01.14542	1117	9.25433	-82.1622	UCSD	UCSDMI	TRUE	FALSE	completed	UCSD	cyanobacteria	408172	Cyanobacteria	PAB
10125.A1847.021A5.RA5.01.14543.mzXML	0	A1847_021A5_RA5_01_14543.mzXML	TRUE	2009-06-18	marine metagenome	GAZ:Panama	A1847_021A5_RA5_01_14543.mzXML	0	PAB18JUN09.1 woolly symploca	FALSE	0	ENVO:marine biome	ENVO:sea water	ENVO:organic material	woolly symploca	D	TRUE	TRUE	woolly symploca	cyanobacteria	A1847.021A5.RA5.01.14543	1117	9.25433	-82.1622	UCSD	UCSDMI	TRUE	FALSE	completed	UCSD	cyanobacteria	408172	Cyanobacteria	PAB
10125.A1847.021A6.RA6.01.14544.mzXML	0	A1847_021A6_RA6_01_14544.mzXML	TRUE	2009-06-18	marine metagenome	GAZ:Panama	A1847_021A6_RA6_01_14544.mzXML	0	PAB18JUN09.1 woolly symploca	FALSE	0	ENVO:marine biome	ENVO:sea water	ENVO:organic material	woolly symploca	E	TRUE	TRUE	woolly symploca	cyanobacteria	A1847.021A6.RA6.01.14544	1117	9.25433	-82.1622	UCSD	UCSDMI	TRUE	FALSE	completed	UCSD	cyanobacteria	408172	Cyanobacteria	PAB
10125.A1847.021A7.RA7.01.14545.mzXML	0	A1847_021A7_RA7_01_14545.mzXML	TRUE	2009-06-18	marine metagenome	GAZ:Panama	A1847_021A7_RA7_01_14545.mzXML	0	PAB18JUN09.1 woolly symploca	FALSE	0	ENVO:marine biome	ENVO:sea water	ENVO:organic material	woolly symploca	F	TRUE	TRUE	woolly symploca	cyanobacteria	A1847.021A7.RA7.01.14545	1117	9.25433	-82.1622	UCSD	UCSDMI	TRUE	FALSE	completed	UCSD	cyanobacteria	408172	Cyanobacteria	PAB
10125.A1847.021A8.RA8.01.14546.mzXML	0	A1847_021A8_RA8_01_14546.mzXML	TRUE	2009-06-18	marine metagenome	GAZ:Panama	A1847_021A8_RA8_01_14546.mzXML	0	PAB18JUN09.1 woolly symploca	FALSE	0	ENVO:marine biome	ENVO:sea water	ENVO:organic material	woolly symploca	G	TRUE	TRUE	woolly symploca	cyanobacteria	A1847.021A8.RA8.01.14546	1117	9.25433	-82.1622	UCSD	UCSDMI	TRUE	FALSE	completed	UCSD	cyanobacteria	408172	Cyanobacteria	PAB
10125.A1847.021A9.RA9.01.14547.mzXML	0	A1847_021A9_RA9_01_14547.mzXML	TRUE	2009-06-18	marine metagenome	GAZ:Panama	A1847_021A9_RA9_01_14547.mzXML	0	PAB18JUN09.1 woolly symploca	FALSE	0	ENVO:marine biome	ENVO:sea water	ENVO:organic material	woolly symploca	H	TRUE	TRUE	woolly symploca	cyanobacteria	A1847.021A9.RA9.01.14547	1117	9.25433	-82.1622	UCSD	UCSDMI	TRUE	FALSE	completed	UCSD	cyanobacteria	408172	Cyanobacteria	PAB
10125.1617.006E1.GE1.01.13049.mzXML	0	1617_006E1_GE1_01_13049.mzXML	TRUE	2005-11-06	marine metagenome	GAZ:Panama Bocas del Toro	1617_006E1_GE1_01_13049.mzXML	0	PAB6NOV05.1 Symploca probablesp.	FALSE	0	ENVO:marine biome	ENVO:sea water	ENVO:organic material	Symploca probablesp.	Crude	TRUE	TRUE	Symploca probablesp.	cyanobacteria	1617.006E1.GE1.01.13049	1117	9.28493	-82.1913	UCSD	UCSDMI	TRUE	FALSE	completed	UCSD	cyanobacteria	408172	Cyanobacteria	PAB
10125.1617.006E2.GE2.01.13050.mzXML	0	1617_006E2_GE2_01_13050.mzXML	TRUE	2005-11-06	marine metagenome	GAZ:Panama Bocas del Toro	1617_006E2_GE2_01_13050.mzXML	0	PAB6NOV05.1 Symploca probablesp.	FALSE	0	ENVO:marine biome	ENVO:sea water	ENVO:organic material	Symploca probablesp.	A	TRUE	TRUE	Symploca probablesp.	cyanobacteria	1617.006E2.GE2.01.13050	1117	9.28493	-82.1913	UCSD	UCSDMI	TRUE	FALSE	completed	UCSD	cyanobacteria	408172	Cyanobacteria	PAB
10125.1617.006E3.GE3.01.13051.mzXML	0	1617_006E3_GE3_01_13051.mzXML	TRUE	2005-11-06	marine metagenome	GAZ:Panama Bocas del Toro	1617_006E3_GE3_01_13051.mzXML	0	PAB6NOV05.1 Symploca probablesp.	FALSE	0	ENVO:marine biome	ENVO:sea water	ENVO:organic material	Symploca probablesp.	B	TRUE	TRUE	Symploca probablesp.	cyanobacteria	1617.006E3.GE3.01.13051	1117	9.28493	-82.1913	UCSD	UCSDMI	TRUE	FALSE	completed	UCSD	cyanobacteria	408172	Cyanobacteria	PAB
10125.1617.006E4.GE4.01.13052.mzXML	0	1617_006E4_GE4_01_13052.mzXML	TRUE	2005-11-06	marine metagenome	GAZ:Panama Bocas del Toro	1617_006E4_GE4_01_13052.mzXML	0	PAB6NOV05.1 Symploca probablesp.	FALSE	0	ENVO:marine biome	ENVO:sea water	ENVO:organic material	Symploca probablesp.	C	TRUE	TRUE	Symploca probablesp.	cyanobacteria	1617.006E4.GE4.01.13052	1117	9.28493	-82.1913	UCSD	UCSDMI	TRUE	FALSE	completed	UCSD	cyanobacteria	408172	Cyanobacteria	PAB
10125.1617.006E5.GE5.01.13053.mzXML	0	1617_006E5_GE5_01_13053.mzXML	TRUE	2005-11-06	marine metagenome	GAZ:Panama Bocas del Toro	1617_006E5_GE5_01_13053.mzXML	0	PAB6NOV05.1 Symploca probablesp.	FALSE	0	ENVO:marine biome	ENVO:sea water	ENVO:organic material	Symploca probablesp.	D	TRUE	TRUE	Symploca probablesp.	cyanobacteria	1617.006E5.GE5.01.13053	1117	9.28493	-82.1913	UCSD	UCSDMI	TRUE	FALSE	completed	UCSD	cyanobacteria	408172	Cyanobacteria	PAB
10125.1617.006E6.GE6.01.13054.mzXML	0	1617_006E6_GE6_01_13054.mzXML	TRUE	2005-11-06	marine metagenome	GAZ:Panama Bocas del Toro	1617_006E6_GE6_01_13054.mzXML	0	PAB6NOV05.1 Symploca probablesp.	FALSE	0	ENVO:marine biome	ENVO:sea water	ENVO:organic material	Symploca probablesp.	F	TRUE	TRUE	Symploca probablesp.	cyanobacteria	1617.006E6.GE6.01.13054	1117	9.28493	-82.1913	UCSD	UCSDMI	TRUE	FALSE	completed	UCSD	cyanobacteria	408172	Cyanobacteria	PAB
10125.1617.006E7.GE7.01.13055.mzXML	0	1617_006E7_GE7_01_13055.mzXML	TRUE	2005-11-06	marine metagenome	GAZ:Panama Bocas del Toro	1617_006E7_GE7_01_13055.mzXML	0	PAB6NOV05.1 Symploca probablesp.	FALSE	0	ENVO:marine biome	ENVO:sea water	ENVO:organic material	Symploca probablesp.	H	TRUE	TRUE	Symploca probablesp.	cyanobacteria	1617.006E7.GE7.01.13055	1117	9.28493	-82.1913	UCSD	UCSDMI	TRUE	FALSE	completed	UCSD	cyanobacteria	408172	Cyanobacteria	PAB
10125.1617.006E8.GE8.01.13056.mzXML	0	1617_006E8_GE8_01_13056.mzXML	TRUE	2005-11-06	marine metagenome	GAZ:Panama Bocas del Toro	1617_006E8_GE8_01_13056.mzXML	0	PAB6NOV05.1 Symploca probablesp.	FALSE	0	ENVO:marine biome	ENVO:sea water	ENVO:organic material	Symploca probablesp.	I	TRUE	TRUE	Symploca probablesp.	cyanobacteria	1617.006E8.GE8.01.13056	1117	9.28493	-82.1913	UCSD	UCSDMI	TRUE	FALSE	completed	UCSD	cyanobacteria	408172	Cyanobacteria	PAB
10125.1623.007A10.RA10.01.13111.mzXML	0	1623_007A10_RA10_01_13111.mzXML	TRUE	2005-11-04	marine metagenome	GAZ:Panama Bocas del Toro	1623_007A10_RA10_01_13111.mzXML	0	PAB4NOV05.1 Black Lyngbya sp.	FALSE	0	ENVO:marine biome	ENVO:sea water	ENVO:organic material	Black Lyngbya sp.	F	TRUE	TRUE	Black Lyngbya sp.	cyanobacteria	1623.007A10.RA10.01.13111	1117	9.24472	-82.1394	UCSD	UCSDMI	TRUE	FALSE	completed	UCSD	cyanobacteria	408172	Cyanobacteria	PAB
10125.1623.007A11.RA11.01.13112.mzXML	0	1623_007A11_RA11_01_13112.mzXML	TRUE	2005-11-04	marine metagenome	GAZ:Panama Bocas del Toro	1623_007A11_RA11_01_13112.mzXML	0	PAB4NOV05.1 Black Lyngbya sp.	FALSE	0	ENVO:marine biome	ENVO:sea water	ENVO:organic material	Black Lyngbya sp.	G	TRUE	TRUE	Black Lyngbya sp.	cyanobacteria	1623.007A11.RA11.01.13112	1117	9.24472	-82.1394	UCSD	UCSDMI	TRUE	FALSE	completed	UCSD	cyanobacteria	408172	Cyanobacteria	PAB
10125.1623.007A5.RA5.01.13106.mzXML	0	1623_007A5_RA5_01_13106.mzXML	TRUE	2005-11-04	marine metagenome	GAZ:Panama Bocas del Toro	1623_007A5_RA5_01_13106.mzXML	0	PAB4NOV05.1 Black Lyngbya sp.	FALSE	0	ENVO:marine biome	ENVO:sea water	ENVO:organic material	Black Lyngbya sp.	Crude	TRUE	TRUE	Black Lyngbya sp.	cyanobacteria	1623.007A5.RA5.01.13106	1117	9.24472	-82.1394	UCSD	UCSDMI	TRUE	FALSE	completed	UCSD	cyanobacteria	408172	Cyanobacteria	PAB
10125.1623.007A6.RA6.01.13107.mzXML	0	1623_007A6_RA6_01_13107.mzXML	TRUE	2005-11-04	marine metagenome	GAZ:Panama Bocas del Toro	1623_007A6_RA6_01_13107.mzXML	0	PAB4NOV05.1 Black Lyngbya sp.	FALSE	0	ENVO:marine biome	ENVO:sea water	ENVO:organic material	Black Lyngbya sp.	A	TRUE	TRUE	Black Lyngbya sp.	cyanobacteria	1623.007A6.RA6.01.13107	1117	9.24472	-82.1394	UCSD	UCSDMI	TRUE	FALSE	completed	UCSD	cyanobacteria	408172	Cyanobacteria	PAB
10125.1623.007A7.RA7.01.13108.mzXML	0	1623_007A7_RA7_01_13108.mzXML	TRUE	2005-11-04	marine metagenome	GAZ:Panama Bocas del Toro	1623_007A7_RA7_01_13108.mzXML	0	PAB4NOV05.1 Black Lyngbya sp.	FALSE	0	ENVO:marine biome	ENVO:sea water	ENVO:organic material	Black Lyngbya sp.	B	TRUE	TRUE	Black Lyngbya sp.	cyanobacteria	1623.007A7.RA7.01.13108	1117	9.24472	-82.1394	UCSD	UCSDMI	TRUE	FALSE	completed	UCSD	cyanobacteria	408172	Cyanobacteria	PAB
10125.1623.007A8.RA8.01.13109.mzXML	0	1623_007A8_RA8_01_13109.mzXML	TRUE	2005-11-04	marine metagenome	GAZ:Panama Bocas del Toro	1623_007A8_RA8_01_13109.mzXML	0	PAB4NOV05.1 Black Lyngbya sp.	FALSE	0	ENVO:marine biome	ENVO:sea water	ENVO:organic material	Black Lyngbya sp.	E	TRUE	TRUE	Black Lyngbya sp.	cyanobacteria	1623.007A8.RA8.01.13109	1117	9.24472	-82.1394	UCSD	UCSDMI	TRUE	FALSE	completed	UCSD	cyanobacteria	408172	Cyanobacteria	PAB
10125.1623.007A9.RA9.01.13110.mzXML	0	1623_007A9_RA9_01_13110.mzXML	TRUE	2005-11-04	marine metagenome	GAZ:Panama Bocas del Toro	1623_007A9_RA9_01_13110.mzXML	0	PAB4NOV05.1 Black Lyngbya sp.	FALSE	0	ENVO:marine biome	ENVO:sea water	ENVO:organic material	Black Lyngbya sp.	D	TRUE	TRUE	Black Lyngbya sp.	cyanobacteria	1623.007A9.RA9.01.13110	1117	9.24472	-82.1394	UCSD	UCSDMI	TRUE	FALSE	completed	UCSD	cyanobacteria	408172	Cyanobacteria	PAB
10125.1623.007B1.RB1.01.13114.mzXML	0	1623_007B1_RB1_01_13114.mzXML	TRUE	2005-11-04	marine metagenome	GAZ:Panama Bocas del Toro	1623_007B1_RB1_01_13114.mzXML	0	PAB4NOV05.1 Black Lyngbya sp.	FALSE	0	ENVO:marine biome	ENVO:sea water	ENVO:organic material	Black Lyngbya sp.	I	TRUE	TRUE	Black Lyngbya sp.	cyanobacteria	1623.007B1.RB1.01.13114	1117	9.24472	-82.1394	UCSD	UCSDMI	TRUE	FALSE	completed	UCSD	cyanobacteria	408172	Cyanobacteria	PAB
10125.1623.007G7.RG7.01.13113.mzXML	0	1623_007G7_RG7_01_13113.mzXML	TRUE	2005-11-04	marine metagenome	GAZ:Panama Bocas del Toro	1623_007G7_RG7_01_13113.mzXML	0	PAB4NOV05.1 Black Lyngbya sp.	FALSE	0	ENVO:marine biome	ENVO:sea water	ENVO:organic material	Black Lyngbya sp.	H	TRUE	TRUE	Black Lyngbya sp.	cyanobacteria	1623.007G7.RG7.01.13113	1117	9.24472	-82.1394	UCSD	UCSDMI	TRUE	FALSE	completed	UCSD	cyanobacteria	408172	Cyanobacteria	PAB
10125.1627.007D4.RD4.01.13143.mzXML	0	1627_007D4_RD4_01_13143.mzXML	TRUE	2005-11-04	marine metagenome	GAZ:Panama Bocas del Toro	1627_007D4_RD4_01_13143.mzXML	0	PAB4NOV05.7 Red Lyngbya sp.	FALSE	0	ENVO:marine biome	ENVO:sea water	ENVO:organic material	Red Lyngbya sp.	Crude	TRUE	TRUE	Red Lyngbya sp.	cyanobacteria	1627.007D4.RD4.01.13143	1117	9.27782	-82.1639	UCSD	UCSDMI	TRUE	FALSE	completed	UCSD	cyanobacteria	408172	Cyanobacteria	PAB
10125.1627.007D5.RD5.01.13144.mzXML	0	1627_007D5_RD5_01_13144.mzXML	TRUE	2005-11-04	marine metagenome	GAZ:Panama Bocas del Toro	1627_007D5_RD5_01_13144.mzXML	0	PAB4NOV05.7 Red Lyngbya sp.	FALSE	0	ENVO:marine biome	ENVO:sea water	ENVO:organic material	Red Lyngbya sp.	A	TRUE	TRUE	Red Lyngbya sp.	cyanobacteria	1627.007D5.RD5.01.13144	1117	9.27782	-82.1639	UCSD	UCSDMI	TRUE	FALSE	completed	UCSD	cyanobacteria	408172	Cyanobacteria	PAB
10125.1627.007D6.RD6.01.13145.mzXML	0	1627_007D6_RD6_01_13145.mzXML	TRUE	2005-11-04	marine metagenome	GAZ:Panama Bocas del Toro	1627_007D6_RD6_01_13145.mzXML	0	PAB4NOV05.7 Red Lyngbya sp.	FALSE	0	ENVO:marine biome	ENVO:sea water	ENVO:organic material	Red Lyngbya sp.	D	TRUE	TRUE	Red Lyngbya sp.	cyanobacteria	1627.007D6.RD6.01.13145	1117	9.27782	-82.1639	UCSD	UCSDMI	TRUE	FALSE	completed	UCSD	cyanobacteria	408172	Cyanobacteria	PAB
10125.1627.007D7.RD7.01.13146.mzXML	0	1627_007D7_RD7_01_13146.mzXML	TRUE	2005-11-04	marine metagenome	GAZ:Panama Bocas del Toro	1627_007D7_RD7_01_13146.mzXML	0	PAB4NOV05.7 Red Lyngbya sp.	FALSE	0	ENVO:marine biome	ENVO:sea water	ENVO:organic material	Red Lyngbya sp.	E	TRUE	TRUE	Red Lyngbya sp.	cyanobacteria	1627.007D7.RD7.01.13146	1117	9.27782	-82.1639	UCSD	UCSDMI	TRUE	FALSE	completed	UCSD	cyanobacteria	408172	Cyanobacteria	PAB
10125.1627.007D8.RD8.01.13147.mzXML	0	1627_007D8_RD8_01_13147.mzXML	TRUE	2005-11-04	marine metagenome	GAZ:Panama Bocas del Toro	1627_007D8_RD8_01_13147.mzXML	0	PAB4NOV05.7 Red Lyngbya sp.	FALSE	0	ENVO:marine biome	ENVO:sea water	ENVO:organic material	Red Lyngbya sp.	I	TRUE	TRUE	Red Lyngbya sp.	cyanobacteria	1627.007D8.RD8.01.13147	1117	9.27782	-82.1639	UCSD	UCSDMI	TRUE	FALSE	completed	UCSD	cyanobacteria	408172	Cyanobacteria	PAB
10125.1631.007F10.RF10.01.13175.mzXML	0	1631_007F10_RF10_01_13175.mzXML	TRUE	2005-11-04	marine metagenome	GAZ:Panama Bocas del Toro	1631_007F10_RF10_01_13175.mzXML	0	PAB4NOV05.7 Red Lyngbya sp.	FALSE	0	ENVO:marine biome	ENVO:sea water	ENVO:organic material	Red Lyngbya sp.	A	TRUE	TRUE	Red Lyngbya sp.	cyanobacteria	1631.007F10.RF10.01.13175	1117	9.28913	-82.1714	UCSD	UCSDMI	TRUE	FALSE	completed	UCSD	cyanobacteria	408172	Cyanobacteria	PAB
10125.1631.007F11.RF11.01.13176.mzXML	0	1631_007F11_RF11_01_13176.mzXML	TRUE	2005-11-04	marine metagenome	GAZ:Panama Bocas del Toro	1631_007F11_RF11_01_13176.mzXML	0	PAB4NOV05.7 Red Lyngbya sp.	FALSE	0	ENVO:marine biome	ENVO:sea water	ENVO:organic material	Red Lyngbya sp.	B	TRUE	TRUE	Red Lyngbya sp.	cyanobacteria	1631.007F11.RF11.01.13176	1117	9.28913	-82.1714	UCSD	UCSDMI	TRUE	FALSE	completed	UCSD	cyanobacteria	408172	Cyanobacteria	PAB
10125.1631.007F9.RF9.01.13174.mzXML	0	1631_007F9_RF9_01_13174.mzXML	TRUE	2005-11-04	marine metagenome	GAZ:Panama Bocas del Toro	1631_007F9_RF9_01_13174.mzXML	0	PAB4NOV05.7 Red Lyngbya sp.	FALSE	0	ENVO:marine biome	ENVO:sea water	ENVO:organic material	Red Lyngbya sp.	Crude	TRUE	TRUE	Red Lyngbya sp.	cyanobacteria	1631.007F9.RF9.01.13174	1117	9.28913	-82.1714	UCSD	UCSDMI	TRUE	FALSE	completed	UCSD	cyanobacteria	408172	Cyanobacteria	PAB
10125.1631.007G1.RG1.01.13177.mzXML	0	1631_007G1_RG1_01_13177.mzXML	TRUE	2005-11-04	marine metagenome	GAZ:Panama Bocas del Toro	1631_007G1_RG1_01_13177.mzXML	0	PAB4NOV05.7 Red Lyngbya sp.	FALSE	0	ENVO:marine biome	ENVO:sea water	ENVO:organic material	Red Lyngbya sp.	C	TRUE	TRUE	Red Lyngbya sp.	cyanobacteria	1631.007G1.RG1.01.13177	1117	9.28913	-82.1714	UCSD	UCSDMI	TRUE	FALSE	completed	UCSD	cyanobacteria	408172	Cyanobacteria	PAB
10125.1631.007G2.RG2.01.13178.mzXML	0	1631_007G2_RG2_01_13178.mzXML	TRUE	2005-11-04	marine metagenome	GAZ:Panama Bocas del Toro	1631_007G2_RG2_01_13178.mzXML	0	PAB4NOV05.7 Red Lyngbya sp.	FALSE	0	ENVO:marine biome	ENVO:sea water	ENVO:organic material	Red Lyngbya sp.	D	TRUE	TRUE	Red Lyngbya sp.	cyanobacteria	1631.007G2.RG2.01.13178	1117	9.28913	-82.1714	UCSD	UCSDMI	TRUE	FALSE	completed	UCSD	cyanobacteria	408172	Cyanobacteria	PAB
10125.1631.007G3.RG3.01.13179.mzXML	0	1631_007G3_RG3_01_13179.mzXML	TRUE	2005-11-04	marine metagenome	GAZ:Panama Bocas del Toro	1631_007G3_RG3_01_13179.mzXML	0	PAB4NOV05.7 Red Lyngbya sp.	FALSE	0	ENVO:marine biome	ENVO:sea water	ENVO:organic material	Red Lyngbya sp.	F	TRUE	TRUE	Red Lyngbya sp.	cyanobacteria	1631.007G3.RG3.01.13179	1117	9.28913	-82.1714	UCSD	UCSDMI	TRUE	FALSE	completed	UCSD	cyanobacteria	408172	Cyanobacteria	PAB
10125.1631.007G4.RG4.01.13180.mzXML	0	1631_007G4_RG4_01_13180.mzXML	TRUE	2005-11-04	marine metagenome	GAZ:Panama Bocas del Toro	1631_007G4_RG4_01_13180.mzXML	0	PAB4NOV05.7 Red Lyngbya sp.	FALSE	0	ENVO:marine biome	ENVO:sea water	ENVO:organic material	Red Lyngbya sp.	G	TRUE	TRUE	Red Lyngbya sp.	cyanobacteria	1631.007G4.RG4.01.13180	1117	9.28913	-82.1714	UCSD	UCSDMI	TRUE	FALSE	completed	UCSD	cyanobacteria	408172	Cyanobacteria	PAB
10125.1631.007G5.RG5.01.13181.mzXML	0	1631_007G5_RG5_01_13181.mzXML	TRUE	2005-11-04	marine metagenome	GAZ:Panama Bocas del Toro	1631_007G5_RG5_01_13181.mzXML	0	PAB4NOV05.7 Red Lyngbya sp.	FALSE	0	ENVO:marine biome	ENVO:sea water	ENVO:organic material	Red Lyngbya sp.	H	TRUE	TRUE	Red Lyngbya sp.	cyanobacteria	1631.007G5.RG5.01.13181	1117	9.28913	-82.1714	UCSD	UCSDMI	TRUE	FALSE	completed	UCSD	cyanobacteria	408172	Cyanobacteria	PAB
10125.1631.007G6.RG6.01.13182.mzXML	0	1631_007G6_RG6_01_13182.mzXML	TRUE	2005-11-04	marine metagenome	GAZ:Panama Bocas del Toro	1631_007G6_RG6_01_13182.mzXML	0	PAB4NOV05.7 Red Lyngbya sp.	FALSE	0	ENVO:marine biome	ENVO:sea water	ENVO:organic material	Red Lyngbya sp.	I	TRUE	TRUE	Red Lyngbya sp.	cyanobacteria	1631.007G6.RG6.01.13182	1117	9.28913	-82.1714	UCSD	UCSDMI	TRUE	FALSE	completed	UCSD	cyanobacteria	408172	Cyanobacteria	PAB
10125.1632.007G10.RG10.01.13186.mzXML	0	1632_007G10_RG10_01_13186.mzXML	TRUE	2006-07-28	marine metagenome	GAZ:Panama Bocas del Toro	1632_007G10_RG10_01_13186.mzXML	0	PAB28JUL06.1 Red lyngbya	FALSE	0	ENVO:marine biome	ENVO:sea water	ENVO:organic material	Red lyngbya	B	TRUE	TRUE	Red lyngbya	cyanobacteria	1632.007G10.RG10.01.13186	1117	9.24482	-82.1394	UCSD	UCSDMI	TRUE	FALSE	completed	UCSD	cyanobacteria	408172	Cyanobacteria	PAB
10125.1632.007G11.RG11.01.13187.mzXML	0	1632_007G11_RG11_01_13187.mzXML	TRUE	2006-07-28	marine metagenome	GAZ:Panama Bocas del Toro	1632_007G11_RG11_01_13187.mzXML	0	PAB28JUL06.1 Red lyngbya	FALSE	0	ENVO:marine biome	ENVO:sea water	ENVO:organic material	Red lyngbya	C	TRUE	TRUE	Red lyngbya	cyanobacteria	1632.007G11.RG11.01.13187	1117	9.24482	-82.1394	UCSD	UCSDMI	TRUE	FALSE	completed	UCSD	cyanobacteria	408172	Cyanobacteria	PAB
10125.1632.007G8.RG8.01.13184.mzXML	0	1632_007G8_RG8_01_13184.mzXML	TRUE	2006-07-28	marine metagenome	GAZ:Panama Bocas del Toro	1632_007G8_RG8_01_13184.mzXML	0	PAB28JUL06.1 Red lyngbya	FALSE	0	ENVO:marine biome	ENVO:sea water	ENVO:organic material	Red lyngbya	Crude	TRUE	TRUE	Red lyngbya	cyanobacteria	1632.007G8.RG8.01.13184	1117	9.24482	-82.1394	UCSD	UCSDMI	TRUE	FALSE	completed	UCSD	cyanobacteria	408172	Cyanobacteria	PAB
10125.1632.007H1.RH1.01.13188.mzXML	0	1632_007H1_RH1_01_13188.mzXML	TRUE	2006-07-28	marine metagenome	GAZ:Panama Bocas del Toro	1632_007H1_RH1_01_13188.mzXML	0	PAB28JUL06.1 Red lyngbya	FALSE	0	ENVO:marine biome	ENVO:sea water	ENVO:organic material	Red lyngbya	E	TRUE	TRUE	Red lyngbya	cyanobacteria	1632.007H1.RH1.01.13188	1117	9.24482	-82.1394	UCSD	UCSDMI	TRUE	FALSE	completed	UCSD	cyanobacteria	408172	Cyanobacteria	PAB
10125.1632.007H2.RH2.01.13189.mzXML	0	1632_007H2_RH2_01_13189.mzXML	TRUE	2006-07-28	marine metagenome	GAZ:Panama Bocas del Toro	1632_007H2_RH2_01_13189.mzXML	0	PAB28JUL06.1 Red lyngbya	FALSE	0	ENVO:marine biome	ENVO:sea water	ENVO:organic material	Red lyngbya	H	TRUE	TRUE	Red lyngbya	cyanobacteria	1632.007H2.RH2.01.13189	1117	9.24482	-82.1394	UCSD	UCSDMI	TRUE	FALSE	completed	UCSD	cyanobacteria	408172	Cyanobacteria	PAB
10125.1633.007H10.RH10.01.13198.mzXML	0	1633_007H10_RH10_01_13198.mzXML	TRUE	2006-04-03	marine metagenome	GAZ:Panama Bocas del Toro	1633_007H10_RH10_01_13198.mzXML	0	PAB3APR06.5 Black Lyngbya sp.	FALSE	0	ENVO:marine biome	ENVO:sea water	ENVO:organic material	Black Lyngbya sp.	I	TRUE	TRUE	Black Lyngbya sp.	cyanobacteria	1633.007H10.RH10.01.13198	1117	9.25433	-82.1622	UCSD	UCSDMI	TRUE	FALSE	completed	UCSD	cyanobacteria	408172	Cyanobacteria	PAB
10125.1633.007H4.RH4.01.13192.mzXML	0	1633_007H4_RH4_01_13192.mzXML	TRUE	2006-04-03	marine metagenome	GAZ:Panama Bocas del Toro	1633_007H4_RH4_01_13192.mzXML	0	PAB3APR06.5 Black Lyngbya sp.	FALSE	0	ENVO:marine biome	ENVO:sea water	ENVO:organic material	Black Lyngbya sp.	Crude	TRUE	TRUE	Black Lyngbya sp.	cyanobacteria	1633.007H4.RH4.01.13192	1117	9.25433	-82.1622	UCSD	UCSDMI	TRUE	FALSE	completed	UCSD	cyanobacteria	408172	Cyanobacteria	PAB
10125.1633.007H5.RH5.01.13193.mzXML	0	1633_007H5_RH5_01_13193.mzXML	TRUE	2006-04-03	marine metagenome	GAZ:Panama Bocas del Toro	1633_007H5_RH5_01_13193.mzXML	0	PAB3APR06.5 Black Lyngbya sp.	FALSE	0	ENVO:marine biome	ENVO:sea water	ENVO:organic material	Black Lyngbya sp.	A	TRUE	TRUE	Black Lyngbya sp.	cyanobacteria	1633.007H5.RH5.01.13193	1117	9.25433	-82.1622	UCSD	UCSDMI	TRUE	FALSE	completed	UCSD	cyanobacteria	408172	Cyanobacteria	PAB
10125.1633.007H6.RH6.01.13194.mzXML	0	1633_007H6_RH6_01_13194.mzXML	TRUE	2006-04-03	marine metagenome	GAZ:Panama Bocas del Toro	1633_007H6_RH6_01_13194.mzXML	0	PAB3APR06.5 Black Lyngbya sp.	FALSE	0	ENVO:marine biome	ENVO:sea water	ENVO:organic material	Black Lyngbya sp.	B	TRUE	TRUE	Black Lyngbya sp.	cyanobacteria	1633.007H6.RH6.01.13194	1117	9.25433	-82.1622	UCSD	UCSDMI	TRUE	FALSE	completed	UCSD	cyanobacteria	408172	Cyanobacteria	PAB
10125.1633.007H7.RH7.01.13195.mzXML	0	1633_007H7_RH7_01_13195.mzXML	TRUE	2006-04-03	marine metagenome	GAZ:Panama Bocas del Toro	1633_007H7_RH7_01_13195.mzXML	0	PAB3APR06.5 Black Lyngbya sp.	FALSE	0	ENVO:marine biome	ENVO:sea water	ENVO:organic material	Black Lyngbya sp.	C	TRUE	TRUE	Black Lyngbya sp.	cyanobacteria	1633.007H7.RH7.01.13195	1117	9.25433	-82.1622	UCSD	UCSDMI	TRUE	FALSE	completed	UCSD	cyanobacteria	408172	Cyanobacteria	PAB
10125.1633.007H8.RH8.01.13196.mzXML	0	1633_007H8_RH8_01_13196.mzXML	TRUE	2006-04-03	marine metagenome	GAZ:Panama Bocas del Toro	1633_007H8_RH8_01_13196.mzXML	0	PAB3APR06.5 Black Lyngbya sp.	FALSE	0	ENVO:marine biome	ENVO:sea water	ENVO:organic material	Black Lyngbya sp.	D	TRUE	TRUE	Black Lyngbya sp.	cyanobacteria	1633.007H8.RH8.01.13196	1117	9.25433	-82.1622	UCSD	UCSDMI	TRUE	FALSE	completed	UCSD	cyanobacteria	408172	Cyanobacteria	PAB
10125.1633.007H9.RH9.01.13197.mzXML	0	1633_007H9_RH9_01_13197.mzXML	TRUE	2006-04-03	marine metagenome	GAZ:Panama Bocas del Toro	1633_007H9_RH9_01_13197.mzXML	0	PAB3APR06.5 Black Lyngbya sp.	FALSE	0	ENVO:marine biome	ENVO:sea water	ENVO:organic material	Black Lyngbya sp.	F	TRUE	TRUE	Black Lyngbya sp.	cyanobacteria	1633.007H9.RH9.01.13197	1117	9.25433	-82.1622	UCSD	UCSDMI	TRUE	FALSE	completed	UCSD	cyanobacteria	408172	Cyanobacteria	PAB
10125.1634.007H11.2.RH11.01.13201.mzXML	0	1634_007H11_2_RH11_01_13201.mzXML	TRUE	2006-07-27	marine metagenome	GAZ:Panama Bocas del Toro	1634_007H11_2_RH11_01_13201.mzXML	0	PAB27JUL06.5 unknown	FALSE	0	ENVO:marine biome	ENVO:sea water	ENVO:organic material	other	Crude	TRUE	TRUE	other	other	1634.007H11.2.RH11.01.13201	408172	9.2892	-82.1716	UCSD	UCSDMI	TRUE	FALSE	completed	UCSD	cyanobacteria	408172	Cyanobacteria	PAB
10125.1634.008A1.GA1.01.13203.mzXML	0	1634_008A1_GA1_01_13203.mzXML	TRUE	2006-07-27	marine metagenome	GAZ:Panama Bocas del Toro	1634_008A1_GA1_01_13203.mzXML	0	PAB27JUL06.5 unknown	FALSE	0	ENVO:marine biome	ENVO:sea water	ENVO:organic material	other	A	TRUE	TRUE	other	other	1634.008A1.GA1.01.13203	408172	9.2892	-82.1716	UCSD	UCSDMI	TRUE	FALSE	completed	UCSD	cyanobacteria	408172	Cyanobacteria	PAB
10125.1634.008A2.GA2.01.13204.mzXML	0	1634_008A2_GA2_01_13204.mzXML	TRUE	2006-07-27	marine metagenome	GAZ:Panama Bocas del Toro	1634_008A2_GA2_01_13204.mzXML	0	PAB27JUL06.5 unknown	FALSE	0	ENVO:marine biome	ENVO:sea water	ENVO:organic material	other	B	TRUE	TRUE	other	other	1634.008A2.GA2.01.13204	408172	9.2892	-82.1716	UCSD	UCSDMI	TRUE	FALSE	completed	UCSD	cyanobacteria	408172	Cyanobacteria	PAB
10125.1634.008A3.GA3.01.13205.mzXML	0	1634_008A3_GA3_01_13205.mzXML	TRUE	2006-07-27	marine metagenome	GAZ:Panama Bocas del Toro	1634_008A3_GA3_01_13205.mzXML	0	PAB27JUL06.5 unknown	FALSE	0	ENVO:marine biome	ENVO:sea water	ENVO:organic material	other	C	TRUE	TRUE	other	other	1634.008A3.GA3.01.13205	408172	9.2892	-82.1716	UCSD	UCSDMI	TRUE	FALSE	completed	UCSD	cyanobacteria	408172	Cyanobacteria	PAB
10125.1634.008A4.GA4.01.13206.mzXML	0	1634_008A4_GA4_01_13206.mzXML	TRUE	2006-07-27	marine metagenome	GAZ:Panama Bocas del Toro	1634_008A4_GA4_01_13206.mzXML	0	PAB27JUL06.5 unknown	FALSE	0	ENVO:marine biome	ENVO:sea water	ENVO:organic material	other	D	TRUE	TRUE	other	other	1634.008A4.GA4.01.13206	408172	9.2892	-82.1716	UCSD	UCSDMI	TRUE	FALSE	completed	UCSD	cyanobacteria	408172	Cyanobacteria	PAB
10125.1634.008A5.GA5.01.13207.mzXML	0	1634_008A5_GA5_01_13207.mzXML	TRUE	2006-07-27	marine metagenome	GAZ:Panama Bocas del Toro	1634_008A5_GA5_01_13207.mzXML	0	PAB27JUL06.5 unknown	FALSE	0	ENVO:marine biome	ENVO:sea water	ENVO:organic material	other	E	TRUE	TRUE	other	other	1634.008A5.GA5.01.13207	408172	9.2892	-82.1716	UCSD	UCSDMI	TRUE	FALSE	completed	UCSD	cyanobacteria	408172	Cyanobacteria	PAB
10125.1634.008A6.GA6.01.13208.mzXML	0	1634_008A6_GA6_01_13208.mzXML	TRUE	2006-07-27	marine metagenome	GAZ:Panama Bocas del Toro	1634_008A6_GA6_01_13208.mzXML	0	PAB27JUL06.5 unknown	FALSE	0	ENVO:marine biome	ENVO:sea water	ENVO:organic material	other	I	TRUE	TRUE	other	other	1634.008A6.GA6.01.13208	408172	9.2892	-82.1716	UCSD	UCSDMI	TRUE	FALSE	completed	UCSD	cyanobacteria	408172	Cyanobacteria	PAB
10125.A2050.031C1.CRUDE.RC1.01.18774.mzXML	0	A2050_031C1_CRUDE_RC1_01_18774.mzXML	TRUE	2011-05-19	marine metagenome	GAZ:Panama Bocas del Toro	A2050_031C1_CRUDE_RC1_01_18774.mzXML	0	PAB19MAY11.2a Pink Buttons	FALSE	0	ENVO:marine biome	ENVO:sea water	ENVO:organic material	Pink Buttons	A	TRUE	TRUE	Pink Buttons	cyanobacteria	A2050.031C1.CRUDE.RC1.01.18774	408172	32.8427	-117.258	UCSD	UCSDMI	TRUE	FALSE	completed	UCSD	cyanobacteria	408172	Cyanobacteria	PAB
10125.A2050.031C10.I.RC10.01.18783.mzXML	0	A2050_031C10_I_RC10_01_18783.mzXML	TRUE	2011-05-19	marine metagenome	GAZ:Panama Bocas del Toro	A2050_031C10_I_RC10_01_18783.mzXML	0	PAB19MAY11.2a Pink Buttons	FALSE	0	ENVO:marine biome	ENVO:sea water	ENVO:organic material	Pink Buttons	crude	TRUE	TRUE	Pink Buttons	cyanobacteria	A2050.031C10.I.RC10.01.18783	408172	32.8427	-117.258	UCSD	UCSDMI	TRUE	FALSE	completed	UCSD	cyanobacteria	408172	Cyanobacteria	PAB
10125.A2050.031C2.A.RC2.01.18775.mzXML	0	A2050_031C2_A_RC2_01_18775.mzXML	TRUE	2011-05-19	marine metagenome	GAZ:Panama Bocas del Toro	A2050_031C2_A_RC2_01_18775.mzXML	0	PAB19MAY11.2a Pink Buttons	FALSE	0	ENVO:marine biome	ENVO:sea water	ENVO:organic material	Pink Buttons	B	TRUE	TRUE	Pink Buttons	cyanobacteria	A2050.031C2.A.RC2.01.18775	408172	32.8427	-117.258	UCSD	UCSDMI	TRUE	FALSE	completed	UCSD	cyanobacteria	408172	Cyanobacteria	PAB
10125.A2050.031C3.B.RC3.01.18776.mzXML	0	A2050_031C3_B_RC3_01_18776.mzXML	TRUE	2011-05-19	marine metagenome	GAZ:Panama Bocas del Toro	A2050_031C3_B_RC3_01_18776.mzXML	0	PAB19MAY11.2a Pink Buttons	FALSE	0	ENVO:marine biome	ENVO:sea water	ENVO:organic material	Pink Buttons	C	TRUE	TRUE	Pink Buttons	cyanobacteria	A2050.031C3.B.RC3.01.18776	408172	32.8427	-117.258	UCSD	UCSDMI	TRUE	FALSE	completed	UCSD	cyanobacteria	408172	Cyanobacteria	PAB
10125.A2050.031C4.C.RC4.01.18777.mzXML	0	A2050_031C4_C_RC4_01_18777.mzXML	TRUE	2011-05-19	marine metagenome	GAZ:Panama Bocas del Toro	A2050_031C4_C_RC4_01_18777.mzXML	0	PAB19MAY11.2a Pink Buttons	FALSE	0	ENVO:marine biome	ENVO:sea water	ENVO:organic material	Pink Buttons	D	TRUE	TRUE	Pink Buttons	cyanobacteria	A2050.031C4.C.RC4.01.18777	408172	32.8427	-117.258	UCSD	UCSDMI	TRUE	FALSE	completed	UCSD	cyanobacteria	408172	Cyanobacteria	PAB
10125.A2050.031C5.D.RC5.01.18778.mzXML	0	A2050_031C5_D_RC5_01_18778.mzXML	TRUE	2011-05-19	marine metagenome	GAZ:Panama Bocas del Toro	A2050_031C5_D_RC5_01_18778.mzXML	0	PAB19MAY11.2a Pink Buttons	FALSE	0	ENVO:marine biome	ENVO:sea water	ENVO:organic material	Pink Buttons	E	TRUE	TRUE	Pink Buttons	cyanobacteria	A2050.031C5.D.RC5.01.18778	408172	32.8427	-117.258	UCSD	UCSDMI	TRUE	FALSE	completed	UCSD	cyanobacteria	408172	Cyanobacteria	PAB
10125.A2050.031C6.E.RC6.01.18779.mzXML	0	A2050_031C6_E_RC6_01_18779.mzXML	TRUE	2011-05-19	marine metagenome	GAZ:Panama Bocas del Toro	A2050_031C6_E_RC6_01_18779.mzXML	0	PAB19MAY11.2a Pink Buttons	FALSE	0	ENVO:marine biome	ENVO:sea water	ENVO:organic material	Pink Buttons	F	TRUE	TRUE	Pink Buttons	cyanobacteria	A2050.031C6.E.RC6.01.18779	408172	32.8427	-117.258	UCSD	UCSDMI	TRUE	FALSE	completed	UCSD	cyanobacteria	408172	Cyanobacteria	PAB
10125.A2050.031C7.F.RC7.01.18780.mzXML	0	A2050_031C7_F_RC7_01_18780.mzXML	TRUE	2011-05-19	marine metagenome	GAZ:Panama Bocas del Toro	A2050_031C7_F_RC7_01_18780.mzXML	0	PAB19MAY11.2a Pink Buttons	FALSE	0	ENVO:marine biome	ENVO:sea water	ENVO:organic material	Pink Buttons	G	TRUE	TRUE	Pink Buttons	cyanobacteria	A2050.031C7.F.RC7.01.18780	408172	32.8427	-117.258	UCSD	UCSDMI	TRUE	FALSE	completed	UCSD	cyanobacteria	408172	Cyanobacteria	PAB
10125.A2050.031C8.G.RC8.01.18781.mzXML	0	A2050_031C8_G_RC8_01_18781.mzXML	TRUE	2011-05-19	marine metagenome	GAZ:Panama Bocas del Toro	A2050_031C8_G_RC8_01_18781.mzXML	0	PAB19MAY11.2a Pink Buttons	FALSE	0	ENVO:marine biome	ENVO:sea water	ENVO:organic material	Pink Buttons	H	TRUE	TRUE	Pink Buttons	cyanobacteria	A2050.031C8.G.RC8.01.18781	408172	32.8427	-117.258	UCSD	UCSDMI	TRUE	FALSE	completed	UCSD	cyanobacteria	408172	Cyanobacteria	PAB
10125.A2050.031C9.H.RC9.01.18782.mzXML	0	A2050_031C9_H_RC9_01_18782.mzXML	TRUE	2011-05-19	marine metagenome	GAZ:Panama Bocas del Toro	A2050_031C9_H_RC9_01_18782.mzXML	0	PAB19MAY11.2a Pink Buttons	FALSE	0	ENVO:marine biome	ENVO:sea water	ENVO:organic material	Pink Buttons	I	TRUE	TRUE	Pink Buttons	cyanobacteria	A2050.031C9.H.RC9.01.18782	408172	32.8427	-117.258	UCSD	UCSDMI	TRUE	FALSE	completed	UCSD	cyanobacteria	408172	Cyanobacteria	PAB
10125.1577.003E10.RE10.01.12752.mzXML	0	1577_003E10_RE10_01_12752.mzXML	TRUE	2006-03-13	marine metagenome	GAZ:Panama	1577_003E10_RE10_01_12752.mzXML	0	PAC13MAR06.D43 Shizothrix	FALSE	0	ENVO:marine biome	ENVO:sea water	ENVO:organic material	Shizothrix	E	TRUE	TRUE	Shizothrix	cyanobacteria	1577.003E10.RE10.01.12752	1117	7.64192	-81.7528	UCSD	UCSDMI	TRUE	FALSE	completed	UCSD	cyanobacteria	408172	Cyanobacteria	PAC
10125.1577.003E11.RE11.01.12753.mzXML	0	1577_003E11_RE11_01_12753.mzXML	TRUE	2006-03-13	marine metagenome	GAZ:Panama	1577_003E11_RE11_01_12753.mzXML	0	PAC13MAR06.D43 Shizothrix	FALSE	0	ENVO:marine biome	ENVO:sea water	ENVO:organic material	Shizothrix	F	TRUE	TRUE	Shizothrix	cyanobacteria	1577.003E11.RE11.01.12753	1117	7.64192	-81.7528	UCSD	UCSDMI	TRUE	FALSE	completed	UCSD	cyanobacteria	408172	Cyanobacteria	PAC
10125.1577.003E7.RE7.01.12749.mzXML	0	1577_003E7_RE7_01_12749.mzXML	TRUE	2006-03-13	marine metagenome	GAZ:Panama	1577_003E7_RE7_01_12749.mzXML	0	PAC13MAR06.D43 Shizothrix	FALSE	0	ENVO:marine biome	ENVO:sea water	ENVO:organic material	Shizothrix	A	TRUE	TRUE	Shizothrix	cyanobacteria	1577.003E7.RE7.01.12749	1117	7.64192	-81.7528	UCSD	UCSDMI	TRUE	FALSE	completed	UCSD	cyanobacteria	408172	Cyanobacteria	PAC
10125.1577.003E8.RE8.01.12750.mzXML	0	1577_003E8_RE8_01_12750.mzXML	TRUE	2006-03-13	marine metagenome	GAZ:Panama	1577_003E8_RE8_01_12750.mzXML	0	PAC13MAR06.D43 Shizothrix	FALSE	0	ENVO:marine biome	ENVO:sea water	ENVO:organic material	Shizothrix	C	TRUE	TRUE	Shizothrix	cyanobacteria	1577.003E8.RE8.01.12750	1117	7.64192	-81.7528	UCSD	UCSDMI	TRUE	FALSE	completed	UCSD	cyanobacteria	408172	Cyanobacteria	PAC
10125.1577.003E9.RE9.01.12751.mzXML	0	1577_003E9_RE9_01_12751.mzXML	TRUE	2006-03-13	marine metagenome	GAZ:Panama	1577_003E9_RE9_01_12751.mzXML	0	PAC13MAR06.D43 Shizothrix	FALSE	0	ENVO:marine biome	ENVO:sea water	ENVO:organic material	Shizothrix	D	TRUE	TRUE	Shizothrix	cyanobacteria	1577.003E9.RE9.01.12751	1117	7.64192	-81.7528	UCSD	UCSDMI	TRUE	FALSE	completed	UCSD	cyanobacteria	408172	Cyanobacteria	PAC
10125.1577.003F1.RF1.01.12754.mzXML	0	1577_003F1_RF1_01_12754.mzXML	TRUE	2006-03-13	marine metagenome	GAZ:Panama	1577_003F1_RF1_01_12754.mzXML	0	PAC13MAR06.D43 Shizothrix	FALSE	0	ENVO:marine biome	ENVO:sea water	ENVO:organic material	Shizothrix	G	TRUE	TRUE	Shizothrix	cyanobacteria	1577.003F1.RF1.01.12754	1117	7.64192	-81.7528	UCSD	UCSDMI	TRUE	FALSE	completed	UCSD	cyanobacteria	408172	Cyanobacteria	PAC
10125.1577.003F2.RF2.01.12755.mzXML	0	1577_003F2_RF2_01_12755.mzXML	TRUE	2006-03-13	marine metagenome	GAZ:Panama	1577_003F2_RF2_01_12755.mzXML	0	PAC13MAR06.D43 Shizothrix	FALSE	0	ENVO:marine biome	ENVO:sea water	ENVO:organic material	Shizothrix	H	TRUE	TRUE	Shizothrix	cyanobacteria	1577.003F2.RF2.01.12755	1117	7.64192	-81.7528	UCSD	UCSDMI	TRUE	FALSE	completed	UCSD	cyanobacteria	408172	Cyanobacteria	PAC
10125.1577.003F3.RF3.01.12756.mzXML	0	1577_003F3_RF3_01_12756.mzXML	TRUE	2006-03-13	marine metagenome	GAZ:Panama	1577_003F3_RF3_01_12756.mzXML	0	PAC13MAR06.D43 Shizothrix	FALSE	0	ENVO:marine biome	ENVO:sea water	ENVO:organic material	Shizothrix	I	TRUE	TRUE	Shizothrix	cyanobacteria	1577.003F3.RF3.01.12756	1117	7.64192	-81.7528	UCSD	UCSDMI	TRUE	FALSE	completed	UCSD	cyanobacteria	408172	Cyanobacteria	PAC
10125.1580.003G11.RG11.01.12779.mzXML	0	1580_003G11_RG11_01_12779.mzXML	TRUE	2006-03-08	marine metagenome	GAZ:Panama	1580_003G11_RG11_01_12779.mzXML	0	PAC8MAR06.S11 Symploca probablesp.	FALSE	0	ENVO:marine biome	ENVO:sea water	ENVO:organic material	Symploca probablesp.	A	TRUE	TRUE	Symploca probablesp.	cyanobacteria	1580.003G11.RG11.01.12779	1117	7.39492	-81.6985	UCSD	UCSDMI	TRUE	FALSE	completed	UCSD	cyanobacteria	408172	Cyanobacteria	PAC
10125.1580.003H1.RH1.01.12782.mzXML	0	1580_003H1_RH1_01_12782.mzXML	TRUE	2006-03-08	marine metagenome	GAZ:Panama	1580_003H1_RH1_01_12782.mzXML	0	PAC8MAR06.S11 Symploca probablesp.	FALSE	0	ENVO:marine biome	ENVO:sea water	ENVO:organic material	Symploca probablesp.	B	TRUE	TRUE	Symploca probablesp.	cyanobacteria	1580.003H1.RH1.01.12782	1117	7.39492	-81.6985	UCSD	UCSDMI	TRUE	FALSE	completed	UCSD	cyanobacteria	408172	Cyanobacteria	PAC
10125.1580.003H2.RH2.01.12783.mzXML	0	1580_003H2_RH2_01_12783.mzXML	TRUE	2006-03-08	marine metagenome	GAZ:Panama	1580_003H2_RH2_01_12783.mzXML	0	PAC8MAR06.S11 Symploca probablesp.	FALSE	0	ENVO:marine biome	ENVO:sea water	ENVO:organic material	Symploca probablesp.	C	TRUE	TRUE	Symploca probablesp.	cyanobacteria	1580.003H2.RH2.01.12783	1117	7.39492	-81.6985	UCSD	UCSDMI	TRUE	FALSE	completed	UCSD	cyanobacteria	408172	Cyanobacteria	PAC
10125.1580.003H3.RH3.01.12784.mzXML	0	1580_003H3_RH3_01_12784.mzXML	TRUE	2006-03-08	marine metagenome	GAZ:Panama	1580_003H3_RH3_01_12784.mzXML	0	PAC8MAR06.S11 Symploca probablesp.	FALSE	0	ENVO:marine biome	ENVO:sea water	ENVO:organic material	Symploca probablesp.	D	TRUE	TRUE	Symploca probablesp.	cyanobacteria	1580.003H3.RH3.01.12784	1117	7.39492	-81.6985	UCSD	UCSDMI	TRUE	FALSE	completed	UCSD	cyanobacteria	408172	Cyanobacteria	PAC
10125.1580.003H4.RH4.01.12785.mzXML	0	1580_003H4_RH4_01_12785.mzXML	TRUE	2006-03-08	marine metagenome	GAZ:Panama	1580_003H4_RH4_01_12785.mzXML	0	PAC8MAR06.S11 Symploca probablesp.	FALSE	0	ENVO:marine biome	ENVO:sea water	ENVO:organic material	Symploca probablesp.	E	TRUE	TRUE	Symploca probablesp.	cyanobacteria	1580.003H4.RH4.01.12785	1117	7.39492	-81.6985	UCSD	UCSDMI	TRUE	FALSE	completed	UCSD	cyanobacteria	408172	Cyanobacteria	PAC
10125.1580.003H5.RH5.01.12786.mzXML	0	1580_003H5_RH5_01_12786.mzXML	TRUE	2006-03-08	marine metagenome	GAZ:Panama	1580_003H5_RH5_01_12786.mzXML	0	PAC8MAR06.S11 Symploca probablesp.	FALSE	0	ENVO:marine biome	ENVO:sea water	ENVO:organic material	Symploca probablesp.	F	TRUE	TRUE	Symploca probablesp.	cyanobacteria	1580.003H5.RH5.01.12786	1117	7.39492	-81.6985	UCSD	UCSDMI	TRUE	FALSE	completed	UCSD	cyanobacteria	408172	Cyanobacteria	PAC
10125.1580.003H6.RH6.01.12787.mzXML	0	1580_003H6_RH6_01_12787.mzXML	TRUE	2006-03-08	marine metagenome	GAZ:Panama	1580_003H6_RH6_01_12787.mzXML	0	PAC8MAR06.S11 Symploca probablesp.	FALSE	0	ENVO:marine biome	ENVO:sea water	ENVO:organic material	Symploca probablesp.	G	TRUE	TRUE	Symploca probablesp.	cyanobacteria	1580.003H6.RH6.01.12787	1117	7.39492	-81.6985	UCSD	UCSDMI	TRUE	FALSE	completed	UCSD	cyanobacteria	408172	Cyanobacteria	PAC
10125.1580.003H7.RH7.01.12788.mzXML	0	1580_003H7_RH7_01_12788.mzXML	TRUE	2006-03-08	marine metagenome	GAZ:Panama	1580_003H7_RH7_01_12788.mzXML	0	PAC8MAR06.S11 Symploca probablesp.	FALSE	0	ENVO:marine biome	ENVO:sea water	ENVO:organic material	Symploca probablesp.	H	TRUE	TRUE	Symploca probablesp.	cyanobacteria	1580.003H7.RH7.01.12788	1117	7.39492	-81.6985	UCSD	UCSDMI	TRUE	FALSE	completed	UCSD	cyanobacteria	408172	Cyanobacteria	PAC
10125.1580.003H8.2.RH8.01.12790.mzXML	0	1580_003H8_2_RH8_01_12790.mzXML	TRUE	2006-03-08	marine metagenome	GAZ:Panama	1580_003H8_2_RH8_01_12790.mzXML	0	PAC8MAR06.S11 Symploca probablesp.	FALSE	0	ENVO:marine biome	ENVO:sea water	ENVO:organic material	Symploca probablesp.	I	TRUE	TRUE	Symploca probablesp.	cyanobacteria	1580.003H8.2.RH8.01.12790	1117	7.39492	-81.6985	UCSD	UCSDMI	TRUE	FALSE	completed	UCSD	cyanobacteria	408172	Cyanobacteria	PAC
10125.1591.004H2.GH2.01.12888.mzXML	0	1591_004H2_GH2_01_12888.mzXML	TRUE	2006-03-10	marine metagenome	GAZ:Panama	1591_004H2_GH2_01_12888.mzXML	0	PAC10MAR06.S14 Leptolyngbya	FALSE	0	ENVO:marine biome	ENVO:sea water	ENVO:organic material	Leptolyngbya	Crude	TRUE	TRUE	Leptolyngbya	cyanobacteria	1591.004H2.GH2.01.12888	1117	7.39403	-81.6713	UCSD	UCSDMI	TRUE	FALSE	completed	UCSD	cyanobacteria	408172	Cyanobacteria	PAC
10125.1591.004H4.GH4.01.12890.mzXML	0	1591_004H4_GH4_01_12890.mzXML	TRUE	2006-03-10	marine metagenome	GAZ:Panama	1591_004H4_GH4_01_12890.mzXML	0	PAC10MAR06.S14 Leptolyngbya	FALSE	0	ENVO:marine biome	ENVO:sea water	ENVO:organic material	Leptolyngbya	B	TRUE	TRUE	Leptolyngbya	cyanobacteria	1591.004H4.GH4.01.12890	1117	7.39403	-81.6713	UCSD	UCSDMI	TRUE	FALSE	completed	UCSD	cyanobacteria	408172	Cyanobacteria	PAC
10125.1591.004H5.GH5.01.12891.mzXML	0	1591_004H5_GH5_01_12891.mzXML	TRUE	2006-03-10	marine metagenome	GAZ:Panama	1591_004H5_GH5_01_12891.mzXML	0	PAC10MAR06.S14 Leptolyngbya	FALSE	0	ENVO:marine biome	ENVO:sea water	ENVO:organic material	Leptolyngbya	C	TRUE	TRUE	Leptolyngbya	cyanobacteria	1591.004H5.GH5.01.12891	1117	7.39403	-81.6713	UCSD	UCSDMI	TRUE	FALSE	completed	UCSD	cyanobacteria	408172	Cyanobacteria	PAC
10125.1591.004H6.GH6.01.12892.mzXML	0	1591_004H6_GH6_01_12892.mzXML	TRUE	2006-03-10	marine metagenome	GAZ:Panama	1591_004H6_GH6_01_12892.mzXML	0	PAC10MAR06.S14 Leptolyngbya	FALSE	0	ENVO:marine biome	ENVO:sea water	ENVO:organic material	Leptolyngbya	D	TRUE	TRUE	Leptolyngbya	cyanobacteria	1591.004H6.GH6.01.12892	1117	7.39403	-81.6713	UCSD	UCSDMI	TRUE	FALSE	completed	UCSD	cyanobacteria	408172	Cyanobacteria	PAC
10125.1591.004H7.GH7.01.12893.mzXML	0	1591_004H7_GH7_01_12893.mzXML	TRUE	2006-03-10	marine metagenome	GAZ:Panama	1591_004H7_GH7_01_12893.mzXML	0	PAC10MAR06.S14 Leptolyngbya	FALSE	0	ENVO:marine biome	ENVO:sea water	ENVO:organic material	Leptolyngbya	E	TRUE	TRUE	Leptolyngbya	cyanobacteria	1591.004H7.GH7.01.12893	1117	7.39403	-81.6713	UCSD	UCSDMI	TRUE	FALSE	completed	UCSD	cyanobacteria	408172	Cyanobacteria	PAC
10125.1591.004H8.GH8.01.12894.mzXML	0	1591_004H8_GH8_01_12894.mzXML	TRUE	2006-03-10	marine metagenome	GAZ:Panama	1591_004H8_GH8_01_12894.mzXML	0	PAC10MAR06.S14 Leptolyngbya	FALSE	0	ENVO:marine biome	ENVO:sea water	ENVO:organic material	Leptolyngbya	H	TRUE	TRUE	Leptolyngbya	cyanobacteria	1591.004H8.GH8.01.12894	1117	7.39403	-81.6713	UCSD	UCSDMI	TRUE	FALSE	completed	UCSD	cyanobacteria	408172	Cyanobacteria	PAC
10125.1591.004H9.GH9.01.12895.mzXML	0	1591_004H9_GH9_01_12895.mzXML	TRUE	2006-03-10	marine metagenome	GAZ:Panama	1591_004H9_GH9_01_12895.mzXML	0	PAC10MAR06.S14 Leptolyngbya	FALSE	0	ENVO:marine biome	ENVO:sea water	ENVO:organic material	Leptolyngbya	I	TRUE	TRUE	Leptolyngbya	cyanobacteria	1591.004H9.GH9.01.12895	1117	7.39403	-81.6713	UCSD	UCSDMI	TRUE	FALSE	completed	UCSD	cyanobacteria	408172	Cyanobacteria	PAC
10125.1592.004H10.GH10.01.12897.mzXML	0	1592_004H10_GH10_01_12897.mzXML	TRUE	2006-03-08	marine metagenome	GAZ:Panama	1592_004H10_GH10_01_12897.mzXML	0	PAC8MAR06.S1 Cyanobacteria sp.	FALSE	0	ENVO:marine biome	ENVO:sea water	ENVO:organic material	Cyanobacteria sp.	Crude	TRUE	TRUE	Cyanobacteria sp.	cyanobacteria	1592.004H10.GH10.01.12897	1117	7.633	-81.6985	UCSD	UCSDMI	TRUE	FALSE	completed	UCSD	cyanobacteria	408172	Cyanobacteria	PAC
10125.1592.004H11.GH11.01.12898.mzXML	0	1592_004H11_GH11_01_12898.mzXML	TRUE	2006-03-08	marine metagenome	GAZ:Panama	1592_004H11_GH11_01_12898.mzXML	0	PAC8MAR06.S1 Cyanobacteria sp.	FALSE	0	ENVO:marine biome	ENVO:sea water	ENVO:organic material	Cyanobacteria sp.	A	TRUE	TRUE	Cyanobacteria sp.	cyanobacteria	1592.004H11.GH11.01.12898	1117	7.633	-81.6985	UCSD	UCSDMI	TRUE	FALSE	completed	UCSD	cyanobacteria	408172	Cyanobacteria	PAC
10125.1592.005A1.RA1.01.12899.mzXML	0	1592_005A1_RA1_01_12899.mzXML	TRUE	2006-03-08	marine metagenome	GAZ:Panama	1592_005A1_RA1_01_12899.mzXML	0	PAC8MAR06.S1 Cyanobacteria sp.	FALSE	0	ENVO:marine biome	ENVO:sea water	ENVO:organic material	Cyanobacteria sp.	B	TRUE	TRUE	Cyanobacteria sp.	cyanobacteria	1592.005A1.RA1.01.12899	1117	7.633	-81.6985	UCSD	UCSDMI	TRUE	FALSE	completed	UCSD	cyanobacteria	408172	Cyanobacteria	PAC
10125.1592.005A2.RA2.01.12900.mzXML	0	1592_005A2_RA2_01_12900.mzXML	TRUE	2006-03-08	marine metagenome	GAZ:Panama	1592_005A2_RA2_01_12900.mzXML	0	PAC8MAR06.S1 Cyanobacteria sp.	FALSE	0	ENVO:marine biome	ENVO:sea water	ENVO:organic material	Cyanobacteria sp.	C	TRUE	TRUE	Cyanobacteria sp.	cyanobacteria	1592.005A2.RA2.01.12900	1117	7.633	-81.6985	UCSD	UCSDMI	TRUE	FALSE	completed	UCSD	cyanobacteria	408172	Cyanobacteria	PAC
10125.1592.005A3.RA3.01.12901.mzXML	0	1592_005A3_RA3_01_12901.mzXML	TRUE	2006-03-08	marine metagenome	GAZ:Panama	1592_005A3_RA3_01_12901.mzXML	0	PAC8MAR06.S1 Cyanobacteria sp.	FALSE	0	ENVO:marine biome	ENVO:sea water	ENVO:organic material	Cyanobacteria sp.	D	TRUE	TRUE	Cyanobacteria sp.	cyanobacteria	1592.005A3.RA3.01.12901	1117	7.633	-81.6985	UCSD	UCSDMI	TRUE	FALSE	completed	UCSD	cyanobacteria	408172	Cyanobacteria	PAC
10125.1592.005A4.RA4.01.12902.mzXML	0	1592_005A4_RA4_01_12902.mzXML	TRUE	2006-03-08	marine metagenome	GAZ:Panama	1592_005A4_RA4_01_12902.mzXML	0	PAC8MAR06.S1 Cyanobacteria sp.	FALSE	0	ENVO:marine biome	ENVO:sea water	ENVO:organic material	Cyanobacteria sp.	E	TRUE	TRUE	Cyanobacteria sp.	cyanobacteria	1592.005A4.RA4.01.12902	1117	7.633	-81.6985	UCSD	UCSDMI	TRUE	FALSE	completed	UCSD	cyanobacteria	408172	Cyanobacteria	PAC
10125.1592.005A5.RA5.01.12903.mzXML	0	1592_005A5_RA5_01_12903.mzXML	TRUE	2006-03-08	marine metagenome	GAZ:Panama	1592_005A5_RA5_01_12903.mzXML	0	PAC8MAR06.S1 Cyanobacteria sp.	FALSE	0	ENVO:marine biome	ENVO:sea water	ENVO:organic material	Cyanobacteria sp.	F	TRUE	TRUE	Cyanobacteria sp.	cyanobacteria	1592.005A5.RA5.01.12903	1117	7.633	-81.6985	UCSD	UCSDMI	TRUE	FALSE	completed	UCSD	cyanobacteria	408172	Cyanobacteria	PAC
10125.1592.005A6.RA6.01.12904.mzXML	0	1592_005A6_RA6_01_12904.mzXML	TRUE	2006-03-08	marine metagenome	GAZ:Panama	1592_005A6_RA6_01_12904.mzXML	0	PAC8MAR06.S1 Cyanobacteria sp.	FALSE	0	ENVO:marine biome	ENVO:sea water	ENVO:organic material	Cyanobacteria sp.	G	TRUE	TRUE	Cyanobacteria sp.	cyanobacteria	1592.005A6.RA6.01.12904	1117	7.633	-81.6985	UCSD	UCSDMI	TRUE	FALSE	completed	UCSD	cyanobacteria	408172	Cyanobacteria	PAC
10125.1592.005A7.RA7.01.12905.mzXML	0	1592_005A7_RA7_01_12905.mzXML	TRUE	2006-03-08	marine metagenome	GAZ:Panama	1592_005A7_RA7_01_12905.mzXML	0	PAC8MAR06.S1 Cyanobacteria sp.	FALSE	0	ENVO:marine biome	ENVO:sea water	ENVO:organic material	Cyanobacteria sp.	H	TRUE	TRUE	Cyanobacteria sp.	cyanobacteria	1592.005A7.RA7.01.12905	1117	7.633	-81.6985	UCSD	UCSDMI	TRUE	FALSE	completed	UCSD	cyanobacteria	408172	Cyanobacteria	PAC
10125.1592.005A8.RA8.01.12906.mzXML	0	1592_005A8_RA8_01_12906.mzXML	TRUE	2006-03-08	marine metagenome	GAZ:Panama	1592_005A8_RA8_01_12906.mzXML	0	PAC8MAR06.S1 Cyanobacteria sp.	FALSE	0	ENVO:marine biome	ENVO:sea water	ENVO:organic material	Cyanobacteria sp.	I	TRUE	TRUE	Cyanobacteria sp.	cyanobacteria	1592.005A8.RA8.01.12906	1117	7.633	-81.6985	UCSD	UCSDMI	TRUE	FALSE	completed	UCSD	cyanobacteria	408172	Cyanobacteria	PAC
10125.1593.005A10.RA10.01.12909.mzXML	0	1593_005A10_RA10_01_12909.mzXML	TRUE	2006-08-11	marine metagenome	GAZ:Panama	1593_005A10_RA10_01_12909.mzXML	0	PAC11AUG06 Shizothrix	FALSE	0	ENVO:marine biome	ENVO:sea water	ENVO:organic material	Shizothrix	A	TRUE	TRUE	Shizothrix	cyanobacteria	1593.005A10.RA10.01.12909	1117	32.8427	-117.258	UCSD	UCSDMI	TRUE	FALSE	completed	UCSD	cyanobacteria	408172	Cyanobacteria	PAC
10125.1593.005A11.RA11.01.12910.mzXML	0	1593_005A11_RA11_01_12910.mzXML	TRUE	2006-08-11	marine metagenome	GAZ:Panama	1593_005A11_RA11_01_12910.mzXML	0	PAC11AUG06 Shizothrix	FALSE	0	ENVO:marine biome	ENVO:sea water	ENVO:organic material	Shizothrix	D	TRUE	TRUE	Shizothrix	cyanobacteria	1593.005A11.RA11.01.12910	1117	32.8427	-117.258	UCSD	UCSDMI	TRUE	FALSE	completed	UCSD	cyanobacteria	408172	Cyanobacteria	PAC
10125.1593.005A9.RA9.01.12908.mzXML	0	1593_005A9_RA9_01_12908.mzXML	TRUE	2006-08-11	marine metagenome	GAZ:Panama	1593_005A9_RA9_01_12908.mzXML	0	PAC11AUG06 Shizothrix	FALSE	0	ENVO:marine biome	ENVO:sea water	ENVO:organic material	Shizothrix	Crude	TRUE	TRUE	Shizothrix	cyanobacteria	1593.005A9.RA9.01.12908	1117	32.8427	-117.258	UCSD	UCSDMI	TRUE	FALSE	completed	UCSD	cyanobacteria	408172	Cyanobacteria	PAC
10125.1593.005B1.RB1.01.12911.mzXML	0	1593_005B1_RB1_01_12911.mzXML	TRUE	2006-08-11	marine metagenome	GAZ:Panama	1593_005B1_RB1_01_12911.mzXML	0	PAC11AUG06 Shizothrix	FALSE	0	ENVO:marine biome	ENVO:sea water	ENVO:organic material	Shizothrix	E	TRUE	TRUE	Shizothrix	cyanobacteria	1593.005B1.RB1.01.12911	1117	32.8427	-117.258	UCSD	UCSDMI	TRUE	FALSE	completed	UCSD	cyanobacteria	408172	Cyanobacteria	PAC
10125.1593.005B2.RB2.01.12912.mzXML	0	1593_005B2_RB2_01_12912.mzXML	TRUE	2006-08-11	marine metagenome	GAZ:Panama	1593_005B2_RB2_01_12912.mzXML	0	PAC11AUG06 Shizothrix	FALSE	0	ENVO:marine biome	ENVO:sea water	ENVO:organic material	Shizothrix	F	TRUE	TRUE	Shizothrix	cyanobacteria	1593.005B2.RB2.01.12912	1117	32.8427	-117.258	UCSD	UCSDMI	TRUE	FALSE	completed	UCSD	cyanobacteria	408172	Cyanobacteria	PAC
10125.1593.005B3.RB3.01.12913.mzXML	0	1593_005B3_RB3_01_12913.mzXML	TRUE	2006-08-11	marine metagenome	GAZ:Panama	1593_005B3_RB3_01_12913.mzXML	0	PAC11AUG06 Shizothrix	FALSE	0	ENVO:marine biome	ENVO:sea water	ENVO:organic material	Shizothrix	G	TRUE	TRUE	Shizothrix	cyanobacteria	1593.005B3.RB3.01.12913	1117	32.8427	-117.258	UCSD	UCSDMI	TRUE	FALSE	completed	UCSD	cyanobacteria	408172	Cyanobacteria	PAC
10125.1593.005B4.RB4.01.12914.mzXML	0	1593_005B4_RB4_01_12914.mzXML	TRUE	2006-08-11	marine metagenome	GAZ:Panama	1593_005B4_RB4_01_12914.mzXML	0	PAC11AUG06 Shizothrix	FALSE	0	ENVO:marine biome	ENVO:sea water	ENVO:organic material	Shizothrix	H	TRUE	TRUE	Shizothrix	cyanobacteria	1593.005B4.RB4.01.12914	1117	32.8427	-117.258	UCSD	UCSDMI	TRUE	FALSE	completed	UCSD	cyanobacteria	408172	Cyanobacteria	PAC
10125.1593.005B5.RB5.01.12915.mzXML	0	1593_005B5_RB5_01_12915.mzXML	TRUE	2006-08-11	marine metagenome	GAZ:Panama	1593_005B5_RB5_01_12915.mzXML	0	PAC11AUG06 Shizothrix	FALSE	0	ENVO:marine biome	ENVO:sea water	ENVO:organic material	Shizothrix	I	TRUE	TRUE	Shizothrix	cyanobacteria	1593.005B5.RB5.01.12915	1117	32.8427	-117.258	UCSD	UCSDMI	TRUE	FALSE	completed	UCSD	cyanobacteria	408172	Cyanobacteria	PAC
10125.1595.005C10.RC10.01.12933.mzXML	0	1595_005C10_RC10_01_12933.mzXML	TRUE	2006-03-14	marine metagenome	GAZ:Panama	1595_005C10_RC10_01_12933.mzXML	0	PAC14MAR06.S27 Cyanobacteria sp 30	FALSE	0	ENVO:marine biome	ENVO:sea water	ENVO:organic material	Cyanobacteria sp 3unknown	F	TRUE	TRUE	Cyanobacteria sp 3unknown	cyanobacteria	1595.005C10.RC10.01.12933	1117	7.39492	-81.651	UCSD	UCSDMI	TRUE	FALSE	completed	UCSD	cyanobacteria	408172	Cyanobacteria	PAC
10125.1595.005C11.RC11.01.12934.mzXML	0	1595_005C11_RC11_01_12934.mzXML	TRUE	2006-03-14	marine metagenome	GAZ:Panama	1595_005C11_RC11_01_12934.mzXML	0	PAC14MAR06.S27 Cyanobacteria sp 30	FALSE	0	ENVO:marine biome	ENVO:sea water	ENVO:organic material	Cyanobacteria sp 3unknown	G	TRUE	TRUE	Cyanobacteria sp 3unknown	cyanobacteria	1595.005C11.RC11.01.12934	1117	7.39492	-81.651	UCSD	UCSDMI	TRUE	FALSE	completed	UCSD	cyanobacteria	408172	Cyanobacteria	PAC
10125.1595.005C4.RC4.01.12927.mzXML	0	1595_005C4_RC4_01_12927.mzXML	TRUE	2006-03-14	marine metagenome	GAZ:Panama	1595_005C4_RC4_01_12927.mzXML	0	PAC14MAR06.S27 Cyanobacteria sp 30	FALSE	0	ENVO:marine biome	ENVO:sea water	ENVO:organic material	Cyanobacteria sp 3unknown	Crude	TRUE	TRUE	Cyanobacteria sp 3unknown	cyanobacteria	1595.005C4.RC4.01.12927	1117	7.39492	-81.651	UCSD	UCSDMI	TRUE	FALSE	completed	UCSD	cyanobacteria	408172	Cyanobacteria	PAC
10125.1595.005C5.RC5.01.12928.mzXML	0	1595_005C5_RC5_01_12928.mzXML	TRUE	2006-03-14	marine metagenome	GAZ:Panama	1595_005C5_RC5_01_12928.mzXML	0	PAC14MAR06.S27 Cyanobacteria sp 30	FALSE	0	ENVO:marine biome	ENVO:sea water	ENVO:organic material	Cyanobacteria sp 3unknown	A	TRUE	TRUE	Cyanobacteria sp 3unknown	cyanobacteria	1595.005C5.RC5.01.12928	1117	7.39492	-81.651	UCSD	UCSDMI	TRUE	FALSE	completed	UCSD	cyanobacteria	408172	Cyanobacteria	PAC
10125.1595.005C6.RC6.01.12929.mzXML	0	1595_005C6_RC6_01_12929.mzXML	TRUE	2006-03-14	marine metagenome	GAZ:Panama	1595_005C6_RC6_01_12929.mzXML	0	PAC14MAR06.S27 Cyanobacteria sp 30	FALSE	0	ENVO:marine biome	ENVO:sea water	ENVO:organic material	Cyanobacteria sp 3unknown	B	TRUE	TRUE	Cyanobacteria sp 3unknown	cyanobacteria	1595.005C6.RC6.01.12929	1117	7.39492	-81.651	UCSD	UCSDMI	TRUE	FALSE	completed	UCSD	cyanobacteria	408172	Cyanobacteria	PAC
10125.1595.005C7.RC7.01.12930.mzXML	0	1595_005C7_RC7_01_12930.mzXML	TRUE	2006-03-14	marine metagenome	GAZ:Panama	1595_005C7_RC7_01_12930.mzXML	0	PAC14MAR06.S27 Cyanobacteria sp 30	FALSE	0	ENVO:marine biome	ENVO:sea water	ENVO:organic material	Cyanobacteria sp 3unknown	C	TRUE	TRUE	Cyanobacteria sp 3unknown	cyanobacteria	1595.005C7.RC7.01.12930	1117	7.39492	-81.651	UCSD	UCSDMI	TRUE	FALSE	completed	UCSD	cyanobacteria	408172	Cyanobacteria	PAC
10125.1595.005C8.RC8.01.12931.mzXML	0	1595_005C8_RC8_01_12931.mzXML	TRUE	2006-03-14	marine metagenome	GAZ:Panama	1595_005C8_RC8_01_12931.mzXML	0	PAC14MAR06.S27 Cyanobacteria sp 30	FALSE	0	ENVO:marine biome	ENVO:sea water	ENVO:organic material	Cyanobacteria sp 3unknown	D	TRUE	TRUE	Cyanobacteria sp 3unknown	cyanobacteria	1595.005C8.RC8.01.12931	1117	7.39492	-81.651	UCSD	UCSDMI	TRUE	FALSE	completed	UCSD	cyanobacteria	408172	Cyanobacteria	PAC
10125.1595.005C9.RC9.01.12932.mzXML	0	1595_005C9_RC9_01_12932.mzXML	TRUE	2006-03-14	marine metagenome	GAZ:Panama	1595_005C9_RC9_01_12932.mzXML	0	PAC14MAR06.S27 Cyanobacteria sp 30	FALSE	0	ENVO:marine biome	ENVO:sea water	ENVO:organic material	Cyanobacteria sp 3unknown	E	TRUE	TRUE	Cyanobacteria sp 3unknown	cyanobacteria	1595.005C9.RC9.01.12932	1117	7.39492	-81.651	UCSD	UCSDMI	TRUE	FALSE	completed	UCSD	cyanobacteria	408172	Cyanobacteria	PAC
10125.1595.005D1.RD1.01.12938.mzXML	0	1595_005D1_RD1_01_12938.mzXML	TRUE	2006-03-14	marine metagenome	GAZ:Panama	1595_005D1_RD1_01_12938.mzXML	0	PAC14MAR06.S27 Cyanobacteria sp 30	FALSE	0	ENVO:marine biome	ENVO:sea water	ENVO:organic material	Cyanobacteria sp 3unknown	H	TRUE	TRUE	Cyanobacteria sp 3unknown	cyanobacteria	1595.005D1.RD1.01.12938	1117	7.39492	-81.651	UCSD	UCSDMI	TRUE	FALSE	completed	UCSD	cyanobacteria	408172	Cyanobacteria	PAC
10125.1595.005D2.RD2.01.12939.mzXML	0	1595_005D2_RD2_01_12939.mzXML	TRUE	2006-03-14	marine metagenome	GAZ:Panama	1595_005D2_RD2_01_12939.mzXML	0	PAC14MAR06.S27 Cyanobacteria sp 30	FALSE	0	ENVO:marine biome	ENVO:sea water	ENVO:organic material	Cyanobacteria sp 3unknown	I	TRUE	TRUE	Cyanobacteria sp 3unknown	cyanobacteria	1595.005D2.RD2.01.12939	1117	7.39492	-81.651	UCSD	UCSDMI	TRUE	FALSE	completed	UCSD	cyanobacteria	408172	Cyanobacteria	PAC
10125.1599.005E10.RE10.01.12961.mzXML	0	1599_005E10_RE10_01_12961.mzXML	TRUE	2006-03-12	marine metagenome	GAZ:Panama	1599_005E10_RE10_01_12961.mzXML	0	PAC12MAR06.D38 Leptolyngbya	FALSE	0	ENVO:marine biome	ENVO:sea water	ENVO:organic material	Leptolyngbya	B	TRUE	TRUE	Leptolyngbya	cyanobacteria	1599.005E10.RE10.01.12961	1117	7.39403	-81.6713	UCSD	UCSDMI	TRUE	FALSE	completed	UCSD	cyanobacteria	408172	Cyanobacteria	PAC
10125.1599.005E11.RE11.01.12962.mzXML	0	1599_005E11_RE11_01_12962.mzXML	TRUE	2006-03-12	marine metagenome	GAZ:Panama	1599_005E11_RE11_01_12962.mzXML	0	PAC12MAR06.D38 Leptolyngbya	FALSE	0	ENVO:marine biome	ENVO:sea water	ENVO:organic material	Leptolyngbya	C	TRUE	TRUE	Leptolyngbya	cyanobacteria	1599.005E11.RE11.01.12962	1117	7.39403	-81.6713	UCSD	UCSDMI	TRUE	FALSE	completed	UCSD	cyanobacteria	408172	Cyanobacteria	PAC
10125.1599.005E8.RE8.01.12959.mzXML	0	1599_005E8_RE8_01_12959.mzXML	TRUE	2006-03-12	marine metagenome	GAZ:Panama	1599_005E8_RE8_01_12959.mzXML	0	PAC12MAR06.D38 Leptolyngbya	FALSE	0	ENVO:marine biome	ENVO:sea water	ENVO:organic material	Leptolyngbya	Crude	TRUE	TRUE	Leptolyngbya	cyanobacteria	1599.005E8.RE8.01.12959	1117	7.39403	-81.6713	UCSD	UCSDMI	TRUE	FALSE	completed	UCSD	cyanobacteria	408172	Cyanobacteria	PAC
10125.1599.005E9.RE9.01.12960.mzXML	0	1599_005E9_RE9_01_12960.mzXML	TRUE	2006-03-12	marine metagenome	GAZ:Panama	1599_005E9_RE9_01_12960.mzXML	0	PAC12MAR06.D38 Leptolyngbya	FALSE	0	ENVO:marine biome	ENVO:sea water	ENVO:organic material	Leptolyngbya	A	TRUE	TRUE	Leptolyngbya	cyanobacteria	1599.005E9.RE9.01.12960	1117	7.39403	-81.6713	UCSD	UCSDMI	TRUE	FALSE	completed	UCSD	cyanobacteria	408172	Cyanobacteria	PAC
10125.1599.005F1.RF1.01.12963.mzXML	0	1599_005F1_RF1_01_12963.mzXML	TRUE	2006-03-12	marine metagenome	GAZ:Panama	1599_005F1_RF1_01_12963.mzXML	0	PAC12MAR06.D38 Leptolyngbya	FALSE	0	ENVO:marine biome	ENVO:sea water	ENVO:organic material	Leptolyngbya	D	TRUE	TRUE	Leptolyngbya	cyanobacteria	1599.005F1.RF1.01.12963	1117	7.39403	-81.6713	UCSD	UCSDMI	TRUE	FALSE	completed	UCSD	cyanobacteria	408172	Cyanobacteria	PAC
10125.1599.005F2.RF2.01.12964.mzXML	0	1599_005F2_RF2_01_12964.mzXML	TRUE	2006-03-12	marine metagenome	GAZ:Panama	1599_005F2_RF2_01_12964.mzXML	0	PAC12MAR06.D38 Leptolyngbya	FALSE	0	ENVO:marine biome	ENVO:sea water	ENVO:organic material	Leptolyngbya	E	TRUE	TRUE	Leptolyngbya	cyanobacteria	1599.005F2.RF2.01.12964	1117	7.39403	-81.6713	UCSD	UCSDMI	TRUE	FALSE	completed	UCSD	cyanobacteria	408172	Cyanobacteria	PAC
10125.1599.005F3.RF3.01.12965.mzXML	0	1599_005F3_RF3_01_12965.mzXML	TRUE	2006-03-12	marine metagenome	GAZ:Panama	1599_005F3_RF3_01_12965.mzXML	0	PAC12MAR06.D38 Leptolyngbya	FALSE	0	ENVO:marine biome	ENVO:sea water	ENVO:organic material	Leptolyngbya	F	TRUE	TRUE	Leptolyngbya	cyanobacteria	1599.005F3.RF3.01.12965	1117	7.39403	-81.6713	UCSD	UCSDMI	TRUE	FALSE	completed	UCSD	cyanobacteria	408172	Cyanobacteria	PAC
10125.1599.005F4.RF4.01.12966.mzXML	0	1599_005F4_RF4_01_12966.mzXML	TRUE	2006-03-12	marine metagenome	GAZ:Panama	1599_005F4_RF4_01_12966.mzXML	0	PAC12MAR06.D38 Leptolyngbya	FALSE	0	ENVO:marine biome	ENVO:sea water	ENVO:organic material	Leptolyngbya	G	TRUE	TRUE	Leptolyngbya	cyanobacteria	1599.005F4.RF4.01.12966	1117	7.39403	-81.6713	UCSD	UCSDMI	TRUE	FALSE	completed	UCSD	cyanobacteria	408172	Cyanobacteria	PAC
10125.1599.005F5.RF5.01.12967.mzXML	0	1599_005F5_RF5_01_12967.mzXML	TRUE	2006-03-12	marine metagenome	GAZ:Panama	1599_005F5_RF5_01_12967.mzXML	0	PAC12MAR06.D38 Leptolyngbya	FALSE	0	ENVO:marine biome	ENVO:sea water	ENVO:organic material	Leptolyngbya	I	TRUE	TRUE	Leptolyngbya	cyanobacteria	1599.005F5.RF5.01.12967	1117	7.39403	-81.6713	UCSD	UCSDMI	TRUE	FALSE	completed	UCSD	cyanobacteria	408172	Cyanobacteria	PAC
10125.1651.009A10.RA10.01.13315.mzXML	0	1651_009A10_RA10_01_13315.mzXML	TRUE	2006-03-08	marine metagenome	GAZ:Panama	1651_009A10_RA10_01_13315.mzXML	0	PAC8MAR06.D1 Lyngbya sp.	FALSE	0	ENVO:marine biome	ENVO:sea water	ENVO:organic material	Lyngbya sp.	F	TRUE	TRUE	Lyngbya sp.	cyanobacteria	1651.009A10.RA10.01.13315	1117	7.69686	-81.6091	UCSD	UCSDMI	TRUE	FALSE	completed	UCSD	cyanobacteria	408172	Cyanobacteria	PAC
10125.1651.009A11.RA11.01.13316.mzXML	0	1651_009A11_RA11_01_13316.mzXML	TRUE	2006-03-08	marine metagenome	GAZ:Panama	1651_009A11_RA11_01_13316.mzXML	0	PAC8MAR06.D1 Lyngbya sp.	FALSE	0	ENVO:marine biome	ENVO:sea water	ENVO:organic material	Lyngbya sp.	G	TRUE	TRUE	Lyngbya sp.	cyanobacteria	1651.009A11.RA11.01.13316	1117	7.69686	-81.6091	UCSD	UCSDMI	TRUE	FALSE	completed	UCSD	cyanobacteria	408172	Cyanobacteria	PAC
10125.1651.009A4.RA4.01.13309.mzXML	0	1651_009A4_RA4_01_13309.mzXML	TRUE	2006-03-08	marine metagenome	GAZ:Panama	1651_009A4_RA4_01_13309.mzXML	0	PAC8MAR06.D1 Lyngbya sp.	FALSE	0	ENVO:marine biome	ENVO:sea water	ENVO:organic material	Lyngbya sp.	Crude	TRUE	TRUE	Lyngbya sp.	cyanobacteria	1651.009A4.RA4.01.13309	1117	7.69686	-81.6091	UCSD	UCSDMI	TRUE	FALSE	completed	UCSD	cyanobacteria	408172	Cyanobacteria	PAC
10125.1651.009A5.RA5.01.13310.mzXML	0	1651_009A5_RA5_01_13310.mzXML	TRUE	2006-03-08	marine metagenome	GAZ:Panama	1651_009A5_RA5_01_13310.mzXML	0	PAC8MAR06.D1 Lyngbya sp.	FALSE	0	ENVO:marine biome	ENVO:sea water	ENVO:organic material	Lyngbya sp.	A	TRUE	TRUE	Lyngbya sp.	cyanobacteria	1651.009A5.RA5.01.13310	1117	7.69686	-81.6091	UCSD	UCSDMI	TRUE	FALSE	completed	UCSD	cyanobacteria	408172	Cyanobacteria	PAC
10125.1651.009A6.RA6.01.13311.mzXML	0	1651_009A6_RA6_01_13311.mzXML	TRUE	2006-03-08	marine metagenome	GAZ:Panama	1651_009A6_RA6_01_13311.mzXML	0	PAC8MAR06.D1 Lyngbya sp.	FALSE	0	ENVO:marine biome	ENVO:sea water	ENVO:organic material	Lyngbya sp.	B	TRUE	TRUE	Lyngbya sp.	cyanobacteria	1651.009A6.RA6.01.13311	1117	7.69686	-81.6091	UCSD	UCSDMI	TRUE	FALSE	completed	UCSD	cyanobacteria	408172	Cyanobacteria	PAC
10125.1651.009A7.RA7.01.13312.mzXML	0	1651_009A7_RA7_01_13312.mzXML	TRUE	2006-03-08	marine metagenome	GAZ:Panama	1651_009A7_RA7_01_13312.mzXML	0	PAC8MAR06.D1 Lyngbya sp.	FALSE	0	ENVO:marine biome	ENVO:sea water	ENVO:organic material	Lyngbya sp.	C	TRUE	TRUE	Lyngbya sp.	cyanobacteria	1651.009A7.RA7.01.13312	1117	7.69686	-81.6091	UCSD	UCSDMI	TRUE	FALSE	completed	UCSD	cyanobacteria	408172	Cyanobacteria	PAC
10125.1651.009A8.RA8.01.13313.mzXML	0	1651_009A8_RA8_01_13313.mzXML	TRUE	2006-03-08	marine metagenome	GAZ:Panama	1651_009A8_RA8_01_13313.mzXML	0	PAC8MAR06.D1 Lyngbya sp.	FALSE	0	ENVO:marine biome	ENVO:sea water	ENVO:organic material	Lyngbya sp.	D	TRUE	TRUE	Lyngbya sp.	cyanobacteria	1651.009A8.RA8.01.13313	1117	7.69686	-81.6091	UCSD	UCSDMI	TRUE	FALSE	completed	UCSD	cyanobacteria	408172	Cyanobacteria	PAC
10125.1651.009A9.RA9.01.13314.mzXML	0	1651_009A9_RA9_01_13314.mzXML	TRUE	2006-03-08	marine metagenome	GAZ:Panama	1651_009A9_RA9_01_13314.mzXML	0	PAC8MAR06.D1 Lyngbya sp.	FALSE	0	ENVO:marine biome	ENVO:sea water	ENVO:organic material	Lyngbya sp.	E	TRUE	TRUE	Lyngbya sp.	cyanobacteria	1651.009A9.RA9.01.13314	1117	7.69686	-81.6091	UCSD	UCSDMI	TRUE	FALSE	completed	UCSD	cyanobacteria	408172	Cyanobacteria	PAC
10125.1651.009B1.RB1.01.13317.mzXML	0	1651_009B1_RB1_01_13317.mzXML	TRUE	2006-03-08	marine metagenome	GAZ:Panama	1651_009B1_RB1_01_13317.mzXML	0	PAC8MAR06.D1 Lyngbya sp.	FALSE	0	ENVO:marine biome	ENVO:sea water	ENVO:organic material	Lyngbya sp.	H	TRUE	TRUE	Lyngbya sp.	cyanobacteria	1651.009B1.RB1.01.13317	1117	7.69686	-81.6091	UCSD	UCSDMI	TRUE	FALSE	completed	UCSD	cyanobacteria	408172	Cyanobacteria	PAC
10125.1651.009B2.RB2.01.13318.mzXML	0	1651_009B2_RB2_01_13318.mzXML	TRUE	2006-03-08	marine metagenome	GAZ:Panama	1651_009B2_RB2_01_13318.mzXML	0	PAC8MAR06.D1 Lyngbya sp.	FALSE	0	ENVO:marine biome	ENVO:sea water	ENVO:organic material	Lyngbya sp.	I	TRUE	TRUE	Lyngbya sp.	cyanobacteria	1651.009B2.RB2.01.13318	1117	7.69686	-81.6091	UCSD	UCSDMI	TRUE	FALSE	completed	UCSD	cyanobacteria	408172	Cyanobacteria	PAC
10125.1945.027G10.RG10.01.15249.mzXML	0	1945_027G10_RG10_01_15249.mzXML	TRUE	2010-02-16	marine metagenome	GAZ:Panama	1945_027G10_RG10_01_15249.mzXML	0	PAC16FEB10.1 Brown lyngbya	FALSE	0	ENVO:marine biome	ENVO:sea water	ENVO:organic material	Brown lyngbya	D	TRUE	TRUE	Brown lyngbya	cyanobacteria	1945.027G10.RG10.01.15249	1117	7.69538	-81.6338	UCSD	UCSDMI	TRUE	FALSE	completed	UCSD	cyanobacteria	408172	Cyanobacteria	PAC
10125.1945.027G11.RG11.01.15250.mzXML	0	1945_027G11_RG11_01_15250.mzXML	TRUE	2010-02-16	marine metagenome	GAZ:Panama	1945_027G11_RG11_01_15250.mzXML	0	PAC16FEB10.1 Brown lyngbya	FALSE	0	ENVO:marine biome	ENVO:sea water	ENVO:organic material	Brown lyngbya	G	TRUE	TRUE	Brown lyngbya	cyanobacteria	1945.027G11.RG11.01.15250	1117	7.69538	-81.6338	UCSD	UCSDMI	TRUE	FALSE	completed	UCSD	cyanobacteria	408172	Cyanobacteria	PAC
10125.1945.027G7.RG7.01.15245.mzXML	0	1945_027G7_RG7_01_15245.mzXML	TRUE	2010-02-16	marine metagenome	GAZ:Panama	1945_027G7_RG7_01_15245.mzXML	0	PAC16FEB10.1 Brown lyngbya	FALSE	0	ENVO:marine biome	ENVO:sea water	ENVO:organic material	Brown lyngbya	Crude	TRUE	TRUE	Brown lyngbya	cyanobacteria	1945.027G7.RG7.01.15245	1117	7.69538	-81.6338	UCSD	UCSDMI	TRUE	FALSE	completed	UCSD	cyanobacteria	408172	Cyanobacteria	PAC
10125.1945.027G8.RG8.01.15247.mzXML	0	1945_027G8_RG8_01_15247.mzXML	TRUE	2010-02-16	marine metagenome	GAZ:Panama	1945_027G8_RG8_01_15247.mzXML	0	PAC16FEB10.1 Brown lyngbya	FALSE	0	ENVO:marine biome	ENVO:sea water	ENVO:organic material	Brown lyngbya	B	TRUE	TRUE	Brown lyngbya	cyanobacteria	1945.027G8.RG8.01.15247	1117	7.69538	-81.6338	UCSD	UCSDMI	TRUE	FALSE	completed	UCSD	cyanobacteria	408172	Cyanobacteria	PAC
10125.1945.027G9.RG9.01.15248.mzXML	0	1945_027G9_RG9_01_15248.mzXML	TRUE	2010-02-16	marine metagenome	GAZ:Panama	1945_027G9_RG9_01_15248.mzXML	0	PAC16FEB10.1 Brown lyngbya	FALSE	0	ENVO:marine biome	ENVO:sea water	ENVO:organic material	Brown lyngbya	C	TRUE	TRUE	Brown lyngbya	cyanobacteria	1945.027G9.RG9.01.15248	1117	7.69538	-81.6338	UCSD	UCSDMI	TRUE	FALSE	completed	UCSD	cyanobacteria	408172	Cyanobacteria	PAC
10125.1945.027H1.RH1.01.15251.mzXML	0	1945_027H1_RH1_01_15251.mzXML	TRUE	2010-02-16	marine metagenome	GAZ:Panama	1945_027H1_RH1_01_15251.mzXML	0	PAC16FEB10.1 Brown lyngbya	FALSE	0	ENVO:marine biome	ENVO:sea water	ENVO:organic material	Brown lyngbya	H	TRUE	TRUE	Brown lyngbya	cyanobacteria	1945.027H1.RH1.01.15251	1117	7.69538	-81.6338	UCSD	UCSDMI	TRUE	FALSE	completed	UCSD	cyanobacteria	408172	Cyanobacteria	PAC
10125.1945.027H2.RH2.01.15252.mzXML	0	1945_027H2_RH2_01_15252.mzXML	TRUE	2010-02-16	marine metagenome	GAZ:Panama	1945_027H2_RH2_01_15252.mzXML	0	PAC16FEB10.1 Brown lyngbya	FALSE	0	ENVO:marine biome	ENVO:sea water	ENVO:organic material	Brown lyngbya	J	TRUE	TRUE	Brown lyngbya	cyanobacteria	1945.027H2.RH2.01.15252	1117	7.69538	-81.6338	UCSD	UCSDMI	TRUE	FALSE	completed	UCSD	cyanobacteria	408172	Cyanobacteria	PAC
10125.1950.028A1.2.GA1.01.15270.mzXML	0	1950_028A1_2_GA1_01_15270.mzXML	TRUE	2010-02-17	marine metagenome	GAZ:Panama	1950_028A1_2_GA1_01_15270.mzXML	0	PAC17FEB10.4 Hormothamnion sp.	FALSE	0	ENVO:marine biome	ENVO:sea water	ENVO:organic material	Hormothamnion sp.	B	TRUE	TRUE	Hormothamnion sp.	cyanobacteria	1950.028A1.2.GA1.01.15270	408172	7.69902	-81.6234	UCSD	UCSDMI	TRUE	FALSE	completed	UCSD	cyanobacteria	408172	Cyanobacteria	PAC
10125.1950.028A2.GA2.01.15271.mzXML	0	1950_028A2_GA2_01_15271.mzXML	TRUE	2010-02-17	marine metagenome	GAZ:Panama	1950_028A2_GA2_01_15271.mzXML	0	PAC17FEB10.4 Hormothamnion sp.	FALSE	0	ENVO:marine biome	ENVO:sea water	ENVO:organic material	Hormothamnion sp.	C	TRUE	TRUE	Hormothamnion sp.	cyanobacteria	1950.028A2.GA2.01.15271	408172	7.69902	-81.6234	UCSD	UCSDMI	TRUE	FALSE	completed	UCSD	cyanobacteria	408172	Cyanobacteria	PAC
10125.1950.028A3.GA3.01.15272.mzXML	0	1950_028A3_GA3_01_15272.mzXML	TRUE	2010-02-17	marine metagenome	GAZ:Panama	1950_028A3_GA3_01_15272.mzXML	0	PAC17FEB10.4 Hormothamnion sp.	FALSE	0	ENVO:marine biome	ENVO:sea water	ENVO:organic material	Hormothamnion sp.	D	TRUE	TRUE	Hormothamnion sp.	cyanobacteria	1950.028A3.GA3.01.15272	408172	7.69902	-81.6234	UCSD	UCSDMI	TRUE	FALSE	completed	UCSD	cyanobacteria	408172	Cyanobacteria	PAC
10125.1950.028A4.GA4.01.15273.mzXML	0	1950_028A4_GA4_01_15273.mzXML	TRUE	2010-02-17	marine metagenome	GAZ:Panama	1950_028A4_GA4_01_15273.mzXML	0	PAC17FEB10.4 Hormothamnion sp.	FALSE	0	ENVO:marine biome	ENVO:sea water	ENVO:organic material	Hormothamnion sp.	I	TRUE	TRUE	Hormothamnion sp.	cyanobacteria	1950.028A4.GA4.01.15273	408172	7.69902	-81.6234	UCSD	UCSDMI	TRUE	FALSE	completed	UCSD	cyanobacteria	408172	Cyanobacteria	PAC
10125.1987.030H1.GH1.01.15569.mzXML	0	1987_030H1_GH1_01_15569.mzXML	TRUE	2010-02-18	marine metagenome	GAZ:Panama	1987_030H1_GH1_01_15569.mzXML	0	PAC18FEB10.4 Schizothrix	FALSE	0	ENVO:marine biome	ENVO:sea water	ENVO:organic material	Schizothrix	A	TRUE	TRUE	Schizothrix	cyanobacteria	1987.030H1.GH1.01.15569	1117	7.80815	-81.7607	UCSD	UCSDMI	TRUE	FALSE	completed	UCSD	cyanobacteria	408172	Cyanobacteria	PAC
10125.1987.030H2.GH2.01.15570.mzXML	0	1987_030H2_GH2_01_15570.mzXML	TRUE	2010-02-18	marine metagenome	GAZ:Panama	1987_030H2_GH2_01_15570.mzXML	0	PAC18FEB10.4 Schizothrix	FALSE	0	ENVO:marine biome	ENVO:sea water	ENVO:organic material	Schizothrix	B	TRUE	TRUE	Schizothrix	cyanobacteria	1987.030H2.GH2.01.15570	1117	7.80815	-81.7607	UCSD	UCSDMI	TRUE	FALSE	completed	UCSD	cyanobacteria	408172	Cyanobacteria	PAC
10125.1987.030H3.GH3.01.15571.mzXML	0	1987_030H3_GH3_01_15571.mzXML	TRUE	2010-02-18	marine metagenome	GAZ:Panama	1987_030H3_GH3_01_15571.mzXML	0	PAC18FEB10.4 Schizothrix	FALSE	0	ENVO:marine biome	ENVO:sea water	ENVO:organic material	Schizothrix	C	TRUE	TRUE	Schizothrix	cyanobacteria	1987.030H3.GH3.01.15571	1117	7.80815	-81.7607	UCSD	UCSDMI	TRUE	FALSE	completed	UCSD	cyanobacteria	408172	Cyanobacteria	PAC
10125.1987.030H4.GH4.01.15572.mzXML	0	1987_030H4_GH4_01_15572.mzXML	TRUE	2010-02-18	marine metagenome	GAZ:Panama	1987_030H4_GH4_01_15572.mzXML	0	PAC18FEB10.4 Schizothrix	FALSE	0	ENVO:marine biome	ENVO:sea water	ENVO:organic material	Schizothrix	D	TRUE	TRUE	Schizothrix	cyanobacteria	1987.030H4.GH4.01.15572	1117	7.80815	-81.7607	UCSD	UCSDMI	TRUE	FALSE	completed	UCSD	cyanobacteria	408172	Cyanobacteria	PAC
10125.1987.030H5.GH5.01.15573.mzXML	0	1987_030H5_GH5_01_15573.mzXML	TRUE	2010-02-18	marine metagenome	GAZ:Panama	1987_030H5_GH5_01_15573.mzXML	0	PAC18FEB10.4 Schizothrix	FALSE	0	ENVO:marine biome	ENVO:sea water	ENVO:organic material	Schizothrix	E	TRUE	TRUE	Schizothrix	cyanobacteria	1987.030H5.GH5.01.15573	1117	7.80815	-81.7607	UCSD	UCSDMI	TRUE	FALSE	completed	UCSD	cyanobacteria	408172	Cyanobacteria	PAC
10125.1987.030H6.3.GH6.01.15578.mzXML	0	1987_030H6_3_GH6_01_15578.mzXML	TRUE	2010-02-18	marine metagenome	GAZ:Panama	1987_030H6_3_GH6_01_15578.mzXML	0	PAC18FEB10.4 Schizothrix	FALSE	0	ENVO:marine biome	ENVO:sea water	ENVO:organic material	Schizothrix	F	TRUE	TRUE	Schizothrix	cyanobacteria	1987.030H6.3.GH6.01.15578	1117	7.80815	-81.7607	UCSD	UCSDMI	TRUE	FALSE	completed	UCSD	cyanobacteria	408172	Cyanobacteria	PAC
10125.1987.030H8.GH8.01.15576.mzXML	0	1987_030H8_GH8_01_15576.mzXML	TRUE	2010-02-18	marine metagenome	GAZ:Panama	1987_030H8_GH8_01_15576.mzXML	0	PAC18FEB10.4 Schizothrix	FALSE	0	ENVO:marine biome	ENVO:sea water	ENVO:organic material	Schizothrix	H	TRUE	TRUE	Schizothrix	cyanobacteria	1987.030H8.GH8.01.15576	1117	7.80815	-81.7607	UCSD	UCSDMI	TRUE	FALSE	completed	UCSD	cyanobacteria	408172	Cyanobacteria	PAC
10125.1987.030H9.GH9.01.15577.mzXML	0	1987_030H9_GH9_01_15577.mzXML	TRUE	2010-02-18	marine metagenome	GAZ:Panama	1987_030H9_GH9_01_15577.mzXML	0	PAC18FEB10.4 Schizothrix	FALSE	0	ENVO:marine biome	ENVO:sea water	ENVO:organic material	Schizothrix	I	TRUE	TRUE	Schizothrix	cyanobacteria	1987.030H9.GH9.01.15577	1117	7.80815	-81.7607	UCSD	UCSDMI	TRUE	FALSE	completed	UCSD	cyanobacteria	408172	Cyanobacteria	PAC
10125.A1721.011D7.RD7.01.13676.mzXML	0	A1721_011D7_RD7_01_13676.mzXML	TRUE	2007-03-01	marine metagenome	GAZ:Panama	A1721_011D7_RD7_01_13676.mzXML	0	PAC01MAR07.2 lyngbya	FALSE	0	ENVO:marine biome	ENVO:sea water	ENVO:organic material	lyngbya	D	TRUE	TRUE	lyngbya	cyanobacteria	A1721.011D7.RD7.01.13676	1117	8.07778	-82.1833	UCSD	UCSDMI	TRUE	FALSE	completed	UCSD	cyanobacteria	408172	Cyanobacteria	PAC
10125.A1821.017B3.RB3.01.14127.mzXML	0	A1821_017B3_RB3_01_14127.mzXML	TRUE	2007-06-20	marine metagenome	GAZ:Panama	A1821_017B3_RB3_01_14127.mzXML	0	PAC20JUN07.1 unknown	FALSE	0	ENVO:marine biome	ENVO:sea water	ENVO:organic material	other	Crude	TRUE	TRUE	other	other	A1821.017B3.RB3.01.14127	408172	7.58562	-81.8414	UCSD	UCSDMI	TRUE	FALSE	completed	UCSD	cyanobacteria	408172	Cyanobacteria	PAC
10125.A1831.018A6.GA6.01.14226.mzXML	0	A1831_018A6_GA6_01_14226.mzXML	TRUE	2008-08-10	marine metagenome	GAZ:Panama	A1831_018A6_GA6_01_14226.mzXML	0	PAC10AUG08.2 lyngbya penicelliformis	FALSE	0	ENVO:marine biome	ENVO:sea water	ENVO:organic material	lyngbya penicelliformis	Crude	TRUE	TRUE	lyngbya penicelliformis	cyanobacteria	A1831.018A6.GA6.01.14226	1117	32.8427	-117.258	UCSD	UCSDMI	TRUE	FALSE	completed	UCSD	cyanobacteria	408172	Cyanobacteria	PAC
10125.A2027.031A1.FractionA.RA1.01.18748.mzXML	0	A2027_031A1_FractionA_RA1_01_18748.mzXML	TRUE	2011-02-17	marine metagenome	GAZ:Panama	A2027_031A1_FractionA_RA1_01_18748.mzXML	0	PAC17FEB11.1 green/brown mat	FALSE	0	ENVO:marine biome	ENVO:sea water	ENVO:organic material	green brown mat	A	TRUE	TRUE	green brown mat	cyanobacteria	A2027.031A1.FractionA.RA1.01.18748	1117	32.8427	-117.258	UCSD	UCSDMI	TRUE	FALSE	completed	UCSD	cyanobacteria	408172	Cyanobacteria	PAC
10125.A2027.031A2.FractionB.RA2.01.18749.mzXML	0	A2027_031A2_FractionB_RA2_01_18749.mzXML	TRUE	2011-02-17	marine metagenome	GAZ:Panama	A2027_031A2_FractionB_RA2_01_18749.mzXML	0	PAC17FEB11.1 green/brown mat	FALSE	0	ENVO:marine biome	ENVO:sea water	ENVO:organic material	green brown mat	B	TRUE	TRUE	green brown mat	cyanobacteria	A2027.031A2.FractionB.RA2.01.18749	1117	32.8427	-117.258	UCSD	UCSDMI	TRUE	FALSE	completed	UCSD	cyanobacteria	408172	Cyanobacteria	PAC
10125.A2027.031A3.C.RA3.01.18750.mzXML	0	A2027_031A3_C_RA3_01_18750.mzXML	TRUE	2011-02-17	marine metagenome	GAZ:Panama	A2027_031A3_C_RA3_01_18750.mzXML	0	PAC17FEB11.1 green/brown mat	FALSE	0	ENVO:marine biome	ENVO:sea water	ENVO:organic material	green brown mat	C	TRUE	TRUE	green brown mat	cyanobacteria	A2027.031A3.C.RA3.01.18750	1117	32.8427	-117.258	UCSD	UCSDMI	TRUE	FALSE	completed	UCSD	cyanobacteria	408172	Cyanobacteria	PAC
10125.A2027.031A4.D.RA4.01.18751.mzXML	0	A2027_031A4_D_RA4_01_18751.mzXML	TRUE	2011-02-17	marine metagenome	GAZ:Panama	A2027_031A4_D_RA4_01_18751.mzXML	0	PAC17FEB11.1 green/brown mat	FALSE	0	ENVO:marine biome	ENVO:sea water	ENVO:organic material	green brown mat	D	TRUE	TRUE	green brown mat	cyanobacteria	A2027.031A4.D.RA4.01.18751	1117	32.8427	-117.258	UCSD	UCSDMI	TRUE	FALSE	completed	UCSD	cyanobacteria	408172	Cyanobacteria	PAC
10125.A2027.031A5.F.RA5.01.18752.mzXML	0	A2027_031A5_F_RA5_01_18752.mzXML	TRUE	2011-02-17	marine metagenome	GAZ:Panama	A2027_031A5_F_RA5_01_18752.mzXML	0	PAC17FEB11.1 green/brown mat	FALSE	0	ENVO:marine biome	ENVO:sea water	ENVO:organic material	green brown mat	F	TRUE	TRUE	green brown mat	cyanobacteria	A2027.031A5.F.RA5.01.18752	1117	32.8427	-117.258	UCSD	UCSDMI	TRUE	FALSE	completed	UCSD	cyanobacteria	408172	Cyanobacteria	PAC
10125.A2027.031A6.G.RA6.01.18753.mzXML	0	A2027_031A6_G_RA6_01_18753.mzXML	TRUE	2011-02-17	marine metagenome	GAZ:Panama	A2027_031A6_G_RA6_01_18753.mzXML	0	PAC17FEB11.1 green/brown mat	FALSE	0	ENVO:marine biome	ENVO:sea water	ENVO:organic material	green brown mat	G	TRUE	TRUE	green brown mat	cyanobacteria	A2027.031A6.G.RA6.01.18753	1117	32.8427	-117.258	UCSD	UCSDMI	TRUE	FALSE	completed	UCSD	cyanobacteria	408172	Cyanobacteria	PAC
10125.A1679.010A1.GA1.01.13414.mzXML	0	A1679_010A1_GA1_01_13414.mzXML	TRUE	2007-02-28	marine metagenome	GAZ:Panama	A1679_010A1_GA1_01_13414.mzXML	0	PAG28FEB07.3 Lyngbya sp.	FALSE	0	ENVO:marine biome	ENVO:sea water	ENVO:organic material	Lyngbya sp.	Crude	TRUE	TRUE	Lyngbya sp.	cyanobacteria	A1679.010A1.GA1.01.13414	1117	8.12737	-82.3103	UCSD	UCSDMI	TRUE	FALSE	completed	UCSD	cyanobacteria	408172	Cyanobacteria	PAG
10125.A1679.010A10.GA10.01.13423.mzXML	0	A1679_010A10_GA10_01_13423.mzXML	TRUE	2007-02-28	marine metagenome	GAZ:Panama	A1679_010A10_GA10_01_13423.mzXML	0	PAG28FEB07.3 Lyngbya sp.	FALSE	0	ENVO:marine biome	ENVO:sea water	ENVO:organic material	Lyngbya sp.	I	TRUE	TRUE	Lyngbya sp.	cyanobacteria	A1679.010A10.GA10.01.13423	1117	8.12737	-82.3103	UCSD	UCSDMI	TRUE	FALSE	completed	UCSD	cyanobacteria	408172	Cyanobacteria	PAG
10125.A1679.010A2.GA2.01.13415.mzXML	0	A1679_010A2_GA2_01_13415.mzXML	TRUE	2007-02-28	marine metagenome	GAZ:Panama	A1679_010A2_GA2_01_13415.mzXML	0	PAG28FEB07.3 Lyngbya sp.	FALSE	0	ENVO:marine biome	ENVO:sea water	ENVO:organic material	Lyngbya sp.	A	TRUE	TRUE	Lyngbya sp.	cyanobacteria	A1679.010A2.GA2.01.13415	1117	8.12737	-82.3103	UCSD	UCSDMI	TRUE	FALSE	completed	UCSD	cyanobacteria	408172	Cyanobacteria	PAG
10125.A1679.010A3.GA3.01.13416.mzXML	0	A1679_010A3_GA3_01_13416.mzXML	TRUE	2007-02-28	marine metagenome	GAZ:Panama	A1679_010A3_GA3_01_13416.mzXML	0	PAG28FEB07.3 Lyngbya sp.	FALSE	0	ENVO:marine biome	ENVO:sea water	ENVO:organic material	Lyngbya sp.	B	TRUE	TRUE	Lyngbya sp.	cyanobacteria	A1679.010A3.GA3.01.13416	1117	8.12737	-82.3103	UCSD	UCSDMI	TRUE	FALSE	completed	UCSD	cyanobacteria	408172	Cyanobacteria	PAG
10125.A1679.010A4.GA4.01.13417.mzXML	0	A1679_010A4_GA4_01_13417.mzXML	TRUE	2007-02-28	marine metagenome	GAZ:Panama	A1679_010A4_GA4_01_13417.mzXML	0	PAG28FEB07.3 Lyngbya sp.	FALSE	0	ENVO:marine biome	ENVO:sea water	ENVO:organic material	Lyngbya sp.	C	TRUE	TRUE	Lyngbya sp.	cyanobacteria	A1679.010A4.GA4.01.13417	1117	8.12737	-82.3103	UCSD	UCSDMI	TRUE	FALSE	completed	UCSD	cyanobacteria	408172	Cyanobacteria	PAG
10125.A1679.010A5.GA5.01.13418.mzXML	0	A1679_010A5_GA5_01_13418.mzXML	TRUE	2007-02-28	marine metagenome	GAZ:Panama	A1679_010A5_GA5_01_13418.mzXML	0	PAG28FEB07.3 Lyngbya sp.	FALSE	0	ENVO:marine biome	ENVO:sea water	ENVO:organic material	Lyngbya sp.	D	TRUE	TRUE	Lyngbya sp.	cyanobacteria	A1679.010A5.GA5.01.13418	1117	8.12737	-82.3103	UCSD	UCSDMI	TRUE	FALSE	completed	UCSD	cyanobacteria	408172	Cyanobacteria	PAG
10125.A1679.010A6.GA6.01.13419.mzXML	0	A1679_010A6_GA6_01_13419.mzXML	TRUE	2007-02-28	marine metagenome	GAZ:Panama	A1679_010A6_GA6_01_13419.mzXML	0	PAG28FEB07.3 Lyngbya sp.	FALSE	0	ENVO:marine biome	ENVO:sea water	ENVO:organic material	Lyngbya sp.	E	TRUE	TRUE	Lyngbya sp.	cyanobacteria	A1679.010A6.GA6.01.13419	1117	8.12737	-82.3103	UCSD	UCSDMI	TRUE	FALSE	completed	UCSD	cyanobacteria	408172	Cyanobacteria	PAG
10125.A1679.010A7.GA7.01.13420.mzXML	0	A1679_010A7_GA7_01_13420.mzXML	TRUE	2007-02-28	marine metagenome	GAZ:Panama	A1679_010A7_GA7_01_13420.mzXML	0	PAG28FEB07.3 Lyngbya sp.	FALSE	0	ENVO:marine biome	ENVO:sea water	ENVO:organic material	Lyngbya sp.	F	TRUE	TRUE	Lyngbya sp.	cyanobacteria	A1679.010A7.GA7.01.13420	1117	8.12737	-82.3103	UCSD	UCSDMI	TRUE	FALSE	completed	UCSD	cyanobacteria	408172	Cyanobacteria	PAG
10125.A1679.010A8.GA8.01.13421.mzXML	0	A1679_010A8_GA8_01_13421.mzXML	TRUE	2007-02-28	marine metagenome	GAZ:Panama	A1679_010A8_GA8_01_13421.mzXML	0	PAG28FEB07.3 Lyngbya sp.	FALSE	0	ENVO:marine biome	ENVO:sea water	ENVO:organic material	Lyngbya sp.	G	TRUE	TRUE	Lyngbya sp.	cyanobacteria	A1679.010A8.GA8.01.13421	1117	8.12737	-82.3103	UCSD	UCSDMI	TRUE	FALSE	completed	UCSD	cyanobacteria	408172	Cyanobacteria	PAG
10125.A1679.010A9.GA9.01.13422.mzXML	0	A1679_010A9_GA9_01_13422.mzXML	TRUE	2007-02-28	marine metagenome	GAZ:Panama	A1679_010A9_GA9_01_13422.mzXML	0	PAG28FEB07.3 Lyngbya sp.	FALSE	0	ENVO:marine biome	ENVO:sea water	ENVO:organic material	Lyngbya sp.	H	TRUE	TRUE	Lyngbya sp.	cyanobacteria	A1679.010A9.GA9.01.13422	1117	8.12737	-82.3103	UCSD	UCSDMI	TRUE	FALSE	completed	UCSD	cyanobacteria	408172	Cyanobacteria	PAG
10125.A1681.010B1.GB1.01.13426.mzXML	0	A1681_010B1_GB1_01_13426.mzXML	TRUE	2007-03-01	marine metagenome	GAZ:Panama	A1681_010B1_GB1_01_13426.mzXML	0	PAG1MAR07.2 Phormidium	FALSE	0	ENVO:marine biome	ENVO:sea water	ENVO:organic material	Phormidium	A	TRUE	TRUE	Phormidium	cyanobacteria	A1681.010B1.GB1.01.13426	1117	8.12962	-82.3177	UCSD	UCSDMI	TRUE	FALSE	completed	UCSD	cyanobacteria	408172	Cyanobacteria	PAG
10125.A1681.010B2.GB2.01.13427.mzXML	0	A1681_010B2_GB2_01_13427.mzXML	TRUE	2007-03-01	marine metagenome	GAZ:Panama	A1681_010B2_GB2_01_13427.mzXML	0	PAG1MAR07.2 Phormidium	FALSE	0	ENVO:marine biome	ENVO:sea water	ENVO:organic material	Phormidium	B	TRUE	TRUE	Phormidium	cyanobacteria	A1681.010B2.GB2.01.13427	1117	8.12962	-82.3177	UCSD	UCSDMI	TRUE	FALSE	completed	UCSD	cyanobacteria	408172	Cyanobacteria	PAG
10125.A1681.010B3.GB3.01.13428.mzXML	0	A1681_010B3_GB3_01_13428.mzXML	TRUE	2007-03-01	marine metagenome	GAZ:Panama	A1681_010B3_GB3_01_13428.mzXML	0	PAG1MAR07.2 Phormidium	FALSE	0	ENVO:marine biome	ENVO:sea water	ENVO:organic material	Phormidium	C	TRUE	TRUE	Phormidium	cyanobacteria	A1681.010B3.GB3.01.13428	1117	8.12962	-82.3177	UCSD	UCSDMI	TRUE	FALSE	completed	UCSD	cyanobacteria	408172	Cyanobacteria	PAG
10125.A1681.010B4.GB4.01.13429.mzXML	0	A1681_010B4_GB4_01_13429.mzXML	TRUE	2007-03-01	marine metagenome	GAZ:Panama	A1681_010B4_GB4_01_13429.mzXML	0	PAG1MAR07.2 Phormidium	FALSE	0	ENVO:marine biome	ENVO:sea water	ENVO:organic material	Phormidium	D	TRUE	TRUE	Phormidium	cyanobacteria	A1681.010B4.GB4.01.13429	1117	8.12962	-82.3177	UCSD	UCSDMI	TRUE	FALSE	completed	UCSD	cyanobacteria	408172	Cyanobacteria	PAG
10125.A1681.010B5.GB5.01.13430.mzXML	0	A1681_010B5_GB5_01_13430.mzXML	TRUE	2007-03-01	marine metagenome	GAZ:Panama	A1681_010B5_GB5_01_13430.mzXML	0	PAG1MAR07.2 Phormidium	FALSE	0	ENVO:marine biome	ENVO:sea water	ENVO:organic material	Phormidium	E	TRUE	TRUE	Phormidium	cyanobacteria	A1681.010B5.GB5.01.13430	1117	8.12962	-82.3177	UCSD	UCSDMI	TRUE	FALSE	completed	UCSD	cyanobacteria	408172	Cyanobacteria	PAG
10125.A1681.010B6.GB6.01.13431.mzXML	0	A1681_010B6_GB6_01_13431.mzXML	TRUE	2007-03-01	marine metagenome	GAZ:Panama	A1681_010B6_GB6_01_13431.mzXML	0	PAG1MAR07.2 Phormidium	FALSE	0	ENVO:marine biome	ENVO:sea water	ENVO:organic material	Phormidium	F	TRUE	TRUE	Phormidium	cyanobacteria	A1681.010B6.GB6.01.13431	1117	8.12962	-82.3177	UCSD	UCSDMI	TRUE	FALSE	completed	UCSD	cyanobacteria	408172	Cyanobacteria	PAG
10125.A1683.010B10.GB10.01.13436.mzXML	0	A1683_010B10_GB10_01_13436.mzXML	TRUE	2007-02-28	marine metagenome	GAZ:Panama	A1683_010B10_GB10_01_13436.mzXML	0	PAG28FEB07.4 Lyngbya sp.	FALSE	0	ENVO:marine biome	ENVO:sea water	ENVO:organic material	Lyngbya sp.	C	TRUE	TRUE	Lyngbya sp.	cyanobacteria	A1683.010B10.GB10.01.13436	1117	8.12737	-82.3103	UCSD	UCSDMI	TRUE	FALSE	completed	UCSD	cyanobacteria	408172	Cyanobacteria	PAG
10125.A1683.010B11.GB11.01.13437.mzXML	0	A1683_010B11_GB11_01_13437.mzXML	TRUE	2007-02-28	marine metagenome	GAZ:Panama	A1683_010B11_GB11_01_13437.mzXML	0	PAG28FEB07.4 Lyngbya sp.	FALSE	0	ENVO:marine biome	ENVO:sea water	ENVO:organic material	Lyngbya sp.	D	TRUE	TRUE	Lyngbya sp.	cyanobacteria	A1683.010B11.GB11.01.13437	1117	8.12737	-82.3103	UCSD	UCSDMI	TRUE	FALSE	completed	UCSD	cyanobacteria	408172	Cyanobacteria	PAG
10125.A1683.010B7.GB7.01.13433.mzXML	0	A1683_010B7_GB7_01_13433.mzXML	TRUE	2007-02-28	marine metagenome	GAZ:Panama	A1683_010B7_GB7_01_13433.mzXML	0	PAG28FEB07.4 Lyngbya sp.	FALSE	0	ENVO:marine biome	ENVO:sea water	ENVO:organic material	Lyngbya sp.	Crude	TRUE	TRUE	Lyngbya sp.	cyanobacteria	A1683.010B7.GB7.01.13433	1117	8.12737	-82.3103	UCSD	UCSDMI	TRUE	FALSE	completed	UCSD	cyanobacteria	408172	Cyanobacteria	PAG
10125.A1683.010B8.GB8.01.13434.mzXML	0	A1683_010B8_GB8_01_13434.mzXML	TRUE	2007-02-28	marine metagenome	GAZ:Panama	A1683_010B8_GB8_01_13434.mzXML	0	PAG28FEB07.4 Lyngbya sp.	FALSE	0	ENVO:marine biome	ENVO:sea water	ENVO:organic material	Lyngbya sp.	A	TRUE	TRUE	Lyngbya sp.	cyanobacteria	A1683.010B8.GB8.01.13434	1117	8.12737	-82.3103	UCSD	UCSDMI	TRUE	FALSE	completed	UCSD	cyanobacteria	408172	Cyanobacteria	PAG
10125.A1683.010B9.GB9.01.13435.mzXML	0	A1683_010B9_GB9_01_13435.mzXML	TRUE	2007-02-28	marine metagenome	GAZ:Panama	A1683_010B9_GB9_01_13435.mzXML	0	PAG28FEB07.4 Lyngbya sp.	FALSE	0	ENVO:marine biome	ENVO:sea water	ENVO:organic material	Lyngbya sp.	B	TRUE	TRUE	Lyngbya sp.	cyanobacteria	A1683.010B9.GB9.01.13435	1117	8.12737	-82.3103	UCSD	UCSDMI	TRUE	FALSE	completed	UCSD	cyanobacteria	408172	Cyanobacteria	PAG
10125.A1683.010C1.GC1.01.13438.mzXML	0	A1683_010C1_GC1_01_13438.mzXML	TRUE	2007-02-28	marine metagenome	GAZ:Panama	A1683_010C1_GC1_01_13438.mzXML	0	PAG28FEB07.4 Lyngbya sp.	FALSE	0	ENVO:marine biome	ENVO:sea water	ENVO:organic material	Lyngbya sp.	E	TRUE	TRUE	Lyngbya sp.	cyanobacteria	A1683.010C1.GC1.01.13438	1117	8.12737	-82.3103	UCSD	UCSDMI	TRUE	FALSE	completed	UCSD	cyanobacteria	408172	Cyanobacteria	PAG
10125.A1683.010C2.GC2.01.13439.mzXML	0	A1683_010C2_GC2_01_13439.mzXML	TRUE	2007-02-28	marine metagenome	GAZ:Panama	A1683_010C2_GC2_01_13439.mzXML	0	PAG28FEB07.4 Lyngbya sp.	FALSE	0	ENVO:marine biome	ENVO:sea water	ENVO:organic material	Lyngbya sp.	F	TRUE	TRUE	Lyngbya sp.	cyanobacteria	A1683.010C2.GC2.01.13439	1117	8.12737	-82.3103	UCSD	UCSDMI	TRUE	FALSE	completed	UCSD	cyanobacteria	408172	Cyanobacteria	PAG
10125.A1683.010C3.GC3.01.13440.mzXML	0	A1683_010C3_GC3_01_13440.mzXML	TRUE	2007-02-28	marine metagenome	GAZ:Panama	A1683_010C3_GC3_01_13440.mzXML	0	PAG28FEB07.4 Lyngbya sp.	FALSE	0	ENVO:marine biome	ENVO:sea water	ENVO:organic material	Lyngbya sp.	G	TRUE	TRUE	Lyngbya sp.	cyanobacteria	A1683.010C3.GC3.01.13440	1117	8.12737	-82.3103	UCSD	UCSDMI	TRUE	FALSE	completed	UCSD	cyanobacteria	408172	Cyanobacteria	PAG
10125.A1683.010C4.GC4.01.13441.mzXML	0	A1683_010C4_GC4_01_13441.mzXML	TRUE	2007-02-28	marine metagenome	GAZ:Panama	A1683_010C4_GC4_01_13441.mzXML	0	PAG28FEB07.4 Lyngbya sp.	FALSE	0	ENVO:marine biome	ENVO:sea water	ENVO:organic material	Lyngbya sp.	I	TRUE	TRUE	Lyngbya sp.	cyanobacteria	A1683.010C4.GC4.01.13441	1117	8.12737	-82.3103	UCSD	UCSDMI	TRUE	FALSE	completed	UCSD	cyanobacteria	408172	Cyanobacteria	PAG
10125.A1684.010C10.GC10.01.13448.mzXML	0	A1684_010C10_GC10_01_13448.mzXML	TRUE	2007-03-05	marine metagenome	GAZ:Panama	A1684_010C10_GC10_01_13448.mzXML	0	PAG5MAR07.2 woolly symploca	FALSE	0	ENVO:marine biome	ENVO:sea water	ENVO:organic material	woolly symploca	E	TRUE	TRUE	woolly symploca	cyanobacteria	A1684.010C10.GC10.01.13448	1117	9.36235	-82.7385	UCSD	UCSDMI	TRUE	FALSE	completed	UCSD	cyanobacteria	408172	Cyanobacteria	PAG
10125.A1684.010C11.GC11.01.13449.mzXML	0	A1684_010C11_GC11_01_13449.mzXML	TRUE	2007-03-05	marine metagenome	GAZ:Panama	A1684_010C11_GC11_01_13449.mzXML	0	PAG5MAR07.2 woolly symploca	FALSE	0	ENVO:marine biome	ENVO:sea water	ENVO:organic material	woolly symploca	I	TRUE	TRUE	woolly symploca	cyanobacteria	A1684.010C11.GC11.01.13449	1117	9.36235	-82.7385	UCSD	UCSDMI	TRUE	FALSE	completed	UCSD	cyanobacteria	408172	Cyanobacteria	PAG
10125.A1684.010C5.GC5.01.13443.mzXML	0	A1684_010C5_GC5_01_13443.mzXML	TRUE	2007-03-05	marine metagenome	GAZ:Panama	A1684_010C5_GC5_01_13443.mzXML	0	PAG5MAR07.2 woolly symploca	FALSE	0	ENVO:marine biome	ENVO:sea water	ENVO:organic material	woolly symploca	Crude	TRUE	TRUE	woolly symploca	cyanobacteria	A1684.010C5.GC5.01.13443	1117	9.36235	-82.7385	UCSD	UCSDMI	TRUE	FALSE	completed	UCSD	cyanobacteria	408172	Cyanobacteria	PAG
10125.A1684.010C6.GC6.01.13444.mzXML	0	A1684_010C6_GC6_01_13444.mzXML	TRUE	2007-03-05	marine metagenome	GAZ:Panama	A1684_010C6_GC6_01_13444.mzXML	0	PAG5MAR07.2 woolly symploca	FALSE	0	ENVO:marine biome	ENVO:sea water	ENVO:organic material	woolly symploca	A	TRUE	TRUE	woolly symploca	cyanobacteria	A1684.010C6.GC6.01.13444	1117	9.36235	-82.7385	UCSD	UCSDMI	TRUE	FALSE	completed	UCSD	cyanobacteria	408172	Cyanobacteria	PAG
10125.A1684.010C7.GC7.01.13445.mzXML	0	A1684_010C7_GC7_01_13445.mzXML	TRUE	2007-03-05	marine metagenome	GAZ:Panama	A1684_010C7_GC7_01_13445.mzXML	0	PAG5MAR07.2 woolly symploca	FALSE	0	ENVO:marine biome	ENVO:sea water	ENVO:organic material	woolly symploca	B	TRUE	TRUE	woolly symploca	cyanobacteria	A1684.010C7.GC7.01.13445	1117	9.36235	-82.7385	UCSD	UCSDMI	TRUE	FALSE	completed	UCSD	cyanobacteria	408172	Cyanobacteria	PAG
10125.A1684.010C8.GC8.01.13446.mzXML	0	A1684_010C8_GC8_01_13446.mzXML	TRUE	2007-03-05	marine metagenome	GAZ:Panama	A1684_010C8_GC8_01_13446.mzXML	0	PAG5MAR07.2 woolly symploca	FALSE	0	ENVO:marine biome	ENVO:sea water	ENVO:organic material	woolly symploca	C	TRUE	TRUE	woolly symploca	cyanobacteria	A1684.010C8.GC8.01.13446	1117	9.36235	-82.7385	UCSD	UCSDMI	TRUE	FALSE	completed	UCSD	cyanobacteria	408172	Cyanobacteria	PAG
10125.A1684.010C9.GC9.01.13447.mzXML	0	A1684_010C9_GC9_01_13447.mzXML	TRUE	2007-03-05	marine metagenome	GAZ:Panama	A1684_010C9_GC9_01_13447.mzXML	0	PAG5MAR07.2 woolly symploca	FALSE	0	ENVO:marine biome	ENVO:sea water	ENVO:organic material	woolly symploca	D	TRUE	TRUE	woolly symploca	cyanobacteria	A1684.010C9.GC9.01.13447	1117	9.36235	-82.7385	UCSD	UCSDMI	TRUE	FALSE	completed	UCSD	cyanobacteria	408172	Cyanobacteria	PAG
10125.A1685.010D1.GD1.01.13451.mzXML	0	A1685_010D1_GD1_01_13451.mzXML	TRUE	2007-03-05	marine metagenome	GAZ:Panama	A1685_010D1_GD1_01_13451.mzXML	0	PAG5MAR07.3 white lyngbya	FALSE	0	ENVO:marine biome	ENVO:sea water	ENVO:organic material	white lyngbya	Crude	TRUE	TRUE	white lyngbya	cyanobacteria	A1685.010D1.GD1.01.13451	1117	9.36235	-82.7385	UCSD	UCSDMI	TRUE	FALSE	completed	UCSD	cyanobacteria	408172	Cyanobacteria	PAG
10125.A1685.010D2.GD2.01.13452.mzXML	0	A1685_010D2_GD2_01_13452.mzXML	TRUE	2007-03-05	marine metagenome	GAZ:Panama	A1685_010D2_GD2_01_13452.mzXML	0	PAG5MAR07.3 white lyngbya	FALSE	0	ENVO:marine biome	ENVO:sea water	ENVO:organic material	white lyngbya	A	TRUE	TRUE	white lyngbya	cyanobacteria	A1685.010D2.GD2.01.13452	1117	9.36235	-82.7385	UCSD	UCSDMI	TRUE	FALSE	completed	UCSD	cyanobacteria	408172	Cyanobacteria	PAG
10125.A1685.010D3.GD3.01.13453.mzXML	0	A1685_010D3_GD3_01_13453.mzXML	TRUE	2007-03-05	marine metagenome	GAZ:Panama	A1685_010D3_GD3_01_13453.mzXML	0	PAG5MAR07.3 white lyngbya	FALSE	0	ENVO:marine biome	ENVO:sea water	ENVO:organic material	white lyngbya	B	TRUE	TRUE	white lyngbya	cyanobacteria	A1685.010D3.GD3.01.13453	1117	9.36235	-82.7385	UCSD	UCSDMI	TRUE	FALSE	completed	UCSD	cyanobacteria	408172	Cyanobacteria	PAG
10125.A1685.010D4.GD4.01.13454.mzXML	0	A1685_010D4_GD4_01_13454.mzXML	TRUE	2007-03-05	marine metagenome	GAZ:Panama	A1685_010D4_GD4_01_13454.mzXML	0	PAG5MAR07.3 white lyngbya	FALSE	0	ENVO:marine biome	ENVO:sea water	ENVO:organic material	white lyngbya	C	TRUE	TRUE	white lyngbya	cyanobacteria	A1685.010D4.GD4.01.13454	1117	9.36235	-82.7385	UCSD	UCSDMI	TRUE	FALSE	completed	UCSD	cyanobacteria	408172	Cyanobacteria	PAG
10125.A1685.010D5.GD5.01.13455.mzXML	0	A1685_010D5_GD5_01_13455.mzXML	TRUE	2007-03-05	marine metagenome	GAZ:Panama	A1685_010D5_GD5_01_13455.mzXML	0	PAG5MAR07.3 white lyngbya	FALSE	0	ENVO:marine biome	ENVO:sea water	ENVO:organic material	white lyngbya	D	TRUE	TRUE	white lyngbya	cyanobacteria	A1685.010D5.GD5.01.13455	1117	9.36235	-82.7385	UCSD	UCSDMI	TRUE	FALSE	completed	UCSD	cyanobacteria	408172	Cyanobacteria	PAG
10125.A1685.010D6.GD6.01.13456.mzXML	0	A1685_010D6_GD6_01_13456.mzXML	TRUE	2007-03-05	marine metagenome	GAZ:Panama	A1685_010D6_GD6_01_13456.mzXML	0	PAG5MAR07.3 white lyngbya	FALSE	0	ENVO:marine biome	ENVO:sea water	ENVO:organic material	white lyngbya	E	TRUE	TRUE	white lyngbya	cyanobacteria	A1685.010D6.GD6.01.13456	1117	9.36235	-82.7385	UCSD	UCSDMI	TRUE	FALSE	completed	UCSD	cyanobacteria	408172	Cyanobacteria	PAG
10125.A1685.010D7.GD7.01.13457.mzXML	0	A1685_010D7_GD7_01_13457.mzXML	TRUE	2007-03-05	marine metagenome	GAZ:Panama	A1685_010D7_GD7_01_13457.mzXML	0	PAG5MAR07.3 white lyngbya	FALSE	0	ENVO:marine biome	ENVO:sea water	ENVO:organic material	white lyngbya	F	TRUE	TRUE	white lyngbya	cyanobacteria	A1685.010D7.GD7.01.13457	1117	9.36235	-82.7385	UCSD	UCSDMI	TRUE	FALSE	completed	UCSD	cyanobacteria	408172	Cyanobacteria	PAG
10125.A1685.010D8.GD8.01.13458.mzXML	0	A1685_010D8_GD8_01_13458.mzXML	TRUE	2007-03-05	marine metagenome	GAZ:Panama	A1685_010D8_GD8_01_13458.mzXML	0	PAG5MAR07.3 white lyngbya	FALSE	0	ENVO:marine biome	ENVO:sea water	ENVO:organic material	white lyngbya	G	TRUE	TRUE	white lyngbya	cyanobacteria	A1685.010D8.GD8.01.13458	1117	9.36235	-82.7385	UCSD	UCSDMI	TRUE	FALSE	completed	UCSD	cyanobacteria	408172	Cyanobacteria	PAG
10125.A1686.010D10.GD10.01.13461.mzXML	0	A1686_010D10_GD10_01_13461.mzXML	TRUE	2007-03-05	marine metagenome	GAZ:Panama	A1686_010D10_GD10_01_13461.mzXML	0	PAG5MAR07.1 black lyngbya	FALSE	0	ENVO:marine biome	ENVO:sea water	ENVO:organic material	black lyngbya	A	TRUE	TRUE	black lyngbya	cyanobacteria	A1686.010D10.GD10.01.13461	1117	9.36235	-82.7385	UCSD	UCSDMI	TRUE	FALSE	completed	UCSD	cyanobacteria	408172	Cyanobacteria	PAG
10125.A1686.010D11.GD11.01.13462.mzXML	0	A1686_010D11_GD11_01_13462.mzXML	TRUE	2007-03-05	marine metagenome	GAZ:Panama	A1686_010D11_GD11_01_13462.mzXML	0	PAG5MAR07.1 black lyngbya	FALSE	0	ENVO:marine biome	ENVO:sea water	ENVO:organic material	black lyngbya	B	TRUE	TRUE	black lyngbya	cyanobacteria	A1686.010D11.GD11.01.13462	1117	9.36235	-82.7385	UCSD	UCSDMI	TRUE	FALSE	completed	UCSD	cyanobacteria	408172	Cyanobacteria	PAG
10125.A1686.010D9.GD9.01.13460.mzXML	0	A1686_010D9_GD9_01_13460.mzXML	TRUE	2007-03-05	marine metagenome	GAZ:Panama	A1686_010D9_GD9_01_13460.mzXML	0	PAG5MAR07.1 black lyngbya	FALSE	0	ENVO:marine biome	ENVO:sea water	ENVO:organic material	black lyngbya	Crude	TRUE	TRUE	black lyngbya	cyanobacteria	A1686.010D9.GD9.01.13460	1117	9.36235	-82.7385	UCSD	UCSDMI	TRUE	FALSE	completed	UCSD	cyanobacteria	408172	Cyanobacteria	PAG
10125.A1686.010E1.GE1.01.13463.mzXML	0	A1686_010E1_GE1_01_13463.mzXML	TRUE	2007-03-05	marine metagenome	GAZ:Panama	A1686_010E1_GE1_01_13463.mzXML	0	PAG5MAR07.1 black lyngbya	FALSE	0	ENVO:marine biome	ENVO:sea water	ENVO:organic material	black lyngbya	C	TRUE	TRUE	black lyngbya	cyanobacteria	A1686.010E1.GE1.01.13463	1117	9.36235	-82.7385	UCSD	UCSDMI	TRUE	FALSE	completed	UCSD	cyanobacteria	408172	Cyanobacteria	PAG
10125.A1686.010E2.GE2.01.13464.mzXML	0	A1686_010E2_GE2_01_13464.mzXML	TRUE	2007-03-05	marine metagenome	GAZ:Panama	A1686_010E2_GE2_01_13464.mzXML	0	PAG5MAR07.1 black lyngbya	FALSE	0	ENVO:marine biome	ENVO:sea water	ENVO:organic material	black lyngbya	D	TRUE	TRUE	black lyngbya	cyanobacteria	A1686.010E2.GE2.01.13464	1117	9.36235	-82.7385	UCSD	UCSDMI	TRUE	FALSE	completed	UCSD	cyanobacteria	408172	Cyanobacteria	PAG
10125.A1686.010E3.GE3.01.13465.mzXML	0	A1686_010E3_GE3_01_13465.mzXML	TRUE	2007-03-05	marine metagenome	GAZ:Panama	A1686_010E3_GE3_01_13465.mzXML	0	PAG5MAR07.1 black lyngbya	FALSE	0	ENVO:marine biome	ENVO:sea water	ENVO:organic material	black lyngbya	E	TRUE	TRUE	black lyngbya	cyanobacteria	A1686.010E3.GE3.01.13465	1117	9.36235	-82.7385	UCSD	UCSDMI	TRUE	FALSE	completed	UCSD	cyanobacteria	408172	Cyanobacteria	PAG
10125.A1686.010E4.GE4.01.13466.mzXML	0	A1686_010E4_GE4_01_13466.mzXML	TRUE	2007-03-05	marine metagenome	GAZ:Panama	A1686_010E4_GE4_01_13466.mzXML	0	PAG5MAR07.1 black lyngbya	FALSE	0	ENVO:marine biome	ENVO:sea water	ENVO:organic material	black lyngbya	F	TRUE	TRUE	black lyngbya	cyanobacteria	A1686.010E4.GE4.01.13466	1117	9.36235	-82.7385	UCSD	UCSDMI	TRUE	FALSE	completed	UCSD	cyanobacteria	408172	Cyanobacteria	PAG
10125.A1686.010E5.GE5.01.13467.mzXML	0	A1686_010E5_GE5_01_13467.mzXML	TRUE	2007-03-05	marine metagenome	GAZ:Panama	A1686_010E5_GE5_01_13467.mzXML	0	PAG5MAR07.1 black lyngbya	FALSE	0	ENVO:marine biome	ENVO:sea water	ENVO:organic material	black lyngbya	G	TRUE	TRUE	black lyngbya	cyanobacteria	A1686.010E5.GE5.01.13467	1117	9.36235	-82.7385	UCSD	UCSDMI	TRUE	FALSE	completed	UCSD	cyanobacteria	408172	Cyanobacteria	PAG
10125.A1686.010E6.GE6.01.13468.mzXML	0	A1686_010E6_GE6_01_13468.mzXML	TRUE	2007-03-05	marine metagenome	GAZ:Panama	A1686_010E6_GE6_01_13468.mzXML	0	PAG5MAR07.1 black lyngbya	FALSE	0	ENVO:marine biome	ENVO:sea water	ENVO:organic material	black lyngbya	I	TRUE	TRUE	black lyngbya	cyanobacteria	A1686.010E6.GE6.01.13468	1117	9.36235	-82.7385	UCSD	UCSDMI	TRUE	FALSE	completed	UCSD	cyanobacteria	408172	Cyanobacteria	PAG
10125.A1717.011D1.RD1.01.13656.mzXML	0	A1717_011D1_RD1_01_13656.mzXML	TRUE	2007-02-28	marine metagenome	GAZ:Panama	A1717_011D1_RD1_01_13656.mzXML	0	PAG28FEB07.1 Homothannion	FALSE	0	ENVO:marine biome	ENVO:sea water	ENVO:organic material	Homothannion	A	TRUE	TRUE	Homothannion	cyanobacteria	A1717.011D1.RD1.01.13656	1117	8.12737	-82.3103	UCSD	UCSDMI	TRUE	FALSE	completed	UCSD	cyanobacteria	408172	Cyanobacteria	PAG
10125.A1717.011D2.RD2.01.13657.mzXML	0	A1717_011D2_RD2_01_13657.mzXML	TRUE	2007-02-28	marine metagenome	GAZ:Panama	A1717_011D2_RD2_01_13657.mzXML	0	PAG28FEB07.1 Homothannion	FALSE	0	ENVO:marine biome	ENVO:sea water	ENVO:organic material	Homothannion	B	TRUE	TRUE	Homothannion	cyanobacteria	A1717.011D2.RD2.01.13657	1117	8.12737	-82.3103	UCSD	UCSDMI	TRUE	FALSE	completed	UCSD	cyanobacteria	408172	Cyanobacteria	PAG
10125.A1717.011D3.RD3.01.13658.mzXML	0	A1717_011D3_RD3_01_13658.mzXML	TRUE	2007-02-28	marine metagenome	GAZ:Panama	A1717_011D3_RD3_01_13658.mzXML	0	PAG28FEB07.1 Homothannion	FALSE	0	ENVO:marine biome	ENVO:sea water	ENVO:organic material	Homothannion	C	TRUE	TRUE	Homothannion	cyanobacteria	A1717.011D3.RD3.01.13658	1117	8.12737	-82.3103	UCSD	UCSDMI	TRUE	FALSE	completed	UCSD	cyanobacteria	408172	Cyanobacteria	PAG
10125.1638.008C10.GC10.01.15619.mzXML	0	1638_008C10_GC10_01_15619.mzXML	TRUE	2007-03-01	marine metagenome	GAZ:Panama Gulf of Chiriqui	1638_008C10_GC10_01_15619.mzXML	0	PAG1MAR07.1 Lyngbya sp.	FALSE	0	ENVO:marine biome	ENVO:sea water	ENVO:organic material	Lyngbya sp.	B	TRUE	TRUE	Lyngbya sp.	cyanobacteria	1638.008C10.GC10.01.15619	1117	8.12737	-82.3103	UCSD	UCSDMI	TRUE	FALSE	completed	UCSD	cyanobacteria	408172	Cyanobacteria	PAG
10125.1638.008C11.GC11.01.15620.mzXML	0	1638_008C11_GC11_01_15620.mzXML	TRUE	2007-03-01	marine metagenome	GAZ:Panama Gulf of Chiriqui	1638_008C11_GC11_01_15620.mzXML	0	PAG1MAR07.1 Lyngbya sp.	FALSE	0	ENVO:marine biome	ENVO:sea water	ENVO:organic material	Lyngbya sp.	C	TRUE	TRUE	Lyngbya sp.	cyanobacteria	1638.008C11.GC11.01.15620	1117	8.12737	-82.3103	UCSD	UCSDMI	TRUE	FALSE	completed	UCSD	cyanobacteria	408172	Cyanobacteria	PAG
10125.1638.008C8.GC8.01.15616.mzXML	0	1638_008C8_GC8_01_15616.mzXML	TRUE	2007-03-01	marine metagenome	GAZ:Panama Gulf of Chiriqui	1638_008C8_GC8_01_15616.mzXML	0	PAG1MAR07.1 Lyngbya sp.	FALSE	0	ENVO:marine biome	ENVO:sea water	ENVO:organic material	Lyngbya sp.	Crude	TRUE	TRUE	Lyngbya sp.	cyanobacteria	1638.008C8.GC8.01.15616	1117	8.12737	-82.3103	UCSD	UCSDMI	TRUE	FALSE	completed	UCSD	cyanobacteria	408172	Cyanobacteria	PAG
10125.1638.008C9.GC9.01.15617.mzXML	0	1638_008C9_GC9_01_15617.mzXML	TRUE	2007-03-01	marine metagenome	GAZ:Panama Gulf of Chiriqui	1638_008C9_GC9_01_15617.mzXML	0	PAG1MAR07.1 Lyngbya sp.	FALSE	0	ENVO:marine biome	ENVO:sea water	ENVO:organic material	Lyngbya sp.	A	TRUE	TRUE	Lyngbya sp.	cyanobacteria	1638.008C9.GC9.01.15617	1117	8.12737	-82.3103	UCSD	UCSDMI	TRUE	FALSE	completed	UCSD	cyanobacteria	408172	Cyanobacteria	PAG
10125.1638.008D1.GD1.01.15621.mzXML	0	1638_008D1_GD1_01_15621.mzXML	TRUE	2007-03-01	marine metagenome	GAZ:Panama Gulf of Chiriqui	1638_008D1_GD1_01_15621.mzXML	0	PAG1MAR07.1 Lyngbya sp.	FALSE	0	ENVO:marine biome	ENVO:sea water	ENVO:organic material	Lyngbya sp.	D	TRUE	TRUE	Lyngbya sp.	cyanobacteria	1638.008D1.GD1.01.15621	1117	8.12737	-82.3103	UCSD	UCSDMI	TRUE	FALSE	completed	UCSD	cyanobacteria	408172	Cyanobacteria	PAG
10125.1638.008D2.GD2.01.15622.mzXML	0	1638_008D2_GD2_01_15622.mzXML	TRUE	2007-03-01	marine metagenome	GAZ:Panama Gulf of Chiriqui	1638_008D2_GD2_01_15622.mzXML	0	PAG1MAR07.1 Lyngbya sp.	FALSE	0	ENVO:marine biome	ENVO:sea water	ENVO:organic material	Lyngbya sp.	I	TRUE	TRUE	Lyngbya sp.	cyanobacteria	1638.008D2.GD2.01.15622	1117	8.12737	-82.3103	UCSD	UCSDMI	TRUE	FALSE	completed	UCSD	cyanobacteria	408172	Cyanobacteria	PAG
10125.1926.026B10.GB10.01.15081.mzXML	0	1926_026B10_GB10_01_15081.mzXML	TRUE	2009-08-12	marine metagenome	GAZ:United States of America:Palmyra Atoll	1926_026B10_GB10_01_15081.mzXML	0	PAL12AUG09.2 Terrestrial algae	FALSE	0	ENVO:marine biome	ENVO:sea water	ENVO:organic material	Terrestrial algae	D	TRUE	TRUE	Terrestrial algae	Terrestrial algae	1926.026B10.GB10.01.15081	1117	5.87731	-162.074	UCSD	UCSDMI	TRUE	FALSE	completed	UCSD	cyanobacteria	408172	Cyanobacteria	PAL
10125.1926.026B11.GB11.01.15082.mzXML	0	1926_026B11_GB11_01_15082.mzXML	TRUE	2009-08-12	marine metagenome	GAZ:United States of America:Palmyra Atoll	1926_026B11_GB11_01_15082.mzXML	0	PAL12AUG09.2 Terrestrial algae	FALSE	0	ENVO:marine biome	ENVO:sea water	ENVO:organic material	Terrestrial algae	E	TRUE	TRUE	Terrestrial algae	Terrestrial algae	1926.026B11.GB11.01.15082	1117	5.87731	-162.074	UCSD	UCSDMI	TRUE	FALSE	completed	UCSD	cyanobacteria	408172	Cyanobacteria	PAL
10125.1926.026B6.GB6.01.15077.mzXML	0	1926_026B6_GB6_01_15077.mzXML	TRUE	2009-08-12	marine metagenome	GAZ:United States of America:Palmyra Atoll	1926_026B6_GB6_01_15077.mzXML	0	PAL12AUG09.2 Terrestrial algae	FALSE	0	ENVO:marine biome	ENVO:sea water	ENVO:organic material	Terrestrial algae	Crude	TRUE	TRUE	Terrestrial algae	Terrestrial algae	1926.026B6.GB6.01.15077	1117	5.87731	-162.074	UCSD	UCSDMI	TRUE	FALSE	completed	UCSD	cyanobacteria	408172	Cyanobacteria	PAL
10125.1926.026B7.GB7.01.15078.mzXML	0	1926_026B7_GB7_01_15078.mzXML	TRUE	2009-08-12	marine metagenome	GAZ:United States of America:Palmyra Atoll	1926_026B7_GB7_01_15078.mzXML	0	PAL12AUG09.2 Terrestrial algae	FALSE	0	ENVO:marine biome	ENVO:sea water	ENVO:organic material	Terrestrial algae	A	TRUE	TRUE	Terrestrial algae	Terrestrial algae	1926.026B7.GB7.01.15078	1117	5.87731	-162.074	UCSD	UCSDMI	TRUE	FALSE	completed	UCSD	cyanobacteria	408172	Cyanobacteria	PAL
10125.1926.026B8.GB8.01.15079.mzXML	0	1926_026B8_GB8_01_15079.mzXML	TRUE	2009-08-12	marine metagenome	GAZ:United States of America:Palmyra Atoll	1926_026B8_GB8_01_15079.mzXML	0	PAL12AUG09.2 Terrestrial algae	FALSE	0	ENVO:marine biome	ENVO:sea water	ENVO:organic material	Terrestrial algae	B	TRUE	TRUE	Terrestrial algae	Terrestrial algae	1926.026B8.GB8.01.15079	1117	5.87731	-162.074	UCSD	UCSDMI	TRUE	FALSE	completed	UCSD	cyanobacteria	408172	Cyanobacteria	PAL
10125.1926.026B9.GB9.01.15080.mzXML	0	1926_026B9_GB9_01_15080.mzXML	TRUE	2009-08-12	marine metagenome	GAZ:United States of America:Palmyra Atoll	1926_026B9_GB9_01_15080.mzXML	0	PAL12AUG09.2 Terrestrial algae	FALSE	0	ENVO:marine biome	ENVO:sea water	ENVO:organic material	Terrestrial algae	C	TRUE	TRUE	Terrestrial algae	Terrestrial algae	1926.026B9.GB9.01.15080	1117	5.87731	-162.074	UCSD	UCSDMI	TRUE	FALSE	completed	UCSD	cyanobacteria	408172	Cyanobacteria	PAL
10125.1926.026C1.GC1.01.15083.mzXML	0	1926_026C1_GC1_01_15083.mzXML	TRUE	2009-08-12	marine metagenome	GAZ:United States of America:Palmyra Atoll	1926_026C1_GC1_01_15083.mzXML	0	PAL12AUG09.2 Terrestrial algae	FALSE	0	ENVO:marine biome	ENVO:sea water	ENVO:organic material	Terrestrial algae	F	TRUE	TRUE	Terrestrial algae	Terrestrial algae	1926.026C1.GC1.01.15083	1117	5.87731	-162.074	UCSD	UCSDMI	TRUE	FALSE	completed	UCSD	cyanobacteria	408172	Cyanobacteria	PAL
10125.1926.026C2.GC2.01.15084.mzXML	0	1926_026C2_GC2_01_15084.mzXML	TRUE	2009-08-12	marine metagenome	GAZ:United States of America:Palmyra Atoll	1926_026C2_GC2_01_15084.mzXML	0	PAL12AUG09.2 Terrestrial algae	FALSE	0	ENVO:marine biome	ENVO:sea water	ENVO:organic material	Terrestrial algae	G	TRUE	TRUE	Terrestrial algae	Terrestrial algae	1926.026C2.GC2.01.15084	1117	5.87731	-162.074	UCSD	UCSDMI	TRUE	FALSE	completed	UCSD	cyanobacteria	408172	Cyanobacteria	PAL
10125.1926.026C3.GC3.01.15085.mzXML	0	1926_026C3_GC3_01_15085.mzXML	TRUE	2009-08-12	marine metagenome	GAZ:United States of America:Palmyra Atoll	1926_026C3_GC3_01_15085.mzXML	0	PAL12AUG09.2 Terrestrial algae	FALSE	0	ENVO:marine biome	ENVO:sea water	ENVO:organic material	Terrestrial algae	H	TRUE	TRUE	Terrestrial algae	Terrestrial algae	1926.026C3.GC3.01.15085	1117	5.87731	-162.074	UCSD	UCSDMI	TRUE	FALSE	completed	UCSD	cyanobacteria	408172	Cyanobacteria	PAL
10125.1926.026C4.GC4.01.15086.mzXML	0	1926_026C4_GC4_01_15086.mzXML	TRUE	2009-08-12	marine metagenome	GAZ:United States of America:Palmyra Atoll	1926_026C4_GC4_01_15086.mzXML	0	PAL12AUG09.2 Terrestrial algae	FALSE	0	ENVO:marine biome	ENVO:sea water	ENVO:organic material	Terrestrial algae	I	TRUE	TRUE	Terrestrial algae	Terrestrial algae	1926.026C4.GC4.01.15086	1117	5.87731	-162.074	UCSD	UCSDMI	TRUE	FALSE	completed	UCSD	cyanobacteria	408172	Cyanobacteria	PAL
10125.1931.026F10.GF10.01.15129.mzXML	0	1931_026F10_GF10_01_15129.mzXML	TRUE	2009-08-07	marine metagenome	GAZ:United States of America:Palmyra Atoll	1931_026F10_GF10_01_15129.mzXML	0	PAL7AUG09.2 Green algae	FALSE	0	ENVO:marine biome	ENVO:sea water	ENVO:organic material	Green algae	I	TRUE	TRUE	Green algae	green algae	1931.026F10.GF10.01.15129	3041	5.86825	-162.092	UCSD	UCSDMI	TRUE	FALSE	completed	UCSD	cyanobacteria	408172	Cyanobacteria	PAL
10125.1931.026F3.GF3.01.15121.mzXML	0	1931_026F3_GF3_01_15121.mzXML	TRUE	2009-08-07	marine metagenome	GAZ:United States of America:Palmyra Atoll	1931_026F3_GF3_01_15121.mzXML	0	PAL7AUG09.2 Green algae	FALSE	0	ENVO:marine biome	ENVO:sea water	ENVO:organic material	Green algae	Crude	TRUE	TRUE	Green algae	green algae	1931.026F3.GF3.01.15121	3041	5.86825	-162.092	UCSD	UCSDMI	TRUE	FALSE	completed	UCSD	cyanobacteria	408172	Cyanobacteria	PAL
10125.1931.026F4.GF4.01.15122.mzXML	0	1931_026F4_GF4_01_15122.mzXML	TRUE	2009-08-07	marine metagenome	GAZ:United States of America:Palmyra Atoll	1931_026F4_GF4_01_15122.mzXML	0	PAL7AUG09.2 Green algae	FALSE	0	ENVO:marine biome	ENVO:sea water	ENVO:organic material	Green algae	A	TRUE	TRUE	Green algae	green algae	1931.026F4.GF4.01.15122	3041	5.86825	-162.092	UCSD	UCSDMI	TRUE	FALSE	completed	UCSD	cyanobacteria	408172	Cyanobacteria	PAL
10125.1931.026F5.GF5.01.15123.mzXML	0	1931_026F5_GF5_01_15123.mzXML	TRUE	2009-08-07	marine metagenome	GAZ:United States of America:Palmyra Atoll	1931_026F5_GF5_01_15123.mzXML	0	PAL7AUG09.2 Green algae	FALSE	0	ENVO:marine biome	ENVO:sea water	ENVO:organic material	Green algae	B	TRUE	TRUE	Green algae	green algae	1931.026F5.GF5.01.15123	3041	5.86825	-162.092	UCSD	UCSDMI	TRUE	FALSE	completed	UCSD	cyanobacteria	408172	Cyanobacteria	PAL
10125.1931.026F6.GF6.01.15124.mzXML	0	1931_026F6_GF6_01_15124.mzXML	TRUE	2009-08-07	marine metagenome	GAZ:United States of America:Palmyra Atoll	1931_026F6_GF6_01_15124.mzXML	0	PAL7AUG09.2 Green algae	FALSE	0	ENVO:marine biome	ENVO:sea water	ENVO:organic material	Green algae	C	TRUE	TRUE	Green algae	green algae	1931.026F6.GF6.01.15124	3041	5.86825	-162.092	UCSD	UCSDMI	TRUE	FALSE	completed	UCSD	cyanobacteria	408172	Cyanobacteria	PAL
10125.1931.026F7.GF7.01.15126.mzXML	0	1931_026F7_GF7_01_15126.mzXML	TRUE	2009-08-07	marine metagenome	GAZ:United States of America:Palmyra Atoll	1931_026F7_GF7_01_15126.mzXML	0	PAL7AUG09.2 Green algae	FALSE	0	ENVO:marine biome	ENVO:sea water	ENVO:organic material	Green algae	E	TRUE	TRUE	Green algae	green algae	1931.026F7.GF7.01.15126	3041	5.86825	-162.092	UCSD	UCSDMI	TRUE	FALSE	completed	UCSD	cyanobacteria	408172	Cyanobacteria	PAL
10125.1931.026F8.GF8.01.15127.mzXML	0	1931_026F8_GF8_01_15127.mzXML	TRUE	2009-08-07	marine metagenome	GAZ:United States of America:Palmyra Atoll	1931_026F8_GF8_01_15127.mzXML	0	PAL7AUG09.2 Green algae	FALSE	0	ENVO:marine biome	ENVO:sea water	ENVO:organic material	Green algae	F	TRUE	TRUE	Green algae	green algae	1931.026F8.GF8.01.15127	3041	5.86825	-162.092	UCSD	UCSDMI	TRUE	FALSE	completed	UCSD	cyanobacteria	408172	Cyanobacteria	PAL
10125.1931.026F9.GF9.01.15128.mzXML	0	1931_026F9_GF9_01_15128.mzXML	TRUE	2009-08-07	marine metagenome	GAZ:United States of America:Palmyra Atoll	1931_026F9_GF9_01_15128.mzXML	0	PAL7AUG09.2 Green algae	FALSE	0	ENVO:marine biome	ENVO:sea water	ENVO:organic material	Green algae	H	TRUE	TRUE	Green algae	green algae	1931.026F9.GF9.01.15128	3041	5.86825	-162.092	UCSD	UCSDMI	TRUE	FALSE	completed	UCSD	cyanobacteria	408172	Cyanobacteria	PAL
10125.1938.027A10.RA10.01.15169.mzXML	0	1938_027A10_RA10_01_15169.mzXML	TRUE	2009-08-04	marine metagenome	GAZ:United States of America:Palmyra Atoll	1938_027A10_RA10_01_15169.mzXML	0	PAL4AUG09.2 Symploca	FALSE	0	ENVO:marine biome	ENVO:sea water	ENVO:organic material	Symploca	Crude	TRUE	TRUE	Symploca	cyanobacteria	1938.027A10.RA10.01.15169	1117	5.89718	-162.098	UCSD	UCSDMI	TRUE	FALSE	completed	UCSD	cyanobacteria	408172	Cyanobacteria	PAL
10125.1967.028E10.GE10.01.15333.mzXML	0	1967_028E10_GE10_01_15333.mzXML	TRUE	2009-08-07	marine metagenome	GAZ:United States of America:Palmyra Atoll	1967_028E10_GE10_01_15333.mzXML	0	PAL7AUG09.1 Cyanobacteria assemblage	FALSE	0	ENVO:marine biome	ENVO:sea water	ENVO:organic material	Cyanobacteria assemblage	C	TRUE	TRUE	Cyanobacteria assemblage	cyanobacteria	1967.028E10.GE10.01.15333	1117	5.86825	-162.092	UCSD	UCSDMI	TRUE	FALSE	completed	UCSD	cyanobacteria	408172	Cyanobacteria	PAL
10125.1967.028E11.GE11.01.15334.mzXML	0	1967_028E11_GE11_01_15334.mzXML	TRUE	2009-08-07	marine metagenome	GAZ:United States of America:Palmyra Atoll	1967_028E11_GE11_01_15334.mzXML	0	PAL7AUG09.1 Cyanobacteria assemblage	FALSE	0	ENVO:marine biome	ENVO:sea water	ENVO:organic material	Cyanobacteria assemblage	D	TRUE	TRUE	Cyanobacteria assemblage	cyanobacteria	1967.028E11.GE11.01.15334	1117	5.86825	-162.092	UCSD	UCSDMI	TRUE	FALSE	completed	UCSD	cyanobacteria	408172	Cyanobacteria	PAL
10125.1967.028E7.GE7.01.15328.mzXML	0	1967_028E7_GE7_01_15328.mzXML	TRUE	2009-08-07	marine metagenome	GAZ:United States of America:Palmyra Atoll	1967_028E7_GE7_01_15328.mzXML	0	PAL7AUG09.1 Cyanobacteria assemblage	FALSE	0	ENVO:marine biome	ENVO:sea water	ENVO:organic material	Cyanobacteria assemblage	Crude	TRUE	TRUE	Cyanobacteria assemblage	cyanobacteria	1967.028E7.GE7.01.15328	1117	5.86825	-162.092	UCSD	UCSDMI	TRUE	FALSE	completed	UCSD	cyanobacteria	408172	Cyanobacteria	PAL
10125.1967.028E8.2.GE8.01.15331.mzXML	0	1967_028E8_2_GE8_01_15331.mzXML	TRUE	2009-08-07	marine metagenome	GAZ:United States of America:Palmyra Atoll	1967_028E8_2_GE8_01_15331.mzXML	0	PAL7AUG09.1 Cyanobacteria assemblage	FALSE	0	ENVO:marine biome	ENVO:sea water	ENVO:organic material	Cyanobacteria assemblage	A	TRUE	TRUE	Cyanobacteria assemblage	cyanobacteria	1967.028E8.2.GE8.01.15331	1117	5.86825	-162.092	UCSD	UCSDMI	TRUE	FALSE	completed	UCSD	cyanobacteria	408172	Cyanobacteria	PAL
10125.1967.028E9.GE9.01.15332.mzXML	0	1967_028E9_GE9_01_15332.mzXML	TRUE	2009-08-07	marine metagenome	GAZ:United States of America:Palmyra Atoll	1967_028E9_GE9_01_15332.mzXML	0	PAL7AUG09.1 Cyanobacteria assemblage	FALSE	0	ENVO:marine biome	ENVO:sea water	ENVO:organic material	Cyanobacteria assemblage	B	TRUE	TRUE	Cyanobacteria assemblage	cyanobacteria	1967.028E9.GE9.01.15332	1117	5.86825	-162.092	UCSD	UCSDMI	TRUE	FALSE	completed	UCSD	cyanobacteria	408172	Cyanobacteria	PAL
10125.1986.030B1.GB1.01.15475.mzXML	0	1986_030B1_GB1_01_15475.mzXML	TRUE	2009-07-31	marine metagenome	GAZ:United States of America:Palmyra Atoll	1986_030B1_GB1_01_15475.mzXML	0	PAL31JUL09.3 Dark brown algae	FALSE	0	ENVO:marine biome	ENVO:sea water	ENVO:organic material	Dark brown algae	Crude	TRUE	TRUE	Dark brown algae	Dark brown algae	1986.030B1.GB1.01.15475	1117	32.8427	-117.258	UCSD	UCSDMI	TRUE	FALSE	completed	UCSD	cyanobacteria	408172	Cyanobacteria	PAL
10125.A1864.021H8.RH8.01.14631.mzXML	0	A1864_021H8_RH8_01_14631.mzXML	TRUE	2008-08-17	marine metagenome	GAZ:United States of America:Palmyra Atoll	A1864_021H8_RH8_01_14631.mzXML	0	PAL17AUG08.5 Green Mat Cyano	FALSE	0	ENVO:marine biome	ENVO:sea water	ENVO:organic material	Green Mat Cyano	Crude	TRUE	TRUE	Green Mat Cyano	cyanobacteria	A1864.021H8.RH8.01.14631	1117	5.87731	-162.074	UCSD	UCSDMI	TRUE	FALSE	completed	UCSD	cyanobacteria	408172	Cyanobacteria	PAL
10125.A2060.031E10.CRUDE.RE10.01.18807.mzXML	0	A2060_031E10_CRUDE_RE10_01_18807.mzXML	TRUE	2011-09-21	marine metagenome	GAZ:United States of America:Palmyra Atoll	A2060_031E10_CRUDE_RE10_01_18807.mzXML	0	PAL21SEP11.3 Lyngbya sp.	FALSE	0	ENVO:marine biome	ENVO:sea water	ENVO:organic material	Lyngbya sp.	crude	TRUE	TRUE	Lyngbya sp.	cyanobacteria	A2060.031E10.CRUDE.RE10.01.18807	1117	32.8427	-117.258	UCSD	UCSDMI	TRUE	FALSE	completed	UCSD	cyanobacteria	408172	Cyanobacteria	PAL
10125.A2060.031E11.B.RE11.01.18808.mzXML	0	A2060_031E11_B_RE11_01_18808.mzXML	TRUE	2011-09-21	marine metagenome	GAZ:United States of America:Palmyra Atoll	A2060_031E11_B_RE11_01_18808.mzXML	0	PAL21SEP11.3 Lyngbya sp.	FALSE	0	ENVO:marine biome	ENVO:sea water	ENVO:organic material	Lyngbya sp.	B	TRUE	TRUE	Lyngbya sp.	cyanobacteria	A2060.031E11.B.RE11.01.18808	1117	32.8427	-117.258	UCSD	UCSDMI	TRUE	FALSE	completed	UCSD	cyanobacteria	408172	Cyanobacteria	PAL
10125.A2060.031F1.C.RF1.01.18809.mzXML	0	A2060_031F1_C_RF1_01_18809.mzXML	TRUE	2011-09-21	marine metagenome	GAZ:United States of America:Palmyra Atoll	A2060_031F1_C_RF1_01_18809.mzXML	0	PAL21SEP11.3 Lyngbya sp.	FALSE	0	ENVO:marine biome	ENVO:sea water	ENVO:organic material	Lyngbya sp.	C	TRUE	TRUE	Lyngbya sp.	cyanobacteria	A2060.031F1.C.RF1.01.18809	1117	32.8427	-117.258	UCSD	UCSDMI	TRUE	FALSE	completed	UCSD	cyanobacteria	408172	Cyanobacteria	PAL
10125.A2060.031F2.D.RF2.01.18810.mzXML	0	A2060_031F2_D_RF2_01_18810.mzXML	TRUE	2011-09-21	marine metagenome	GAZ:United States of America:Palmyra Atoll	A2060_031F2_D_RF2_01_18810.mzXML	0	PAL21SEP11.3 Lyngbya sp.	FALSE	0	ENVO:marine biome	ENVO:sea water	ENVO:organic material	Lyngbya sp.	D	TRUE	TRUE	Lyngbya sp.	cyanobacteria	A2060.031F2.D.RF2.01.18810	1117	32.8427	-117.258	UCSD	UCSDMI	TRUE	FALSE	completed	UCSD	cyanobacteria	408172	Cyanobacteria	PAL
10125.A2060.031F3.E.RF3.01.18811.mzXML	0	A2060_031F3_E_RF3_01_18811.mzXML	TRUE	2011-09-21	marine metagenome	GAZ:United States of America:Palmyra Atoll	A2060_031F3_E_RF3_01_18811.mzXML	0	PAL21SEP11.3 Lyngbya sp.	FALSE	0	ENVO:marine biome	ENVO:sea water	ENVO:organic material	Lyngbya sp.	E	TRUE	TRUE	Lyngbya sp.	cyanobacteria	A2060.031F3.E.RF3.01.18811	1117	nan	nan	UCSD	UCSDMI	TRUE	FALSE	completed	UCSD	cyanobacteria	408172	Cyanobacteria	PAL
10125.A2060.031F4.F.RF4.01.18812.mzXML	0	A2060_031F4_F_RF4_01_18812.mzXML	TRUE	2011-09-21	marine metagenome	GAZ:United States of America:Palmyra Atoll	A2060_031F4_F_RF4_01_18812.mzXML	0	PAL21SEP11.3 Lyngbya sp.	FALSE	0	ENVO:marine biome	ENVO:sea water	ENVO:organic material	Lyngbya sp.	F	TRUE	TRUE	Lyngbya sp.	cyanobacteria	A2060.031F4.F.RF4.01.18812	1117	32.8427	-117.258	UCSD	UCSDMI	TRUE	FALSE	completed	UCSD	cyanobacteria	408172	Cyanobacteria	PAL
10125.A2060.031F5.G.RF5.01.18813.mzXML	0	A2060_031F5_G_RF5_01_18813.mzXML	TRUE	2011-09-21	marine metagenome	GAZ:United States of America:Palmyra Atoll	A2060_031F5_G_RF5_01_18813.mzXML	0	PAL21SEP11.3 Lyngbya sp.	FALSE	0	ENVO:marine biome	ENVO:sea water	ENVO:organic material	Lyngbya sp.	G	TRUE	TRUE	Lyngbya sp.	cyanobacteria	A2060.031F5.G.RF5.01.18813	1117	32.8427	-117.258	UCSD	UCSDMI	TRUE	FALSE	completed	UCSD	cyanobacteria	408172	Cyanobacteria	PAL
10125.A2060.031F6.I.RF6.01.18814.mzXML	0	A2060_031F6_I_RF6_01_18814.mzXML	TRUE	2011-09-21	marine metagenome	GAZ:United States of America:Palmyra Atoll	A2060_031F6_I_RF6_01_18814.mzXML	0	PAL21SEP11.3 Lyngbya sp.	FALSE	0	ENVO:marine biome	ENVO:sea water	ENVO:organic material	Lyngbya sp.	I	TRUE	TRUE	Lyngbya sp.	cyanobacteria	A2060.031F6.I.RF6.01.18814	1117	32.8427	-117.258	UCSD	UCSDMI	TRUE	FALSE	completed	UCSD	cyanobacteria	408172	Cyanobacteria	PAL
10125.A2061.031F10.C.RF10.01.18819.mzXML	0	A2061_031F10_C_RF10_01_18819.mzXML	TRUE	2011-09-22	marine metagenome	GAZ:United States of America:Palmyra Atoll	A2061_031F10_C_RF10_01_18819.mzXML	0	PAL22SEP11.3 thin green mat	FALSE	0	ENVO:marine biome	ENVO:sea water	ENVO:organic material	thin green mat	crude	TRUE	TRUE	thin green mat	cyanobacteria	A2061.031F10.C.RF10.01.18819	1117	32.8427	-117.258	UCSD	UCSDMI	TRUE	FALSE	completed	UCSD	cyanobacteria	408172	Cyanobacteria	PAL
10125.A2061.031F11.D.RF11.01.18820.mzXML	0	A2061_031F11_D_RF11_01_18820.mzXML	TRUE	2011-09-22	marine metagenome	GAZ:United States of America:Palmyra Atoll	A2061_031F11_D_RF11_01_18820.mzXML	0	PAL22SEP11.3 thin green mat	FALSE	0	ENVO:marine biome	ENVO:sea water	ENVO:organic material	thin green mat	A	TRUE	TRUE	thin green mat	cyanobacteria	A2061.031F11.D.RF11.01.18820	1117	32.8427	-117.258	UCSD	UCSDMI	TRUE	FALSE	completed	UCSD	cyanobacteria	408172	Cyanobacteria	PAL
10125.A2061.031F7.CRUDE.RF7.01.18816.mzXML	0	A2061_031F7_CRUDE_RF7_01_18816.mzXML	TRUE	2011-09-22	marine metagenome	GAZ:United States of America:Palmyra Atoll	A2061_031F7_CRUDE_RF7_01_18816.mzXML	0	PAL22SEP11.3 thin green mat	FALSE	0	ENVO:marine biome	ENVO:sea water	ENVO:organic material	thin green mat	B	TRUE	TRUE	thin green mat	cyanobacteria	A2061.031F7.CRUDE.RF7.01.18816	1117	32.8427	-117.258	UCSD	UCSDMI	TRUE	FALSE	completed	UCSD	cyanobacteria	408172	Cyanobacteria	PAL
10125.A2061.031F8.A.RF8.01.18817.mzXML	0	A2061_031F8_A_RF8_01_18817.mzXML	TRUE	2011-09-22	marine metagenome	GAZ:United States of America:Palmyra Atoll	A2061_031F8_A_RF8_01_18817.mzXML	0	PAL22SEP11.3 thin green mat	FALSE	0	ENVO:marine biome	ENVO:sea water	ENVO:organic material	thin green mat	C	TRUE	TRUE	thin green mat	cyanobacteria	A2061.031F8.A.RF8.01.18817	1117	32.8427	-117.258	UCSD	UCSDMI	TRUE	FALSE	completed	UCSD	cyanobacteria	408172	Cyanobacteria	PAL
10125.A2061.031F9.B.RF9.01.18818.mzXML	0	A2061_031F9_B_RF9_01_18818.mzXML	TRUE	2011-09-22	marine metagenome	GAZ:United States of America:Palmyra Atoll	A2061_031F9_B_RF9_01_18818.mzXML	0	PAL22SEP11.3 thin green mat	FALSE	0	ENVO:marine biome	ENVO:sea water	ENVO:organic material	thin green mat	D	TRUE	TRUE	thin green mat	cyanobacteria	A2061.031F9.B.RF9.01.18818	1117	32.8427	-117.258	UCSD	UCSDMI	TRUE	FALSE	completed	UCSD	cyanobacteria	408172	Cyanobacteria	PAL
10125.A2061.031G1.E.RG1.01.18821.mzXML	0	A2061_031G1_E_RG1_01_18821.mzXML	TRUE	2011-09-22	marine metagenome	GAZ:United States of America:Palmyra Atoll	A2061_031G1_E_RG1_01_18821.mzXML	0	PAL22SEP11.3 thin green mat	FALSE	0	ENVO:marine biome	ENVO:sea water	ENVO:organic material	thin green mat	E	TRUE	TRUE	thin green mat	cyanobacteria	A2061.031G1.E.RG1.01.18821	1117	32.8427	-117.258	UCSD	UCSDMI	TRUE	FALSE	completed	UCSD	cyanobacteria	408172	Cyanobacteria	PAL
10125.A2061.031G2.F.RG2.01.18822.mzXML	0	A2061_031G2_F_RG2_01_18822.mzXML	TRUE	2011-09-22	marine metagenome	GAZ:United States of America:Palmyra Atoll	A2061_031G2_F_RG2_01_18822.mzXML	0	PAL22SEP11.3 thin green mat	FALSE	0	ENVO:marine biome	ENVO:sea water	ENVO:organic material	thin green mat	F	TRUE	TRUE	thin green mat	cyanobacteria	A2061.031G2.F.RG2.01.18822	1117	32.8427	-117.258	UCSD	UCSDMI	TRUE	FALSE	completed	UCSD	cyanobacteria	408172	Cyanobacteria	PAL
10125.A1581.003H10.RH10.01.12793.mzXML	0	A1581_003H10_RH10_01_12793.mzXML	TRUE	2005-11-30	marine metagenome	GAZ:Panama	A1581_003H10_RH10_01_12793.mzXML	0	PAP31NOV05.4 red lyngbya	FALSE	0	ENVO:marine biome	ENVO:sea water	ENVO:organic material	red lyngbya	B	TRUE	TRUE	red lyngbya	cyanobacteria	A1581.003H10.RH10.01.12793	408172	9.28218	-82.177	UCSD	UCSDMI	TRUE	FALSE	completed	UCSD	cyanobacteria	408172	Cyanobacteria	PAP
10125.A1581.003H11.RH11.01.12794.mzXML	0	A1581_003H11_RH11_01_12794.mzXML	TRUE	2005-11-30	marine metagenome	GAZ:Panama	A1581_003H11_RH11_01_12794.mzXML	0	PAP31NOV05.4 red lyngbya	FALSE	0	ENVO:marine biome	ENVO:sea water	ENVO:organic material	red lyngbya	C	TRUE	TRUE	red lyngbya	cyanobacteria	A1581.003H11.RH11.01.12794	408172	9.28218	-82.177	UCSD	UCSDMI	TRUE	FALSE	completed	UCSD	cyanobacteria	408172	Cyanobacteria	PAP
10125.A1581.003H9.RH9.01.12792.mzXML	0	A1581_003H9_RH9_01_12792.mzXML	TRUE	2005-11-30	marine metagenome	GAZ:Panama	A1581_003H9_RH9_01_12792.mzXML	0	PAP31NOV05.4 red lyngbya	FALSE	0	ENVO:marine biome	ENVO:sea water	ENVO:organic material	red lyngbya	A	TRUE	TRUE	red lyngbya	cyanobacteria	A1581.003H9.RH9.01.12792	408172	9.28218	-82.177	UCSD	UCSDMI	TRUE	FALSE	completed	UCSD	cyanobacteria	408172	Cyanobacteria	PAP
10125.A1581.004A1.GA1.01.12795.mzXML	0	A1581_004A1_GA1_01_12795.mzXML	TRUE	2005-11-30	marine metagenome	GAZ:Panama	A1581_004A1_GA1_01_12795.mzXML	0	PAP31NOV05.4 red lyngbya	FALSE	0	ENVO:marine biome	ENVO:sea water	ENVO:organic material	red lyngbya	D	TRUE	TRUE	red lyngbya	cyanobacteria	A1581.004A1.GA1.01.12795	408172	9.28218	-82.177	UCSD	UCSDMI	TRUE	FALSE	completed	UCSD	cyanobacteria	408172	Cyanobacteria	PAP
10125.A1581.004A2.GA2.01.12796.mzXML	0	A1581_004A2_GA2_01_12796.mzXML	TRUE	2005-11-30	marine metagenome	GAZ:Panama	A1581_004A2_GA2_01_12796.mzXML	0	PAP31NOV05.4 red lyngbya	FALSE	0	ENVO:marine biome	ENVO:sea water	ENVO:organic material	red lyngbya	E	TRUE	TRUE	red lyngbya	cyanobacteria	A1581.004A2.GA2.01.12796	408172	9.28218	-82.177	UCSD	UCSDMI	TRUE	FALSE	completed	UCSD	cyanobacteria	408172	Cyanobacteria	PAP
10125.A1581.004A3.GA3.01.12797.mzXML	0	A1581_004A3_GA3_01_12797.mzXML	TRUE	2005-11-30	marine metagenome	GAZ:Panama	A1581_004A3_GA3_01_12797.mzXML	0	PAP31NOV05.4 red lyngbya	FALSE	0	ENVO:marine biome	ENVO:sea water	ENVO:organic material	red lyngbya	F	TRUE	TRUE	red lyngbya	cyanobacteria	A1581.004A3.GA3.01.12797	408172	9.28218	-82.177	UCSD	UCSDMI	TRUE	FALSE	completed	UCSD	cyanobacteria	408172	Cyanobacteria	PAP
10125.A1581.004A4.GA4.01.12798.mzXML	0	A1581_004A4_GA4_01_12798.mzXML	TRUE	2005-11-30	marine metagenome	GAZ:Panama	A1581_004A4_GA4_01_12798.mzXML	0	PAP31NOV05.4 red lyngbya	FALSE	0	ENVO:marine biome	ENVO:sea water	ENVO:organic material	red lyngbya	G	TRUE	TRUE	red lyngbya	cyanobacteria	A1581.004A4.GA4.01.12798	408172	9.28218	-82.177	UCSD	UCSDMI	TRUE	FALSE	completed	UCSD	cyanobacteria	408172	Cyanobacteria	PAP
10125.A1581.004A5.GA5.01.12799.mzXML	0	A1581_004A5_GA5_01_12799.mzXML	TRUE	2005-11-30	marine metagenome	GAZ:Panama	A1581_004A5_GA5_01_12799.mzXML	0	PAP31NOV05.4 red lyngbya	FALSE	0	ENVO:marine biome	ENVO:sea water	ENVO:organic material	red lyngbya	I	TRUE	TRUE	red lyngbya	cyanobacteria	A1581.004A5.GA5.01.12799	408172	9.28218	-82.177	UCSD	UCSDMI	TRUE	FALSE	completed	UCSD	cyanobacteria	408172	Cyanobacteria	PAP
10125.A1688.010E10.GE10.01.13473.mzXML	0	A1688_010E10_GE10_01_13473.mzXML	TRUE	2007-06-28	marine metagenome	GAZ:Panama	A1688_010E10_GE10_01_13473.mzXML	0	PAP28JUN07.1 red lyngbya	FALSE	0	ENVO:marine biome	ENVO:sea water	ENVO:organic material	red lyngbya	C	TRUE	TRUE	red lyngbya	cyanobacteria	A1688.010E10.GE10.01.13473	1117	9.77402	-79.5474	UCSD	UCSDMI	TRUE	FALSE	completed	UCSD	cyanobacteria	408172	Cyanobacteria	PAP
10125.A1688.010E11.GE11.01.13474.mzXML	0	A1688_010E11_GE11_01_13474.mzXML	TRUE	2007-06-28	marine metagenome	GAZ:Panama	A1688_010E11_GE11_01_13474.mzXML	0	PAP28JUN07.1 red lyngbya	FALSE	0	ENVO:marine biome	ENVO:sea water	ENVO:organic material	red lyngbya	D	TRUE	TRUE	red lyngbya	cyanobacteria	A1688.010E11.GE11.01.13474	1117	9.77402	-79.5474	UCSD	UCSDMI	TRUE	FALSE	completed	UCSD	cyanobacteria	408172	Cyanobacteria	PAP
10125.A1688.010E7.GE7.01.13470.mzXML	0	A1688_010E7_GE7_01_13470.mzXML	TRUE	2007-06-28	marine metagenome	GAZ:Panama	A1688_010E7_GE7_01_13470.mzXML	0	PAP28JUN07.1 red lyngbya	FALSE	0	ENVO:marine biome	ENVO:sea water	ENVO:organic material	red lyngbya	Crude	TRUE	TRUE	red lyngbya	cyanobacteria	A1688.010E7.GE7.01.13470	1117	9.77402	-79.5474	UCSD	UCSDMI	TRUE	FALSE	completed	UCSD	cyanobacteria	408172	Cyanobacteria	PAP
10125.A1688.010E8.GE8.01.13471.mzXML	0	A1688_010E8_GE8_01_13471.mzXML	TRUE	2007-06-28	marine metagenome	GAZ:Panama	A1688_010E8_GE8_01_13471.mzXML	0	PAP28JUN07.1 red lyngbya	FALSE	0	ENVO:marine biome	ENVO:sea water	ENVO:organic material	red lyngbya	A	TRUE	TRUE	red lyngbya	cyanobacteria	A1688.010E8.GE8.01.13471	1117	9.77402	-79.5474	UCSD	UCSDMI	TRUE	FALSE	completed	UCSD	cyanobacteria	408172	Cyanobacteria	PAP
10125.A1688.010E9.GE9.01.13472.mzXML	0	A1688_010E9_GE9_01_13472.mzXML	TRUE	2007-06-28	marine metagenome	GAZ:Panama	A1688_010E9_GE9_01_13472.mzXML	0	PAP28JUN07.1 red lyngbya	FALSE	0	ENVO:marine biome	ENVO:sea water	ENVO:organic material	red lyngbya	B	TRUE	TRUE	red lyngbya	cyanobacteria	A1688.010E9.GE9.01.13472	1117	9.77402	-79.5474	UCSD	UCSDMI	TRUE	FALSE	completed	UCSD	cyanobacteria	408172	Cyanobacteria	PAP
10125.A1689.010F1.GF1.01.13476.mzXML	0	A1689_010F1_GF1_01_13476.mzXML	TRUE	2007-06-29	marine metagenome	GAZ:Panama	A1689_010F1_GF1_01_13476.mzXML	0	PAP29JUN07.2 lyngbya	FALSE	0	ENVO:marine biome	ENVO:sea water	ENVO:organic material	lyngbya	Crude	TRUE	TRUE	lyngbya	cyanobacteria	A1689.010F1.GF1.01.13476	1117	9.61351	-79.6157	UCSD	UCSDMI	TRUE	FALSE	completed	UCSD	cyanobacteria	408172	Cyanobacteria	PAP
10125.A1689.010F2.GF2.01.13477.mzXML	0	A1689_010F2_GF2_01_13477.mzXML	TRUE	2007-06-29	marine metagenome	GAZ:Panama	A1689_010F2_GF2_01_13477.mzXML	0	PAP29JUN07.2 lyngbya	FALSE	0	ENVO:marine biome	ENVO:sea water	ENVO:organic material	lyngbya	A	TRUE	TRUE	lyngbya	cyanobacteria	A1689.010F2.GF2.01.13477	1117	9.61351	-79.6157	UCSD	UCSDMI	TRUE	FALSE	completed	UCSD	cyanobacteria	408172	Cyanobacteria	PAP
10125.A1689.010F3.GF3.01.13479.mzXML	0	A1689_010F3_GF3_01_13479.mzXML	TRUE	2007-06-29	marine metagenome	GAZ:Panama	A1689_010F3_GF3_01_13479.mzXML	0	PAP29JUN07.2 lyngbya	FALSE	0	ENVO:marine biome	ENVO:sea water	ENVO:organic material	lyngbya	C	TRUE	TRUE	lyngbya	cyanobacteria	A1689.010F3.GF3.01.13479	1117	9.61351	-79.6157	UCSD	UCSDMI	TRUE	FALSE	completed	UCSD	cyanobacteria	408172	Cyanobacteria	PAP
10125.A1692.010H10.GH10.01.13511.mzXML	0	A1692_010H10_GH10_01_13511.mzXML	TRUE	2007-02-25	marine metagenome	GAZ:Panama	A1692_010H10_GH10_01_13511.mzXML	0	PAP25FEB07.1 Lyngbya sp.	FALSE	0	ENVO:marine biome	ENVO:sea water	ENVO:organic material	Lyngbya sp.	G	TRUE	TRUE	Lyngbya sp.	cyanobacteria	A1692.010H10.GH10.01.13511	1117	9.59767	-79.6684	UCSD	UCSDMI	TRUE	FALSE	completed	UCSD	cyanobacteria	408172	Cyanobacteria	PAP
10125.A1692.010H11.GH11.01.13512.mzXML	0	A1692_010H11_GH11_01_13512.mzXML	TRUE	2007-02-25	marine metagenome	GAZ:Panama	A1692_010H11_GH11_01_13512.mzXML	0	PAP25FEB07.1 Lyngbya sp.	FALSE	0	ENVO:marine biome	ENVO:sea water	ENVO:organic material	Lyngbya sp.	H	TRUE	TRUE	Lyngbya sp.	cyanobacteria	A1692.010H11.GH11.01.13512	1117	9.59767	-79.6684	UCSD	UCSDMI	TRUE	FALSE	completed	UCSD	cyanobacteria	408172	Cyanobacteria	PAP
10125.A1692.010H3.GH3.01.13504.mzXML	0	A1692_010H3_GH3_01_13504.mzXML	TRUE	2007-02-25	marine metagenome	GAZ:Panama	A1692_010H3_GH3_01_13504.mzXML	0	PAP25FEB07.1 Lyngbya sp.	FALSE	0	ENVO:marine biome	ENVO:sea water	ENVO:organic material	Lyngbya sp.	Crude	TRUE	TRUE	Lyngbya sp.	cyanobacteria	A1692.010H3.GH3.01.13504	1117	9.59767	-79.6684	UCSD	UCSDMI	TRUE	FALSE	completed	UCSD	cyanobacteria	408172	Cyanobacteria	PAP
10125.A1692.010H4.GH4.01.13505.mzXML	0	A1692_010H4_GH4_01_13505.mzXML	TRUE	2007-02-25	marine metagenome	GAZ:Panama	A1692_010H4_GH4_01_13505.mzXML	0	PAP25FEB07.1 Lyngbya sp.	FALSE	0	ENVO:marine biome	ENVO:sea water	ENVO:organic material	Lyngbya sp.	A	TRUE	TRUE	Lyngbya sp.	cyanobacteria	A1692.010H4.GH4.01.13505	1117	9.59767	-79.6684	UCSD	UCSDMI	TRUE	FALSE	completed	UCSD	cyanobacteria	408172	Cyanobacteria	PAP
10125.A1692.010H5.GH5.01.13506.mzXML	0	A1692_010H5_GH5_01_13506.mzXML	TRUE	2007-02-25	marine metagenome	GAZ:Panama	A1692_010H5_GH5_01_13506.mzXML	0	PAP25FEB07.1 Lyngbya sp.	FALSE	0	ENVO:marine biome	ENVO:sea water	ENVO:organic material	Lyngbya sp.	B	TRUE	TRUE	Lyngbya sp.	cyanobacteria	A1692.010H5.GH5.01.13506	1117	9.59767	-79.6684	UCSD	UCSDMI	TRUE	FALSE	completed	UCSD	cyanobacteria	408172	Cyanobacteria	PAP
10125.A1692.010H6.GH6.01.13507.mzXML	0	A1692_010H6_GH6_01_13507.mzXML	TRUE	2007-02-25	marine metagenome	GAZ:Panama	A1692_010H6_GH6_01_13507.mzXML	0	PAP25FEB07.1 Lyngbya sp.	FALSE	0	ENVO:marine biome	ENVO:sea water	ENVO:organic material	Lyngbya sp.	C	TRUE	TRUE	Lyngbya sp.	cyanobacteria	A1692.010H6.GH6.01.13507	1117	9.59767	-79.6684	UCSD	UCSDMI	TRUE	FALSE	completed	UCSD	cyanobacteria	408172	Cyanobacteria	PAP
10125.A1692.010H7.GH7.01.13508.mzXML	0	A1692_010H7_GH7_01_13508.mzXML	TRUE	2007-02-25	marine metagenome	GAZ:Panama	A1692_010H7_GH7_01_13508.mzXML	0	PAP25FEB07.1 Lyngbya sp.	FALSE	0	ENVO:marine biome	ENVO:sea water	ENVO:organic material	Lyngbya sp.	D	TRUE	TRUE	Lyngbya sp.	cyanobacteria	A1692.010H7.GH7.01.13508	1117	9.59767	-79.6684	UCSD	UCSDMI	TRUE	FALSE	completed	UCSD	cyanobacteria	408172	Cyanobacteria	PAP
10125.A1692.010H8.GH8.01.13509.mzXML	0	A1692_010H8_GH8_01_13509.mzXML	TRUE	2007-02-25	marine metagenome	GAZ:Panama	A1692_010H8_GH8_01_13509.mzXML	0	PAP25FEB07.1 Lyngbya sp.	FALSE	0	ENVO:marine biome	ENVO:sea water	ENVO:organic material	Lyngbya sp.	E	TRUE	TRUE	Lyngbya sp.	cyanobacteria	A1692.010H8.GH8.01.13509	1117	9.59767	-79.6684	UCSD	UCSDMI	TRUE	FALSE	completed	UCSD	cyanobacteria	408172	Cyanobacteria	PAP
10125.A1692.010H9.GH9.01.13510.mzXML	0	A1692_010H9_GH9_01_13510.mzXML	TRUE	2007-02-25	marine metagenome	GAZ:Panama	A1692_010H9_GH9_01_13510.mzXML	0	PAP25FEB07.1 Lyngbya sp.	FALSE	0	ENVO:marine biome	ENVO:sea water	ENVO:organic material	Lyngbya sp.	F	TRUE	TRUE	Lyngbya sp.	cyanobacteria	A1692.010H9.GH9.01.13510	1117	9.59767	-79.6684	UCSD	UCSDMI	TRUE	FALSE	completed	UCSD	cyanobacteria	408172	Cyanobacteria	PAP
10125.A1692.011A1.RA1.01.13513.mzXML	0	A1692_011A1_RA1_01_13513.mzXML	TRUE	2007-02-25	marine metagenome	GAZ:Panama	A1692_011A1_RA1_01_13513.mzXML	0	PAP25FEB07.1 Lyngbya sp.	FALSE	0	ENVO:marine biome	ENVO:sea water	ENVO:organic material	Lyngbya sp.	I	TRUE	TRUE	Lyngbya sp.	cyanobacteria	A1692.011A1.RA1.01.13513	1117	9.59767	-79.6684	UCSD	UCSDMI	TRUE	FALSE	completed	UCSD	cyanobacteria	408172	Cyanobacteria	PAP
10125.A1693.011A2.RA2.01.13515.mzXML	0	A1693_011A2_RA2_01_13515.mzXML	TRUE	2007-06-29	marine metagenome	GAZ:Panama	A1693_011A2_RA2_01_13515.mzXML	0	PAP29JUN07.4 unknown	FALSE	0	ENVO:marine biome	ENVO:sea water	ENVO:organic material	other	Crude	TRUE	TRUE	other	other	A1693.011A2.RA2.01.13515	408172	9.61351	-79.6157	UCSD	UCSDMI	TRUE	FALSE	completed	UCSD	cyanobacteria	408172	Cyanobacteria	PAP
10125.A1693.011A3.RA3.01.13516.mzXML	0	A1693_011A3_RA3_01_13516.mzXML	TRUE	2007-06-29	marine metagenome	GAZ:Panama	A1693_011A3_RA3_01_13516.mzXML	0	PAP29JUN07.4 unknown	FALSE	0	ENVO:marine biome	ENVO:sea water	ENVO:organic material	other	A	TRUE	TRUE	other	other	A1693.011A3.RA3.01.13516	408172	9.61351	-79.6157	UCSD	UCSDMI	TRUE	FALSE	completed	UCSD	cyanobacteria	408172	Cyanobacteria	PAP
10125.A1693.011A4.RA4.01.13517.mzXML	0	A1693_011A4_RA4_01_13517.mzXML	TRUE	2007-06-29	marine metagenome	GAZ:Panama	A1693_011A4_RA4_01_13517.mzXML	0	PAP29JUN07.4 unknown	FALSE	0	ENVO:marine biome	ENVO:sea water	ENVO:organic material	other	B	TRUE	TRUE	other	other	A1693.011A4.RA4.01.13517	408172	9.61351	-79.6157	UCSD	UCSDMI	TRUE	FALSE	completed	UCSD	cyanobacteria	408172	Cyanobacteria	PAP
10125.A1693.011A5.RA5.01.13518.mzXML	0	A1693_011A5_RA5_01_13518.mzXML	TRUE	2007-06-29	marine metagenome	GAZ:Panama	A1693_011A5_RA5_01_13518.mzXML	0	PAP29JUN07.4 unknown	FALSE	0	ENVO:marine biome	ENVO:sea water	ENVO:organic material	other	C	TRUE	TRUE	other	other	A1693.011A5.RA5.01.13518	408172	9.61351	-79.6157	UCSD	UCSDMI	TRUE	FALSE	completed	UCSD	cyanobacteria	408172	Cyanobacteria	PAP
10125.A1693.011A6.RA6.01.13519.mzXML	0	A1693_011A6_RA6_01_13519.mzXML	TRUE	2007-06-29	marine metagenome	GAZ:Panama	A1693_011A6_RA6_01_13519.mzXML	0	PAP29JUN07.4 unknown	FALSE	0	ENVO:marine biome	ENVO:sea water	ENVO:organic material	other	D	TRUE	TRUE	other	other	A1693.011A6.RA6.01.13519	408172	9.61351	-79.6157	UCSD	UCSDMI	TRUE	FALSE	completed	UCSD	cyanobacteria	408172	Cyanobacteria	PAP
10125.A1693.011A7.RA7.01.13520.mzXML	0	A1693_011A7_RA7_01_13520.mzXML	TRUE	2007-06-29	marine metagenome	GAZ:Panama	A1693_011A7_RA7_01_13520.mzXML	0	PAP29JUN07.4 unknown	FALSE	0	ENVO:marine biome	ENVO:sea water	ENVO:organic material	other	F	TRUE	TRUE	other	other	A1693.011A7.RA7.01.13520	408172	9.61351	-79.6157	UCSD	UCSDMI	TRUE	FALSE	completed	UCSD	cyanobacteria	408172	Cyanobacteria	PAP
10125.A1699.011C10.RC10.01.13549.mzXML	0	A1699_011C10_RC10_01_13549.mzXML	TRUE	2007-02-25	marine metagenome	GAZ:Panama	A1699_011C10_RC10_01_13549.mzXML	0	PAP25FEB07.3 symploca	FALSE	0	ENVO:marine biome	ENVO:sea water	ENVO:organic material	symploca	H	TRUE	TRUE	symploca	cyanobacteria	A1699.011C10.RC10.01.13549	1117	9.59767	-79.6684	UCSD	UCSDMI	TRUE	FALSE	completed	UCSD	cyanobacteria	408172	Cyanobacteria	PAP
10125.A1699.011C11.RC11.01.13550.mzXML	0	A1699_011C11_RC11_01_13550.mzXML	TRUE	2007-02-25	marine metagenome	GAZ:Panama	A1699_011C11_RC11_01_13550.mzXML	0	PAP25FEB07.3 symploca	FALSE	0	ENVO:marine biome	ENVO:sea water	ENVO:organic material	symploca	I	TRUE	TRUE	symploca	cyanobacteria	A1699.011C11.RC11.01.13550	1117	9.59767	-79.6684	UCSD	UCSDMI	TRUE	FALSE	completed	UCSD	cyanobacteria	408172	Cyanobacteria	PAP
10125.A1699.011C2.RC2.01.13540.mzXML	0	A1699_011C2_RC2_01_13540.mzXML	TRUE	2007-02-25	marine metagenome	GAZ:Panama	A1699_011C2_RC2_01_13540.mzXML	0	PAP25FEB07.3 symploca	FALSE	0	ENVO:marine biome	ENVO:sea water	ENVO:organic material	symploca	Crude	TRUE	TRUE	symploca	cyanobacteria	A1699.011C2.RC2.01.13540	1117	9.59767	-79.6684	UCSD	UCSDMI	TRUE	FALSE	completed	UCSD	cyanobacteria	408172	Cyanobacteria	PAP
10125.A1699.011C3.RC3.01.13541.mzXML	0	A1699_011C3_RC3_01_13541.mzXML	TRUE	2007-02-25	marine metagenome	GAZ:Panama	A1699_011C3_RC3_01_13541.mzXML	0	PAP25FEB07.3 symploca	FALSE	0	ENVO:marine biome	ENVO:sea water	ENVO:organic material	symploca	A	TRUE	TRUE	symploca	cyanobacteria	A1699.011C3.RC3.01.13541	1117	9.59767	-79.6684	UCSD	UCSDMI	TRUE	FALSE	completed	UCSD	cyanobacteria	408172	Cyanobacteria	PAP
10125.A1699.011C4.RC4.01.13542.mzXML	0	A1699_011C4_RC4_01_13542.mzXML	TRUE	2007-02-25	marine metagenome	GAZ:Panama	A1699_011C4_RC4_01_13542.mzXML	0	PAP25FEB07.3 symploca	FALSE	0	ENVO:marine biome	ENVO:sea water	ENVO:organic material	symploca	B	TRUE	TRUE	symploca	cyanobacteria	A1699.011C4.RC4.01.13542	1117	9.59767	-79.6684	UCSD	UCSDMI	TRUE	FALSE	completed	UCSD	cyanobacteria	408172	Cyanobacteria	PAP
10125.A1699.011C5.RC5.01.13543.mzXML	0	A1699_011C5_RC5_01_13543.mzXML	TRUE	2007-02-25	marine metagenome	GAZ:Panama	A1699_011C5_RC5_01_13543.mzXML	0	PAP25FEB07.3 symploca	FALSE	0	ENVO:marine biome	ENVO:sea water	ENVO:organic material	symploca	C	TRUE	TRUE	symploca	cyanobacteria	A1699.011C5.RC5.01.13543	1117	9.59767	-79.6684	UCSD	UCSDMI	TRUE	FALSE	completed	UCSD	cyanobacteria	408172	Cyanobacteria	PAP
10125.A1699.011C6.RC6.01.13544.mzXML	0	A1699_011C6_RC6_01_13544.mzXML	TRUE	2007-02-25	marine metagenome	GAZ:Panama	A1699_011C6_RC6_01_13544.mzXML	0	PAP25FEB07.3 symploca	FALSE	0	ENVO:marine biome	ENVO:sea water	ENVO:organic material	symploca	D	TRUE	TRUE	symploca	cyanobacteria	A1699.011C6.RC6.01.13544	1117	9.59767	-79.6684	UCSD	UCSDMI	TRUE	FALSE	completed	UCSD	cyanobacteria	408172	Cyanobacteria	PAP
10125.A1699.011C7.RC7.01.13545.mzXML	0	A1699_011C7_RC7_01_13545.mzXML	TRUE	2007-02-25	marine metagenome	GAZ:Panama	A1699_011C7_RC7_01_13545.mzXML	0	PAP25FEB07.3 symploca	FALSE	0	ENVO:marine biome	ENVO:sea water	ENVO:organic material	symploca	E	TRUE	TRUE	symploca	cyanobacteria	A1699.011C7.RC7.01.13545	1117	9.59767	-79.6684	UCSD	UCSDMI	TRUE	FALSE	completed	UCSD	cyanobacteria	408172	Cyanobacteria	PAP
10125.A1699.011C8.RC8.01.13546.mzXML	0	A1699_011C8_RC8_01_13546.mzXML	TRUE	2007-02-25	marine metagenome	GAZ:Panama	A1699_011C8_RC8_01_13546.mzXML	0	PAP25FEB07.3 symploca	FALSE	0	ENVO:marine biome	ENVO:sea water	ENVO:organic material	symploca	F	TRUE	TRUE	symploca	cyanobacteria	A1699.011C8.RC8.01.13546	1117	9.59767	-79.6684	UCSD	UCSDMI	TRUE	FALSE	completed	UCSD	cyanobacteria	408172	Cyanobacteria	PAP
10125.A1699.011C9.RC9.01.13548.mzXML	0	A1699_011C9_RC9_01_13548.mzXML	TRUE	2007-02-25	marine metagenome	GAZ:Panama	A1699_011C9_RC9_01_13548.mzXML	0	PAP25FEB07.3 symploca	FALSE	0	ENVO:marine biome	ENVO:sea water	ENVO:organic material	symploca	G	TRUE	TRUE	symploca	cyanobacteria	A1699.011C9.RC9.01.13548	1117	9.59767	-79.6684	UCSD	UCSDMI	TRUE	FALSE	completed	UCSD	cyanobacteria	408172	Cyanobacteria	PAP
10125.A1723.012E11.GE11.01.13687.mzXML	0	A1723_012E11_GE11_01_13687.mzXML	TRUE	2007-06-29	marine metagenome	GAZ:Panama	A1723_012E11_GE11_01_13687.mzXML	0	PAP29JUN07.3 crust forming	FALSE	0	ENVO:marine biome	ENVO:sea water	ENVO:organic material	crust forming	A	TRUE	TRUE	crust forming	cyanobacteria	A1723.012E11.GE11.01.13687	408172	9.61351	-79.6157	UCSD	UCSDMI	TRUE	FALSE	completed	UCSD	cyanobacteria	408172	Cyanobacteria	PAP
10125.A1723.012F1.GF1.01.13688.mzXML	0	A1723_012F1_GF1_01_13688.mzXML	TRUE	2007-06-29	marine metagenome	GAZ:Panama	A1723_012F1_GF1_01_13688.mzXML	0	PAP29JUN07.3 crust forming	FALSE	0	ENVO:marine biome	ENVO:sea water	ENVO:organic material	crust forming	B	TRUE	TRUE	crust forming	cyanobacteria	A1723.012F1.GF1.01.13688	408172	9.61351	-79.6157	UCSD	UCSDMI	TRUE	FALSE	completed	UCSD	cyanobacteria	408172	Cyanobacteria	PAP
10125.A1723.012F2.2.GF2.01.13690.mzXML	0	A1723_012F2_2_GF2_01_13690.mzXML	TRUE	2007-06-29	marine metagenome	GAZ:Panama	A1723_012F2_2_GF2_01_13690.mzXML	0	PAP29JUN07.3 crust forming	FALSE	0	ENVO:marine biome	ENVO:sea water	ENVO:organic material	crust forming	C	TRUE	TRUE	crust forming	cyanobacteria	A1723.012F2.2.GF2.01.13690	408172	9.61351	-79.6157	UCSD	UCSDMI	TRUE	FALSE	completed	UCSD	cyanobacteria	408172	Cyanobacteria	PAP
10125.A1723.012F3.GF3.01.13691.mzXML	0	A1723_012F3_GF3_01_13691.mzXML	TRUE	2007-06-29	marine metagenome	GAZ:Panama	A1723_012F3_GF3_01_13691.mzXML	0	PAP29JUN07.3 crust forming	FALSE	0	ENVO:marine biome	ENVO:sea water	ENVO:organic material	crust forming	H	TRUE	TRUE	crust forming	cyanobacteria	A1723.012F3.GF3.01.13691	408172	9.61351	-79.6157	UCSD	UCSDMI	TRUE	FALSE	completed	UCSD	cyanobacteria	408172	Cyanobacteria	PAP
10125.A1723.012F4.GF4.01.13692.mzXML	0	A1723_012F4_GF4_01_13692.mzXML	TRUE	2007-06-29	marine metagenome	GAZ:Panama	A1723_012F4_GF4_01_13692.mzXML	0	PAP29JUN07.3 crust forming	FALSE	0	ENVO:marine biome	ENVO:sea water	ENVO:organic material	crust forming	I	TRUE	TRUE	crust forming	cyanobacteria	A1723.012F4.GF4.01.13692	408172	9.61351	-79.6157	UCSD	UCSDMI	TRUE	FALSE	completed	UCSD	cyanobacteria	408172	Cyanobacteria	PAP
10125.A1729.013A10.RA10.01.13746.mzXML	0	A1729_013A10_RA10_01_13746.mzXML	TRUE	2005-04-02	marine metagenome	GAZ:Panama	A1729_013A10_RA10_01_13746.mzXML	0	PAP02APR05.1 red algae	FALSE	0	ENVO:marine biome	ENVO:sea water	ENVO:organic material	red algae	F	TRUE	TRUE	red algae	red algae	A1729.013A10.RA10.01.13746	2763	9.5994	-79.6978	UCSD	UCSDMI	TRUE	FALSE	completed	UCSD	cyanobacteria	408172	Cyanobacteria	PAP
10125.A1729.013A5.RA5.01.13741.mzXML	0	A1729_013A5_RA5_01_13741.mzXML	TRUE	2005-04-02	marine metagenome	GAZ:Panama	A1729_013A5_RA5_01_13741.mzXML	0	PAP02APR05.1 red algae	FALSE	0	ENVO:marine biome	ENVO:sea water	ENVO:organic material	red algae	A	TRUE	TRUE	red algae	red algae	A1729.013A5.RA5.01.13741	2763	9.5994	-79.6978	UCSD	UCSDMI	TRUE	FALSE	completed	UCSD	cyanobacteria	408172	Cyanobacteria	PAP
10125.A1729.013A6.RA6.01.13742.mzXML	0	A1729_013A6_RA6_01_13742.mzXML	TRUE	2005-04-02	marine metagenome	GAZ:Panama	A1729_013A6_RA6_01_13742.mzXML	0	PAP02APR05.1 red algae	FALSE	0	ENVO:marine biome	ENVO:sea water	ENVO:organic material	red algae	B	TRUE	TRUE	red algae	red algae	A1729.013A6.RA6.01.13742	2763	9.5994	-79.6978	UCSD	UCSDMI	TRUE	FALSE	completed	UCSD	cyanobacteria	408172	Cyanobacteria	PAP
10125.A1729.013A7.RA7.01.13743.mzXML	0	A1729_013A7_RA7_01_13743.mzXML	TRUE	2005-04-02	marine metagenome	GAZ:Panama	A1729_013A7_RA7_01_13743.mzXML	0	PAP02APR05.1 red algae	FALSE	0	ENVO:marine biome	ENVO:sea water	ENVO:organic material	red algae	C	TRUE	TRUE	red algae	red algae	A1729.013A7.RA7.01.13743	2763	9.5994	-79.6978	UCSD	UCSDMI	TRUE	FALSE	completed	UCSD	cyanobacteria	408172	Cyanobacteria	PAP
10125.A1729.013A8.RA8.01.13744.mzXML	0	A1729_013A8_RA8_01_13744.mzXML	TRUE	2005-04-02	marine metagenome	GAZ:Panama	A1729_013A8_RA8_01_13744.mzXML	0	PAP02APR05.1 red algae	FALSE	0	ENVO:marine biome	ENVO:sea water	ENVO:organic material	red algae	D	TRUE	TRUE	red algae	red algae	A1729.013A8.RA8.01.13744	2763	9.5994	-79.6978	UCSD	UCSDMI	TRUE	FALSE	completed	UCSD	cyanobacteria	408172	Cyanobacteria	PAP
10125.A1729.013A9.RA9.01.13745.mzXML	0	A1729_013A9_RA9_01_13745.mzXML	TRUE	2005-04-02	marine metagenome	GAZ:Panama	A1729_013A9_RA9_01_13745.mzXML	0	PAP02APR05.1 red algae	FALSE	0	ENVO:marine biome	ENVO:sea water	ENVO:organic material	red algae	E	TRUE	TRUE	red algae	red algae	A1729.013A9.RA9.01.13745	2763	9.5994	-79.6978	UCSD	UCSDMI	TRUE	FALSE	completed	UCSD	cyanobacteria	408172	Cyanobacteria	PAP
10125.A1730.013A11.RA11.01.13748.mzXML	0	A1730_013A11_RA11_01_13748.mzXML	TRUE	2005-04-02	marine metagenome	GAZ:Panama	A1730_013A11_RA11_01_13748.mzXML	0	PAP02APR05.1 red algae	FALSE	0	ENVO:marine biome	ENVO:sea water	ENVO:organic material	red algae	H	TRUE	TRUE	red algae	red algae	A1730.013A11.RA11.01.13748	2763	9.5994	-79.6978	UCSD	UCSDMI	TRUE	FALSE	completed	UCSD	cyanobacteria	408172	Cyanobacteria	PAP
10125.A1731.013B1.RB1.01.13750.mzXML	0	A1731_013B1_RB1_01_13750.mzXML	TRUE	2005-04-02	marine metagenome	GAZ:Panama	A1731_013B1_RB1_01_13750.mzXML	0	PAP02APR05.1 red algae	FALSE	0	ENVO:marine biome	ENVO:sea water	ENVO:organic material	red algae	I	TRUE	TRUE	red algae	red algae	A1731.013B1.RB1.01.13750	2763	9.5994	-79.6978	UCSD	UCSDMI	TRUE	FALSE	completed	UCSD	cyanobacteria	408172	Cyanobacteria	PAP
10125.A1764.015E10.RE10.01.13968.mzXML	0	A1764_015E10_RE10_01_13968.mzXML	TRUE	2005-04-02	marine metagenome	GAZ:Panama	A1764_015E10_RE10_01_13968.mzXML	0	PAP02APR05.4 liagora	FALSE	0	ENVO:marine biome	ENVO:sea water	ENVO:organic material	liagora	I	TRUE	TRUE	liagora	red algae	A1764.015E10.RE10.01.13968	2763	9.5994	-79.6978	UCSD	UCSDMI	TRUE	FALSE	completed	UCSD	cyanobacteria	408172	Cyanobacteria	PAP
10125.A1764.015E2.RE2.01.13960.mzXML	0	A1764_015E2_RE2_01_13960.mzXML	TRUE	2005-04-02	marine metagenome	GAZ:Panama	A1764_015E2_RE2_01_13960.mzXML	0	PAP02APR05.4 liagora	FALSE	0	ENVO:marine biome	ENVO:sea water	ENVO:organic material	liagora	A	TRUE	TRUE	liagora	red algae	A1764.015E2.RE2.01.13960	2763	9.5994	-79.6978	UCSD	UCSDMI	TRUE	FALSE	completed	UCSD	cyanobacteria	408172	Cyanobacteria	PAP
10125.A1764.015E3.RE3.01.13961.mzXML	0	A1764_015E3_RE3_01_13961.mzXML	TRUE	2005-04-02	marine metagenome	GAZ:Panama	A1764_015E3_RE3_01_13961.mzXML	0	PAP02APR05.4 liagora	FALSE	0	ENVO:marine biome	ENVO:sea water	ENVO:organic material	liagora	B	TRUE	TRUE	liagora	red algae	A1764.015E3.RE3.01.13961	2763	9.5994	-79.6978	UCSD	UCSDMI	TRUE	FALSE	completed	UCSD	cyanobacteria	408172	Cyanobacteria	PAP
10125.A1764.015E4.RE4.01.13962.mzXML	0	A1764_015E4_RE4_01_13962.mzXML	TRUE	2005-04-02	marine metagenome	GAZ:Panama	A1764_015E4_RE4_01_13962.mzXML	0	PAP02APR05.4 liagora	FALSE	0	ENVO:marine biome	ENVO:sea water	ENVO:organic material	liagora	C	TRUE	TRUE	liagora	red algae	A1764.015E4.RE4.01.13962	2763	9.5994	-79.6978	UCSD	UCSDMI	TRUE	FALSE	completed	UCSD	cyanobacteria	408172	Cyanobacteria	PAP
10125.A1764.015E5.RE5.01.13963.mzXML	0	A1764_015E5_RE5_01_13963.mzXML	TRUE	2005-04-02	marine metagenome	GAZ:Panama	A1764_015E5_RE5_01_13963.mzXML	0	PAP02APR05.4 liagora	FALSE	0	ENVO:marine biome	ENVO:sea water	ENVO:organic material	liagora	D	TRUE	TRUE	liagora	red algae	A1764.015E5.RE5.01.13963	2763	9.5994	-79.6978	UCSD	UCSDMI	TRUE	FALSE	completed	UCSD	cyanobacteria	408172	Cyanobacteria	PAP
10125.A1764.015E6.RE6.01.13964.mzXML	0	A1764_015E6_RE6_01_13964.mzXML	TRUE	2005-04-02	marine metagenome	GAZ:Panama	A1764_015E6_RE6_01_13964.mzXML	0	PAP02APR05.4 liagora	FALSE	0	ENVO:marine biome	ENVO:sea water	ENVO:organic material	liagora	E	TRUE	TRUE	liagora	red algae	A1764.015E6.RE6.01.13964	2763	9.5994	-79.6978	UCSD	UCSDMI	TRUE	FALSE	completed	UCSD	cyanobacteria	408172	Cyanobacteria	PAP
10125.A1764.015E7.RE7.01.13965.mzXML	0	A1764_015E7_RE7_01_13965.mzXML	TRUE	2005-04-02	marine metagenome	GAZ:Panama	A1764_015E7_RE7_01_13965.mzXML	0	PAP02APR05.4 liagora	FALSE	0	ENVO:marine biome	ENVO:sea water	ENVO:organic material	liagora	F	TRUE	TRUE	liagora	red algae	A1764.015E7.RE7.01.13965	2763	9.5994	-79.6978	UCSD	UCSDMI	TRUE	FALSE	completed	UCSD	cyanobacteria	408172	Cyanobacteria	PAP
10125.A1764.015E8.RE8.01.13966.mzXML	0	A1764_015E8_RE8_01_13966.mzXML	TRUE	2005-04-02	marine metagenome	GAZ:Panama	A1764_015E8_RE8_01_13966.mzXML	0	PAP02APR05.4 liagora	FALSE	0	ENVO:marine biome	ENVO:sea water	ENVO:organic material	liagora	G	TRUE	TRUE	liagora	red algae	A1764.015E8.RE8.01.13966	2763	9.5994	-79.6978	UCSD	UCSDMI	TRUE	FALSE	completed	UCSD	cyanobacteria	408172	Cyanobacteria	PAP
10125.A1764.015E9.RE9.01.13967.mzXML	0	A1764_015E9_RE9_01_13967.mzXML	TRUE	2005-04-02	marine metagenome	GAZ:Panama	A1764_015E9_RE9_01_13967.mzXML	0	PAP02APR05.4 liagora	FALSE	0	ENVO:marine biome	ENVO:sea water	ENVO:organic material	liagora	H	TRUE	TRUE	liagora	red algae	A1764.015E9.RE9.01.13967	2763	9.5994	-79.6978	UCSD	UCSDMI	TRUE	FALSE	completed	UCSD	cyanobacteria	408172	Cyanobacteria	PAP
10125.A1768.015H10.RH10.01.14005.mzXML	0	A1768_015H10_RH10_01_14005.mzXML	TRUE	2007-12-17	marine metagenome	GAZ:Panama	A1768_015H10_RH10_01_14005.mzXML	0	PAP17DEC07.2 Lyngbya or Leptolyngbya	FALSE	0	ENVO:marine biome	ENVO:sea water	ENVO:organic material	Lyngbya or Leptolyngbya	B	TRUE	TRUE	Lyngbya or Leptolyngbya	cyanobacteria	A1768.015H10.RH10.01.14005	1117	9.56097	-79.6846	UCSD	UCSDMI	TRUE	FALSE	completed	UCSD	cyanobacteria	408172	Cyanobacteria	PAP
10125.A1768.015H11.RH11.01.14006.mzXML	0	A1768_015H11_RH11_01_14006.mzXML	TRUE	2007-12-17	marine metagenome	GAZ:Panama	A1768_015H11_RH11_01_14006.mzXML	0	PAP17DEC07.2 Lyngbya or Leptolyngbya	FALSE	0	ENVO:marine biome	ENVO:sea water	ENVO:organic material	Lyngbya or Leptolyngbya	C	TRUE	TRUE	Lyngbya or Leptolyngbya	cyanobacteria	A1768.015H11.RH11.01.14006	1117	9.56097	-79.6846	UCSD	UCSDMI	TRUE	FALSE	completed	UCSD	cyanobacteria	408172	Cyanobacteria	PAP
10125.A1768.015H8.RH8.01.14003.mzXML	0	A1768_015H8_RH8_01_14003.mzXML	TRUE	2007-12-17	marine metagenome	GAZ:Panama	A1768_015H8_RH8_01_14003.mzXML	0	PAP17DEC07.2 Lyngbya or Leptolyngbya	FALSE	0	ENVO:marine biome	ENVO:sea water	ENVO:organic material	Lyngbya or Leptolyngbya	Crude	TRUE	TRUE	Lyngbya or Leptolyngbya	cyanobacteria	A1768.015H8.RH8.01.14003	1117	9.56097	-79.6846	UCSD	UCSDMI	TRUE	FALSE	completed	UCSD	cyanobacteria	408172	Cyanobacteria	PAP
10125.A1768.015H9.RH9.01.14004.mzXML	0	A1768_015H9_RH9_01_14004.mzXML	TRUE	2007-12-17	marine metagenome	GAZ:Panama	A1768_015H9_RH9_01_14004.mzXML	0	PAP17DEC07.2 Lyngbya or Leptolyngbya	FALSE	0	ENVO:marine biome	ENVO:sea water	ENVO:organic material	Lyngbya or Leptolyngbya	A	TRUE	TRUE	Lyngbya or Leptolyngbya	cyanobacteria	A1768.015H9.RH9.01.14004	1117	9.56097	-79.6846	UCSD	UCSDMI	TRUE	FALSE	completed	UCSD	cyanobacteria	408172	Cyanobacteria	PAP
10125.A1768.016A1.GA1.01.14007.mzXML	0	A1768_016A1_GA1_01_14007.mzXML	TRUE	2007-12-17	marine metagenome	GAZ:Panama	A1768_016A1_GA1_01_14007.mzXML	0	PAP17DEC07.2 Lyngbya or Leptolyngbya	FALSE	0	ENVO:marine biome	ENVO:sea water	ENVO:organic material	Lyngbya or Leptolyngbya	D	TRUE	TRUE	Lyngbya or Leptolyngbya	cyanobacteria	A1768.016A1.GA1.01.14007	1117	9.56097	-79.6846	UCSD	UCSDMI	TRUE	FALSE	completed	UCSD	cyanobacteria	408172	Cyanobacteria	PAP
10125.A1768.016A2.GA2.01.14008.mzXML	0	A1768_016A2_GA2_01_14008.mzXML	TRUE	2007-12-17	marine metagenome	GAZ:Panama	A1768_016A2_GA2_01_14008.mzXML	0	PAP17DEC07.2 Lyngbya or Leptolyngbya	FALSE	0	ENVO:marine biome	ENVO:sea water	ENVO:organic material	Lyngbya or Leptolyngbya	E	TRUE	TRUE	Lyngbya or Leptolyngbya	cyanobacteria	A1768.016A2.GA2.01.14008	1117	9.56097	-79.6846	UCSD	UCSDMI	TRUE	FALSE	completed	UCSD	cyanobacteria	408172	Cyanobacteria	PAP
10125.A1768.016A3.GA3.01.14009.mzXML	0	A1768_016A3_GA3_01_14009.mzXML	TRUE	2007-12-17	marine metagenome	GAZ:Panama	A1768_016A3_GA3_01_14009.mzXML	0	PAP17DEC07.2 Lyngbya or Leptolyngbya	FALSE	0	ENVO:marine biome	ENVO:sea water	ENVO:organic material	Lyngbya or Leptolyngbya	F	TRUE	TRUE	Lyngbya or Leptolyngbya	cyanobacteria	A1768.016A3.GA3.01.14009	1117	9.56097	-79.6846	UCSD	UCSDMI	TRUE	FALSE	completed	UCSD	cyanobacteria	408172	Cyanobacteria	PAP
10125.A1768.016A4.GA4.01.14010.mzXML	0	A1768_016A4_GA4_01_14010.mzXML	TRUE	2007-12-17	marine metagenome	GAZ:Panama	A1768_016A4_GA4_01_14010.mzXML	0	PAP17DEC07.2 Lyngbya or Leptolyngbya	FALSE	0	ENVO:marine biome	ENVO:sea water	ENVO:organic material	Lyngbya or Leptolyngbya	G	TRUE	TRUE	Lyngbya or Leptolyngbya	cyanobacteria	A1768.016A4.GA4.01.14010	1117	9.56097	-79.6846	UCSD	UCSDMI	TRUE	FALSE	completed	UCSD	cyanobacteria	408172	Cyanobacteria	PAP
10125.A1768.016A5.GA5.01.14011.mzXML	0	A1768_016A5_GA5_01_14011.mzXML	TRUE	2007-12-17	marine metagenome	GAZ:Panama	A1768_016A5_GA5_01_14011.mzXML	0	PAP17DEC07.2 Lyngbya or Leptolyngbya	FALSE	0	ENVO:marine biome	ENVO:sea water	ENVO:organic material	Lyngbya or Leptolyngbya	H	TRUE	TRUE	Lyngbya or Leptolyngbya	cyanobacteria	A1768.016A5.GA5.01.14011	1117	9.56097	-79.6846	UCSD	UCSDMI	TRUE	FALSE	completed	UCSD	cyanobacteria	408172	Cyanobacteria	PAP
10125.A1768.016A6.GA6.01.14012.mzXML	0	A1768_016A6_GA6_01_14012.mzXML	TRUE	2007-12-17	marine metagenome	GAZ:Panama	A1768_016A6_GA6_01_14012.mzXML	0	PAP17DEC07.2 Lyngbya or Leptolyngbya	FALSE	0	ENVO:marine biome	ENVO:sea water	ENVO:organic material	Lyngbya or Leptolyngbya	I	TRUE	TRUE	Lyngbya or Leptolyngbya	cyanobacteria	A1768.016A6.GA6.01.14012	1117	9.56097	-79.6846	UCSD	UCSDMI	TRUE	FALSE	completed	UCSD	cyanobacteria	408172	Cyanobacteria	PAP
10125.A1769.016A10.GA10.01.14023.mzXML	0	A1769_016A10_GA10_01_14023.mzXML	TRUE	2007-12-17	marine metagenome	GAZ:Panama	A1769_016A10_GA10_01_14023.mzXML	0	PAP17DEC07.1 red lyngbya	FALSE	0	ENVO:marine biome	ENVO:sea water	ENVO:organic material	red lyngbya	C	TRUE	TRUE	red lyngbya	cyanobacteria	A1769.016A10.GA10.01.14023	1117	9.56097	-79.6846	UCSD	UCSDMI	TRUE	FALSE	completed	UCSD	cyanobacteria	408172	Cyanobacteria	PAP
10125.A1769.016A11.GA11.01.14024.mzXML	0	A1769_016A11_GA11_01_14024.mzXML	TRUE	2007-12-17	marine metagenome	GAZ:Panama	A1769_016A11_GA11_01_14024.mzXML	0	PAP17DEC07.1 red lyngbya	FALSE	0	ENVO:marine biome	ENVO:sea water	ENVO:organic material	red lyngbya	D	TRUE	TRUE	red lyngbya	cyanobacteria	A1769.016A11.GA11.01.14024	1117	9.56097	-79.6846	UCSD	UCSDMI	TRUE	FALSE	completed	UCSD	cyanobacteria	408172	Cyanobacteria	PAP
10125.A1769.016A7.GA7.01.14020.mzXML	0	A1769_016A7_GA7_01_14020.mzXML	TRUE	2007-12-17	marine metagenome	GAZ:Panama	A1769_016A7_GA7_01_14020.mzXML	0	PAP17DEC07.1 red lyngbya	FALSE	0	ENVO:marine biome	ENVO:sea water	ENVO:organic material	red lyngbya	Crude	TRUE	TRUE	red lyngbya	cyanobacteria	A1769.016A7.GA7.01.14020	1117	9.56097	-79.6846	UCSD	UCSDMI	TRUE	FALSE	completed	UCSD	cyanobacteria	408172	Cyanobacteria	PAP
10125.A1769.016A8.GA8.01.14021.mzXML	0	A1769_016A8_GA8_01_14021.mzXML	TRUE	2007-12-17	marine metagenome	GAZ:Panama	A1769_016A8_GA8_01_14021.mzXML	0	PAP17DEC07.1 red lyngbya	FALSE	0	ENVO:marine biome	ENVO:sea water	ENVO:organic material	red lyngbya	A	TRUE	TRUE	red lyngbya	cyanobacteria	A1769.016A8.GA8.01.14021	1117	9.56097	-79.6846	UCSD	UCSDMI	TRUE	FALSE	completed	UCSD	cyanobacteria	408172	Cyanobacteria	PAP
10125.A1769.016A9.GA9.01.14022.mzXML	0	A1769_016A9_GA9_01_14022.mzXML	TRUE	2007-12-17	marine metagenome	GAZ:Panama	A1769_016A9_GA9_01_14022.mzXML	0	PAP17DEC07.1 red lyngbya	FALSE	0	ENVO:marine biome	ENVO:sea water	ENVO:organic material	red lyngbya	B	TRUE	TRUE	red lyngbya	cyanobacteria	A1769.016A9.GA9.01.14022	1117	9.56097	-79.6846	UCSD	UCSDMI	TRUE	FALSE	completed	UCSD	cyanobacteria	408172	Cyanobacteria	PAP
10125.A1769.016B1.GB1.01.14025.mzXML	0	A1769_016B1_GB1_01_14025.mzXML	TRUE	2007-12-17	marine metagenome	GAZ:Panama	A1769_016B1_GB1_01_14025.mzXML	0	PAP17DEC07.1 red lyngbya	FALSE	0	ENVO:marine biome	ENVO:sea water	ENVO:organic material	red lyngbya	E	TRUE	TRUE	red lyngbya	cyanobacteria	A1769.016B1.GB1.01.14025	1117	9.56097	-79.6846	UCSD	UCSDMI	TRUE	FALSE	completed	UCSD	cyanobacteria	408172	Cyanobacteria	PAP
10125.A1769.016B2.GB2.01.14026.mzXML	0	A1769_016B2_GB2_01_14026.mzXML	TRUE	2007-12-17	marine metagenome	GAZ:Panama	A1769_016B2_GB2_01_14026.mzXML	0	PAP17DEC07.1 red lyngbya	FALSE	0	ENVO:marine biome	ENVO:sea water	ENVO:organic material	red lyngbya	F	TRUE	TRUE	red lyngbya	cyanobacteria	A1769.016B2.GB2.01.14026	1117	9.56097	-79.6846	UCSD	UCSDMI	TRUE	FALSE	completed	UCSD	cyanobacteria	408172	Cyanobacteria	PAP
10125.A1769.016B3.GB3.01.14027.mzXML	0	A1769_016B3_GB3_01_14027.mzXML	TRUE	2007-12-17	marine metagenome	GAZ:Panama	A1769_016B3_GB3_01_14027.mzXML	0	PAP17DEC07.1 red lyngbya	FALSE	0	ENVO:marine biome	ENVO:sea water	ENVO:organic material	red lyngbya	G	TRUE	TRUE	red lyngbya	cyanobacteria	A1769.016B3.GB3.01.14027	1117	9.56097	-79.6846	UCSD	UCSDMI	TRUE	FALSE	completed	UCSD	cyanobacteria	408172	Cyanobacteria	PAP
10125.A1772.016B10.GB10.01.14037.mzXML	0	A1772_016B10_GB10_01_14037.mzXML	TRUE	2008-05-25	marine metagenome	GAZ:Panama	A1772_016B10_GB10_01_14037.mzXML	0	PAP25MAY08.4 unknown	FALSE	0	ENVO:marine biome	ENVO:sea water	ENVO:organic material	other	D	TRUE	TRUE	other	other	A1772.016B10.GB10.01.14037	408172	9.617	-79.6005	UCSD	UCSDMI	TRUE	FALSE	completed	UCSD	cyanobacteria	408172	Cyanobacteria	PAP
10125.A1772.016B11.GB11.01.14038.mzXML	0	A1772_016B11_GB11_01_14038.mzXML	TRUE	2008-05-25	marine metagenome	GAZ:Panama	A1772_016B11_GB11_01_14038.mzXML	0	PAP25MAY08.4 unknown	FALSE	0	ENVO:marine biome	ENVO:sea water	ENVO:organic material	other	E	TRUE	TRUE	other	other	A1772.016B11.GB11.01.14038	408172	9.617	-79.6005	UCSD	UCSDMI	TRUE	FALSE	completed	UCSD	cyanobacteria	408172	Cyanobacteria	PAP
10125.A1772.016B6.GB6.01.14033.mzXML	0	A1772_016B6_GB6_01_14033.mzXML	TRUE	2008-05-25	marine metagenome	GAZ:Panama	A1772_016B6_GB6_01_14033.mzXML	0	PAP25MAY08.4 unknown	FALSE	0	ENVO:marine biome	ENVO:sea water	ENVO:organic material	other	Crude	TRUE	TRUE	other	other	A1772.016B6.GB6.01.14033	408172	9.617	-79.6005	UCSD	UCSDMI	TRUE	FALSE	completed	UCSD	cyanobacteria	408172	Cyanobacteria	PAP
10125.A1772.016B7.GB7.01.14034.mzXML	0	A1772_016B7_GB7_01_14034.mzXML	TRUE	2008-05-25	marine metagenome	GAZ:Panama	A1772_016B7_GB7_01_14034.mzXML	0	PAP25MAY08.4 unknown	FALSE	0	ENVO:marine biome	ENVO:sea water	ENVO:organic material	other	A	TRUE	TRUE	other	other	A1772.016B7.GB7.01.14034	408172	9.617	-79.6005	UCSD	UCSDMI	TRUE	FALSE	completed	UCSD	cyanobacteria	408172	Cyanobacteria	PAP
10125.A1772.016B8.GB8.01.14035.mzXML	0	A1772_016B8_GB8_01_14035.mzXML	TRUE	2008-05-25	marine metagenome	GAZ:Panama	A1772_016B8_GB8_01_14035.mzXML	0	PAP25MAY08.4 unknown	FALSE	0	ENVO:marine biome	ENVO:sea water	ENVO:organic material	other	B	TRUE	TRUE	other	other	A1772.016B8.GB8.01.14035	408172	9.617	-79.6005	UCSD	UCSDMI	TRUE	FALSE	completed	UCSD	cyanobacteria	408172	Cyanobacteria	PAP
10125.A1772.016B9.GB9.01.14036.mzXML	0	A1772_016B9_GB9_01_14036.mzXML	TRUE	2008-05-25	marine metagenome	GAZ:Panama	A1772_016B9_GB9_01_14036.mzXML	0	PAP25MAY08.4 unknown	FALSE	0	ENVO:marine biome	ENVO:sea water	ENVO:organic material	other	C	TRUE	TRUE	other	other	A1772.016B9.GB9.01.14036	408172	9.617	-79.6005	UCSD	UCSDMI	TRUE	FALSE	completed	UCSD	cyanobacteria	408172	Cyanobacteria	PAP
10125.A1772.016C1.GC1.01.14039.mzXML	0	A1772_016C1_GC1_01_14039.mzXML	TRUE	2008-05-25	marine metagenome	GAZ:Panama	A1772_016C1_GC1_01_14039.mzXML	0	PAP25MAY08.4 unknown	FALSE	0	ENVO:marine biome	ENVO:sea water	ENVO:organic material	other	F	TRUE	TRUE	other	other	A1772.016C1.GC1.01.14039	408172	9.617	-79.6005	UCSD	UCSDMI	TRUE	FALSE	completed	UCSD	cyanobacteria	408172	Cyanobacteria	PAP
10125.A1772.016C2.GC2.01.14040.mzXML	0	A1772_016C2_GC2_01_14040.mzXML	TRUE	2008-05-25	marine metagenome	GAZ:Panama	A1772_016C2_GC2_01_14040.mzXML	0	PAP25MAY08.4 unknown	FALSE	0	ENVO:marine biome	ENVO:sea water	ENVO:organic material	other	G	TRUE	TRUE	other	other	A1772.016C2.GC2.01.14040	408172	9.617	-79.6005	UCSD	UCSDMI	TRUE	FALSE	completed	UCSD	cyanobacteria	408172	Cyanobacteria	PAP
10125.A1772.016C3.GC3.01.14041.mzXML	0	A1772_016C3_GC3_01_14041.mzXML	TRUE	2008-05-25	marine metagenome	GAZ:Panama	A1772_016C3_GC3_01_14041.mzXML	0	PAP25MAY08.4 unknown	FALSE	0	ENVO:marine biome	ENVO:sea water	ENVO:organic material	other	I	TRUE	TRUE	other	other	A1772.016C3.GC3.01.14041	408172	9.617	-79.6005	UCSD	UCSDMI	TRUE	FALSE	completed	UCSD	cyanobacteria	408172	Cyanobacteria	PAP
10125.A1773.016C10.GC10.01.14049.mzXML	0	A1773_016C10_GC10_01_14049.mzXML	TRUE	2008-06-14	marine metagenome	GAZ:Panama	A1773_016C10_GC10_01_14049.mzXML	0	PAP14JUN08.1 lynbya penicilliformis/schizothrix	FALSE	0	ENVO:marine biome	ENVO:sea water	ENVO:organic material	lynbya penicilliformis schizothrix	I	TRUE	TRUE	lynbya penicilliformis schizothrix	cyanobacteria	A1773.016C10.GC10.01.14049	1117	9.5628	-79.6956	UCSD	UCSDMI	TRUE	FALSE	completed	UCSD	cyanobacteria	408172	Cyanobacteria	PAP
10125.A1773.016C4.GC4.01.14043.mzXML	0	A1773_016C4_GC4_01_14043.mzXML	TRUE	2008-06-14	marine metagenome	GAZ:Panama	A1773_016C4_GC4_01_14043.mzXML	0	PAP14JUN08.1 lynbya penicilliformis/schizothrix	FALSE	0	ENVO:marine biome	ENVO:sea water	ENVO:organic material	lynbya penicilliformis schizothrix	Crude	TRUE	TRUE	lynbya penicilliformis schizothrix	cyanobacteria	A1773.016C4.GC4.01.14043	1117	9.5628	-79.6956	UCSD	UCSDMI	TRUE	FALSE	completed	UCSD	cyanobacteria	408172	Cyanobacteria	PAP
10125.A1773.016C5.GC5.01.14044.mzXML	0	A1773_016C5_GC5_01_14044.mzXML	TRUE	2008-06-14	marine metagenome	GAZ:Panama	A1773_016C5_GC5_01_14044.mzXML	0	PAP14JUN08.1 lynbya penicilliformis/schizothrix	FALSE	0	ENVO:marine biome	ENVO:sea water	ENVO:organic material	lynbya penicilliformis schizothrix	A	TRUE	TRUE	lynbya penicilliformis schizothrix	cyanobacteria	A1773.016C5.GC5.01.14044	1117	9.5628	-79.6956	UCSD	UCSDMI	TRUE	FALSE	completed	UCSD	cyanobacteria	408172	Cyanobacteria	PAP
10125.A1773.016C6.GC6.01.14045.mzXML	0	A1773_016C6_GC6_01_14045.mzXML	TRUE	2008-06-14	marine metagenome	GAZ:Panama	A1773_016C6_GC6_01_14045.mzXML	0	PAP14JUN08.1 lynbya penicilliformis/schizothrix	FALSE	0	ENVO:marine biome	ENVO:sea water	ENVO:organic material	lynbya penicilliformis schizothrix	B	TRUE	TRUE	lynbya penicilliformis schizothrix	cyanobacteria	A1773.016C6.GC6.01.14045	1117	9.5628	-79.6956	UCSD	UCSDMI	TRUE	FALSE	completed	UCSD	cyanobacteria	408172	Cyanobacteria	PAP
10125.A1773.016C7.GC7.01.14046.mzXML	0	A1773_016C7_GC7_01_14046.mzXML	TRUE	2008-06-14	marine metagenome	GAZ:Panama	A1773_016C7_GC7_01_14046.mzXML	0	PAP14JUN08.1 lynbya penicilliformis/schizothrix	FALSE	0	ENVO:marine biome	ENVO:sea water	ENVO:organic material	lynbya penicilliformis schizothrix	C	TRUE	TRUE	lynbya penicilliformis schizothrix	cyanobacteria	A1773.016C7.GC7.01.14046	1117	9.5628	-79.6956	UCSD	UCSDMI	TRUE	FALSE	completed	UCSD	cyanobacteria	408172	Cyanobacteria	PAP
10125.A1773.016C8.GC8.01.14047.mzXML	0	A1773_016C8_GC8_01_14047.mzXML	TRUE	2008-06-14	marine metagenome	GAZ:Panama	A1773_016C8_GC8_01_14047.mzXML	0	PAP14JUN08.1 lynbya penicilliformis/schizothrix	FALSE	0	ENVO:marine biome	ENVO:sea water	ENVO:organic material	lynbya penicilliformis schizothrix	D	TRUE	TRUE	lynbya penicilliformis schizothrix	cyanobacteria	A1773.016C8.GC8.01.14047	1117	9.5628	-79.6956	UCSD	UCSDMI	TRUE	FALSE	completed	UCSD	cyanobacteria	408172	Cyanobacteria	PAP
10125.A1773.016C9.GC9.01.14048.mzXML	0	A1773_016C9_GC9_01_14048.mzXML	TRUE	2008-06-14	marine metagenome	GAZ:Panama	A1773_016C9_GC9_01_14048.mzXML	0	PAP14JUN08.1 lynbya penicilliformis/schizothrix	FALSE	0	ENVO:marine biome	ENVO:sea water	ENVO:organic material	lynbya penicilliformis schizothrix	H	TRUE	TRUE	lynbya penicilliformis schizothrix	cyanobacteria	A1773.016C9.GC9.01.14048	1117	9.5628	-79.6956	UCSD	UCSDMI	TRUE	FALSE	completed	UCSD	cyanobacteria	408172	Cyanobacteria	PAP
10125.A1774.016C11.GC11.01.14051.mzXML	0	A1774_016C11_GC11_01_14051.mzXML	TRUE	2008-05-24	marine metagenome	GAZ:Panama	A1774_016C11_GC11_01_14051.mzXML	0	PAP24MAY08.3 lyngbya semiplena	FALSE	0	ENVO:marine biome	ENVO:sea water	ENVO:organic material	lyngbya semiplena	Crude	TRUE	TRUE	lyngbya semiplena	cyanobacteria	A1774.016C11.GC11.01.14051	1117	9.6321	-79.56	UCSD	UCSDMI	TRUE	FALSE	completed	UCSD	cyanobacteria	408172	Cyanobacteria	PAP
10125.A1774.016D1.GD1.01.14052.mzXML	0	A1774_016D1_GD1_01_14052.mzXML	TRUE	2008-05-24	marine metagenome	GAZ:Panama	A1774_016D1_GD1_01_14052.mzXML	0	PAP24MAY08.3 lyngbya semiplena	FALSE	0	ENVO:marine biome	ENVO:sea water	ENVO:organic material	lyngbya semiplena	A	TRUE	TRUE	lyngbya semiplena	cyanobacteria	A1774.016D1.GD1.01.14052	1117	9.6321	-79.56	UCSD	UCSDMI	TRUE	FALSE	completed	UCSD	cyanobacteria	408172	Cyanobacteria	PAP
10125.A1774.016D2.GD2.01.14053.mzXML	0	A1774_016D2_GD2_01_14053.mzXML	TRUE	2008-05-24	marine metagenome	GAZ:Panama	A1774_016D2_GD2_01_14053.mzXML	0	PAP24MAY08.3 lyngbya semiplena	FALSE	0	ENVO:marine biome	ENVO:sea water	ENVO:organic material	lyngbya semiplena	B	TRUE	TRUE	lyngbya semiplena	cyanobacteria	A1774.016D2.GD2.01.14053	1117	9.6321	-79.56	UCSD	UCSDMI	TRUE	FALSE	completed	UCSD	cyanobacteria	408172	Cyanobacteria	PAP
10125.A1774.016D3.GD3.01.14054.mzXML	0	A1774_016D3_GD3_01_14054.mzXML	TRUE	2008-05-24	marine metagenome	GAZ:Panama	A1774_016D3_GD3_01_14054.mzXML	0	PAP24MAY08.3 lyngbya semiplena	FALSE	0	ENVO:marine biome	ENVO:sea water	ENVO:organic material	lyngbya semiplena	C	TRUE	TRUE	lyngbya semiplena	cyanobacteria	A1774.016D3.GD3.01.14054	1117	9.6321	-79.56	UCSD	UCSDMI	TRUE	FALSE	completed	UCSD	cyanobacteria	408172	Cyanobacteria	PAP
10125.A1774.016D4.GD4.01.14055.mzXML	0	A1774_016D4_GD4_01_14055.mzXML	TRUE	2008-05-24	marine metagenome	GAZ:Panama	A1774_016D4_GD4_01_14055.mzXML	0	PAP24MAY08.3 lyngbya semiplena	FALSE	0	ENVO:marine biome	ENVO:sea water	ENVO:organic material	lyngbya semiplena	D	TRUE	TRUE	lyngbya semiplena	cyanobacteria	A1774.016D4.GD4.01.14055	1117	9.6321	-79.56	UCSD	UCSDMI	TRUE	FALSE	completed	UCSD	cyanobacteria	408172	Cyanobacteria	PAP
10125.A1774.016D5.GD5.01.14056.mzXML	0	A1774_016D5_GD5_01_14056.mzXML	TRUE	2008-05-24	marine metagenome	GAZ:Panama	A1774_016D5_GD5_01_14056.mzXML	0	PAP24MAY08.3 lyngbya semiplena	FALSE	0	ENVO:marine biome	ENVO:sea water	ENVO:organic material	lyngbya semiplena	E	TRUE	TRUE	lyngbya semiplena	cyanobacteria	A1774.016D5.GD5.01.14056	1117	9.6321	-79.56	UCSD	UCSDMI	TRUE	FALSE	completed	UCSD	cyanobacteria	408172	Cyanobacteria	PAP
10125.A1774.016D6.GD6.01.14057.mzXML	0	A1774_016D6_GD6_01_14057.mzXML	TRUE	2008-05-24	marine metagenome	GAZ:Panama	A1774_016D6_GD6_01_14057.mzXML	0	PAP24MAY08.3 lyngbya semiplena	FALSE	0	ENVO:marine biome	ENVO:sea water	ENVO:organic material	lyngbya semiplena	F	TRUE	TRUE	lyngbya semiplena	cyanobacteria	A1774.016D6.GD6.01.14057	1117	9.6321	-79.56	UCSD	UCSDMI	TRUE	FALSE	completed	UCSD	cyanobacteria	408172	Cyanobacteria	PAP
10125.A1774.016D7.GD7.01.14058.mzXML	0	A1774_016D7_GD7_01_14058.mzXML	TRUE	2008-05-24	marine metagenome	GAZ:Panama	A1774_016D7_GD7_01_14058.mzXML	0	PAP24MAY08.3 lyngbya semiplena	FALSE	0	ENVO:marine biome	ENVO:sea water	ENVO:organic material	lyngbya semiplena	G	TRUE	TRUE	lyngbya semiplena	cyanobacteria	A1774.016D7.GD7.01.14058	1117	9.6321	-79.56	UCSD	UCSDMI	TRUE	FALSE	completed	UCSD	cyanobacteria	408172	Cyanobacteria	PAP
10125.A1774.016D8.GD8.01.14059.mzXML	0	A1774_016D8_GD8_01_14059.mzXML	TRUE	2008-05-24	marine metagenome	GAZ:Panama	A1774_016D8_GD8_01_14059.mzXML	0	PAP24MAY08.3 lyngbya semiplena	FALSE	0	ENVO:marine biome	ENVO:sea water	ENVO:organic material	lyngbya semiplena	H	TRUE	TRUE	lyngbya semiplena	cyanobacteria	A1774.016D8.GD8.01.14059	1117	9.6321	-79.56	UCSD	UCSDMI	TRUE	FALSE	completed	UCSD	cyanobacteria	408172	Cyanobacteria	PAP
10125.A1774.016D9.GD9.01.14060.mzXML	0	A1774_016D9_GD9_01_14060.mzXML	TRUE	2008-05-24	marine metagenome	GAZ:Panama	A1774_016D9_GD9_01_14060.mzXML	0	PAP24MAY08.3 lyngbya semiplena	FALSE	0	ENVO:marine biome	ENVO:sea water	ENVO:organic material	lyngbya semiplena	I	TRUE	TRUE	lyngbya semiplena	cyanobacteria	A1774.016D9.GD9.01.14060	1117	9.6321	-79.56	UCSD	UCSDMI	TRUE	FALSE	completed	UCSD	cyanobacteria	408172	Cyanobacteria	PAP
10125.A1775.016D10.GD10.01.14062.mzXML	0	A1775_016D10_GD10_01_14062.mzXML	TRUE	2008-05-24	marine metagenome	GAZ:Panama	A1775_016D10_GD10_01_14062.mzXML	0	PAP24MAY08.4 lyngbya sp.	FALSE	0	ENVO:marine biome	ENVO:sea water	ENVO:organic material	lyngbya sp.	Crude	TRUE	TRUE	lyngbya sp.	cyanobacteria	A1775.016D10.GD10.01.14062	1117	9.6321	-79.56	UCSD	UCSDMI	TRUE	FALSE	completed	UCSD	cyanobacteria	408172	Cyanobacteria	PAP
10125.A1775.016D11.GD11.01.14063.mzXML	0	A1775_016D11_GD11_01_14063.mzXML	TRUE	2008-05-24	marine metagenome	GAZ:Panama	A1775_016D11_GD11_01_14063.mzXML	0	PAP24MAY08.4 lyngbya sp.	FALSE	0	ENVO:marine biome	ENVO:sea water	ENVO:organic material	lyngbya sp.	A	TRUE	TRUE	lyngbya sp.	cyanobacteria	A1775.016D11.GD11.01.14063	1117	9.6321	-79.56	UCSD	UCSDMI	TRUE	FALSE	completed	UCSD	cyanobacteria	408172	Cyanobacteria	PAP
10125.A1775.016E1.GE1.01.14064.mzXML	0	A1775_016E1_GE1_01_14064.mzXML	TRUE	2008-05-24	marine metagenome	GAZ:Panama	A1775_016E1_GE1_01_14064.mzXML	0	PAP24MAY08.4 lyngbya sp.	FALSE	0	ENVO:marine biome	ENVO:sea water	ENVO:organic material	lyngbya sp.	B	TRUE	TRUE	lyngbya sp.	cyanobacteria	A1775.016E1.GE1.01.14064	1117	9.6321	-79.56	UCSD	UCSDMI	TRUE	FALSE	completed	UCSD	cyanobacteria	408172	Cyanobacteria	PAP
10125.A1775.016E2.GE2.01.14065.mzXML	0	A1775_016E2_GE2_01_14065.mzXML	TRUE	2008-05-24	marine metagenome	GAZ:Panama	A1775_016E2_GE2_01_14065.mzXML	0	PAP24MAY08.4 lyngbya sp.	FALSE	0	ENVO:marine biome	ENVO:sea water	ENVO:organic material	lyngbya sp.	C	TRUE	TRUE	lyngbya sp.	cyanobacteria	A1775.016E2.GE2.01.14065	1117	9.6321	-79.56	UCSD	UCSDMI	TRUE	FALSE	completed	UCSD	cyanobacteria	408172	Cyanobacteria	PAP
10125.A1775.016E3.GE3.01.14066.mzXML	0	A1775_016E3_GE3_01_14066.mzXML	TRUE	2008-05-24	marine metagenome	GAZ:Panama	A1775_016E3_GE3_01_14066.mzXML	0	PAP24MAY08.4 lyngbya sp.	FALSE	0	ENVO:marine biome	ENVO:sea water	ENVO:organic material	lyngbya sp.	D	TRUE	TRUE	lyngbya sp.	cyanobacteria	A1775.016E3.GE3.01.14066	1117	9.6321	-79.56	UCSD	UCSDMI	TRUE	FALSE	completed	UCSD	cyanobacteria	408172	Cyanobacteria	PAP
10125.A1775.016E4.GE4.01.14067.mzXML	0	A1775_016E4_GE4_01_14067.mzXML	TRUE	2008-05-24	marine metagenome	GAZ:Panama	A1775_016E4_GE4_01_14067.mzXML	0	PAP24MAY08.4 lyngbya sp.	FALSE	0	ENVO:marine biome	ENVO:sea water	ENVO:organic material	lyngbya sp.	E	TRUE	TRUE	lyngbya sp.	cyanobacteria	A1775.016E4.GE4.01.14067	1117	9.6321	-79.56	UCSD	UCSDMI	TRUE	FALSE	completed	UCSD	cyanobacteria	408172	Cyanobacteria	PAP
10125.A1775.016E5.GE5.01.14068.mzXML	0	A1775_016E5_GE5_01_14068.mzXML	TRUE	2008-05-24	marine metagenome	GAZ:Panama	A1775_016E5_GE5_01_14068.mzXML	0	PAP24MAY08.4 lyngbya sp.	FALSE	0	ENVO:marine biome	ENVO:sea water	ENVO:organic material	lyngbya sp.	F	TRUE	TRUE	lyngbya sp.	cyanobacteria	A1775.016E5.GE5.01.14068	1117	9.6321	-79.56	UCSD	UCSDMI	TRUE	FALSE	completed	UCSD	cyanobacteria	408172	Cyanobacteria	PAP
10125.A1775.016E6.GE6.01.14069.mzXML	0	A1775_016E6_GE6_01_14069.mzXML	TRUE	2008-05-24	marine metagenome	GAZ:Panama	A1775_016E6_GE6_01_14069.mzXML	0	PAP24MAY08.4 lyngbya sp.	FALSE	0	ENVO:marine biome	ENVO:sea water	ENVO:organic material	lyngbya sp.	G	TRUE	TRUE	lyngbya sp.	cyanobacteria	A1775.016E6.GE6.01.14069	1117	9.6321	-79.56	UCSD	UCSDMI	TRUE	FALSE	completed	UCSD	cyanobacteria	408172	Cyanobacteria	PAP
10125.A1775.016E7.GE7.01.14070.mzXML	0	A1775_016E7_GE7_01_14070.mzXML	TRUE	2008-05-24	marine metagenome	GAZ:Panama	A1775_016E7_GE7_01_14070.mzXML	0	PAP24MAY08.4 lyngbya sp.	FALSE	0	ENVO:marine biome	ENVO:sea water	ENVO:organic material	lyngbya sp.	H	TRUE	TRUE	lyngbya sp.	cyanobacteria	A1775.016E7.GE7.01.14070	1117	9.6321	-79.56	UCSD	UCSDMI	TRUE	FALSE	completed	UCSD	cyanobacteria	408172	Cyanobacteria	PAP
10125.A1775.016E8.GE8.01.14071.mzXML	0	A1775_016E8_GE8_01_14071.mzXML	TRUE	2008-05-24	marine metagenome	GAZ:Panama	A1775_016E8_GE8_01_14071.mzXML	0	PAP24MAY08.4 lyngbya sp.	FALSE	0	ENVO:marine biome	ENVO:sea water	ENVO:organic material	lyngbya sp.	I	TRUE	TRUE	lyngbya sp.	cyanobacteria	A1775.016E8.GE8.01.14071	1117	9.6321	-79.56	UCSD	UCSDMI	TRUE	FALSE	completed	UCSD	cyanobacteria	408172	Cyanobacteria	PAP
10125.A1776.016E10.GE10.01.14074.mzXML	0	A1776_016E10_GE10_01_14074.mzXML	TRUE	2008-06-14	marine metagenome	GAZ:Panama	A1776_016E10_GE10_01_14074.mzXML	0	PAP14JUN08.2 lyngbya sp.	FALSE	0	ENVO:marine biome	ENVO:sea water	ENVO:organic material	lyngbya sp.	B	TRUE	TRUE	lyngbya sp.	cyanobacteria	A1776.016E10.GE10.01.14074	1117	9.5628	-79.6956	UCSD	UCSDMI	TRUE	FALSE	completed	UCSD	cyanobacteria	408172	Cyanobacteria	PAP
10125.A1776.016E11.GE11.01.14075.mzXML	0	A1776_016E11_GE11_01_14075.mzXML	TRUE	2008-06-14	marine metagenome	GAZ:Panama	A1776_016E11_GE11_01_14075.mzXML	0	PAP14JUN08.2 lyngbya sp.	FALSE	0	ENVO:marine biome	ENVO:sea water	ENVO:organic material	lyngbya sp.	C	TRUE	TRUE	lyngbya sp.	cyanobacteria	A1776.016E11.GE11.01.14075	1117	9.5628	-79.6956	UCSD	UCSDMI	TRUE	FALSE	completed	UCSD	cyanobacteria	408172	Cyanobacteria	PAP
10125.A1776.016E9.GE9.01.14073.mzXML	0	A1776_016E9_GE9_01_14073.mzXML	TRUE	2008-06-14	marine metagenome	GAZ:Panama	A1776_016E9_GE9_01_14073.mzXML	0	PAP14JUN08.2 lyngbya sp.	FALSE	0	ENVO:marine biome	ENVO:sea water	ENVO:organic material	lyngbya sp.	A	TRUE	TRUE	lyngbya sp.	cyanobacteria	A1776.016E9.GE9.01.14073	1117	9.5628	-79.6956	UCSD	UCSDMI	TRUE	FALSE	completed	UCSD	cyanobacteria	408172	Cyanobacteria	PAP
10125.A1776.016F1.GF1.01.14076.mzXML	0	A1776_016F1_GF1_01_14076.mzXML	TRUE	2008-06-14	marine metagenome	GAZ:Panama	A1776_016F1_GF1_01_14076.mzXML	0	PAP14JUN08.2 lyngbya sp.	FALSE	0	ENVO:marine biome	ENVO:sea water	ENVO:organic material	lyngbya sp.	D	TRUE	TRUE	lyngbya sp.	cyanobacteria	A1776.016F1.GF1.01.14076	1117	9.5628	-79.6956	UCSD	UCSDMI	TRUE	FALSE	completed	UCSD	cyanobacteria	408172	Cyanobacteria	PAP
10125.A1776.016F2.GF2.01.14077.mzXML	0	A1776_016F2_GF2_01_14077.mzXML	TRUE	2008-06-14	marine metagenome	GAZ:Panama	A1776_016F2_GF2_01_14077.mzXML	0	PAP14JUN08.2 lyngbya sp.	FALSE	0	ENVO:marine biome	ENVO:sea water	ENVO:organic material	lyngbya sp.	E	TRUE	TRUE	lyngbya sp.	cyanobacteria	A1776.016F2.GF2.01.14077	1117	9.5628	-79.6956	UCSD	UCSDMI	TRUE	FALSE	completed	UCSD	cyanobacteria	408172	Cyanobacteria	PAP
10125.A1776.016F3.GF3.01.14078.mzXML	0	A1776_016F3_GF3_01_14078.mzXML	TRUE	2008-06-14	marine metagenome	GAZ:Panama	A1776_016F3_GF3_01_14078.mzXML	0	PAP14JUN08.2 lyngbya sp.	FALSE	0	ENVO:marine biome	ENVO:sea water	ENVO:organic material	lyngbya sp.	F	TRUE	TRUE	lyngbya sp.	cyanobacteria	A1776.016F3.GF3.01.14078	1117	9.5628	-79.6956	UCSD	UCSDMI	TRUE	FALSE	completed	UCSD	cyanobacteria	408172	Cyanobacteria	PAP
10125.A1776.016F4.GF4.01.14079.mzXML	0	A1776_016F4_GF4_01_14079.mzXML	TRUE	2008-06-14	marine metagenome	GAZ:Panama	A1776_016F4_GF4_01_14079.mzXML	0	PAP14JUN08.2 lyngbya sp.	FALSE	0	ENVO:marine biome	ENVO:sea water	ENVO:organic material	lyngbya sp.	G	TRUE	TRUE	lyngbya sp.	cyanobacteria	A1776.016F4.GF4.01.14079	1117	9.5628	-79.6956	UCSD	UCSDMI	TRUE	FALSE	completed	UCSD	cyanobacteria	408172	Cyanobacteria	PAP
10125.A1776.016F5.GF5.01.14080.mzXML	0	A1776_016F5_GF5_01_14080.mzXML	TRUE	2008-06-14	marine metagenome	GAZ:Panama	A1776_016F5_GF5_01_14080.mzXML	0	PAP14JUN08.2 lyngbya sp.	FALSE	0	ENVO:marine biome	ENVO:sea water	ENVO:organic material	lyngbya sp.	H	TRUE	TRUE	lyngbya sp.	cyanobacteria	A1776.016F5.GF5.01.14080	1117	9.5628	-79.6956	UCSD	UCSDMI	TRUE	FALSE	completed	UCSD	cyanobacteria	408172	Cyanobacteria	PAP
10125.A1776.016F6.GF6.01.14081.mzXML	0	A1776_016F6_GF6_01_14081.mzXML	TRUE	2008-06-14	marine metagenome	GAZ:Panama	A1776_016F6_GF6_01_14081.mzXML	0	PAP14JUN08.2 lyngbya sp.	FALSE	0	ENVO:marine biome	ENVO:sea water	ENVO:organic material	lyngbya sp.	I	TRUE	TRUE	lyngbya sp.	cyanobacteria	A1776.016F6.GF6.01.14081	1117	9.5628	-79.6956	UCSD	UCSDMI	TRUE	FALSE	completed	UCSD	cyanobacteria	408172	Cyanobacteria	PAP
10125.A1817.016F10.GF10.01.14086.mzXML	0	A1817_016F10_GF10_01_14086.mzXML	TRUE	2008-05-24	marine metagenome	GAZ:Panama	A1817_016F10_GF10_01_14086.mzXML	0	PAP24MAY08.5 calothrix sp.	FALSE	0	ENVO:marine biome	ENVO:sea water	ENVO:organic material	calothrix sp.	C	TRUE	TRUE	calothrix sp.	cyanobacteria	A1817.016F10.GF10.01.14086	1117	9.62753	-79.5687	UCSD	UCSDMI	TRUE	FALSE	completed	UCSD	cyanobacteria	408172	Cyanobacteria	PAP
10125.A1817.016F11.GF11.01.14087.mzXML	0	A1817_016F11_GF11_01_14087.mzXML	TRUE	2008-05-24	marine metagenome	GAZ:Panama	A1817_016F11_GF11_01_14087.mzXML	0	PAP24MAY08.5 calothrix sp.	FALSE	0	ENVO:marine biome	ENVO:sea water	ENVO:organic material	calothrix sp.	D	TRUE	TRUE	calothrix sp.	cyanobacteria	A1817.016F11.GF11.01.14087	1117	9.62753	-79.5687	UCSD	UCSDMI	TRUE	FALSE	completed	UCSD	cyanobacteria	408172	Cyanobacteria	PAP
10125.A1817.016F7.GF7.01.14083.mzXML	0	A1817_016F7_GF7_01_14083.mzXML	TRUE	2008-05-24	marine metagenome	GAZ:Panama	A1817_016F7_GF7_01_14083.mzXML	0	PAP24MAY08.5 calothrix sp.	FALSE	0	ENVO:marine biome	ENVO:sea water	ENVO:organic material	calothrix sp.	Crude	TRUE	TRUE	calothrix sp.	cyanobacteria	A1817.016F7.GF7.01.14083	1117	9.62753	-79.5687	UCSD	UCSDMI	TRUE	FALSE	completed	UCSD	cyanobacteria	408172	Cyanobacteria	PAP
10125.A1817.016F8.GF8.01.14084.mzXML	0	A1817_016F8_GF8_01_14084.mzXML	TRUE	2008-05-24	marine metagenome	GAZ:Panama	A1817_016F8_GF8_01_14084.mzXML	0	PAP24MAY08.5 calothrix sp.	FALSE	0	ENVO:marine biome	ENVO:sea water	ENVO:organic material	calothrix sp.	A	TRUE	TRUE	calothrix sp.	cyanobacteria	A1817.016F8.GF8.01.14084	1117	9.62753	-79.5687	UCSD	UCSDMI	TRUE	FALSE	completed	UCSD	cyanobacteria	408172	Cyanobacteria	PAP
10125.A1817.016F9.GF9.01.14085.mzXML	0	A1817_016F9_GF9_01_14085.mzXML	TRUE	2008-05-24	marine metagenome	GAZ:Panama	A1817_016F9_GF9_01_14085.mzXML	0	PAP24MAY08.5 calothrix sp.	FALSE	0	ENVO:marine biome	ENVO:sea water	ENVO:organic material	calothrix sp.	B	TRUE	TRUE	calothrix sp.	cyanobacteria	A1817.016F9.GF9.01.14085	1117	9.62753	-79.5687	UCSD	UCSDMI	TRUE	FALSE	completed	UCSD	cyanobacteria	408172	Cyanobacteria	PAP
10125.A1817.016G1.GG1.01.14088.mzXML	0	A1817_016G1_GG1_01_14088.mzXML	TRUE	2008-05-24	marine metagenome	GAZ:Panama	A1817_016G1_GG1_01_14088.mzXML	0	PAP24MAY08.5 calothrix sp.	FALSE	0	ENVO:marine biome	ENVO:sea water	ENVO:organic material	calothrix sp.	E	TRUE	TRUE	calothrix sp.	cyanobacteria	A1817.016G1.GG1.01.14088	1117	9.62753	-79.5687	UCSD	UCSDMI	TRUE	FALSE	completed	UCSD	cyanobacteria	408172	Cyanobacteria	PAP
10125.A1817.016G2.GG2.01.14089.mzXML	0	A1817_016G2_GG2_01_14089.mzXML	TRUE	2008-05-24	marine metagenome	GAZ:Panama	A1817_016G2_GG2_01_14089.mzXML	0	PAP24MAY08.5 calothrix sp.	FALSE	0	ENVO:marine biome	ENVO:sea water	ENVO:organic material	calothrix sp.	F	TRUE	TRUE	calothrix sp.	cyanobacteria	A1817.016G2.GG2.01.14089	1117	9.62753	-79.5687	UCSD	UCSDMI	TRUE	FALSE	completed	UCSD	cyanobacteria	408172	Cyanobacteria	PAP
10125.A1817.016G3.GG3.01.14090.mzXML	0	A1817_016G3_GG3_01_14090.mzXML	TRUE	2008-05-24	marine metagenome	GAZ:Panama	A1817_016G3_GG3_01_14090.mzXML	0	PAP24MAY08.5 calothrix sp.	FALSE	0	ENVO:marine biome	ENVO:sea water	ENVO:organic material	calothrix sp.	G	TRUE	TRUE	calothrix sp.	cyanobacteria	A1817.016G3.GG3.01.14090	1117	9.62753	-79.5687	UCSD	UCSDMI	TRUE	FALSE	completed	UCSD	cyanobacteria	408172	Cyanobacteria	PAP
10125.A1817.016G4.GG4.01.14091.mzXML	0	A1817_016G4_GG4_01_14091.mzXML	TRUE	2008-05-24	marine metagenome	GAZ:Panama	A1817_016G4_GG4_01_14091.mzXML	0	PAP24MAY08.5 calothrix sp.	FALSE	0	ENVO:marine biome	ENVO:sea water	ENVO:organic material	calothrix sp.	H	TRUE	TRUE	calothrix sp.	cyanobacteria	A1817.016G4.GG4.01.14091	1117	9.62753	-79.5687	UCSD	UCSDMI	TRUE	FALSE	completed	UCSD	cyanobacteria	408172	Cyanobacteria	PAP
10125.A1817.016G5.GG5.01.14092.mzXML	0	A1817_016G5_GG5_01_14092.mzXML	TRUE	2008-05-24	marine metagenome	GAZ:Panama	A1817_016G5_GG5_01_14092.mzXML	0	PAP24MAY08.5 calothrix sp.	FALSE	0	ENVO:marine biome	ENVO:sea water	ENVO:organic material	calothrix sp.	I	TRUE	TRUE	calothrix sp.	cyanobacteria	A1817.016G5.GG5.01.14092	1117	9.62753	-79.5687	UCSD	UCSDMI	TRUE	FALSE	completed	UCSD	cyanobacteria	408172	Cyanobacteria	PAP
10125.A1818.016G10.GG10.01.14098.mzXML	0	A1818_016G10_GG10_01_14098.mzXML	TRUE	2008-05-25	marine metagenome	GAZ:Panama	A1818_016G10_GG10_01_14098.mzXML	0	PAP25MAY08.2 Symploca probablesp.	FALSE	0	ENVO:marine biome	ENVO:sea water	ENVO:organic material	Symploca probablesp.	D	TRUE	TRUE	Symploca probablesp.	cyanobacteria	A1818.016G10.GG10.01.14098	1117	9.617	-79.6005	UCSD	UCSDMI	TRUE	FALSE	completed	UCSD	cyanobacteria	408172	Cyanobacteria	PAP
10125.A1818.016G11.GG11.01.14099.mzXML	0	A1818_016G11_GG11_01_14099.mzXML	TRUE	2008-05-25	marine metagenome	GAZ:Panama	A1818_016G11_GG11_01_14099.mzXML	0	PAP25MAY08.2 Symploca probablesp.	FALSE	0	ENVO:marine biome	ENVO:sea water	ENVO:organic material	Symploca probablesp.	E	TRUE	TRUE	Symploca probablesp.	cyanobacteria	A1818.016G11.GG11.01.14099	1117	9.617	-79.6005	UCSD	UCSDMI	TRUE	FALSE	completed	UCSD	cyanobacteria	408172	Cyanobacteria	PAP
10125.A1818.016G6.GG6.01.14094.mzXML	0	A1818_016G6_GG6_01_14094.mzXML	TRUE	2008-05-25	marine metagenome	GAZ:Panama	A1818_016G6_GG6_01_14094.mzXML	0	PAP25MAY08.2 Symploca probablesp.	FALSE	0	ENVO:marine biome	ENVO:sea water	ENVO:organic material	Symploca probablesp.	Crude	TRUE	TRUE	Symploca probablesp.	cyanobacteria	A1818.016G6.GG6.01.14094	1117	9.617	-79.6005	UCSD	UCSDMI	TRUE	FALSE	completed	UCSD	cyanobacteria	408172	Cyanobacteria	PAP
10125.A1818.016G7.GG7.01.14095.mzXML	0	A1818_016G7_GG7_01_14095.mzXML	TRUE	2008-05-25	marine metagenome	GAZ:Panama	A1818_016G7_GG7_01_14095.mzXML	0	PAP25MAY08.2 Symploca probablesp.	FALSE	0	ENVO:marine biome	ENVO:sea water	ENVO:organic material	Symploca probablesp.	A	TRUE	TRUE	Symploca probablesp.	cyanobacteria	A1818.016G7.GG7.01.14095	1117	9.617	-79.6005	UCSD	UCSDMI	TRUE	FALSE	completed	UCSD	cyanobacteria	408172	Cyanobacteria	PAP
10125.A1818.016G8.GG8.01.14096.mzXML	0	A1818_016G8_GG8_01_14096.mzXML	TRUE	2008-05-25	marine metagenome	GAZ:Panama	A1818_016G8_GG8_01_14096.mzXML	0	PAP25MAY08.2 Symploca probablesp.	FALSE	0	ENVO:marine biome	ENVO:sea water	ENVO:organic material	Symploca probablesp.	B	TRUE	TRUE	Symploca probablesp.	cyanobacteria	A1818.016G8.GG8.01.14096	1117	9.617	-79.6005	UCSD	UCSDMI	TRUE	FALSE	completed	UCSD	cyanobacteria	408172	Cyanobacteria	PAP
10125.A1818.016G9.GG9.01.14097.mzXML	0	A1818_016G9_GG9_01_14097.mzXML	TRUE	2008-05-25	marine metagenome	GAZ:Panama	A1818_016G9_GG9_01_14097.mzXML	0	PAP25MAY08.2 Symploca probablesp.	FALSE	0	ENVO:marine biome	ENVO:sea water	ENVO:organic material	Symploca probablesp.	C	TRUE	TRUE	Symploca probablesp.	cyanobacteria	A1818.016G9.GG9.01.14097	1117	9.617	-79.6005	UCSD	UCSDMI	TRUE	FALSE	completed	UCSD	cyanobacteria	408172	Cyanobacteria	PAP
10125.A1818.016H1.GH1.01.14100.mzXML	0	A1818_016H1_GH1_01_14100.mzXML	TRUE	2008-05-25	marine metagenome	GAZ:Panama	A1818_016H1_GH1_01_14100.mzXML	0	PAP25MAY08.2 Symploca probablesp.	FALSE	0	ENVO:marine biome	ENVO:sea water	ENVO:organic material	Symploca probablesp.	F	TRUE	TRUE	Symploca probablesp.	cyanobacteria	A1818.016H1.GH1.01.14100	1117	9.617	-79.6005	UCSD	UCSDMI	TRUE	FALSE	completed	UCSD	cyanobacteria	408172	Cyanobacteria	PAP
10125.A1818.016H2.GH2.01.14101.mzXML	0	A1818_016H2_GH2_01_14101.mzXML	TRUE	2008-05-25	marine metagenome	GAZ:Panama	A1818_016H2_GH2_01_14101.mzXML	0	PAP25MAY08.2 Symploca probablesp.	FALSE	0	ENVO:marine biome	ENVO:sea water	ENVO:organic material	Symploca probablesp.	G	TRUE	TRUE	Symploca probablesp.	cyanobacteria	A1818.016H2.GH2.01.14101	1117	9.617	-79.6005	UCSD	UCSDMI	TRUE	FALSE	completed	UCSD	cyanobacteria	408172	Cyanobacteria	PAP
10125.A1818.016H3.GH3.01.14102.mzXML	0	A1818_016H3_GH3_01_14102.mzXML	TRUE	2008-05-25	marine metagenome	GAZ:Panama	A1818_016H3_GH3_01_14102.mzXML	0	PAP25MAY08.2 Symploca probablesp.	FALSE	0	ENVO:marine biome	ENVO:sea water	ENVO:organic material	Symploca probablesp.	H	TRUE	TRUE	Symploca probablesp.	cyanobacteria	A1818.016H3.GH3.01.14102	1117	9.617	-79.6005	UCSD	UCSDMI	TRUE	FALSE	completed	UCSD	cyanobacteria	408172	Cyanobacteria	PAP
10125.A1818.016H4.GH4.01.14103.mzXML	0	A1818_016H4_GH4_01_14103.mzXML	TRUE	2008-05-25	marine metagenome	GAZ:Panama	A1818_016H4_GH4_01_14103.mzXML	0	PAP25MAY08.2 Symploca probablesp.	FALSE	0	ENVO:marine biome	ENVO:sea water	ENVO:organic material	Symploca probablesp.	I	TRUE	TRUE	Symploca probablesp.	cyanobacteria	A1818.016H4.GH4.01.14103	1117	9.617	-79.6005	UCSD	UCSDMI	TRUE	FALSE	completed	UCSD	cyanobacteria	408172	Cyanobacteria	PAP
10125.A1819.016H10.GH10.01.14110.mzXML	0	A1819_016H10_GH10_01_14110.mzXML	TRUE	2008-05-25	marine metagenome	GAZ:Panama	A1819_016H10_GH10_01_14110.mzXML	0	PAP25MAY08.7 spiracoleus sp.	FALSE	0	ENVO:marine biome	ENVO:sea water	ENVO:organic material	spiracoleus sp.	E	TRUE	TRUE	spiracoleus sp.	cyanobacteria	A1819.016H10.GH10.01.14110	408172	9.617	-79.6005	UCSD	UCSDMI	TRUE	FALSE	completed	UCSD	cyanobacteria	408172	Cyanobacteria	PAP
10125.A1819.016H11.GH11.01.14111.mzXML	0	A1819_016H11_GH11_01_14111.mzXML	TRUE	2008-05-25	marine metagenome	GAZ:Panama	A1819_016H11_GH11_01_14111.mzXML	0	PAP25MAY08.7 spiracoleus sp.	FALSE	0	ENVO:marine biome	ENVO:sea water	ENVO:organic material	spiracoleus sp.	F	TRUE	TRUE	spiracoleus sp.	cyanobacteria	A1819.016H11.GH11.01.14111	408172	9.617	-79.6005	UCSD	UCSDMI	TRUE	FALSE	completed	UCSD	cyanobacteria	408172	Cyanobacteria	PAP
10125.A1819.016H5.GH5.01.14105.mzXML	0	A1819_016H5_GH5_01_14105.mzXML	TRUE	2008-05-25	marine metagenome	GAZ:Panama	A1819_016H5_GH5_01_14105.mzXML	0	PAP25MAY08.7 spiracoleus sp.	FALSE	0	ENVO:marine biome	ENVO:sea water	ENVO:organic material	spiracoleus sp.	Crude	TRUE	TRUE	spiracoleus sp.	cyanobacteria	A1819.016H5.GH5.01.14105	408172	9.617	-79.6005	UCSD	UCSDMI	TRUE	FALSE	completed	UCSD	cyanobacteria	408172	Cyanobacteria	PAP
10125.A1819.016H6.GH6.01.14106.mzXML	0	A1819_016H6_GH6_01_14106.mzXML	TRUE	2008-05-25	marine metagenome	GAZ:Panama	A1819_016H6_GH6_01_14106.mzXML	0	PAP25MAY08.7 spiracoleus sp.	FALSE	0	ENVO:marine biome	ENVO:sea water	ENVO:organic material	spiracoleus sp.	A	TRUE	TRUE	spiracoleus sp.	cyanobacteria	A1819.016H6.GH6.01.14106	408172	9.617	-79.6005	UCSD	UCSDMI	TRUE	FALSE	completed	UCSD	cyanobacteria	408172	Cyanobacteria	PAP
10125.A1819.016H7.GH7.01.14107.mzXML	0	A1819_016H7_GH7_01_14107.mzXML	TRUE	2008-05-25	marine metagenome	GAZ:Panama	A1819_016H7_GH7_01_14107.mzXML	0	PAP25MAY08.7 spiracoleus sp.	FALSE	0	ENVO:marine biome	ENVO:sea water	ENVO:organic material	spiracoleus sp.	B	TRUE	TRUE	spiracoleus sp.	cyanobacteria	A1819.016H7.GH7.01.14107	408172	9.617	-79.6005	UCSD	UCSDMI	TRUE	FALSE	completed	UCSD	cyanobacteria	408172	Cyanobacteria	PAP
10125.A1819.016H8.GH8.01.14108.mzXML	0	A1819_016H8_GH8_01_14108.mzXML	TRUE	2008-05-25	marine metagenome	GAZ:Panama	A1819_016H8_GH8_01_14108.mzXML	0	PAP25MAY08.7 spiracoleus sp.	FALSE	0	ENVO:marine biome	ENVO:sea water	ENVO:organic material	spiracoleus sp.	C	TRUE	TRUE	spiracoleus sp.	cyanobacteria	A1819.016H8.GH8.01.14108	408172	9.617	-79.6005	UCSD	UCSDMI	TRUE	FALSE	completed	UCSD	cyanobacteria	408172	Cyanobacteria	PAP
10125.A1819.016H9.GH9.01.14109.mzXML	0	A1819_016H9_GH9_01_14109.mzXML	TRUE	2008-05-25	marine metagenome	GAZ:Panama	A1819_016H9_GH9_01_14109.mzXML	0	PAP25MAY08.7 spiracoleus sp.	FALSE	0	ENVO:marine biome	ENVO:sea water	ENVO:organic material	spiracoleus sp.	D	TRUE	TRUE	spiracoleus sp.	cyanobacteria	A1819.016H9.GH9.01.14109	408172	9.617	-79.6005	UCSD	UCSDMI	TRUE	FALSE	completed	UCSD	cyanobacteria	408172	Cyanobacteria	PAP
10125.A1819.017A1.RA1.01.14112.mzXML	0	A1819_017A1_RA1_01_14112.mzXML	TRUE	2008-05-25	marine metagenome	GAZ:Panama	A1819_017A1_RA1_01_14112.mzXML	0	PAP25MAY08.7 spiracoleus sp.	FALSE	0	ENVO:marine biome	ENVO:sea water	ENVO:organic material	spiracoleus sp.	G	TRUE	TRUE	spiracoleus sp.	cyanobacteria	A1819.017A1.RA1.01.14112	408172	9.617	-79.6005	UCSD	UCSDMI	TRUE	FALSE	completed	UCSD	cyanobacteria	408172	Cyanobacteria	PAP
10125.A1819.017A2.RA2.01.14113.mzXML	0	A1819_017A2_RA2_01_14113.mzXML	TRUE	2008-05-25	marine metagenome	GAZ:Panama	A1819_017A2_RA2_01_14113.mzXML	0	PAP25MAY08.7 spiracoleus sp.	FALSE	0	ENVO:marine biome	ENVO:sea water	ENVO:organic material	spiracoleus sp.	H	TRUE	TRUE	spiracoleus sp.	cyanobacteria	A1819.017A2.RA2.01.14113	408172	9.617	-79.6005	UCSD	UCSDMI	TRUE	FALSE	completed	UCSD	cyanobacteria	408172	Cyanobacteria	PAP
10125.A1819.017A3.RA3.01.14114.mzXML	0	A1819_017A3_RA3_01_14114.mzXML	TRUE	2008-05-25	marine metagenome	GAZ:Panama	A1819_017A3_RA3_01_14114.mzXML	0	PAP25MAY08.7 spiracoleus sp.	FALSE	0	ENVO:marine biome	ENVO:sea water	ENVO:organic material	spiracoleus sp.	I	TRUE	TRUE	spiracoleus sp.	cyanobacteria	A1819.017A3.RA3.01.14114	408172	9.617	-79.6005	UCSD	UCSDMI	TRUE	FALSE	completed	UCSD	cyanobacteria	408172	Cyanobacteria	PAP
10125.A1820.017A10.RA10.01.14122.mzXML	0	A1820_017A10_RA10_01_14122.mzXML	TRUE	2008-05-25	marine metagenome	GAZ:Panama	A1820_017A10_RA10_01_14122.mzXML	0	PAP25MAY08.6 wooly symploca	FALSE	0	ENVO:marine biome	ENVO:sea water	ENVO:organic material	wooly symploca	F	TRUE	TRUE	wooly symploca	cyanobacteria	A1820.017A10.RA10.01.14122	1117	9.617	-79.6005	UCSD	UCSDMI	TRUE	FALSE	completed	UCSD	cyanobacteria	408172	Cyanobacteria	PAP
10125.A1820.017A11.RA11.01.14123.mzXML	0	A1820_017A11_RA11_01_14123.mzXML	TRUE	2008-05-25	marine metagenome	GAZ:Panama	A1820_017A11_RA11_01_14123.mzXML	0	PAP25MAY08.6 wooly symploca	FALSE	0	ENVO:marine biome	ENVO:sea water	ENVO:organic material	wooly symploca	G	TRUE	TRUE	wooly symploca	cyanobacteria	A1820.017A11.RA11.01.14123	1117	9.617	-79.6005	UCSD	UCSDMI	TRUE	FALSE	completed	UCSD	cyanobacteria	408172	Cyanobacteria	PAP
10125.A1820.017A4.RA4.01.14116.mzXML	0	A1820_017A4_RA4_01_14116.mzXML	TRUE	2008-05-25	marine metagenome	GAZ:Panama	A1820_017A4_RA4_01_14116.mzXML	0	PAP25MAY08.6 wooly symploca	FALSE	0	ENVO:marine biome	ENVO:sea water	ENVO:organic material	wooly symploca	Crude	TRUE	TRUE	wooly symploca	cyanobacteria	A1820.017A4.RA4.01.14116	1117	9.617	-79.6005	UCSD	UCSDMI	TRUE	FALSE	completed	UCSD	cyanobacteria	408172	Cyanobacteria	PAP
10125.A1820.017A5.RA5.01.14117.mzXML	0	A1820_017A5_RA5_01_14117.mzXML	TRUE	2008-05-25	marine metagenome	GAZ:Panama	A1820_017A5_RA5_01_14117.mzXML	0	PAP25MAY08.6 wooly symploca	FALSE	0	ENVO:marine biome	ENVO:sea water	ENVO:organic material	wooly symploca	A	TRUE	TRUE	wooly symploca	cyanobacteria	A1820.017A5.RA5.01.14117	1117	9.617	-79.6005	UCSD	UCSDMI	TRUE	FALSE	completed	UCSD	cyanobacteria	408172	Cyanobacteria	PAP
10125.A1820.017A6.RA6.01.14118.mzXML	0	A1820_017A6_RA6_01_14118.mzXML	TRUE	2008-05-25	marine metagenome	GAZ:Panama	A1820_017A6_RA6_01_14118.mzXML	0	PAP25MAY08.6 wooly symploca	FALSE	0	ENVO:marine biome	ENVO:sea water	ENVO:organic material	wooly symploca	B	TRUE	TRUE	wooly symploca	cyanobacteria	A1820.017A6.RA6.01.14118	1117	9.617	-79.6005	UCSD	UCSDMI	TRUE	FALSE	completed	UCSD	cyanobacteria	408172	Cyanobacteria	PAP
10125.A1820.017A7.RA7.01.14119.mzXML	0	A1820_017A7_RA7_01_14119.mzXML	TRUE	2008-05-25	marine metagenome	GAZ:Panama	A1820_017A7_RA7_01_14119.mzXML	0	PAP25MAY08.6 wooly symploca	FALSE	0	ENVO:marine biome	ENVO:sea water	ENVO:organic material	wooly symploca	C	TRUE	TRUE	wooly symploca	cyanobacteria	A1820.017A7.RA7.01.14119	1117	9.617	-79.6005	UCSD	UCSDMI	TRUE	FALSE	completed	UCSD	cyanobacteria	408172	Cyanobacteria	PAP
10125.A1820.017A8.RA8.01.14120.mzXML	0	A1820_017A8_RA8_01_14120.mzXML	TRUE	2008-05-25	marine metagenome	GAZ:Panama	A1820_017A8_RA8_01_14120.mzXML	0	PAP25MAY08.6 wooly symploca	FALSE	0	ENVO:marine biome	ENVO:sea water	ENVO:organic material	wooly symploca	D	TRUE	TRUE	wooly symploca	cyanobacteria	A1820.017A8.RA8.01.14120	1117	9.617	-79.6005	UCSD	UCSDMI	TRUE	FALSE	completed	UCSD	cyanobacteria	408172	Cyanobacteria	PAP
10125.A1820.017A9.RA9.01.14121.mzXML	0	A1820_017A9_RA9_01_14121.mzXML	TRUE	2008-05-25	marine metagenome	GAZ:Panama	A1820_017A9_RA9_01_14121.mzXML	0	PAP25MAY08.6 wooly symploca	FALSE	0	ENVO:marine biome	ENVO:sea water	ENVO:organic material	wooly symploca	E	TRUE	TRUE	wooly symploca	cyanobacteria	A1820.017A9.RA9.01.14121	1117	9.617	-79.6005	UCSD	UCSDMI	TRUE	FALSE	completed	UCSD	cyanobacteria	408172	Cyanobacteria	PAP
10125.A1820.017B1.RB1.01.14124.mzXML	0	A1820_017B1_RB1_01_14124.mzXML	TRUE	2008-05-25	marine metagenome	GAZ:Panama	A1820_017B1_RB1_01_14124.mzXML	0	PAP25MAY08.6 wooly symploca	FALSE	0	ENVO:marine biome	ENVO:sea water	ENVO:organic material	wooly symploca	H	TRUE	TRUE	wooly symploca	cyanobacteria	A1820.017B1.RB1.01.14124	1117	9.617	-79.6005	UCSD	UCSDMI	TRUE	FALSE	completed	UCSD	cyanobacteria	408172	Cyanobacteria	PAP
10125.A1820.017B2.RB2.01.14125.mzXML	0	A1820_017B2_RB2_01_14125.mzXML	TRUE	2008-05-25	marine metagenome	GAZ:Panama	A1820_017B2_RB2_01_14125.mzXML	0	PAP25MAY08.6 wooly symploca	FALSE	0	ENVO:marine biome	ENVO:sea water	ENVO:organic material	wooly symploca	I	TRUE	TRUE	wooly symploca	cyanobacteria	A1820.017B2.RB2.01.14125	1117	9.617	-79.6005	UCSD	UCSDMI	TRUE	FALSE	completed	UCSD	cyanobacteria	408172	Cyanobacteria	PAP
10125.A1822.017B10.RB10.01.14135.mzXML	0	A1822_017B10_RB10_01_14135.mzXML	TRUE	2008-05-24	marine metagenome	GAZ:Panama	A1822_017B10_RB10_01_14135.mzXML	0	PAP24MAY08.6 spirocoleus sp.	FALSE	0	ENVO:marine biome	ENVO:sea water	ENVO:organic material	spirocoleus sp.	F	TRUE	TRUE	spirocoleus sp.	cyanobacteria	A1822.017B10.RB10.01.14135	1117	9.62753	-79.5687	UCSD	UCSDMI	TRUE	FALSE	completed	UCSD	cyanobacteria	408172	Cyanobacteria	PAP
10125.A1822.017B11.RB11.01.14136.mzXML	0	A1822_017B11_RB11_01_14136.mzXML	TRUE	2008-05-24	marine metagenome	GAZ:Panama	A1822_017B11_RB11_01_14136.mzXML	0	PAP24MAY08.6 spirocoleus sp.	FALSE	0	ENVO:marine biome	ENVO:sea water	ENVO:organic material	spirocoleus sp.	G	TRUE	TRUE	spirocoleus sp.	cyanobacteria	A1822.017B11.RB11.01.14136	1117	9.62753	-79.5687	UCSD	UCSDMI	TRUE	FALSE	completed	UCSD	cyanobacteria	408172	Cyanobacteria	PAP
10125.A1822.017B4.RB4.01.14129.mzXML	0	A1822_017B4_RB4_01_14129.mzXML	TRUE	2008-05-24	marine metagenome	GAZ:Panama	A1822_017B4_RB4_01_14129.mzXML	0	PAP24MAY08.6 spirocoleus sp.	FALSE	0	ENVO:marine biome	ENVO:sea water	ENVO:organic material	spirocoleus sp.	Crude	TRUE	TRUE	spirocoleus sp.	cyanobacteria	A1822.017B4.RB4.01.14129	1117	9.62753	-79.5687	UCSD	UCSDMI	TRUE	FALSE	completed	UCSD	cyanobacteria	408172	Cyanobacteria	PAP
10125.A1822.017B5.RB5.01.14130.mzXML	0	A1822_017B5_RB5_01_14130.mzXML	TRUE	2008-05-24	marine metagenome	GAZ:Panama	A1822_017B5_RB5_01_14130.mzXML	0	PAP24MAY08.6 spirocoleus sp.	FALSE	0	ENVO:marine biome	ENVO:sea water	ENVO:organic material	spirocoleus sp.	A	TRUE	TRUE	spirocoleus sp.	cyanobacteria	A1822.017B5.RB5.01.14130	1117	9.62753	-79.5687	UCSD	UCSDMI	TRUE	FALSE	completed	UCSD	cyanobacteria	408172	Cyanobacteria	PAP
10125.A1822.017B6.RB6.01.14131.mzXML	0	A1822_017B6_RB6_01_14131.mzXML	TRUE	2008-05-24	marine metagenome	GAZ:Panama	A1822_017B6_RB6_01_14131.mzXML	0	PAP24MAY08.6 spirocoleus sp.	FALSE	0	ENVO:marine biome	ENVO:sea water	ENVO:organic material	spirocoleus sp.	B	TRUE	TRUE	spirocoleus sp.	cyanobacteria	A1822.017B6.RB6.01.14131	1117	9.62753	-79.5687	UCSD	UCSDMI	TRUE	FALSE	completed	UCSD	cyanobacteria	408172	Cyanobacteria	PAP
10125.A1822.017B7.RB7.01.14132.mzXML	0	A1822_017B7_RB7_01_14132.mzXML	TRUE	2008-05-24	marine metagenome	GAZ:Panama	A1822_017B7_RB7_01_14132.mzXML	0	PAP24MAY08.6 spirocoleus sp.	FALSE	0	ENVO:marine biome	ENVO:sea water	ENVO:organic material	spirocoleus sp.	C	TRUE	TRUE	spirocoleus sp.	cyanobacteria	A1822.017B7.RB7.01.14132	1117	9.62753	-79.5687	UCSD	UCSDMI	TRUE	FALSE	completed	UCSD	cyanobacteria	408172	Cyanobacteria	PAP
10125.A1822.017B8.RB8.01.14133.mzXML	0	A1822_017B8_RB8_01_14133.mzXML	TRUE	2008-05-24	marine metagenome	GAZ:Panama	A1822_017B8_RB8_01_14133.mzXML	0	PAP24MAY08.6 spirocoleus sp.	FALSE	0	ENVO:marine biome	ENVO:sea water	ENVO:organic material	spirocoleus sp.	D	TRUE	TRUE	spirocoleus sp.	cyanobacteria	A1822.017B8.RB8.01.14133	1117	9.62753	-79.5687	UCSD	UCSDMI	TRUE	FALSE	completed	UCSD	cyanobacteria	408172	Cyanobacteria	PAP
10125.A1822.017B9.RB9.01.14134.mzXML	0	A1822_017B9_RB9_01_14134.mzXML	TRUE	2008-05-24	marine metagenome	GAZ:Panama	A1822_017B9_RB9_01_14134.mzXML	0	PAP24MAY08.6 spirocoleus sp.	FALSE	0	ENVO:marine biome	ENVO:sea water	ENVO:organic material	spirocoleus sp.	E	TRUE	TRUE	spirocoleus sp.	cyanobacteria	A1822.017B9.RB9.01.14134	1117	9.62753	-79.5687	UCSD	UCSDMI	TRUE	FALSE	completed	UCSD	cyanobacteria	408172	Cyanobacteria	PAP
10125.A1822.017C1.RC1.01.14137.mzXML	0	A1822_017C1_RC1_01_14137.mzXML	TRUE	2008-05-24	marine metagenome	GAZ:Panama	A1822_017C1_RC1_01_14137.mzXML	0	PAP24MAY08.6 spirocoleus sp.	FALSE	0	ENVO:marine biome	ENVO:sea water	ENVO:organic material	spirocoleus sp.	H	TRUE	TRUE	spirocoleus sp.	cyanobacteria	A1822.017C1.RC1.01.14137	1117	9.62753	-79.5687	UCSD	UCSDMI	TRUE	FALSE	completed	UCSD	cyanobacteria	408172	Cyanobacteria	PAP
10125.A1822.017C2.RC2.01.14138.mzXML	0	A1822_017C2_RC2_01_14138.mzXML	TRUE	2008-05-24	marine metagenome	GAZ:Panama	A1822_017C2_RC2_01_14138.mzXML	0	PAP24MAY08.6 spirocoleus sp.	FALSE	0	ENVO:marine biome	ENVO:sea water	ENVO:organic material	spirocoleus sp.	I	TRUE	TRUE	spirocoleus sp.	cyanobacteria	A1822.017C2.RC2.01.14138	1117	9.62753	-79.5687	UCSD	UCSDMI	TRUE	FALSE	completed	UCSD	cyanobacteria	408172	Cyanobacteria	PAP
10125.A1823.017C10.RC10.01.14147.mzXML	0	A1823_017C10_RC10_01_14147.mzXML	TRUE	2008-05-24	marine metagenome	GAZ:Panama	A1823_017C10_RC10_01_14147.mzXML	0	PAP24MAY08.3A red lyngbya	FALSE	0	ENVO:marine biome	ENVO:sea water	ENVO:organic material	red lyngbya	H	TRUE	TRUE	red lyngbya	cyanobacteria	A1823.017C10.RC10.01.14147	1117	9.62753	-79.5687	UCSD	UCSDMI	TRUE	FALSE	completed	UCSD	cyanobacteria	408172	Cyanobacteria	PAP
10125.A1823.017C11.RC11.01.14148.mzXML	0	A1823_017C11_RC11_01_14148.mzXML	TRUE	2008-05-24	marine metagenome	GAZ:Panama	A1823_017C11_RC11_01_14148.mzXML	0	PAP24MAY08.3A red lyngbya	FALSE	0	ENVO:marine biome	ENVO:sea water	ENVO:organic material	red lyngbya	I	TRUE	TRUE	red lyngbya	cyanobacteria	A1823.017C11.RC11.01.14148	1117	9.62753	-79.5687	UCSD	UCSDMI	TRUE	FALSE	completed	UCSD	cyanobacteria	408172	Cyanobacteria	PAP
10125.A1823.017C3.RC3.01.14140.mzXML	0	A1823_017C3_RC3_01_14140.mzXML	TRUE	2008-05-24	marine metagenome	GAZ:Panama	A1823_017C3_RC3_01_14140.mzXML	0	PAP24MAY08.3A red lyngbya	FALSE	0	ENVO:marine biome	ENVO:sea water	ENVO:organic material	red lyngbya	A	TRUE	TRUE	red lyngbya	cyanobacteria	A1823.017C3.RC3.01.14140	1117	9.62753	-79.5687	UCSD	UCSDMI	TRUE	FALSE	completed	UCSD	cyanobacteria	408172	Cyanobacteria	PAP
10125.A1823.017C4.RC4.01.14141.mzXML	0	A1823_017C4_RC4_01_14141.mzXML	TRUE	2008-05-24	marine metagenome	GAZ:Panama	A1823_017C4_RC4_01_14141.mzXML	0	PAP24MAY08.3A red lyngbya	FALSE	0	ENVO:marine biome	ENVO:sea water	ENVO:organic material	red lyngbya	B	TRUE	TRUE	red lyngbya	cyanobacteria	A1823.017C4.RC4.01.14141	1117	9.62753	-79.5687	UCSD	UCSDMI	TRUE	FALSE	completed	UCSD	cyanobacteria	408172	Cyanobacteria	PAP
10125.A1823.017C5.RC5.01.14142.mzXML	0	A1823_017C5_RC5_01_14142.mzXML	TRUE	2008-05-24	marine metagenome	GAZ:Panama	A1823_017C5_RC5_01_14142.mzXML	0	PAP24MAY08.3A red lyngbya	FALSE	0	ENVO:marine biome	ENVO:sea water	ENVO:organic material	red lyngbya	C	TRUE	TRUE	red lyngbya	cyanobacteria	A1823.017C5.RC5.01.14142	1117	9.62753	-79.5687	UCSD	UCSDMI	TRUE	FALSE	completed	UCSD	cyanobacteria	408172	Cyanobacteria	PAP
10125.A1823.017C6.RC6.01.14143.mzXML	0	A1823_017C6_RC6_01_14143.mzXML	TRUE	2008-05-24	marine metagenome	GAZ:Panama	A1823_017C6_RC6_01_14143.mzXML	0	PAP24MAY08.3A red lyngbya	FALSE	0	ENVO:marine biome	ENVO:sea water	ENVO:organic material	red lyngbya	D	TRUE	TRUE	red lyngbya	cyanobacteria	A1823.017C6.RC6.01.14143	1117	9.62753	-79.5687	UCSD	UCSDMI	TRUE	FALSE	completed	UCSD	cyanobacteria	408172	Cyanobacteria	PAP
10125.A1823.017C7.RC7.01.14144.mzXML	0	A1823_017C7_RC7_01_14144.mzXML	TRUE	2008-05-24	marine metagenome	GAZ:Panama	A1823_017C7_RC7_01_14144.mzXML	0	PAP24MAY08.3A red lyngbya	FALSE	0	ENVO:marine biome	ENVO:sea water	ENVO:organic material	red lyngbya	E	TRUE	TRUE	red lyngbya	cyanobacteria	A1823.017C7.RC7.01.14144	1117	9.62753	-79.5687	UCSD	UCSDMI	TRUE	FALSE	completed	UCSD	cyanobacteria	408172	Cyanobacteria	PAP
10125.A1823.017C8.RC8.01.14145.mzXML	0	A1823_017C8_RC8_01_14145.mzXML	TRUE	2008-05-24	marine metagenome	GAZ:Panama	A1823_017C8_RC8_01_14145.mzXML	0	PAP24MAY08.3A red lyngbya	FALSE	0	ENVO:marine biome	ENVO:sea water	ENVO:organic material	red lyngbya	F	TRUE	TRUE	red lyngbya	cyanobacteria	A1823.017C8.RC8.01.14145	1117	9.62753	-79.5687	UCSD	UCSDMI	TRUE	FALSE	completed	UCSD	cyanobacteria	408172	Cyanobacteria	PAP
10125.A1823.017C9.RC9.01.14146.mzXML	0	A1823_017C9_RC9_01_14146.mzXML	TRUE	2008-05-24	marine metagenome	GAZ:Panama	A1823_017C9_RC9_01_14146.mzXML	0	PAP24MAY08.3A red lyngbya	FALSE	0	ENVO:marine biome	ENVO:sea water	ENVO:organic material	red lyngbya	G	TRUE	TRUE	red lyngbya	cyanobacteria	A1823.017C9.RC9.01.14146	1117	9.62753	-79.5687	UCSD	UCSDMI	TRUE	FALSE	completed	UCSD	cyanobacteria	408172	Cyanobacteria	PAP
10125.A1824.017D1.3.RD1.01.14185.mzXML	0	A1824_017D1_3_RD1_01_14185.mzXML	TRUE	2008-05-25	marine metagenome	GAZ:Panama	A1824_017D1_3_RD1_01_14185.mzXML	0	PAP25MAY08.5 unknown	FALSE	0	ENVO:marine biome	ENVO:sea water	ENVO:organic material	other	Crude	TRUE	TRUE	other	other	A1824.017D1.3.RD1.01.14185	408172	9.617	-79.6005	UCSD	UCSDMI	TRUE	FALSE	completed	UCSD	cyanobacteria	408172	Cyanobacteria	PAP
10125.A1824.017D10.RD10.01.14159.mzXML	0	A1824_017D10_RD10_01_14159.mzXML	TRUE	2008-05-25	marine metagenome	GAZ:Panama	A1824_017D10_RD10_01_14159.mzXML	0	PAP25MAY08.5 unknown	FALSE	0	ENVO:marine biome	ENVO:sea water	ENVO:organic material	other	I	TRUE	TRUE	other	other	A1824.017D10.RD10.01.14159	408172	9.617	-79.6005	UCSD	UCSDMI	TRUE	FALSE	completed	UCSD	cyanobacteria	408172	Cyanobacteria	PAP
10125.A1824.017D2.RD2.01.14151.mzXML	0	A1824_017D2_RD2_01_14151.mzXML	TRUE	2008-05-25	marine metagenome	GAZ:Panama	A1824_017D2_RD2_01_14151.mzXML	0	PAP25MAY08.5 unknown	FALSE	0	ENVO:marine biome	ENVO:sea water	ENVO:organic material	other	A	TRUE	TRUE	other	other	A1824.017D2.RD2.01.14151	408172	9.617	-79.6005	UCSD	UCSDMI	TRUE	FALSE	completed	UCSD	cyanobacteria	408172	Cyanobacteria	PAP
10125.A1824.017D3.RD3.01.14152.mzXML	0	A1824_017D3_RD3_01_14152.mzXML	TRUE	2008-05-25	marine metagenome	GAZ:Panama	A1824_017D3_RD3_01_14152.mzXML	0	PAP25MAY08.5 unknown	FALSE	0	ENVO:marine biome	ENVO:sea water	ENVO:organic material	other	B	TRUE	TRUE	other	other	A1824.017D3.RD3.01.14152	408172	9.617	-79.6005	UCSD	UCSDMI	TRUE	FALSE	completed	UCSD	cyanobacteria	408172	Cyanobacteria	PAP
10125.A1824.017D4.RD4.01.14153.mzXML	0	A1824_017D4_RD4_01_14153.mzXML	TRUE	2008-05-25	marine metagenome	GAZ:Panama	A1824_017D4_RD4_01_14153.mzXML	0	PAP25MAY08.5 unknown	FALSE	0	ENVO:marine biome	ENVO:sea water	ENVO:organic material	other	C	TRUE	TRUE	other	other	A1824.017D4.RD4.01.14153	408172	9.617	-79.6005	UCSD	UCSDMI	TRUE	FALSE	completed	UCSD	cyanobacteria	408172	Cyanobacteria	PAP
10125.A1824.017D5.RD5.01.14154.mzXML	0	A1824_017D5_RD5_01_14154.mzXML	TRUE	2008-05-25	marine metagenome	GAZ:Panama	A1824_017D5_RD5_01_14154.mzXML	0	PAP25MAY08.5 unknown	FALSE	0	ENVO:marine biome	ENVO:sea water	ENVO:organic material	other	D	TRUE	TRUE	other	other	A1824.017D5.RD5.01.14154	408172	9.617	-79.6005	UCSD	UCSDMI	TRUE	FALSE	completed	UCSD	cyanobacteria	408172	Cyanobacteria	PAP
10125.A1824.017D6.RD6.01.14155.mzXML	0	A1824_017D6_RD6_01_14155.mzXML	TRUE	2008-05-25	marine metagenome	GAZ:Panama	A1824_017D6_RD6_01_14155.mzXML	0	PAP25MAY08.5 unknown	FALSE	0	ENVO:marine biome	ENVO:sea water	ENVO:organic material	other	E	TRUE	TRUE	other	other	A1824.017D6.RD6.01.14155	408172	9.617	-79.6005	UCSD	UCSDMI	TRUE	FALSE	completed	UCSD	cyanobacteria	408172	Cyanobacteria	PAP
10125.A1824.017D7.RD7.01.14156.mzXML	0	A1824_017D7_RD7_01_14156.mzXML	TRUE	2008-05-25	marine metagenome	GAZ:Panama	A1824_017D7_RD7_01_14156.mzXML	0	PAP25MAY08.5 unknown	FALSE	0	ENVO:marine biome	ENVO:sea water	ENVO:organic material	other	F	TRUE	TRUE	other	other	A1824.017D7.RD7.01.14156	408172	9.617	-79.6005	UCSD	UCSDMI	TRUE	FALSE	completed	UCSD	cyanobacteria	408172	Cyanobacteria	PAP
10125.A1824.017D8.RD8.01.14157.mzXML	0	A1824_017D8_RD8_01_14157.mzXML	TRUE	2008-05-25	marine metagenome	GAZ:Panama	A1824_017D8_RD8_01_14157.mzXML	0	PAP25MAY08.5 unknown	FALSE	0	ENVO:marine biome	ENVO:sea water	ENVO:organic material	other	G	TRUE	TRUE	other	other	A1824.017D8.RD8.01.14157	408172	9.617	-79.6005	UCSD	UCSDMI	TRUE	FALSE	completed	UCSD	cyanobacteria	408172	Cyanobacteria	PAP
10125.A1824.017D9.RD9.01.14158.mzXML	0	A1824_017D9_RD9_01_14158.mzXML	TRUE	2008-05-25	marine metagenome	GAZ:Panama	A1824_017D9_RD9_01_14158.mzXML	0	PAP25MAY08.5 unknown	FALSE	0	ENVO:marine biome	ENVO:sea water	ENVO:organic material	other	H	TRUE	TRUE	other	other	A1824.017D9.RD9.01.14158	408172	9.617	-79.6005	UCSD	UCSDMI	TRUE	FALSE	completed	UCSD	cyanobacteria	408172	Cyanobacteria	PAP
10125.A1825.017D11.RD11.01.14161.mzXML	0	A1825_017D11_RD11_01_14161.mzXML	TRUE	2008-05-25	marine metagenome	GAZ:Panama	A1825_017D11_RD11_01_14161.mzXML	0	PAP25MAY08.9 unknown	FALSE	0	ENVO:marine biome	ENVO:sea water	ENVO:organic material	other	Crude	TRUE	TRUE	other	other	A1825.017D11.RD11.01.14161	408172	9.617	-79.6005	UCSD	UCSDMI	TRUE	FALSE	completed	UCSD	cyanobacteria	408172	Cyanobacteria	PAP
10125.A1825.017E1.3.RE1.01.14186.mzXML	0	A1825_017E1_3_RE1_01_14186.mzXML	TRUE	2008-05-25	marine metagenome	GAZ:Panama	A1825_017E1_3_RE1_01_14186.mzXML	0	PAP25MAY08.9 unknown	FALSE	0	ENVO:marine biome	ENVO:sea water	ENVO:organic material	other	A	TRUE	TRUE	other	other	A1825.017E1.3.RE1.01.14186	408172	9.617	-79.6005	UCSD	UCSDMI	TRUE	FALSE	completed	UCSD	cyanobacteria	408172	Cyanobacteria	PAP
10125.A1825.017E2.RE2.01.14163.mzXML	0	A1825_017E2_RE2_01_14163.mzXML	TRUE	2008-05-25	marine metagenome	GAZ:Panama	A1825_017E2_RE2_01_14163.mzXML	0	PAP25MAY08.9 unknown	FALSE	0	ENVO:marine biome	ENVO:sea water	ENVO:organic material	other	B	TRUE	TRUE	other	other	A1825.017E2.RE2.01.14163	408172	9.617	-79.6005	UCSD	UCSDMI	TRUE	FALSE	completed	UCSD	cyanobacteria	408172	Cyanobacteria	PAP
10125.A1825.017E3.RE3.01.14164.mzXML	0	A1825_017E3_RE3_01_14164.mzXML	TRUE	2008-05-25	marine metagenome	GAZ:Panama	A1825_017E3_RE3_01_14164.mzXML	0	PAP25MAY08.9 unknown	FALSE	0	ENVO:marine biome	ENVO:sea water	ENVO:organic material	other	C	TRUE	TRUE	other	other	A1825.017E3.RE3.01.14164	408172	9.617	-79.6005	UCSD	UCSDMI	TRUE	FALSE	completed	UCSD	cyanobacteria	408172	Cyanobacteria	PAP
10125.A1825.017E4.RE4.01.14165.mzXML	0	A1825_017E4_RE4_01_14165.mzXML	TRUE	2008-05-25	marine metagenome	GAZ:Panama	A1825_017E4_RE4_01_14165.mzXML	0	PAP25MAY08.9 unknown	FALSE	0	ENVO:marine biome	ENVO:sea water	ENVO:organic material	other	D	TRUE	TRUE	other	other	A1825.017E4.RE4.01.14165	408172	9.617	-79.6005	UCSD	UCSDMI	TRUE	FALSE	completed	UCSD	cyanobacteria	408172	Cyanobacteria	PAP
10125.A1825.017E5.RE5.01.14166.mzXML	0	A1825_017E5_RE5_01_14166.mzXML	TRUE	2008-05-25	marine metagenome	GAZ:Panama	A1825_017E5_RE5_01_14166.mzXML	0	PAP25MAY08.9 unknown	FALSE	0	ENVO:marine biome	ENVO:sea water	ENVO:organic material	other	E	TRUE	TRUE	other	other	A1825.017E5.RE5.01.14166	408172	9.617	-79.6005	UCSD	UCSDMI	TRUE	FALSE	completed	UCSD	cyanobacteria	408172	Cyanobacteria	PAP
10125.A1825.017E6.RE6.01.14167.mzXML	0	A1825_017E6_RE6_01_14167.mzXML	TRUE	2008-05-25	marine metagenome	GAZ:Panama	A1825_017E6_RE6_01_14167.mzXML	0	PAP25MAY08.9 unknown	FALSE	0	ENVO:marine biome	ENVO:sea water	ENVO:organic material	other	F	TRUE	TRUE	other	other	A1825.017E6.RE6.01.14167	408172	9.617	-79.6005	UCSD	UCSDMI	TRUE	FALSE	completed	UCSD	cyanobacteria	408172	Cyanobacteria	PAP
10125.A1825.017E7.RE7.01.14168.mzXML	0	A1825_017E7_RE7_01_14168.mzXML	TRUE	2008-05-25	marine metagenome	GAZ:Panama	A1825_017E7_RE7_01_14168.mzXML	0	PAP25MAY08.9 unknown	FALSE	0	ENVO:marine biome	ENVO:sea water	ENVO:organic material	other	G	TRUE	TRUE	other	other	A1825.017E7.RE7.01.14168	408172	9.617	-79.6005	UCSD	UCSDMI	TRUE	FALSE	completed	UCSD	cyanobacteria	408172	Cyanobacteria	PAP
10125.A1825.017E8.RE8.01.14169.mzXML	0	A1825_017E8_RE8_01_14169.mzXML	TRUE	2008-05-25	marine metagenome	GAZ:Panama	A1825_017E8_RE8_01_14169.mzXML	0	PAP25MAY08.9 unknown	FALSE	0	ENVO:marine biome	ENVO:sea water	ENVO:organic material	other	H	TRUE	TRUE	other	other	A1825.017E8.RE8.01.14169	408172	9.617	-79.6005	UCSD	UCSDMI	TRUE	FALSE	completed	UCSD	cyanobacteria	408172	Cyanobacteria	PAP
10125.A1825.017E9.RE9.01.14170.mzXML	0	A1825_017E9_RE9_01_14170.mzXML	TRUE	2008-05-25	marine metagenome	GAZ:Panama	A1825_017E9_RE9_01_14170.mzXML	0	PAP25MAY08.9 unknown	FALSE	0	ENVO:marine biome	ENVO:sea water	ENVO:organic material	other	I	TRUE	TRUE	other	other	A1825.017E9.RE9.01.14170	408172	9.617	-79.6005	UCSD	UCSDMI	TRUE	FALSE	completed	UCSD	cyanobacteria	408172	Cyanobacteria	PAP
10125.A1827.017E10.RE10.01.14172.mzXML	0	A1827_017E10_RE10_01_14172.mzXML	TRUE	2008-06-14	marine metagenome	GAZ:Panama	A1827_017E10_RE10_01_14172.mzXML	0	PAP14JUN08.5 unknown	FALSE	0	ENVO:marine biome	ENVO:sea water	ENVO:organic material	other	Crude	TRUE	TRUE	other	other	A1827.017E10.RE10.01.14172	408172	9.56248	-79.68	UCSD	UCSDMI	TRUE	FALSE	completed	UCSD	cyanobacteria	408172	Cyanobacteria	PAP
10125.A1827.017E11.RE11.01.14173.mzXML	0	A1827_017E11_RE11_01_14173.mzXML	TRUE	2008-06-14	marine metagenome	GAZ:Panama	A1827_017E11_RE11_01_14173.mzXML	0	PAP14JUN08.5 unknown	FALSE	0	ENVO:marine biome	ENVO:sea water	ENVO:organic material	other	A	TRUE	TRUE	other	other	A1827.017E11.RE11.01.14173	408172	9.56248	-79.68	UCSD	UCSDMI	TRUE	FALSE	completed	UCSD	cyanobacteria	408172	Cyanobacteria	PAP
10125.A1827.017F1.4.RF1.01.14184.mzXML	0	A1827_017F1_4_RF1_01_14184.mzXML	TRUE	2008-06-14	marine metagenome	GAZ:Panama	A1827_017F1_4_RF1_01_14184.mzXML	0	PAP14JUN08.5 unknown	FALSE	0	ENVO:marine biome	ENVO:sea water	ENVO:organic material	other	B	TRUE	TRUE	other	other	A1827.017F1.4.RF1.01.14184	408172	9.56248	-79.68	UCSD	UCSDMI	TRUE	FALSE	completed	UCSD	cyanobacteria	408172	Cyanobacteria	PAP
10125.A1827.017F2.RF2.01.14175.mzXML	0	A1827_017F2_RF2_01_14175.mzXML	TRUE	2008-06-14	marine metagenome	GAZ:Panama	A1827_017F2_RF2_01_14175.mzXML	0	PAP14JUN08.5 unknown	FALSE	0	ENVO:marine biome	ENVO:sea water	ENVO:organic material	other	C	TRUE	TRUE	other	other	A1827.017F2.RF2.01.14175	408172	9.56248	-79.68	UCSD	UCSDMI	TRUE	FALSE	completed	UCSD	cyanobacteria	408172	Cyanobacteria	PAP
10125.A1827.017F3.RF3.01.14180.mzXML	0	A1827_017F3_RF3_01_14180.mzXML	TRUE	2008-06-14	marine metagenome	GAZ:Panama	A1827_017F3_RF3_01_14180.mzXML	0	PAP14JUN08.5 unknown	FALSE	0	ENVO:marine biome	ENVO:sea water	ENVO:organic material	other	D	TRUE	TRUE	other	other	A1827.017F3.RF3.01.14180	408172	9.56248	-79.68	UCSD	UCSDMI	TRUE	FALSE	completed	UCSD	cyanobacteria	408172	Cyanobacteria	PAP
10125.A1827.017F4.RF4.01.14181.mzXML	0	A1827_017F4_RF4_01_14181.mzXML	TRUE	2008-06-14	marine metagenome	GAZ:Panama	A1827_017F4_RF4_01_14181.mzXML	0	PAP14JUN08.5 unknown	FALSE	0	ENVO:marine biome	ENVO:sea water	ENVO:organic material	other	E	TRUE	TRUE	other	other	A1827.017F4.RF4.01.14181	408172	9.56248	-79.68	UCSD	UCSDMI	TRUE	FALSE	completed	UCSD	cyanobacteria	408172	Cyanobacteria	PAP
10125.A1827.017F5.RF5.01.14182.mzXML	0	A1827_017F5_RF5_01_14182.mzXML	TRUE	2008-06-14	marine metagenome	GAZ:Panama	A1827_017F5_RF5_01_14182.mzXML	0	PAP14JUN08.5 unknown	FALSE	0	ENVO:marine biome	ENVO:sea water	ENVO:organic material	other	F	TRUE	TRUE	other	other	A1827.017F5.RF5.01.14182	408172	9.56248	-79.68	UCSD	UCSDMI	TRUE	FALSE	completed	UCSD	cyanobacteria	408172	Cyanobacteria	PAP
10125.A1827.017F6.RF6.01.14183.mzXML	0	A1827_017F6_RF6_01_14183.mzXML	TRUE	2008-06-14	marine metagenome	GAZ:Panama	A1827_017F6_RF6_01_14183.mzXML	0	PAP14JUN08.5 unknown	FALSE	0	ENVO:marine biome	ENVO:sea water	ENVO:organic material	other	G	TRUE	TRUE	other	other	A1827.017F6.RF6.01.14183	408172	9.56248	-79.68	UCSD	UCSDMI	TRUE	FALSE	completed	UCSD	cyanobacteria	408172	Cyanobacteria	PAP
10125.A1827.017F7.RF7.01.14187.mzXML	0	A1827_017F7_RF7_01_14187.mzXML	TRUE	2008-06-14	marine metagenome	GAZ:Panama	A1827_017F7_RF7_01_14187.mzXML	0	PAP14JUN08.5 unknown	FALSE	0	ENVO:marine biome	ENVO:sea water	ENVO:organic material	other	H	TRUE	TRUE	other	other	A1827.017F7.RF7.01.14187	408172	9.56248	-79.68	UCSD	UCSDMI	TRUE	FALSE	completed	UCSD	cyanobacteria	408172	Cyanobacteria	PAP
10125.A1827.017F8.RF8.01.14188.mzXML	0	A1827_017F8_RF8_01_14188.mzXML	TRUE	2008-06-14	marine metagenome	GAZ:Panama	A1827_017F8_RF8_01_14188.mzXML	0	PAP14JUN08.5 unknown	FALSE	0	ENVO:marine biome	ENVO:sea water	ENVO:organic material	other	I	TRUE	TRUE	other	other	A1827.017F8.RF8.01.14188	408172	9.56248	-79.68	UCSD	UCSDMI	TRUE	FALSE	completed	UCSD	cyanobacteria	408172	Cyanobacteria	PAP
10125.A1828.017F10.RF10.01.14191.mzXML	0	A1828_017F10_RF10_01_14191.mzXML	TRUE	2008-06-14	marine metagenome	GAZ:Panama	A1828_017F10_RF10_01_14191.mzXML	0	PAP14JUN08.4 red lyngbya	FALSE	0	ENVO:marine biome	ENVO:sea water	ENVO:organic material	red lyngbya	A	TRUE	TRUE	red lyngbya	cyanobacteria	A1828.017F10.RF10.01.14191	1117	9.56248	-79.68	UCSD	UCSDMI	TRUE	FALSE	completed	UCSD	cyanobacteria	408172	Cyanobacteria	PAP
[truncated: 1,566 more rows]
