# Supplementary figures and images for: Digitizing mass spectrometry data to explore the chemical diversity and distribution of marine cyanobacteria and algae
Source: eLife journal article supplement (doi:10.7554/elife.24214), 2017-05-11

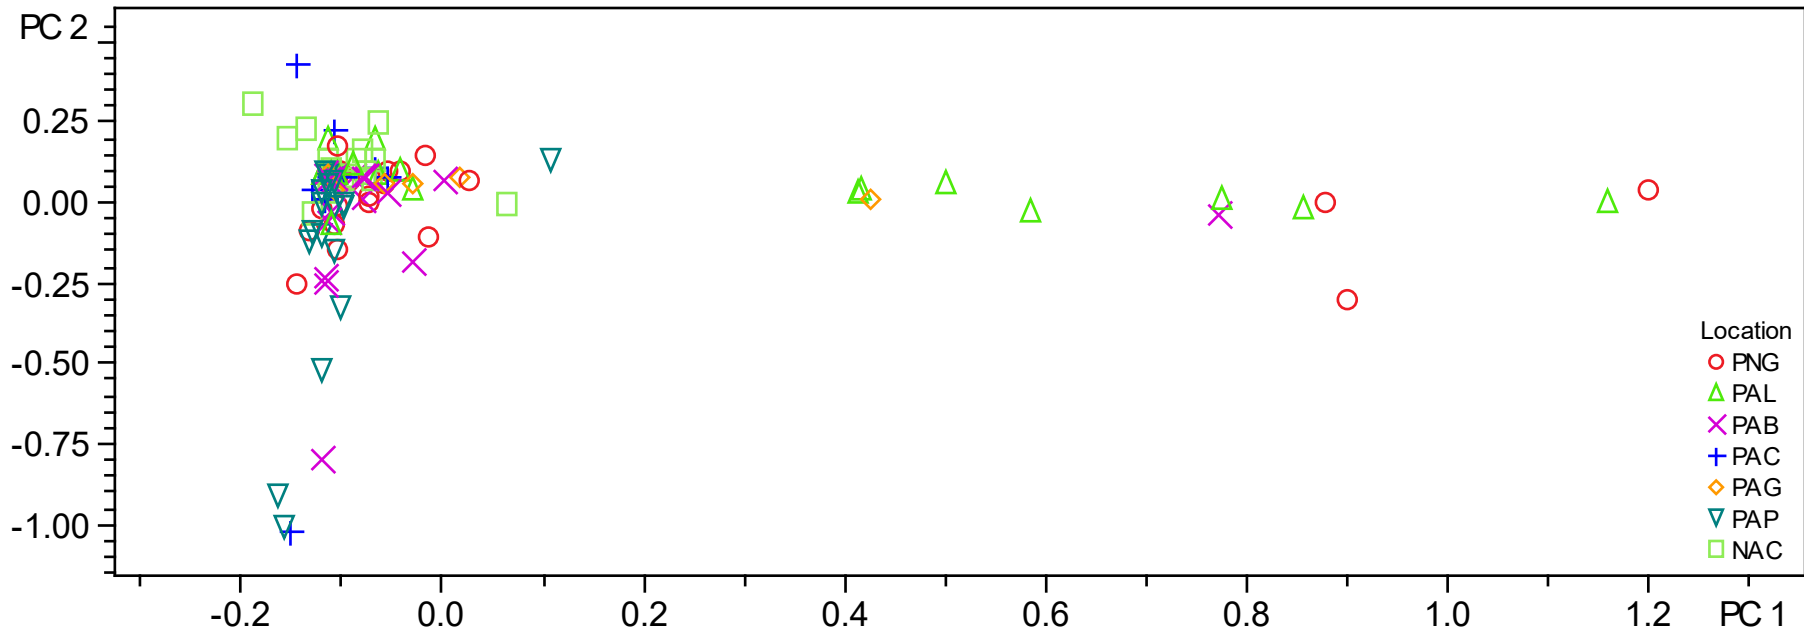

Supplement: supp [file elife_poa_e24214_Figure_2_Figure_Supplement_1.pdf › elife_poa_e24214_Figure_2_Figure_Supplement_1.pdf]

A

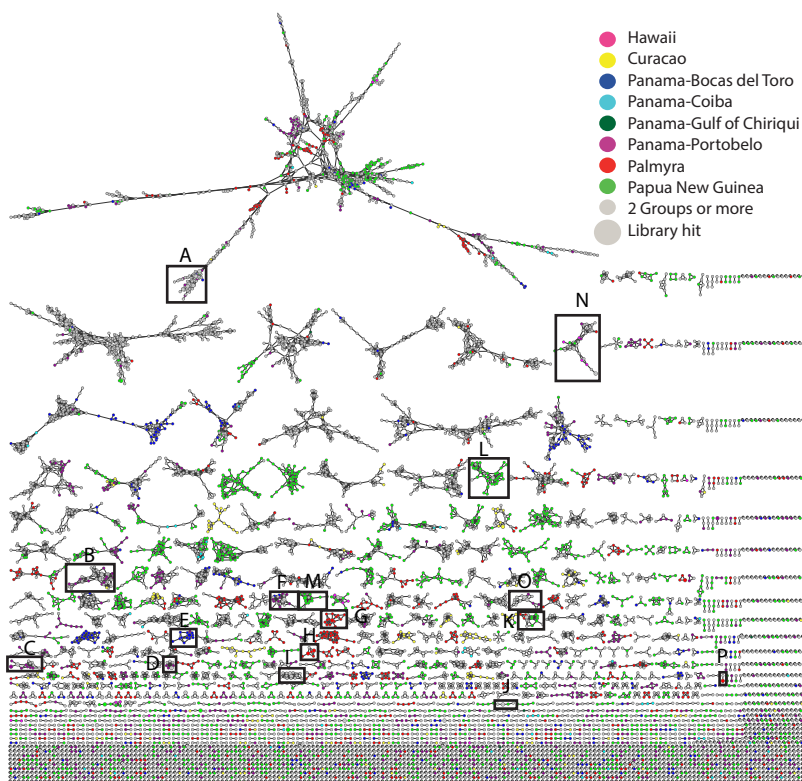

B

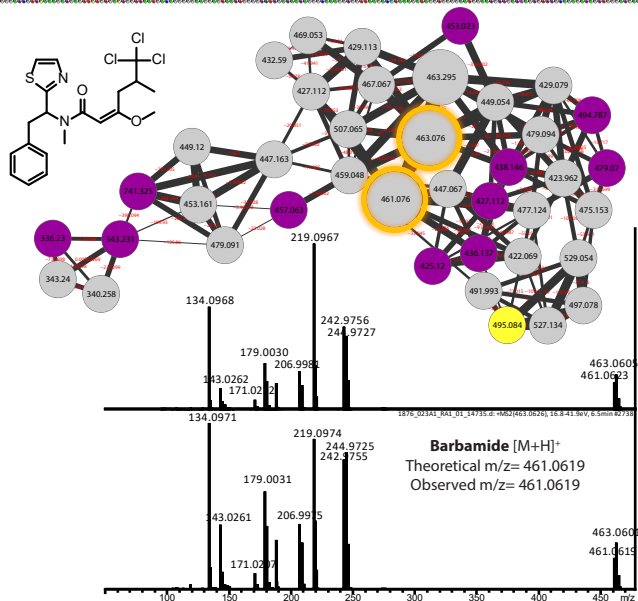

C

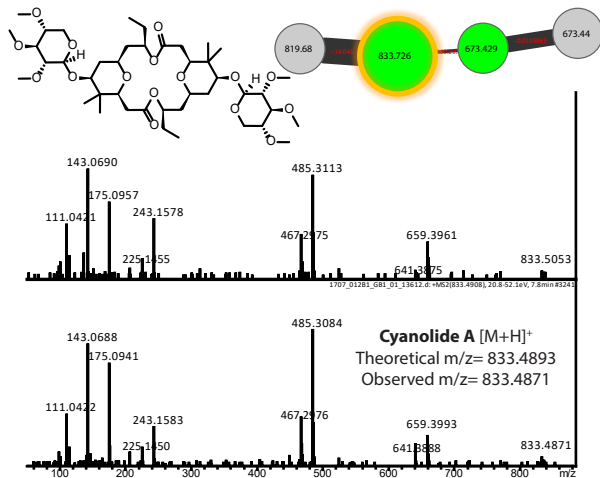

Supplement: supp [file elife_poa_e24214_Figure_3_Figure_Supplement_1.pdf › elife_poa_e24214_Figure_3_Figure_Supplement_1.pdf]

A

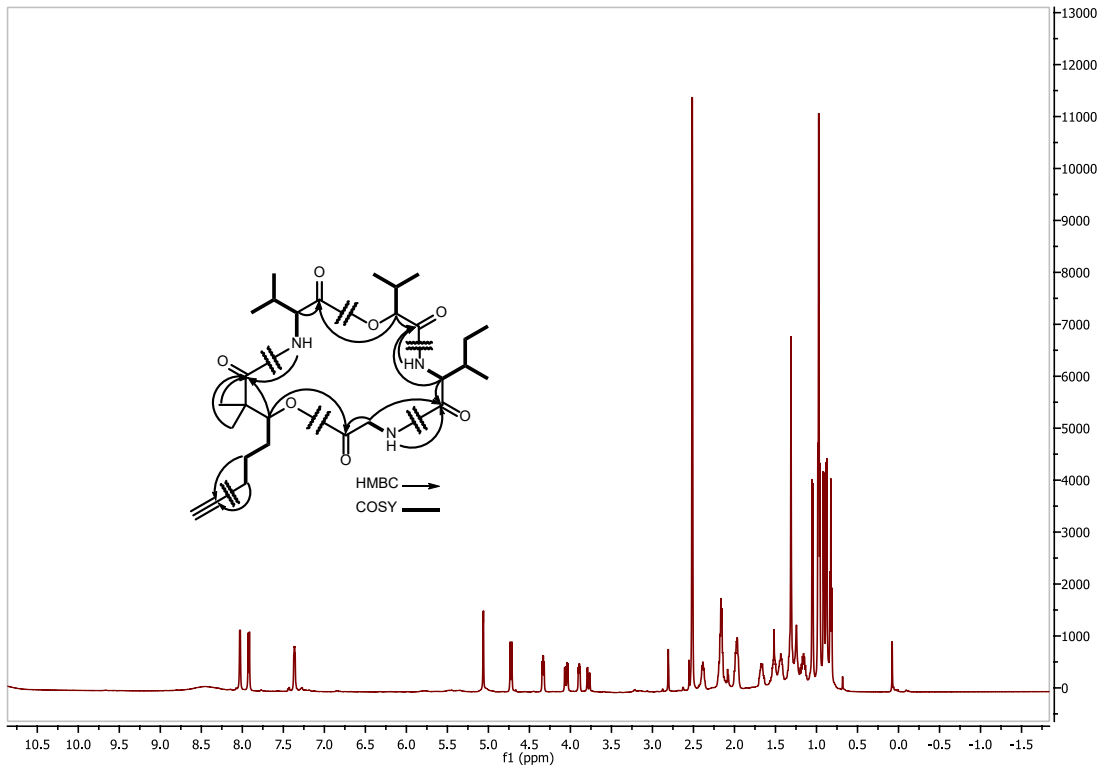

B

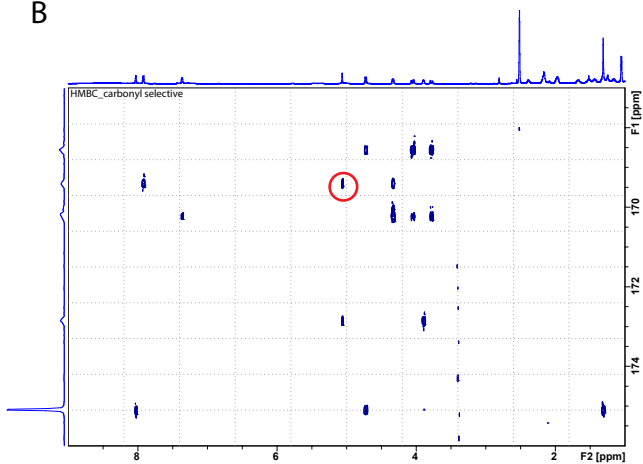

C

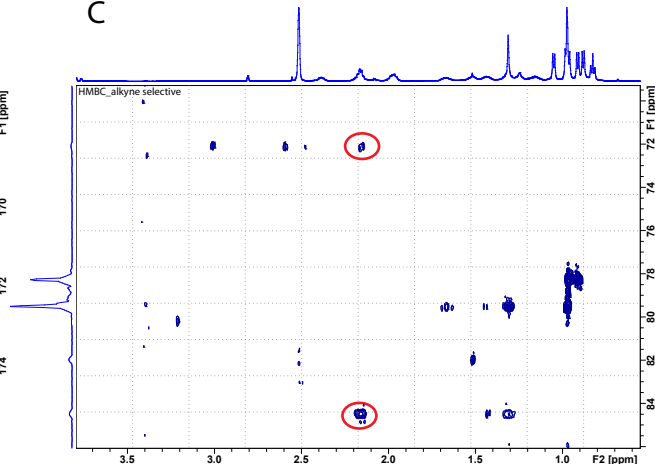

Supplement: supp [file elife_poa_e24214_Figure_5_Figure_Supplement_1.pdf › elife_poa_e24214_Figure_5_Figure_Supplement_1.pdf]

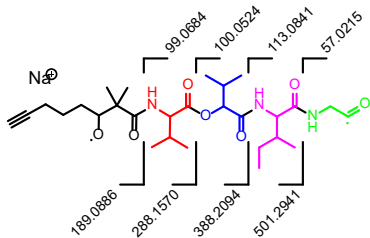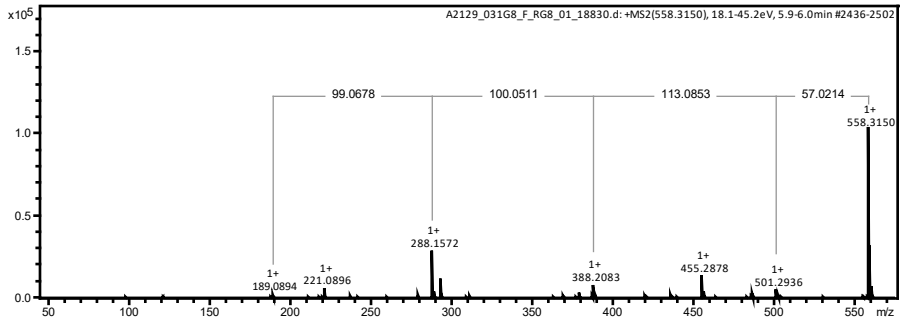

Supplement: supp [file elife_poa_e24214_Figure_5_Figure_Supplement_2.pdf › elife_poa_e24214_Figure_5_Figure_Supplement_2.pdf]

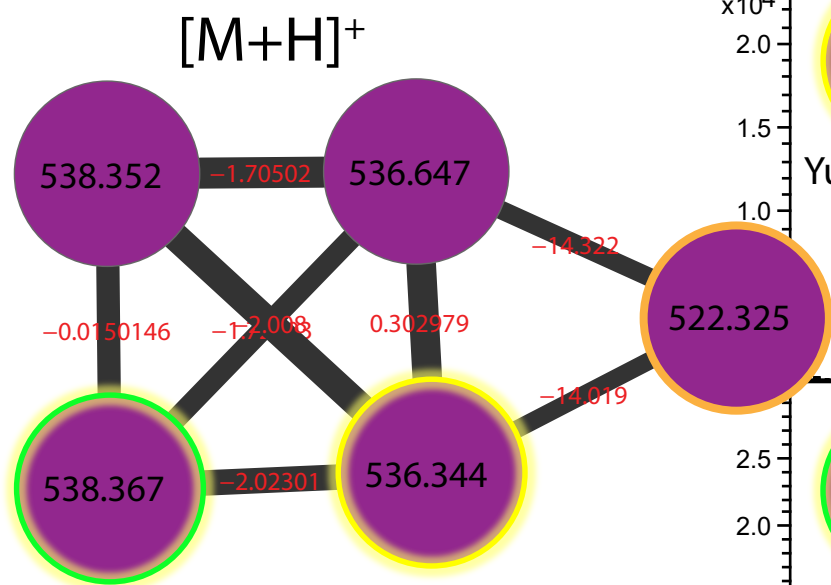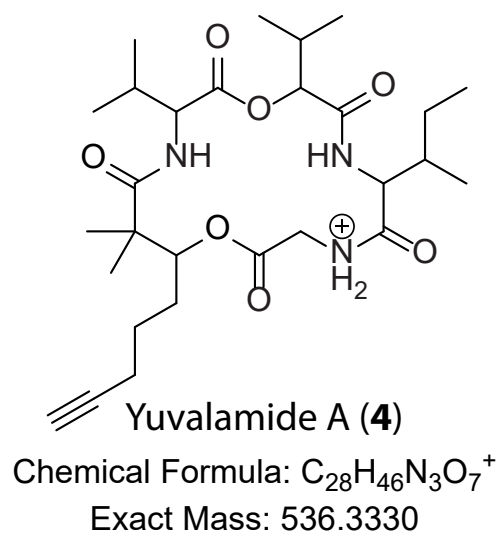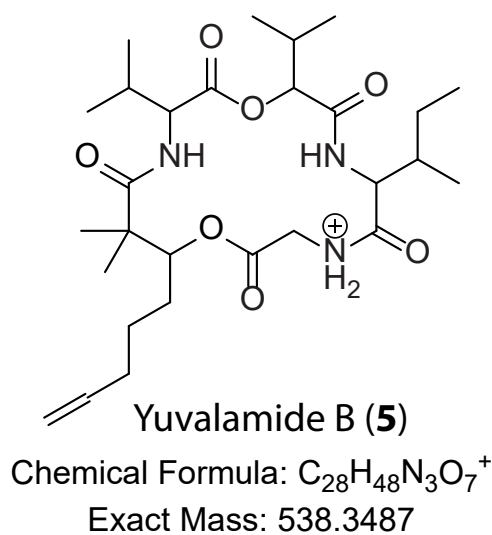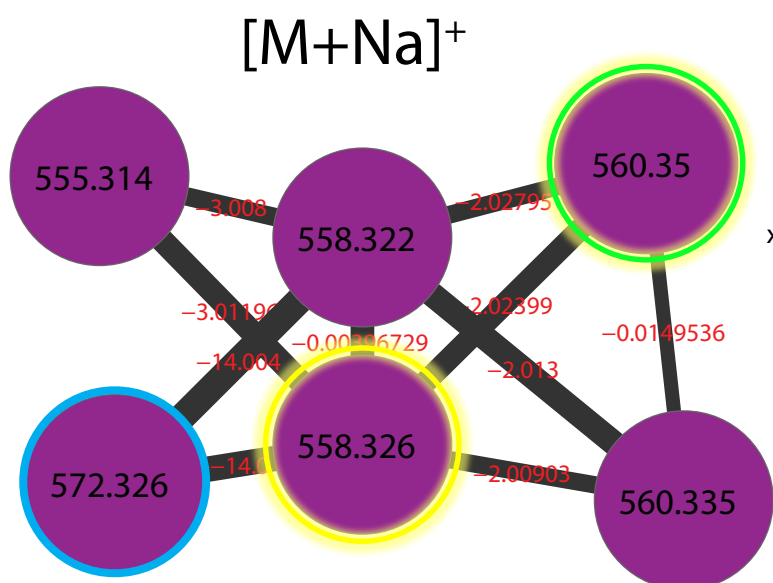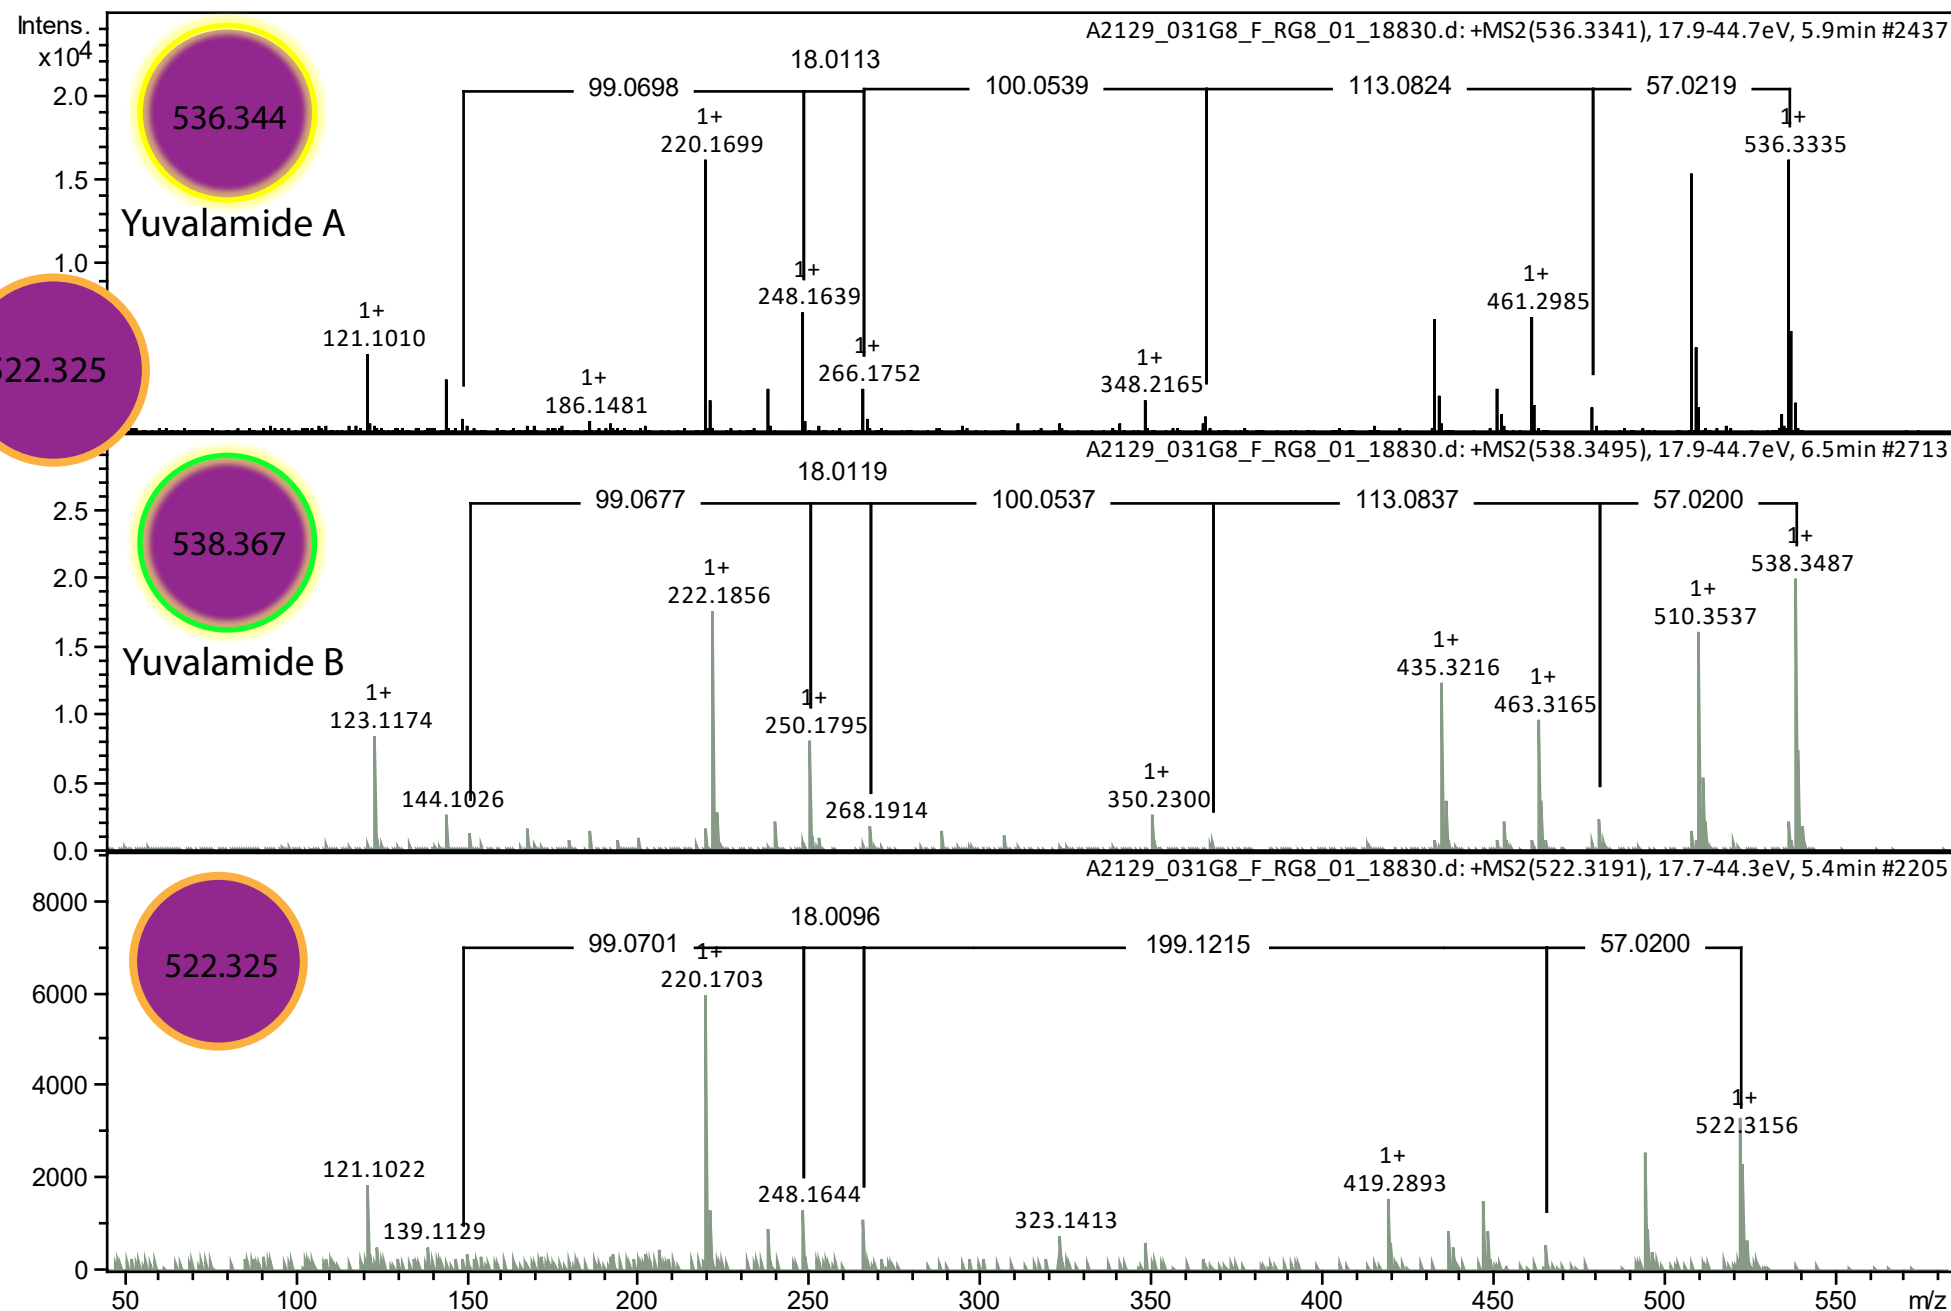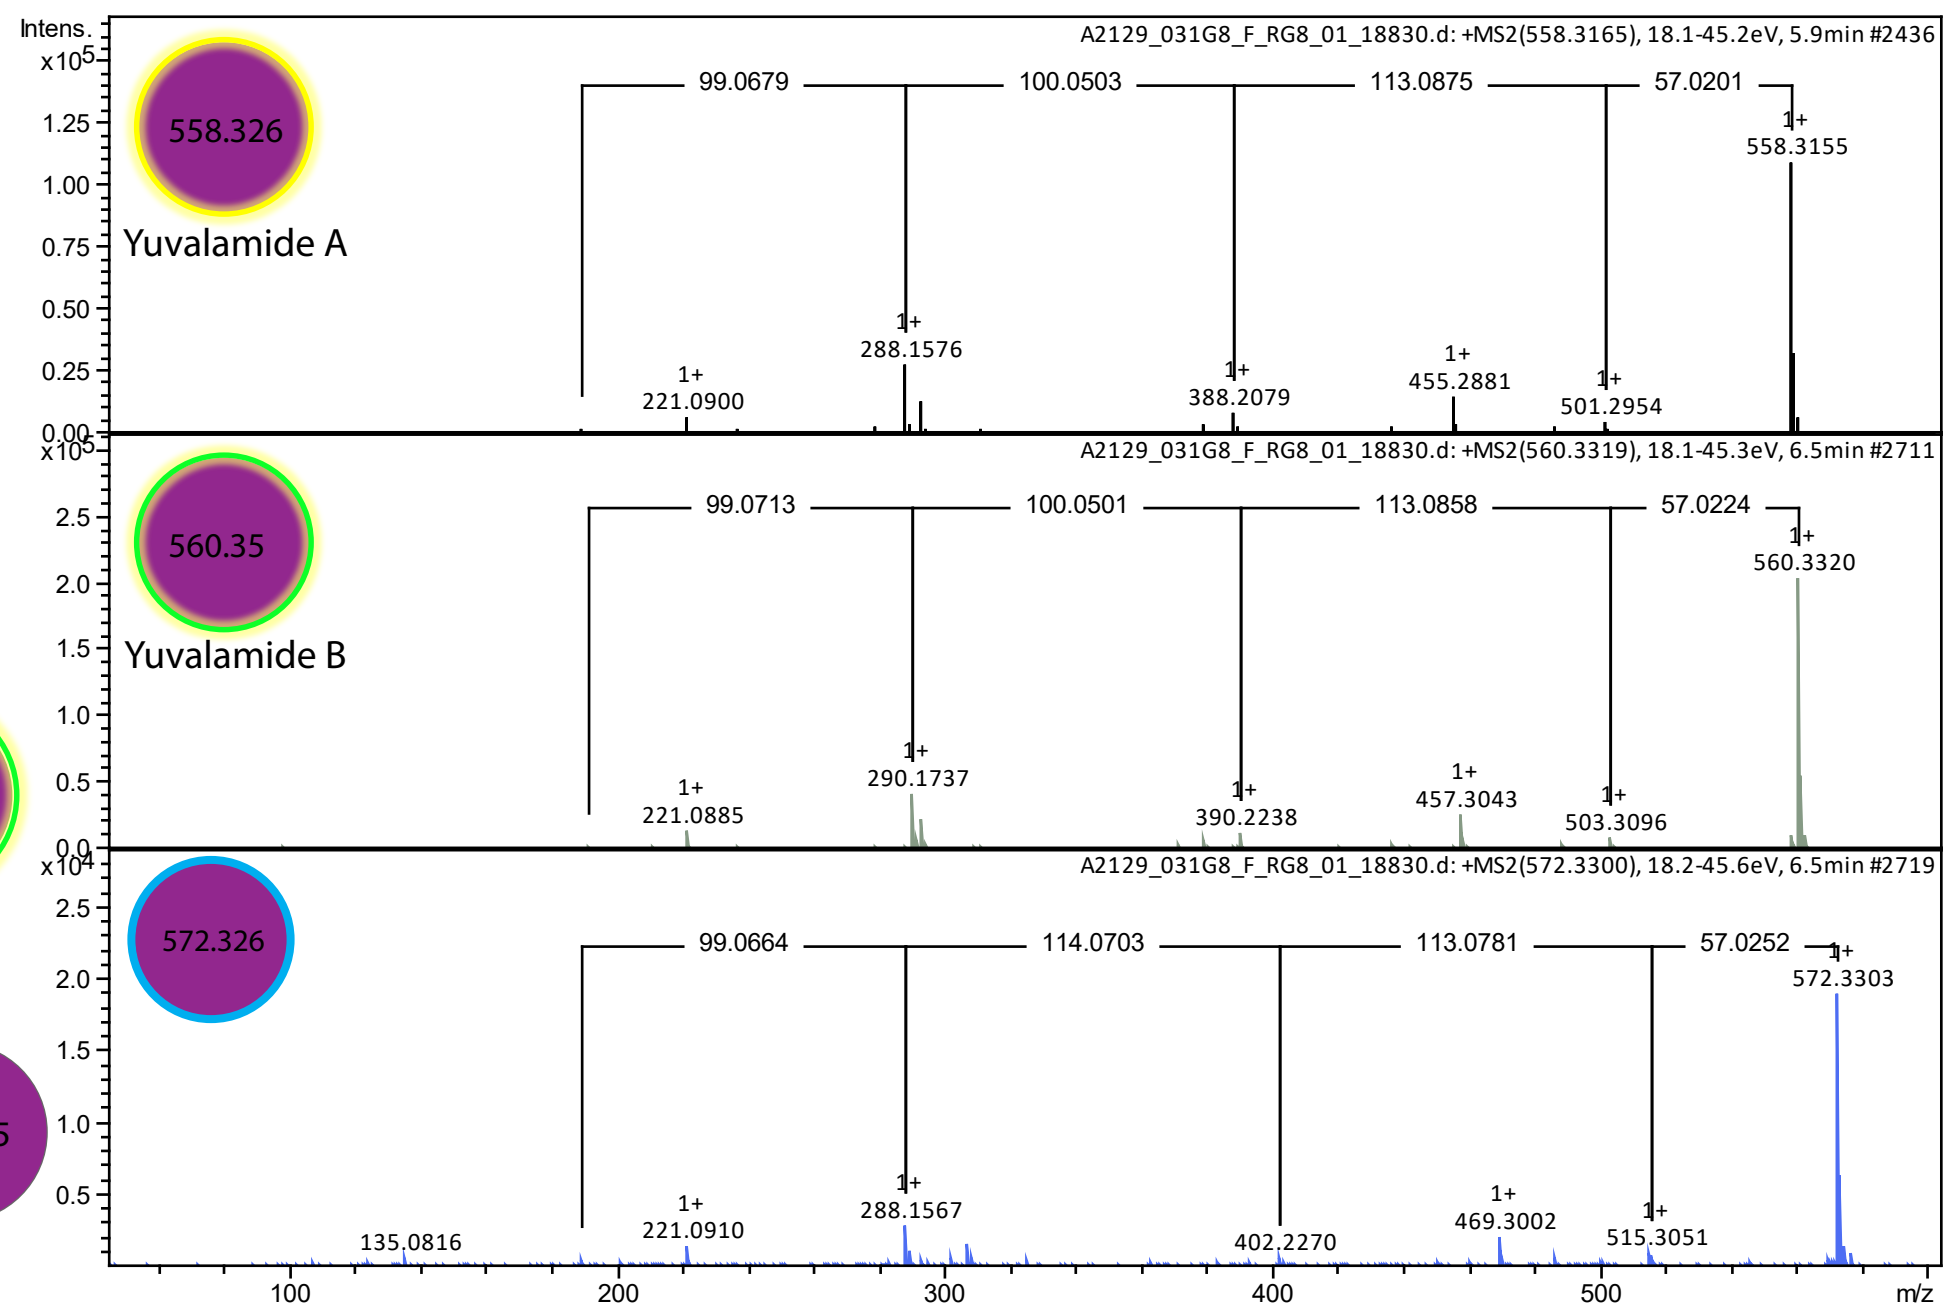

Supplement: supp [file elife_poa_e24214_Figure_5_Figure_Supplement_3.pdf › elife_poa_e24214_Figure_5_Figure_Supplement_3.pdf]
